# Supplementary material for: Stable salts of the hexacarbonyl chromium(I) cation and its pentacarbonyl-nitrosyl chromium(I) analogue
Source: PubMed Central journal article supplement (PMC6367395; doi:10.1038/s41467-019-08517-2), 2019-02-07
Supplement: 41467_2019_8517_MOESM1_ESM.pdf [file 41467_2019_8517_MOESM1_ESM.pdf]

# **Supplementary Information for**

## **Stable Salts of the Hexacarbonyl Chromium(I) Cation and its Pentacarbonyl-Nitrosyl Chromium(I) Analogue**

Bohnenberger et al.

## Table of Contents

|                                                                                     |    |
|-------------------------------------------------------------------------------------|----|
| 1. Supplementary Methods.....                                                       | 3  |
| 2. Experimental glassware and pictures of complexes 1 and 2.....                    | 7  |
| 3. Synthesis of $\text{NO}[\text{F}-\{\text{Al}(\text{OR}^{\text{F}})_3\}_2]$ ..... | 9  |
| 4. Detailed Synthesis and Characterization of compounds 1–4.....                    | 12 |
| 5. NMR Spectra.....                                                                 | 16 |
| 6. Evans NMR Method.....                                                            | 26 |
| 7. Vibrational Analysis.....                                                        | 30 |
| 8. Gas Phase IR Spectra .....                                                       | 34 |
| 9. EPR Spectroscopy .....                                                           | 35 |
| 10. IR and Raman Spectra .....                                                      | 41 |
| 11. UV/Vis Spectra.....                                                             | 47 |
| 12. Elemental Analyses .....                                                        | 48 |
| 13. Powder XRD Data and Rietveld Refinement.....                                    | 49 |
| 14. Single-Crystal XRD Data .....                                                   | 59 |
| 15. Hirshfeld Plots .....                                                           | 81 |
| 16. Solution Thermodynamics Calculations.....                                       | 82 |
| 17. Details on the gase phase energetics and DFT calculations .....                 | 83 |
| 18. Additional information on the DFT calculations.....                             | 84 |

## 1. Supplementary Methods

**General Conditions.** All manipulations on substrates and products were undertaken in a MBraun glovebox filled with Ar ( $\text{O}_2$ ,  $\text{H}_2\text{O}$  < 1 ppm). All experiments were carried out in special double-Schlenk tubes<sup>1</sup> (Supplementary Figure 1) separated by a G3 or G4 frit with grease-free PTFE or glass valves in an inert atmosphere using vacuum and standard Schlenk techniques. Solvents were dried by standard methods using  $\text{CaH}_2$  or  $\text{P}_4\text{O}_{10}$  and distilled prior to use.  $\text{Cr}(\text{CO})_6$  (VWR/Merck) was purified by sublimation before use.  $\text{NO}[\text{Al}(\text{OR}^{\text{F}})_4]$   $\{\text{R}^{\text{F}} = \text{C}(\text{CF}_3)_3\}$  was synthesized according to literature<sup>2</sup>.  $\text{NO}[\text{F}-\{\text{Al}(\text{OR}^{\text{F}})_3\}_2]$   $\{\text{R}^{\text{F}} = \text{C}(\text{CF}_3)_3\}$  was prepared from  $\text{NO}[\text{PF}_6]$  (Acros) and  $\text{Me}_3\text{Si-F-Al}(\text{OR}^{\text{F}})_3$ <sup>3</sup> (see Experimental Section for a detailed synthesis).

**NMR Spectroscopy.** NMR samples were prepared in 5 mm thick walled NMR tubes with J. Young valves. The  $^1\text{H}$ ,  $^{13}\text{C}\{^1\text{H}\}$ ,  $^{19}\text{F}$  and  $^{27}\text{Al}$  spectra were recorded either on a Bruker Avance II+ 400 MHz, on a Bruker Avance III HD 300 MHz or on a Bruker Avance 200 MHz spectrometer either in 1,2- $\text{F}_2\text{C}_6\text{H}_4$  (*ortho*-difluorobenzene, *o*DFB) or  $\text{CD}_2\text{Cl}_2$  (0.4-0.6 mL) at r.t. Measurements conducted in 1,2- $\text{F}_2\text{C}_6\text{H}_4$  were calibrated by using the  $^{19}\text{F}$  signal of the solvent 1,2- $\text{F}_2\text{C}_6\text{H}_4$  ( $\delta = -139.0$  ppm<sup>4</sup>, rel. to  $\text{CCl}_3\text{F}$ ). The field corrections of other nuclei were adjusted accordingly. Measurements conducted in  $\text{CD}_2\text{Cl}_2$  were calibrated to the residual solvent signal for  $^1\text{H}$  ( $\delta = 5.32$  ppm<sup>5</sup>, rel. to TMS) and  $^{13}\text{C}\{^1\text{H}\}$  ( $\delta = 53.84$  ppm<sup>5</sup>, rel. to TMS). Measurements conducted in 1,2,3,4- $\text{F}_4\text{C}_6\text{H}_2$  were calibrated to the residual solvent signal for  $^1\text{H}$  ( $\delta = 7.04$  ppm<sup>6</sup>, rel. to TMS). The field corrections of other nuclei were adjusted accordingly. The Bruker Topspin software package (version 3.2) was used for measuring and processing of the spectra. Typical very small impurities were detected in the  $^{19}\text{F}$  NMR at  $-74.8$  ( $\text{HO}(\text{CF}_3)_3$ ) and  $-75.5$  ppm. Paramagnetic shifts via Evans' method<sup>7-9</sup> were measured in a 1:6 solution of  $\text{CD}_2\text{Cl}_2/1,2\text{-F}_2\text{C}_6\text{H}_4$  or  $\text{CH}_2\text{Cl}_2/1,2\text{-F}_2\text{C}_6\text{H}_4$  respectively with the  $^1\text{H}$  NMR shift of dichloromethane ( $\delta = 5.32$  ppm) as standard in an open 3 mm thick NMR tube inside the J. Young NMR tube containing the solution of the paramagnetic substance. All graphical representations were performed using Topspin (version 3.2).

**Vibrational Spectroscopy.** FTIR measurements were performed on a FTIR Bruker ALPHA with a QuickSnap Platinum ATR sampling module inside the glovebox. The data were processed with the Bruker OPUS 7.5 software package. Unless otherwise stated, the spectra were recorded in the range of  $4000\text{-}550$   $\text{cm}^{-1}$  with a resolution of  $2$   $\text{cm}^{-1}$  at r.t. and a base line correction with 3 iterations was applied. The gas phase IR spectra were measured on a Nicolet

Magna 760 IR spectrometer with a custom-made IR cell (length: 20 cm, diameter: 4 cm) with a J. Young valve (see the respective spectra for more apparatus details). FT Raman spectra were recorded on a Bruker VERTEX 70 spectrometer equipped with a RAM II module (1064 nm exciting line of a NdYAG laser) by using a highly sensitive liquid N<sub>2</sub> cooled Ge detector. The samples were measured in flame sealed soda-lime glass Pasteur pipettes in the range of 4000-50 cm<sup>-1</sup> with a resolution of 4 cm<sup>-1</sup> at r.t. The data were processed with the Bruker OPUS 7.5 software package. Unless otherwise noted, the Raman spectra were cut off below 75 cm<sup>-1</sup> and a baseline correction with 5 iterations was applied. All IR and Raman spectra were normalized to 1 and intensities are given as follows: vvw = very very weak (< 0.1), vw = very weak (< 0.2), w = weak (< 0.3), mw = medium weak (< 0.4), m = medium (< 0.5), ms = medium strong (< 0.6), s = strong (< 0.7), vs = very strong (< 0.8), vvs = very very strong (≥ 0.9). Extremely weak bands (< 0.025) are not reported. Graphical representations have been done with OPUS 7.5 or with OriginPro (version 9.2).

**Single-Crystal X-ray Diffraction.** Single crystals were selected at r.t. under perfluoropolyalkylether oil (AB128330, ABCR GmbH & Co. KG) on 0.1, 0.2 or 0.3 mm micromounts (M1-L19-100/200/300). Structural data were collected from shock-cooled crystals on a Bruker SMART APEX II Quazar CCD area detector diffractometer using a D8 goniometer with an Incoatec Mo-Microfocus Source I $\mu$ S with mirror-monochromated Mo-K $\alpha$  radiation ( $\lambda = 0.71073 \text{ \AA}$ ) at 100(2) K. The diffractometer was equipped with an Oxford Cryosystem 800 low temperature device. The data were processed with APEX v2013.6-2, integrated with SAINT<sup>10</sup> (V8.37A) and an empirical absorption correction using SADABS 2014/5<sup>11</sup> or SADABS 2016/2<sup>11</sup> was applied. The structures were solved by direct methods using SHELXT<sup>12,13</sup>. Unless otherwise stated, all non-hydrogen atoms were refined anisotropically by full matrix least squares methods against weighted  $F^2$  values based on all independent reflections by using SHELXL-2014/7<sup>12,14</sup> with ShelXle as GUI software<sup>15</sup>. Disordered fragments were modelled with the help of the DSR software<sup>16</sup>. The graphical presentation of crystal structures was prepared either with Mercury (version 3.9)<sup>17</sup> or with OLEX2 (version 1.2)<sup>18</sup>. CCDC codes 1844666 (compound **2**), 1844667 (**1**), 1844668 (**3**), 1844669 (**4**) contain the supplementary crystallographic data for this paper. These data can be obtained free of charge from The Cambridge Crystallographic Data Centre via: <https://summary.ccdc.cam.ac.uk/structure-summary-form>. Hirshfeld-surface plots were generated using the CrystalExplorer<sup>19</sup> software package with an Isovalue of 0.5.

**Powder Diffraction.** The powder diffractograms were recorded with the sample in a 0.5 mm thick capillary (Hilgenberg GmbH, wall thickness 0.01 mm) sealed with perfluoropolyalkylether oil (AB128330, ABCR GmbH & Co. KG), at about 100(10) K in the  $\Theta$  range 3–42° with a STOE STADI P powder diffractometer with Mo- $K_{\alpha 1}$  radiation ( $\lambda = 0.709300 \text{ \AA}$ ) equipped with Ge-(111) monochromator and Mythen 1K detector. Data acquiring, processing and the calculation of powder diffractograms from single-crystal data were performed using STOE WinXPOW<sup>®</sup> package. All powder diffractograms were background corrected.

**UV/Vis spectroscopy.** UV/Vis reflectance spectra were recorded at r.t. on a Thermoscientific Evolution 600 spectrometer equipped with an integration sphere. The baseline was measured against Spectralon<sup>®</sup>. To protect the powdered samples from air and moisture during measurements, a special sample holder with a quartz window was used.

**EPR spectroscopy.** EPR spectra were recorded using a Bruker EMXplus continuous wave (cw) X-Band spectrometer with nitrogen cooling for 100 K measurements and liquid helium cooling for 4 K measurements, respectively. Samples were filled into fused silica glass tubes. Solvents were vacuum transferred to the samples and afterwards the sample tubes were sealed under vacuum. EPR spectra were analysed and simulated using the EasySpin MATLAB toolbox<sup>20,21</sup>.

**Computational Details.** Quantum chemical calculations were performed with the TURBOMOLE<sup>22,23</sup> program package (version 7.0). All investigated molecular structures were optimized at the density functional theory (DFT) and were run in redundant internal coordinates using the BP86<sup>24,25</sup> functional with the resolution-of-identity (RI) approximation<sup>26,27</sup> together with the basis set def2-TZVPP<sup>28</sup> and with dispersion correction (DFT-D3BJ)<sup>29,30</sup>. A fine integration grid (m4) and the default SCF convergence criteria ( $10^{-6}$  a.u.) were used. All optimized structures were checked for minima (no imaginary frequencies) with the implemented module AOFORCE<sup>31</sup> and for proper spin occupancies using the implemented module EIGER. Entropic contributions to enthalpy and Gibbs free energy with inclusion of zero point energies (ZPE) were calculated at the BP86-D3BJ/def2-TZVPP level for standard conditions with the FREEH module. IR and Raman intensities were calculated with the Gaussian<sup>32</sup> software at BP86/def2-TZVP.

Symmetry restricted structure optimizations of the  $[\text{Cr}(\text{CO})_6]^+$  cation were performed with the TURBOMOLE 7.1 software package on the TPSSh<sup>33,34</sup>/def2-TZVPP level of theory with RI approximation and D3-BJ dispersion correction (integration grid m5, SCF convergence  $10^{-9}$  a.u., density convergence  $\leq 10^{-7}$ , cartesian gradient  $\leq 10^{-4}$ ). DLPNO-CCSD(T)<sup>35,36</sup>/def2-TZVPP

single point energy calculations were performed with the ORCA 4.0.1<sup>37</sup> program code without symmetry restriction. We have chosen tight thresholds for the domain-based local pair natural orbital method (DLPNO), i.e. pair correlation energy threshold  $T_{\text{CutPairs}}=10^{-5} E_h$ , PNO occupation threshold  $T_{\text{CutPNO}}=10^{-7}$  and domain size for PNO expansion  $T_{\text{CutMKN}}=10^{-4}$ . We made use of the RIJCOSX procedure<sup>38-40</sup>.

State Averaged (SA) Complete Active Shell Self Consistent Field (CAS-SCF)<sup>41</sup> calculations were done with ORCA 4.0.1 using Dunning's correlation consistent cc-pVTZ basis set<sup>42,43</sup>. Correlation corrections were taken into account by Strongly-Contracted N-Electron Valence State Perturbation Theory (SC-NEVPT2)<sup>44,45</sup>. The CAS-SCF wave function served to calculate g-tensors for minimum structures of the  $[\text{Cr}(\text{CO})_6]^{*+}$  cation by the Effective Hamiltonian formalism<sup>46</sup>. The SA-CAS-SCF calculations were carried out in the basis of 13 doublet, 17 quartet and 1 sextet roots arising from the  $^6\text{S}$ ,  $^4\text{G}$ ,  $^4\text{P}$ ,  $^4\text{D}$  and  $^2\text{I}$  terms of the free  $\text{Cr}^+$  cation. The active space consists of 9 electrons in 10 orbitals of the first and second chromium *d*-shell and two additional chromium-ligand binding orbitals, i.e. CAS(9,12).

## 2. Experimental glassware and pictures of complexes 1 and 2

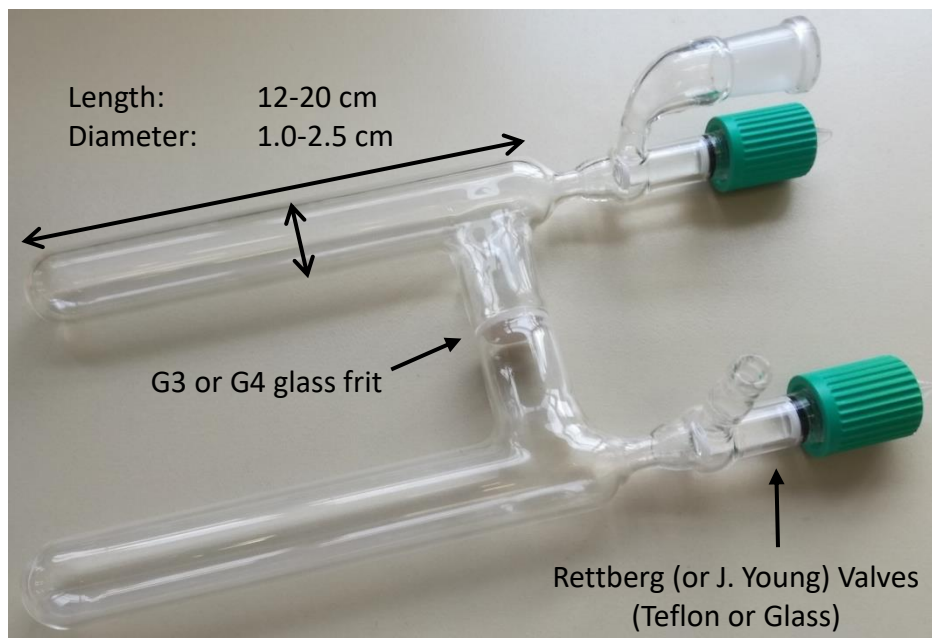

*Supplementary Figure 1.* Double-Schlenk tube that was typically used for most reactions and crystallizations. Note that different varieties (sizes, Rettberg or J. Young valves) were used.

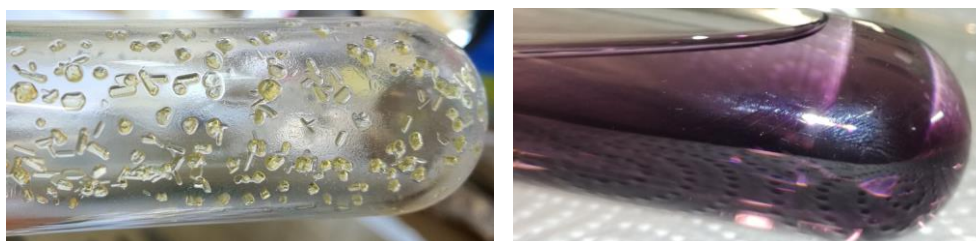

*Supplementary Figure 2.* Yellow crystals and purple oDFB solution of **1**.

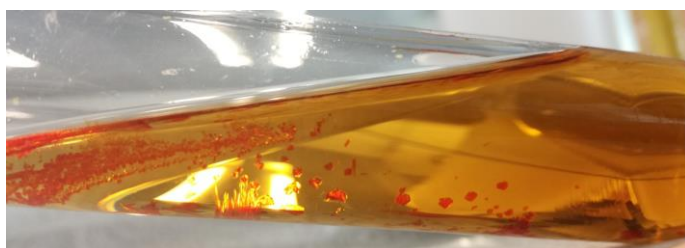

*Supplementary Figure 3.* Orange crystals and orange oDFB solution of **3**

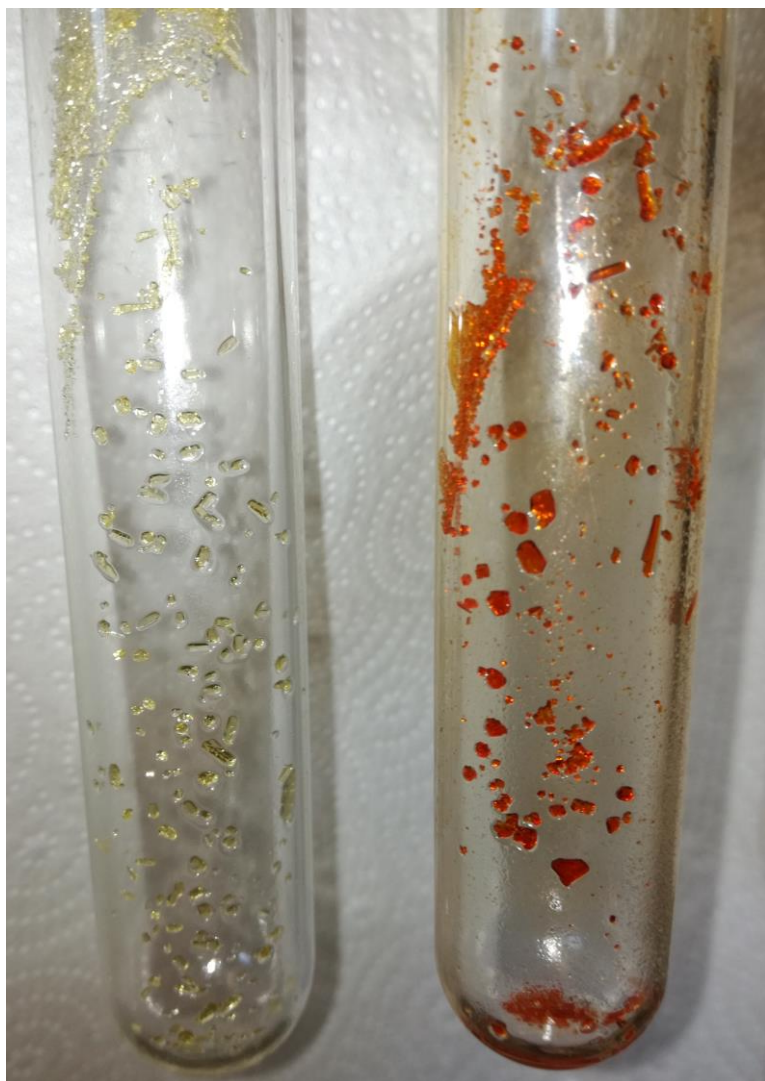

*Supplementary Figure 4. Yellow (left, 1) and orange (right, 2) block-shaped crystals.*



### 3. Synthesis of NO[F-{Al(OR<sup>F</sup>)<sub>3</sub>}<sub>2</sub>]

A double-Schlenk flask was equipped inside the glove box with Me<sub>3</sub>Si-F-Al(OR<sup>F</sup>)<sub>3</sub> (1970 mg, 2.39 mmol, 2 eq.) and NO[PF<sub>6</sub>] (207 mg, 1.18 mmol, 1 eq.). The flask was equipped with a bubbler and SO<sub>2</sub> (ca. 5 mL) was condensed onto the reaction mixture at -196 °C. The vessel was then carefully vented with Ar and the bubbler was opened towards the fume hood while the reaction mixture was stirred at -35 °C for 45 min (evolution of PF<sub>5</sub>!). Then, the volatiles were removed at 0 °C and a white solid was obtained, which was further dried *in vacuo* (Yield: 1700 mg, 1.12 mmol, 95%).

**FT Raman** (1000 scans, 100 mW, 4 cm<sup>-1</sup>):  $\tilde{\nu}/\text{cm}^{-1}$  (intensity) = 2339 (vw,  $\nu(\text{NO}^+)$ ), 1357 (vww), 1319 (vw), 1280 (vw), 1255 (vw), 977 (vww), 815 (mw), 753 (vvs), 571 (w), 539 (mw), 365 (w), 326 (ms), 292 (w), 235 (vw), 119 (vww), 94 (vww).

**<sup>1</sup>H NMR** (400.17 MHz, 1,2,3,4-F<sub>4</sub>C<sub>6</sub>H<sub>2</sub>, 298 K): *minor impurities at ~8.7, ~4.0 (solvent) and ~1.0 ppm*; **<sup>14</sup>N NMR** (28.92 MHz, 1,2,3,4-F<sub>4</sub>C<sub>6</sub>H<sub>2</sub>, 298 K):  $\delta$  /ppm = 31 (br. s., 1N, [NO×(1,2,3,4-F<sub>4</sub>C<sub>6</sub>H<sub>2</sub>)<sub>x</sub>]<sup>+</sup>); **<sup>19</sup>F NMR** (376.54 MHz, 1,2,3,4-F<sub>4</sub>C<sub>6</sub>H<sub>2</sub>, 298 K):  $\delta$ /ppm = -76.1 (s, 54F, F-{Al(OC(CF<sub>3</sub>)<sub>3</sub>)<sub>3</sub>}<sub>2</sub>, -184.7 (br. s, 1F, F-{Al(OR<sup>F</sup>)<sub>3</sub>}<sub>2</sub>), *minor impurities at -76 and -76.5 ppm, minor impurities (coming from the solvent) at -116, -134 and -144 ppm*; **<sup>27</sup>Al NMR** (104.27 MHz, 1,2,3,4-F<sub>4</sub>C<sub>6</sub>H<sub>2</sub>, 298 K):  $\delta$  /ppm = ~32 (v.br. s, 2Al, F-{Al(OR<sup>F</sup>)<sub>3</sub>}<sub>2</sub>). (See Supplementary Figure 5 to Supplementary Figure 8).

*Note:* NO[PF<sub>6</sub>] was dried in high vacuum (10<sup>-5</sup> mbar) over the period of several days prior to use; upon dissolution in 1,2,3,4-F<sub>4</sub>C<sub>6</sub>H<sub>2</sub>, an intensely coloured [Arene-NO]<sup>+</sup> charge-transfer complex is formed.

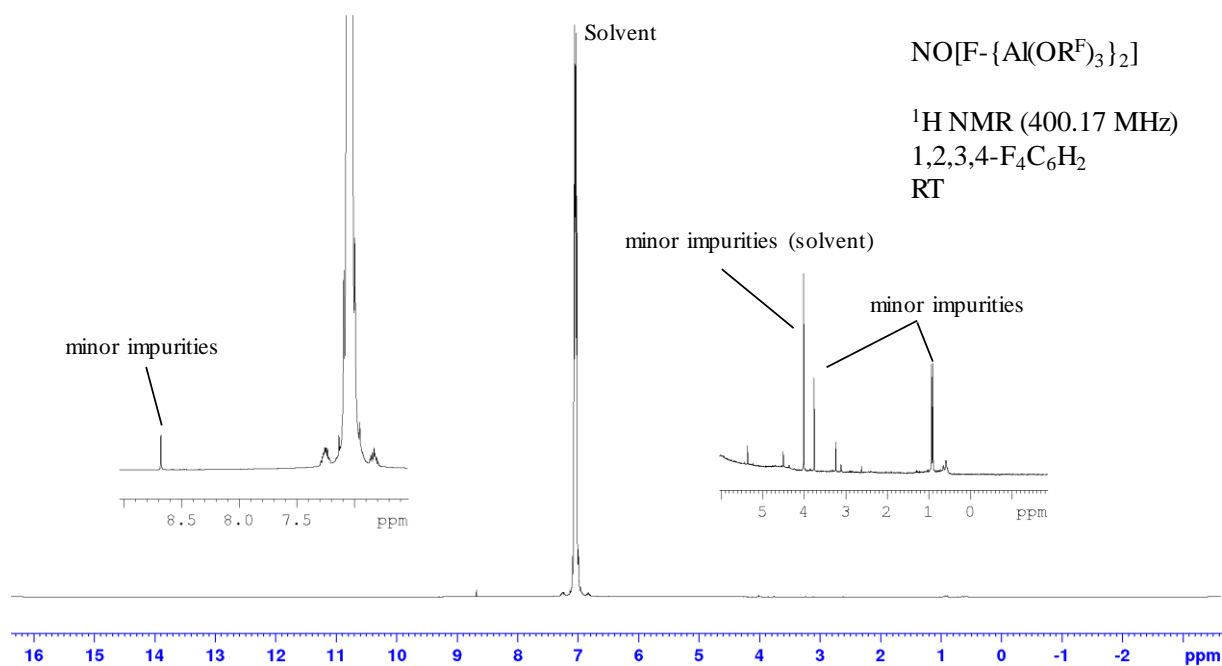

Supplementary Figure 5.  $^1H$  NMR spectrum (400.17 MHz, 1,2,3,4-F<sub>4</sub>C<sub>6</sub>H<sub>2</sub>, RT) of NO[F- $\{Al(OR^F)_3\}_2$ ].

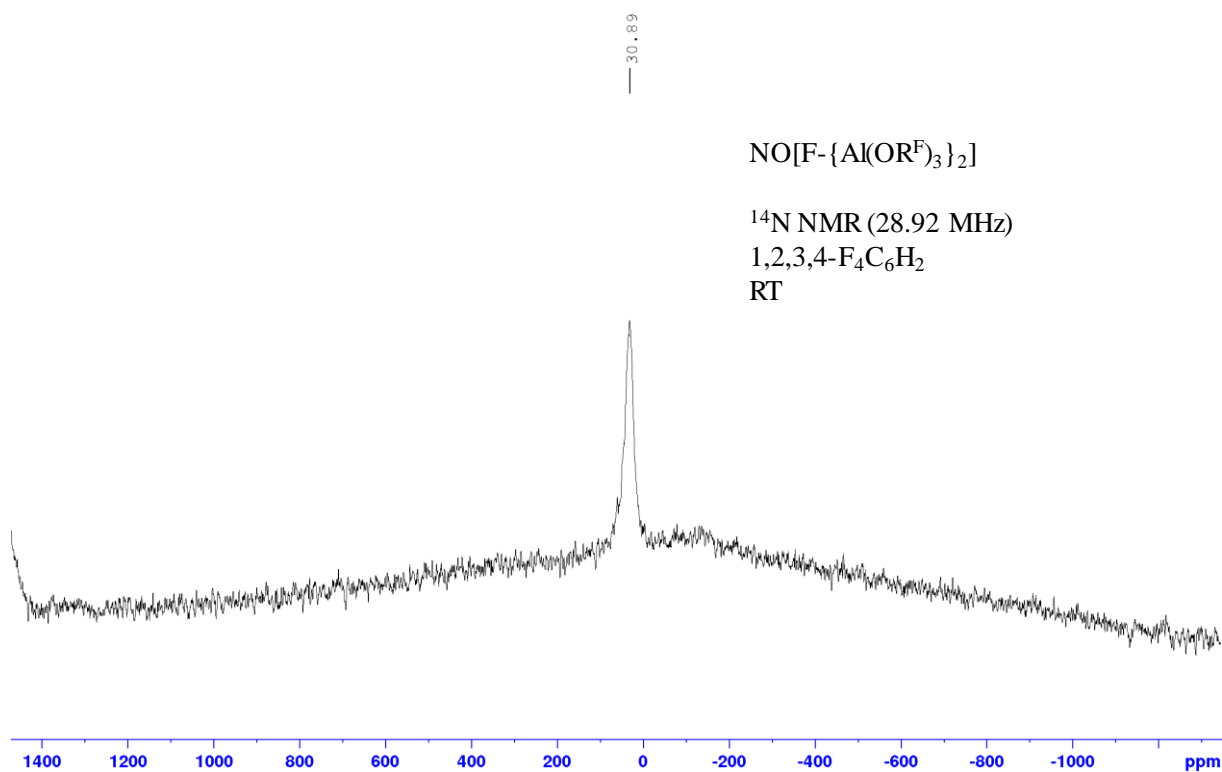

Supplementary Figure 6.  $^{14}N$  NMR spectrum (28.92 MHz, 1,2,3,4-F<sub>4</sub>C<sub>6</sub>H<sub>2</sub>, RT) of NO[F- $\{Al(OR^F)_3\}_2$ ].

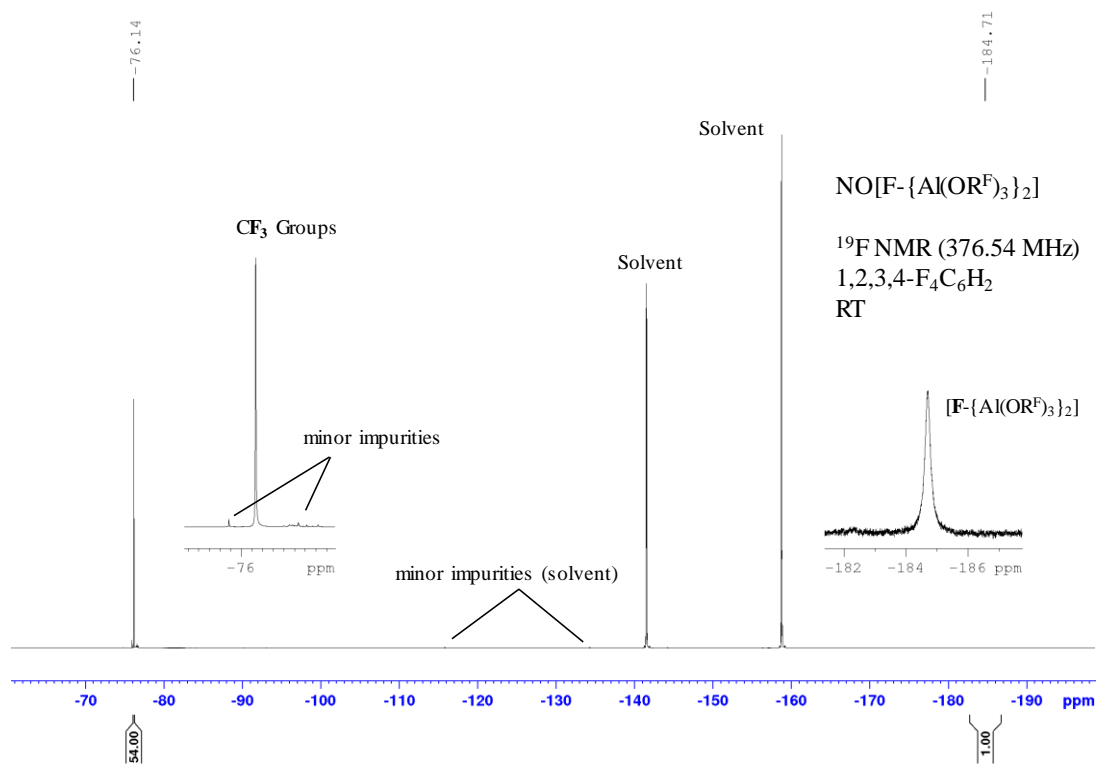

Supplementary Figure 7. <sup>19</sup>F NMR spectrum (376.54 MHz, 1,2,3,4-F<sub>4</sub>C<sub>6</sub>H<sub>2</sub>, RT) of NO[F-{Al(OR<sup>F</sup>)<sub>3</sub>}<sub>2</sub>].

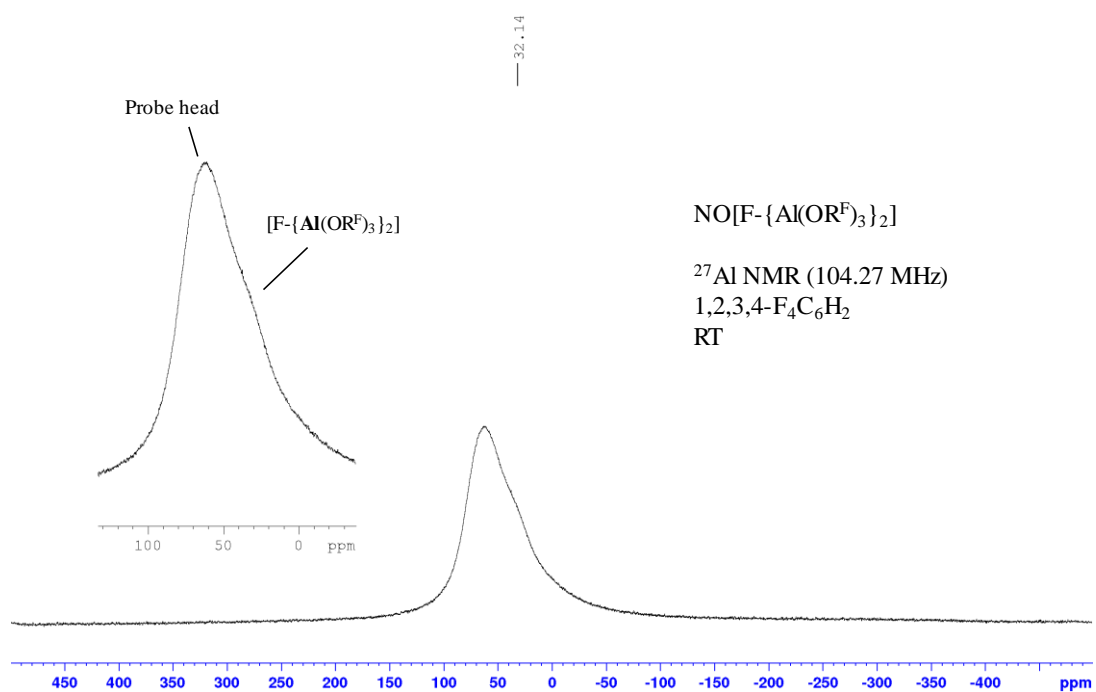

Supplementary Figure 8. <sup>27</sup>Al NMR spectrum (104.27 MHz, 1,2,3,4-F<sub>4</sub>C<sub>6</sub>H<sub>2</sub>, RT) of NO[F-{Al(OR<sup>F</sup>)<sub>3</sub>}<sub>2</sub>].

#### 4. Detailed Synthesis and Characterization of compounds 1–4

##### [Cr(CO)<sub>6</sub>][Al(OR<sup>F</sup>)<sub>4</sub>] (**1**)

A double-Schlenk flask was equipped inside the glove box with Cr(CO)<sub>6</sub> (51 mg, 0.232 mmol, 1 eq.) and NO[Al(OR<sup>F</sup>)<sub>4</sub>] (230 mg, 0.231 mmol, 1 eq.). Then, CH<sub>2</sub>Cl<sub>2</sub> (~4 mL) was condensed at –196 °C onto the reaction mixture and it was allowed to thaw to –78 °C under dynamic vacuum. Upon dissolution, the colour turned initially blue and a gas evolution was visible. The mixture was stirred under dynamic vacuum (so that the solvent was very mildly boiling) until it reached r.t. over the period of an hour. The CH<sub>2</sub>Cl<sub>2</sub> (~2 mL) was then filtered off and the remaining solid was dried *in vacuo* in order to yield **1** as an off-white to beige solid (260 mg, 0.219 mmol, 94%). Single crystals were obtained by slow vapour diffusion of *n*-pentane in a solution of **1** in 1,2-F<sub>2</sub>C<sub>6</sub>H<sub>4</sub> (*o*DFB) at r.t.

**FTIR** (ZnSe, ATR):  $\tilde{\nu}/\text{cm}^{-1}$  (intensity) = 2094 (s), 1843 (vww, *trace of [Cr(CO)<sub>5</sub>(NO)]<sup>+</sup>*), 1508 (vww, *trace of residual oDFB*), 1352 (vw), 1298 (mw), 1272 (ms), 1239 (s), 1208 (vvs), 1161 (ms), 969 (vvs), 831 (vw), 756 (vww), 726 (vvs), 571 (vww), 560 (vw). (See Supplementary Figure 42)

**FT Raman** (1000 scans, 100 mW, 4 cm<sup>-1</sup>):  $\tilde{\nu}/\text{cm}^{-1}$  (intensity) = 2175 (vvs), 2128 (mw), 2062 (vw), 1304 (vww), 1272 (vww), 1235 (vww), 1163 (vww), 977 (vww), 798 (w), 747 (w), 572 (vww), 563 (vww), 538 (vw), 368 (vww), 332 (m), 288 (w), 234 (vww), 173 (vww). (See Supplementary Figure 43)

**<sup>1</sup>H NMR** (400.17 MHz, *o*DFB, 298 K): *only solvent signals*; **<sup>13</sup>C{<sup>1</sup>H} NMR** (100.62 MHz, *o*DFB, 298 K):  $\delta/\text{ppm}$  = 121.7 (q, <sup>1</sup>J(C,F) = 293 Hz, 12C, CF<sub>3</sub>, *in part overlapped by solvent signals*); **<sup>19</sup>F NMR** (376.54 MHz, *o*DFB, 298 K):  $\delta/\text{ppm}$  = –75.3 (s, 36F, 4 × C(CF<sub>3</sub>)<sub>3</sub>); **<sup>27</sup>Al NMR** (104.27 MHz, *o*DFB, 298 K):  $\delta/\text{ppm}$  = 35.0 (s, 1Al, Al(OR<sup>F</sup>)<sub>4</sub>). (See Supplementary Figure 9 to Supplementary Figure 12)

*Note:* The solution of **1** in *o*DFB is of an intensive purple colour and yields light-yellow crystals (see Supplementary Figure 2 and Supplementary Figure 4 left). The content of orange [Cr(CO)<sub>5</sub>(NO)][Al(OR<sup>F</sup>)<sub>4</sub>] impurities determine the colour of the product, giving the powder as well as the crystals a yellow to orange touch.

The respective UV/Vis spectra are shown in Supplementary Figure 50.

## **[Cr(CO)<sub>6</sub>][F-{Al(OR<sup>F</sup>)<sub>3</sub>}<sub>2</sub>] (2)**

A double-Schlenk flask was equipped inside the glove box with Cr(CO)<sub>6</sub> (66 mg, 0.30 mmol, 1.3 eq) and NO[F-{Al(OR<sup>F</sup>)<sub>3</sub>}<sub>2</sub>] (350 mg, 0.231 mmol, 1 eq.). Then, CH<sub>2</sub>Cl<sub>2</sub> (~5 mL) was added at -20 °C to the reaction mixture and it was stirred at -20 °C under dynamic vacuum for 40 min. The reaction mixture was allowed to warm up to r.t. and the crude product was washed with the residual CH<sub>2</sub>Cl<sub>2</sub> (three times). After drying *in vacuo*, **2** yielded as an off-white solid (340 mg, 0.20 mmol, 91%). Colourless single crystals were obtained by slow vapour diffusion of *n*-pentane in a solution of **2** in *o*DFB at r.t.

**FTIR** (ZnSe, ATR):  $\tilde{\nu}/\text{cm}^{-1}$  (intensity) = 2096 (s), 1841 (vww, *trace of [Cr(CO)<sub>5</sub>(NO)]<sup>+</sup>*), 1509 (vww, *trace of residual oDFB*), 1355 (vw), 1300 (mw), 1247 (vvs), 1216 (vvs), 1184 (s), 972 (vvs), 865 (w), 760 (vww), 751 (vww), 726 (vvs), 639 (w), 568 (vw). (See Supplementary Figure 44)

**FT Raman** (100 scans, 500 mW, 4 cm<sup>-1</sup>):  $\tilde{\nu}/\text{cm}^{-1}$  (intensity) = 2173 (vvs), 2126 (mw), 2062 (vw), 1304 (vww), 1281 (vww), 1244 (vww), 1180 (vww), 1131 (vww), 980 (vww), 818 (vw), 753 (ms), 571 (vw), 539 (vw), 370 (vw), 328 (ms), 291 (vw), 234 (vww). (See Supplementary Figure 45)

**<sup>1</sup>H NMR** (400.17 MHz, *o*DFB, 298 K): *only solvent signals*; **<sup>13</sup>C{<sup>1</sup>H} NMR** (50.32 MHz, *o*DFB, 298 K): *only solvent signals*; **<sup>19</sup>F NMR** (376.54 MHz, *o*DFB, 298 K):  $\delta/\text{ppm} = -75.5$  (s, 54F, F-{Al(OC(CF<sub>3</sub>)<sub>3</sub>)<sub>3</sub>}<sub>2</sub>), -184.5 (br. s, 1F, F-{Al(OR<sup>F</sup>)<sub>3</sub>}<sub>2</sub>); **<sup>27</sup>Al NMR** (104.27 MHz, *o*DFB, 298 K):  $\delta/\text{ppm} = \sim 35$  (v.br. s, 2Al, F-{Al(OR<sup>F</sup>)<sub>3</sub>}<sub>2</sub>). (See Supplementary Figure 13 to Supplementary Figure 16)

The respective UV/Vis spectra are shown in Supplementary Figure 50.

### [Cr(CO)<sub>5</sub>(NO)][Al(OR<sup>F</sup>)<sub>4</sub>] (**3**)

A double-Schlenk flask was equipped inside the glove box with Cr(CO)<sub>6</sub> (51 mg, 0.232 mmol, 1 eq) and NO[Al(OR<sup>F</sup>)<sub>4</sub>] (228 mg, 0.229 mmol, 1 eq.). Then, CH<sub>2</sub>Cl<sub>2</sub> (~3 mL) was added at r.t. to the reaction mixture and the closed vessel was stirred for 14 d at r.t. After drying *in vacuo*, **3** yielded as an orange solid (250 mg, 0.210 mmol, 92%). Orange single crystals were obtained by slow vapour diffusion of *n*-pentane in a solution of **3** in *o*DFB at r.t.

**FTIR** (ZnSe, ATR):  $\tilde{\nu}/\text{cm}^{-1}$  (intensity) = 2184 (vw), 2164 (vvw), 2127 (vvw), 2108 (ms), 2074 (vvw), 1841 (mw), 1821 (vvw, *trace of unknown impurity*), 1353 (vw), 1299 (mw), 1273 (ms), 1251 (ms), 1239 (ms), 1210 (vvs), 1162 (mw), 1140 (vw), 971 (vvs), 866 (vvw), 832 (vw), 756 (vvw), 727 (vs), 657 (w), 640 (vw), 571 (vvw), 561 (vw). (See Supplementary Figure 46)

**FT Raman** (100 scans, 500 mW, 4 cm<sup>-1</sup>):  $\tilde{\nu}/\text{cm}^{-1}$  (intensity) = 2185 (m), 2175 (vw), 2164 (m), 2127 (vvs), 2112 (vw), 2076 (vvw), 1843 (vvw), 1304 (vvw), 1275 (vvw), 977 (vvw), 797 (vw), 747 (vw), 640 (vw), 562 (vvw), 539 (vvw), 487 (vvw), 369 (vvw), 332 (vw), 290 (vvw), 234 (vvw). (See Supplementary Figure 47)

**<sup>1</sup>H NMR** (300.18 MHz, *o*DFB, 298 K): *only solvent signals*; **<sup>13</sup>C{<sup>1</sup>H} NMR** (100.62 MHz, *o*DFB, 298 K):  $\delta/\text{ppm}$  = 201.9 (s, 4C<sub>equatorial</sub>, Cr(CO)<sub>5</sub>(NO)), 187.3 (s, 1C<sub>axial</sub>, Cr(CO)<sub>5</sub>(NO)), 121.7 (q, <sup>1</sup>J(C,F) = 293 Hz, 12C, CF<sub>3</sub>, *in part overlapped by solvent signals*), 79.5 (m, 4C, 4 × C(CF<sub>3</sub>)<sub>3</sub>); **<sup>14</sup>N NMR** (21.69 MHz, *o*DFB, 298 K):  $\delta/\text{ppm}$  = 17 (br. s, 1N, Cr(CO)<sub>5</sub>(NO)); **<sup>19</sup>F NMR** (376.54 MHz, *o*DFB, 298 K):  $\delta/\text{ppm}$  = -75.3 (s, 36F, 4 × C(CF<sub>3</sub>)<sub>3</sub>), *minor unknown impurity at -75.1 ppm*; **<sup>27</sup>Al NMR** (78.22 MHz, *o*DFB, 298 K):  $\delta/\text{ppm}$  = 35.0 (s, 1Al, Al(OR<sup>F</sup>)<sub>4</sub>). (See Supplementary Figure 17 to Supplementary Figure 21)

*Note:* The solution of **3** in *o*DFB is of an orange colour and yields orange crystals (see Supplementary Figure 3 and Supplementary Figure 4).

**[Cr(CO)<sub>5</sub>(NO)][F-{Al(OR<sup>F</sup>)<sub>3</sub>}<sub>2</sub>] (**4**)**

A double-Schlenk flask was equipped inside the glove box with Cr(CO)<sub>6</sub> (50 mg, 0.227 mmol, 1 eq) and NO[F-{Al(OR<sup>F</sup>)<sub>3</sub>}<sub>2</sub>] (350 mg, 0.231 mmol, 1 eq.). Then, CH<sub>2</sub>Cl<sub>2</sub> (~3 mL) was added at r.t. to the reaction mixture and the closed vessel was stirred for 10 d at r.t. After extracting with CH<sub>2</sub>Cl<sub>2</sub> (three times) and drying *in vacuo*, **4** yielded as an orange solid (360 mg, 0.211 mmol, 93%). Orange single crystals were obtained by slow vapour diffusion of *n*-pentane in a solution of **4** in *o*DFB at 0 °C.

**FTIR** (ZnSe, ATR):  $\tilde{\nu}/\text{cm}^{-1}$  (intensity) = 2183 (vw), 2162 (vvw), 2107 (vs), 2099 (m), 2072 (vvw), 1839 (ms), 1809 (vvw *trace of unknown impurity*), 1355 (vw), 1300 (mw), 1278 (m), 1248 (vvs), 1216 (vvs), 1185 (s), 973 (vvs), 865 (w), 760 (vvw), 727 (vvs), 657 (w), 638 (mw), 568 (vw). (See Supplementary Figure 48)

**FT Raman** (100 scans, 500 mW, 4 cm<sup>-1</sup>):  $\tilde{\nu}/\text{cm}^{-1}$  (intensity) = 2184 (m), 2173 (vw), 2163 (m), 2125 (vvs), 2110 (vvw), 2074 (vvw), 1842 (vvw), 1305 (vvw), 1281 (vvw), 1244 (vvw), 1180 (vvw), 1130 (vvw), 980 (vvw), 818 (vvw), 753 (w), 639 (vw), 572 (vvw), 539 (vvw), 487 (vvw), 370 (vvw), 332 (vw), 293 (vvw), 233 (vvw). (See Supplementary Figure 49)

**<sup>1</sup>H NMR** (400.17 MHz, *o*DFB, 298 K): *only solvent signals*; **<sup>13</sup>C{<sup>1</sup>H} NMR** (100.62 MHz, *o*DFB, 298 K):  $\delta/\text{ppm}$  = 201.2 (s, 4C<sub>equatorial</sub>, Cr(CO)<sub>5</sub>(NO)), 186.5 (s, 1C<sub>axial</sub>, Cr(CO)<sub>5</sub>(NO)), 120.3 (q, <sup>1</sup>J(C,F) = 291 Hz, 12C, CF<sub>3</sub>, *in part overlapped by solvent signals*), 78.1 (m, 6C, F-{Al(OC(CF<sub>3</sub>)<sub>3</sub>)<sub>3</sub>}<sub>2</sub>); **<sup>14</sup>N NMR** (28.92 MHz, *o*DFB, 298 K):  $\delta/\text{ppm}$  = 22 (br. s, 1N, Cr(CO)<sub>5</sub>(NO)); **<sup>19</sup>F NMR** (376.54 MHz, *o*DFB, 298 K):  $\delta/\text{ppm}$  = -76.3 (s, 54F, F-{Al(OC(CF<sub>3</sub>)<sub>3</sub>)<sub>3</sub>}<sub>2</sub>), -185.2 (br. s, 1F, F-{Al(OR<sup>F</sup>)<sub>3</sub>}<sub>2</sub>); **<sup>27</sup>Al NMR** (104.27 MHz, *o*DFB, 298 K):  $\delta/\text{ppm}$  = ~34 (v.br. s, 2Al, F-{Al(OR<sup>F</sup>)<sub>3</sub>}<sub>2</sub>). (See Supplementary Figure 22 to Supplementary Figure 26)

## 5. NMR Spectra

$[\text{Cr}(\text{CO})_6][\text{Al}(\text{OR}^{\text{F}})_4]$  (**1**)

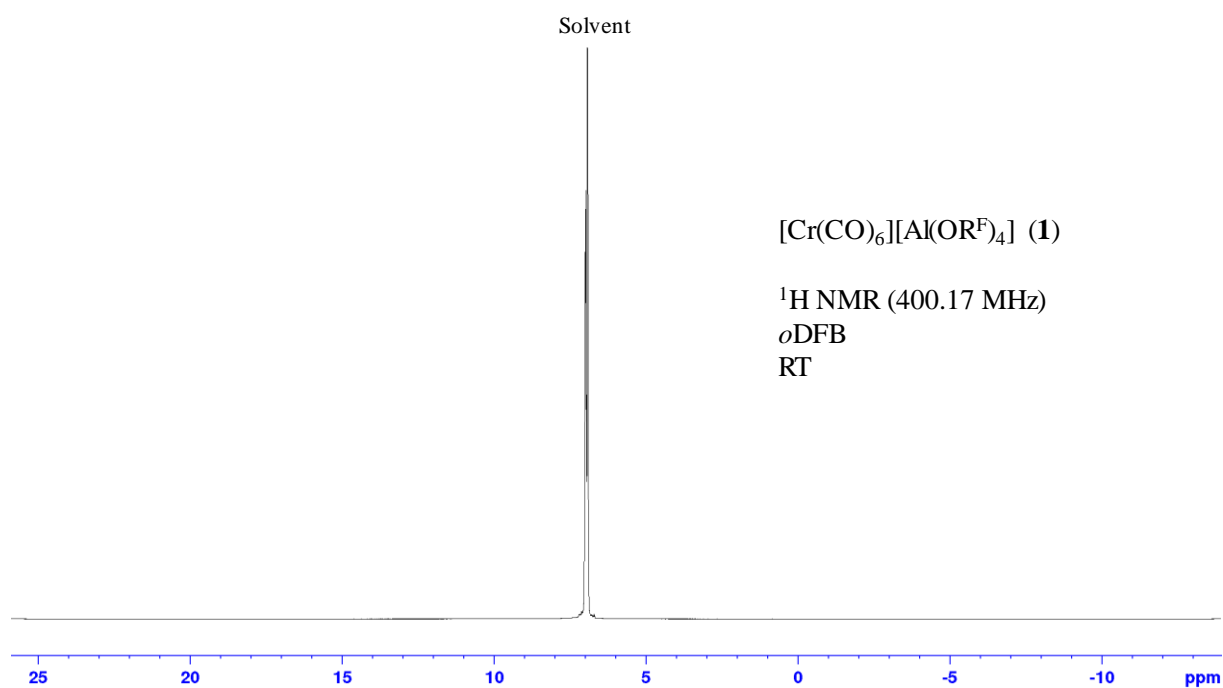

Supplementary Figure 9.  $^1\text{H}$  NMR spectrum (400.17 MHz, *o*DFB, RT) of **1**

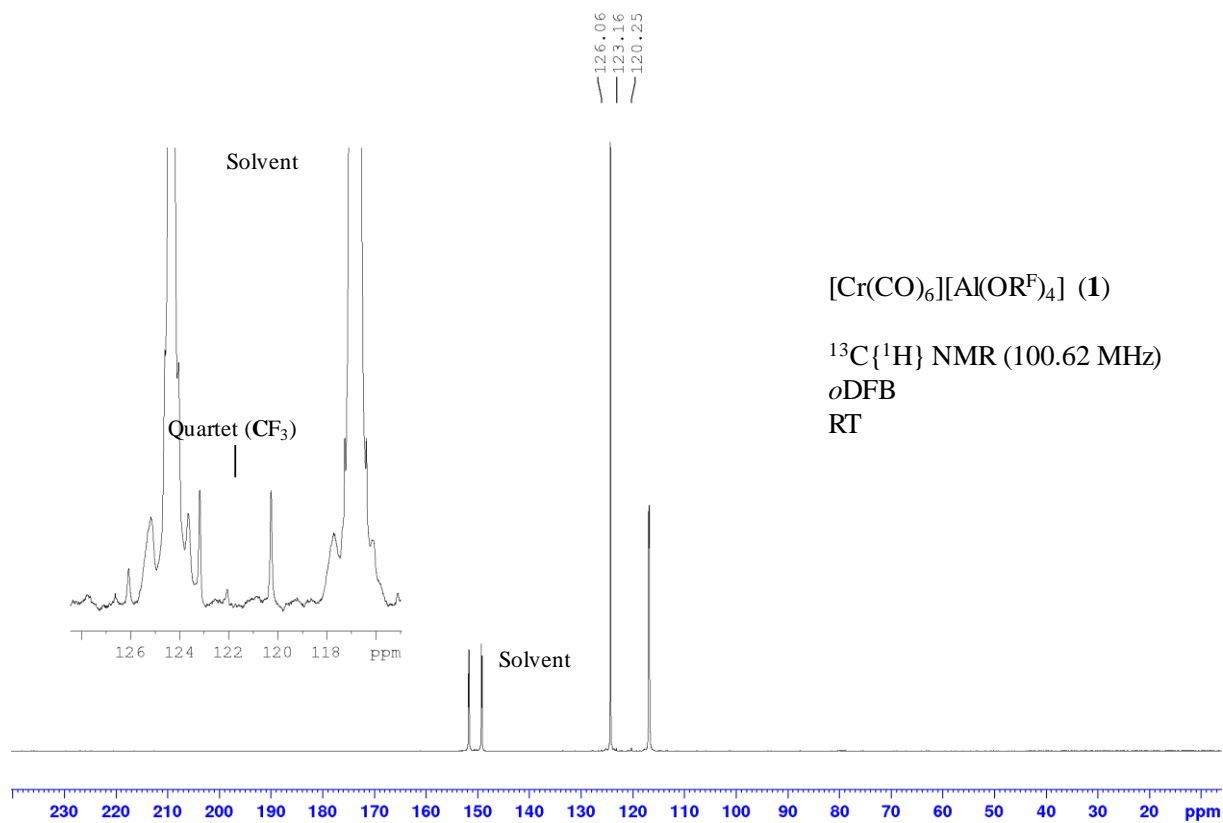

Supplementary Figure 10.  $^{13}\text{C}\{^1\text{H}\}$  NMR spectrum (100.62 MHz, *o*DFB, RT) of **1**.



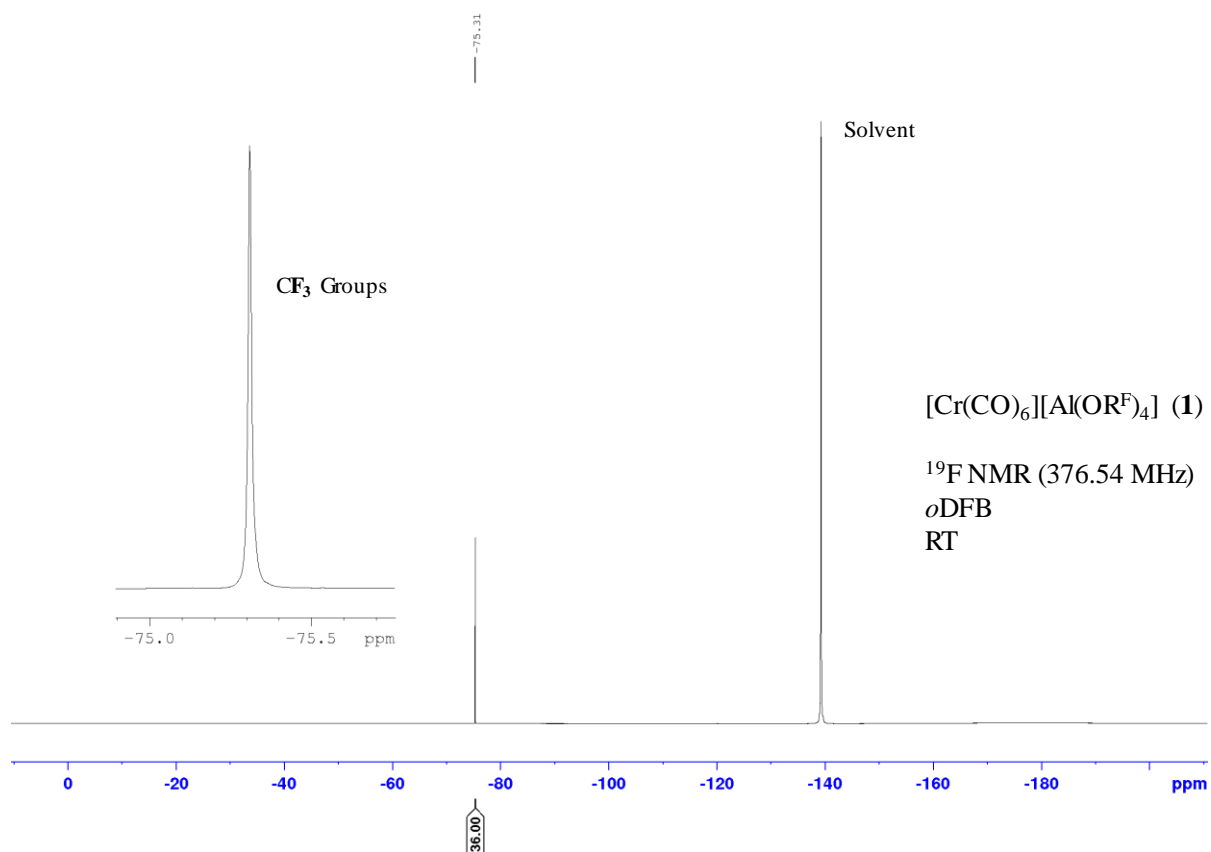

Supplementary Figure 11.  $^{19}\text{F}$  NMR spectrum (376.54 MHz, *o*DFB, RT) of **1**.

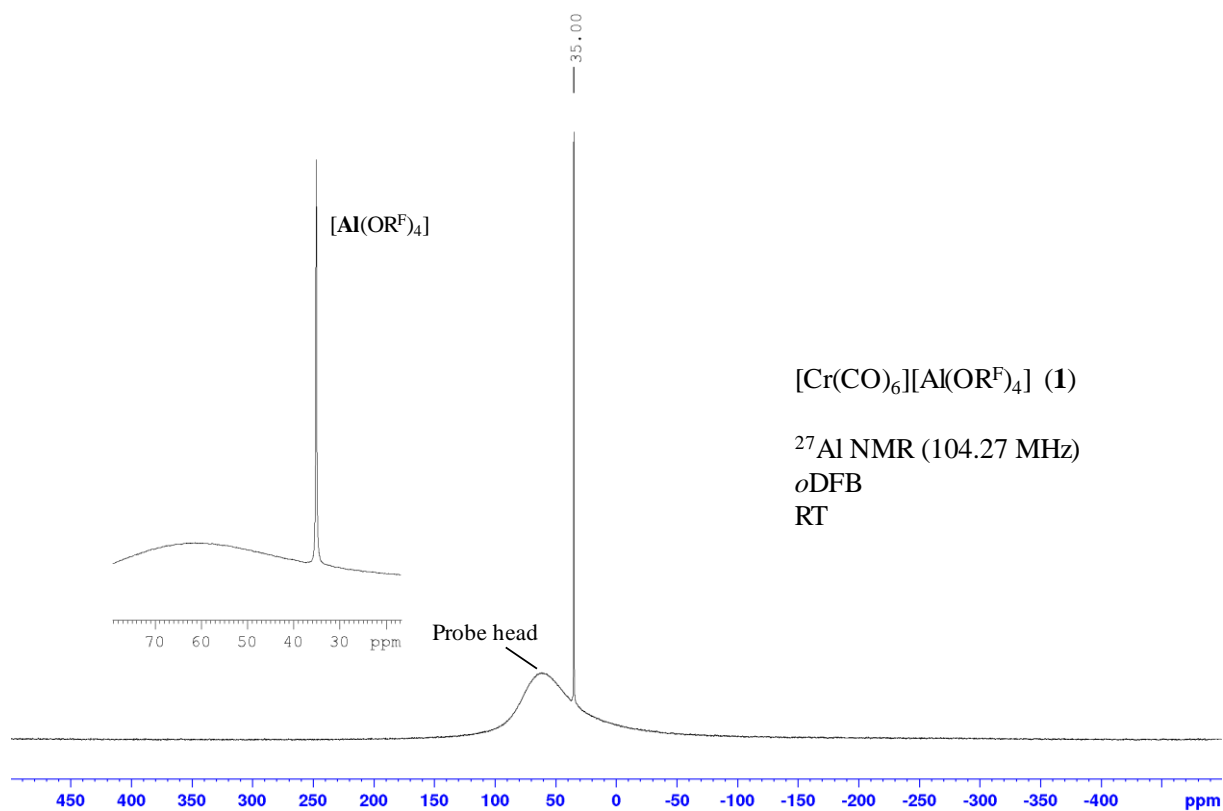

Supplementary Figure 12.  $^{27}\text{Al}$  NMR spectrum (104.27 MHz, *o*DFB, RT) of **1**.

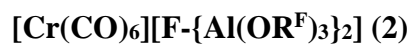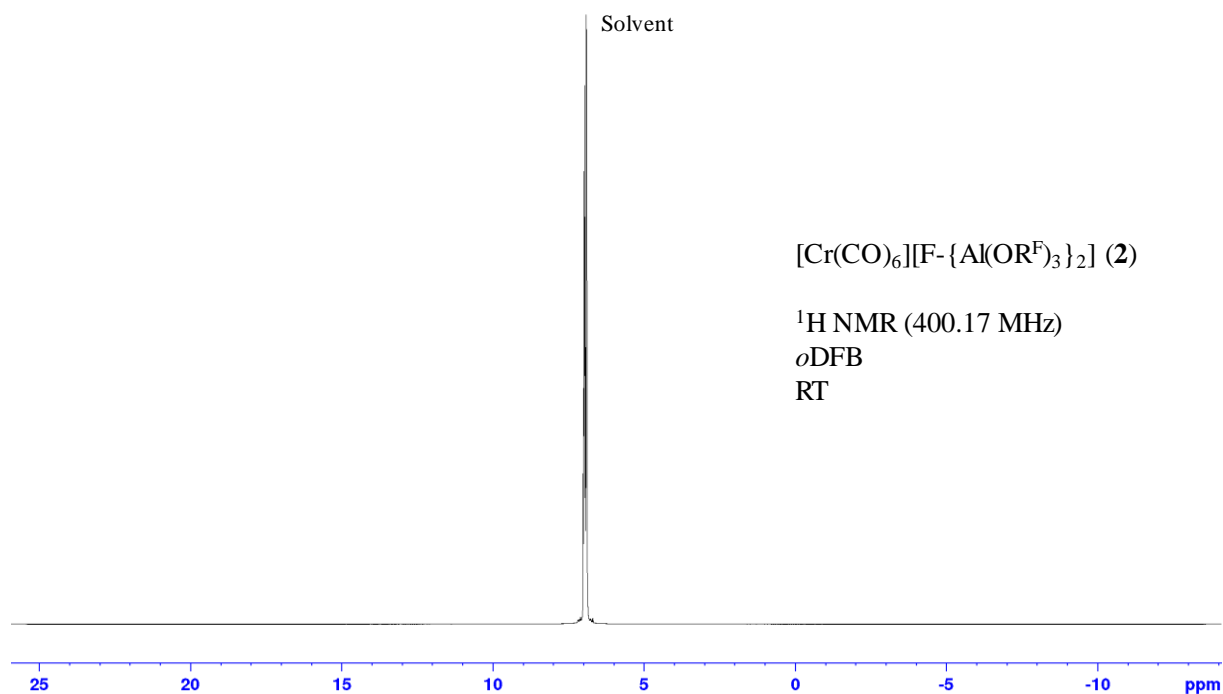

Supplementary Figure 13.  $^1\text{H}$  NMR spectrum (400.17 MHz, *o*DFB, RT) of **2**.

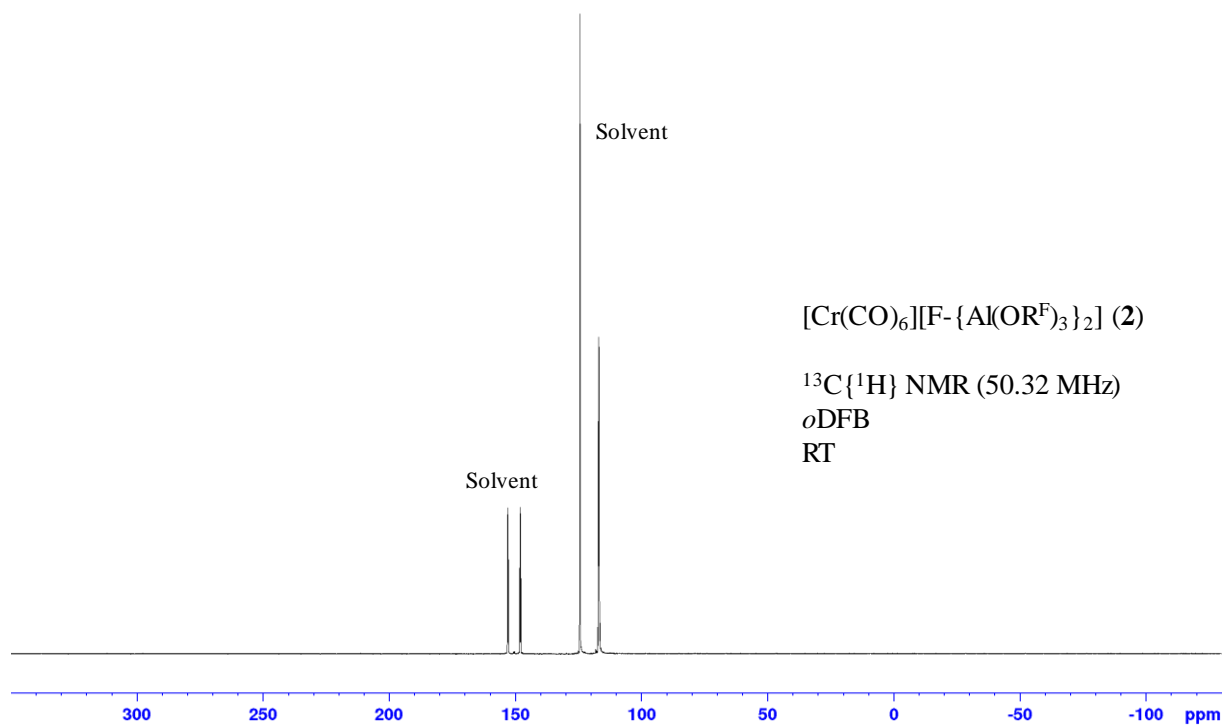

Supplementary Figure 14.  $^{13}\text{C}\{^1\text{H}\}$  NMR spectrum (50.32 MHz, *o*DFB, RT) of **2**.

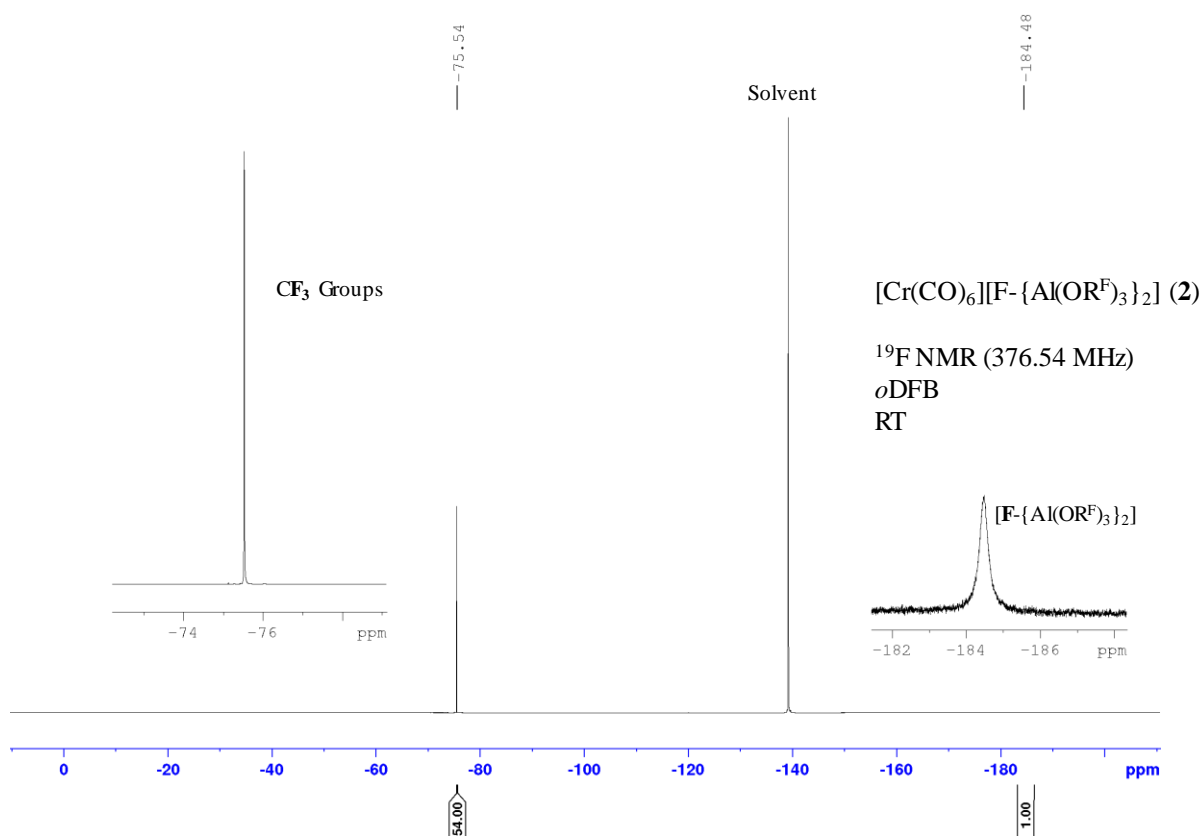

Supplementary Figure 15.  $^{19}\text{F}$  NMR spectrum (376.54 MHz, *o*DFB, RT) of **2**.

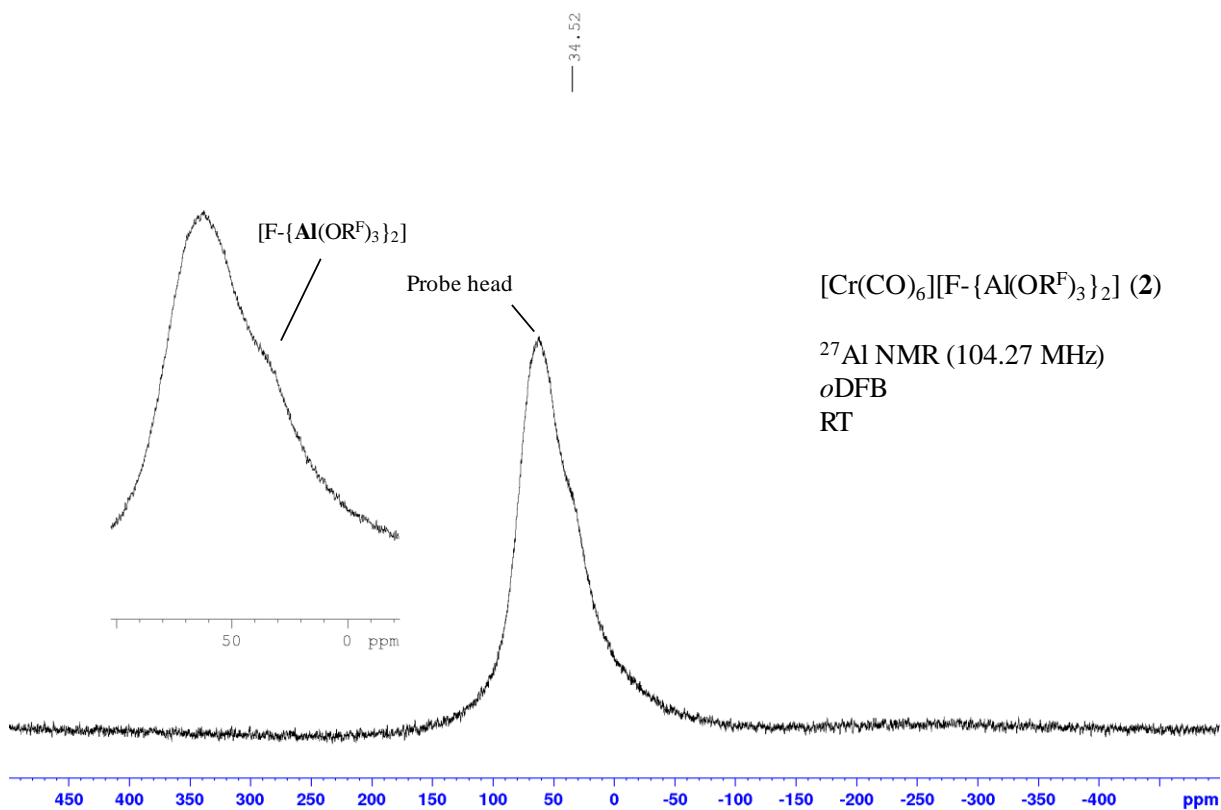

Supplementary Figure 16.  $^{27}\text{Al}$  NMR spectrum (104.27 MHz, *o*DFB, RT) of **2**.

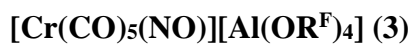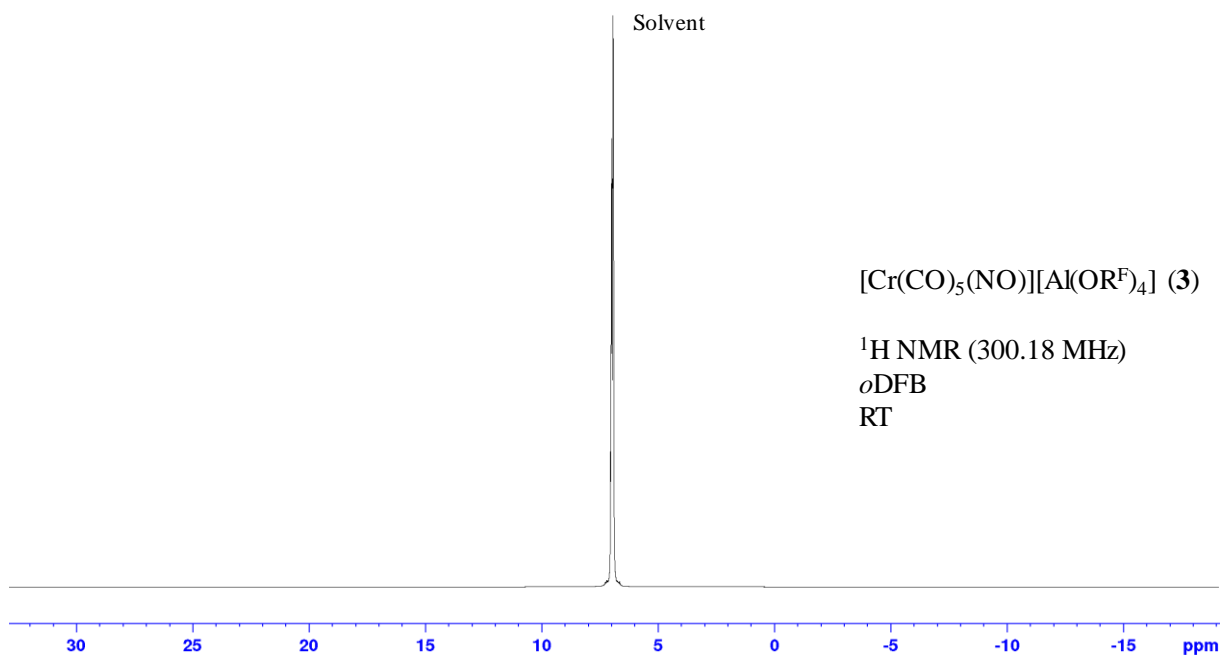

Supplementary Figure 17.  $^1\text{H}$  NMR spectrum (400.17 MHz, *o*DFB, RT) of **3**.

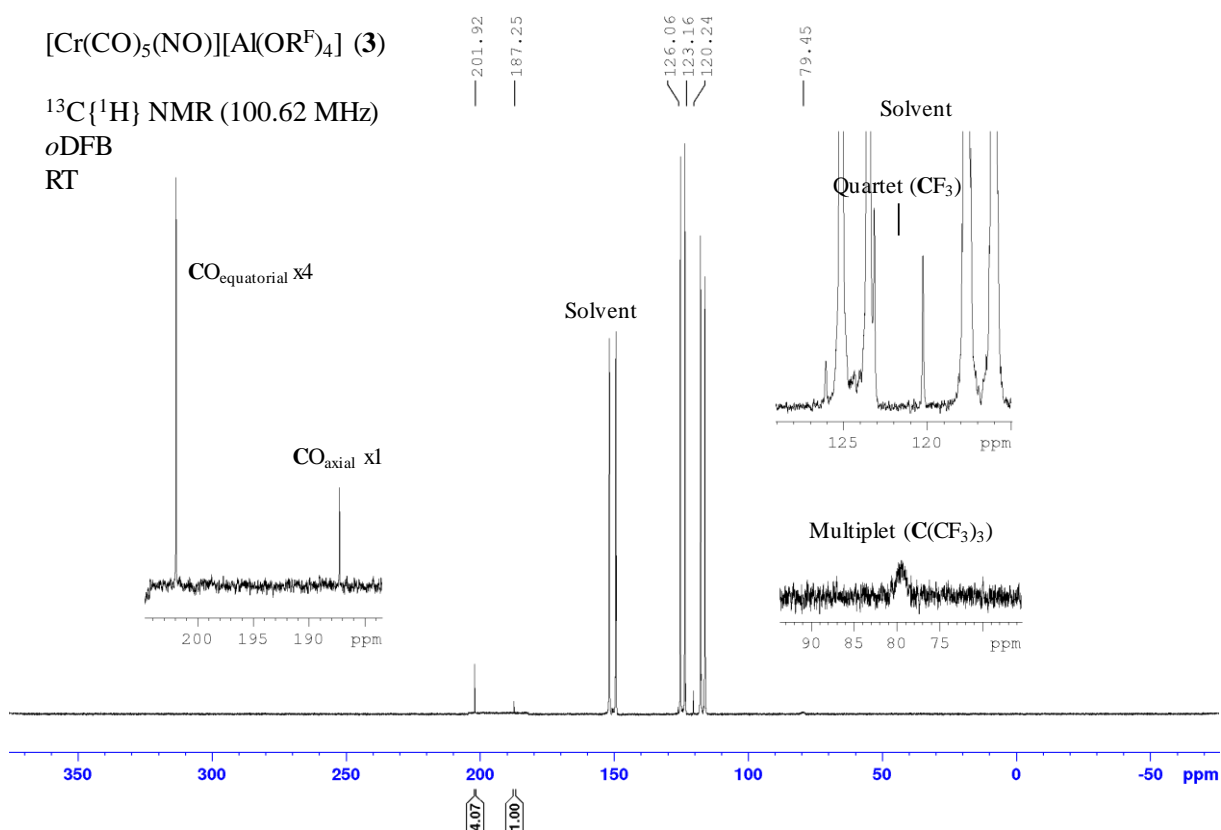

Supplementary Figure 18.  $^{13}\text{C}\{^1\text{H}\}$  NMR spectrum (100.62 MHz, *o*DFB, RT) of **3**.

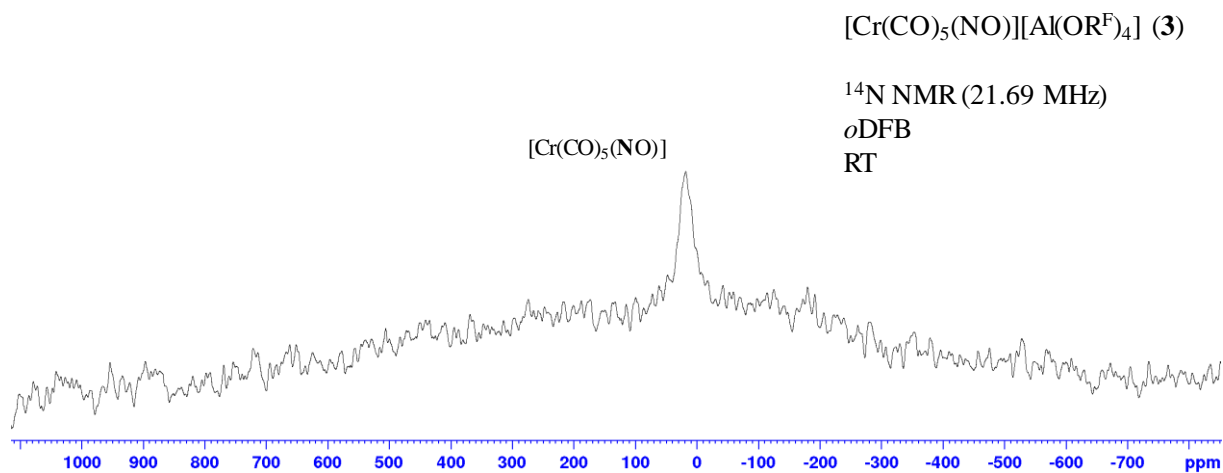

Supplementary Figure 19.  $^{14}\text{N}$  NMR spectrum (21.69 MHz, *o*DFB, RT) of **3**.

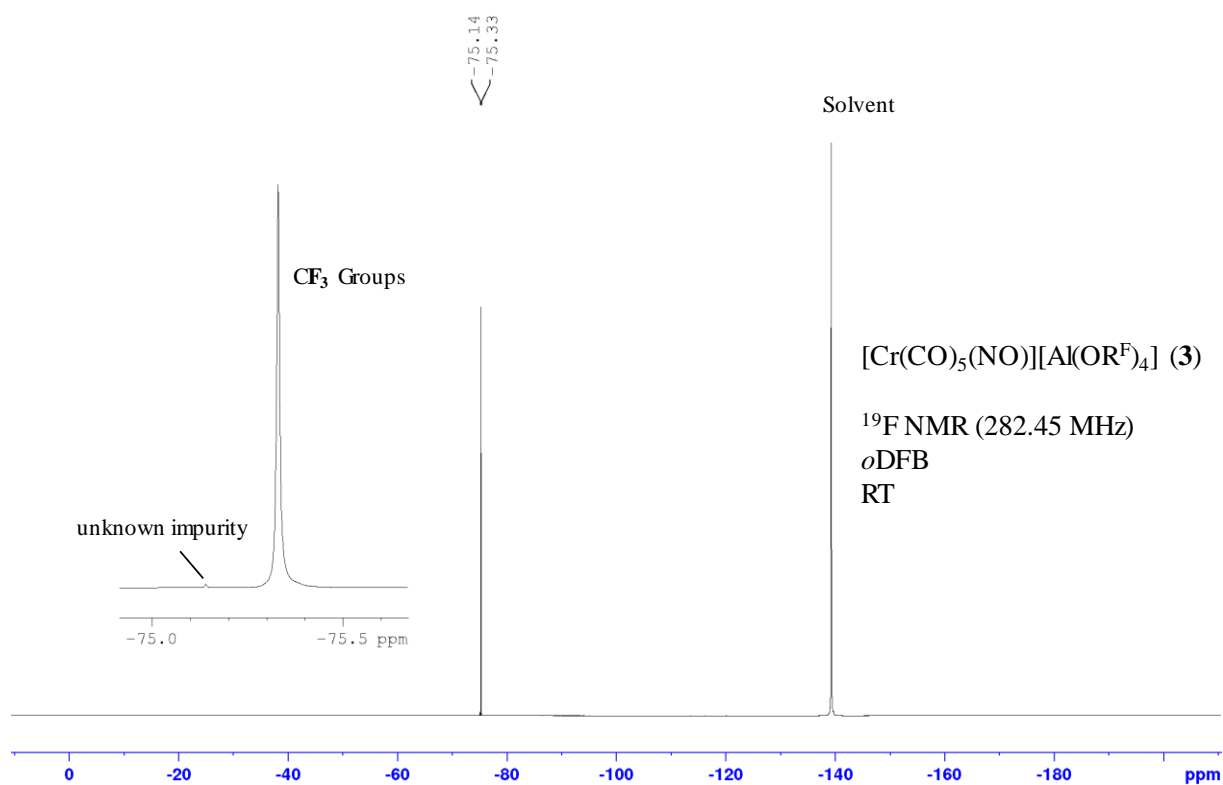

Supplementary Figure 20.  $^{19}\text{F}$  NMR spectrum (282.45 MHz, *o*DFB, RT) of **3**.

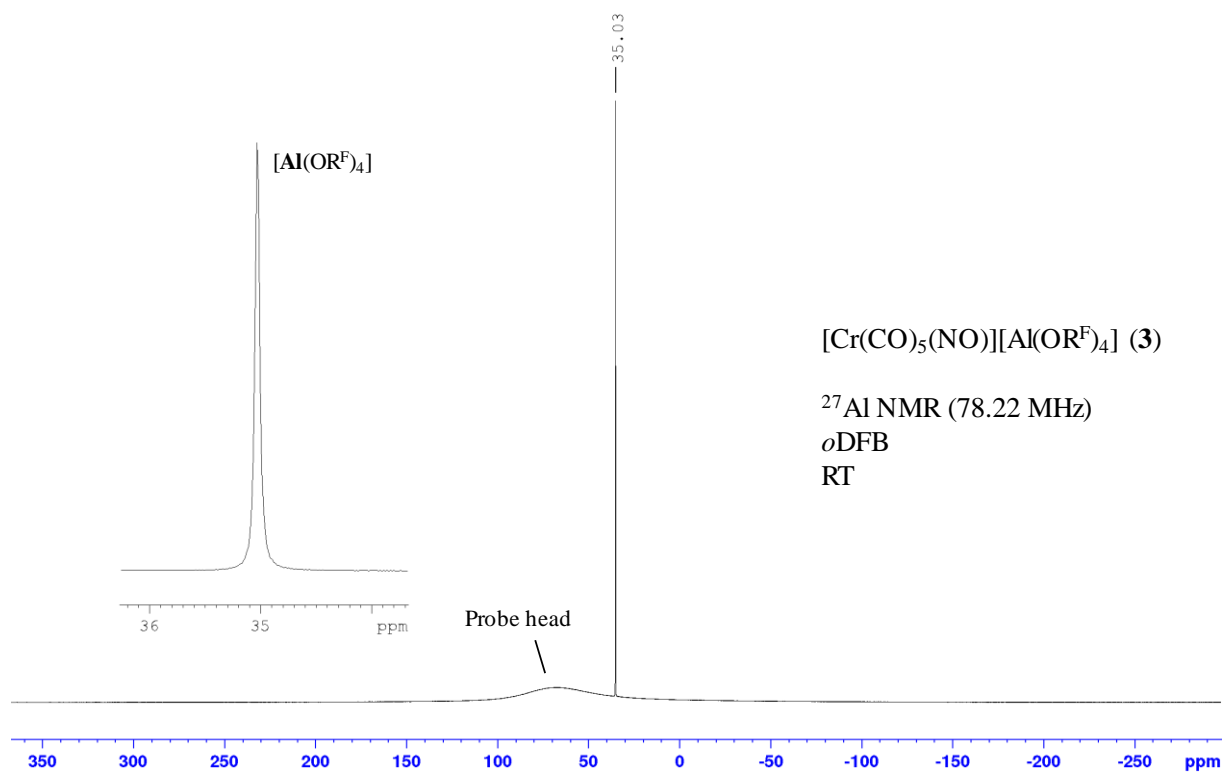

Supplementary Figure 21. <sup>27</sup>Al NMR spectrum (78.22 MHz, *o*DFB, RT) of **3**.

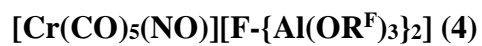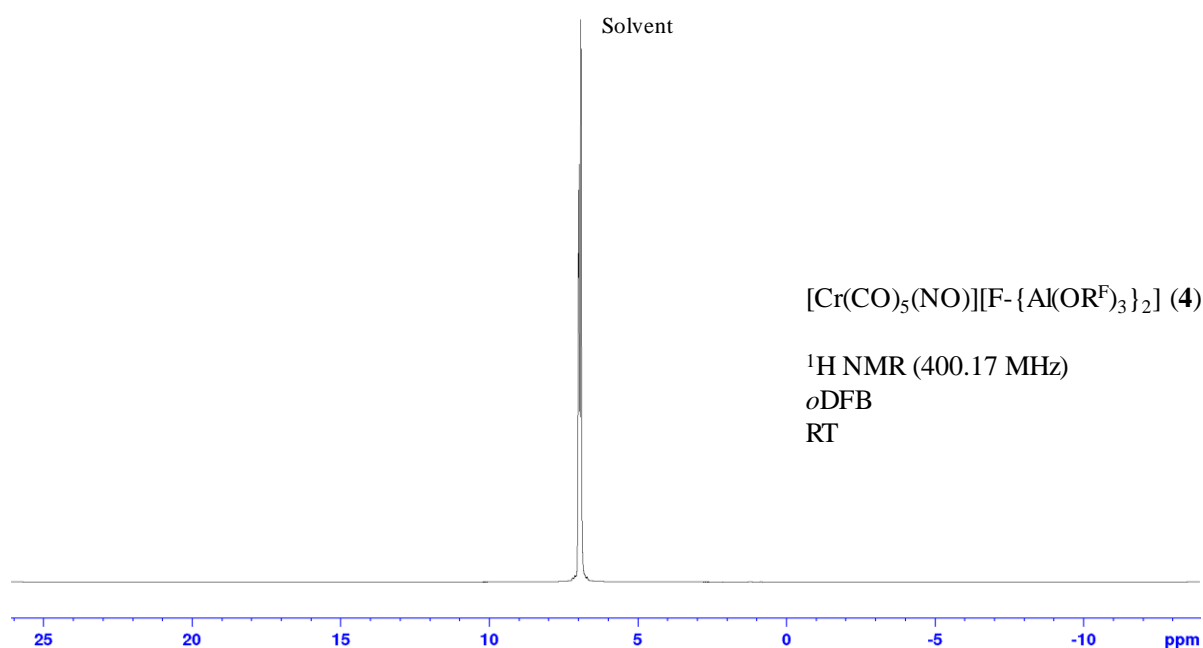

Supplementary Figure 22.  $^1\text{H}$  NMR spectrum (400.17 MHz, oDFB, RT) of **4**.

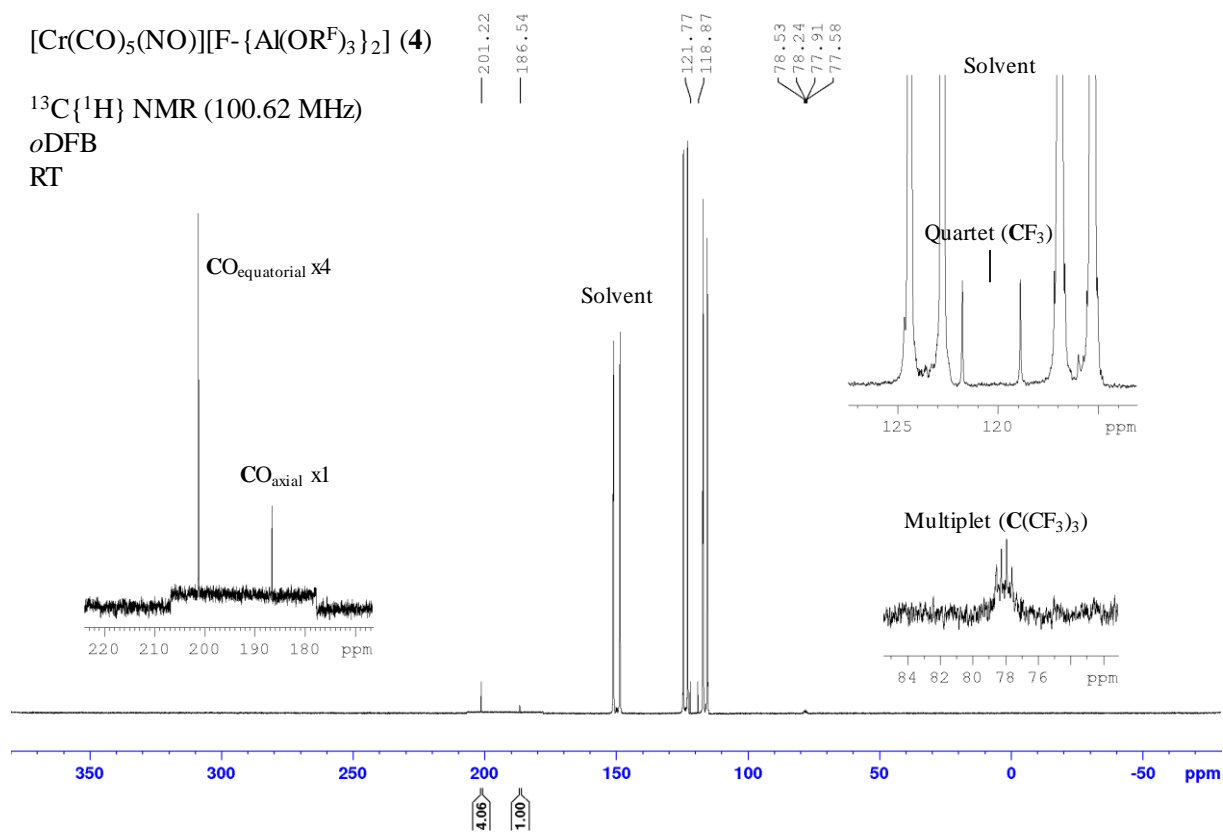

Supplementary Figure 23.  $^{13}\text{C}\{^1\text{H}\}$  NMR spectrum (100.62 MHz, oDFB, RT) of **4**.

— 22.45

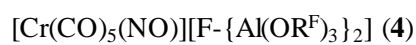

$^{14}\text{N}$  NMR (28.92 MHz)

*o*DFB

RT

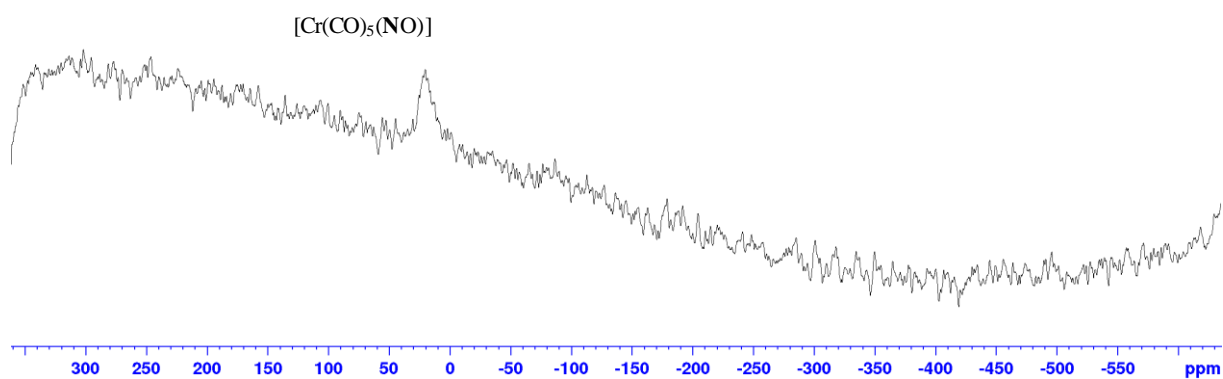

Supplementary Figure 24.  $^{14}\text{N}$  NMR spectrum (28.92 MHz, *o*DFB, RT) of **4**.

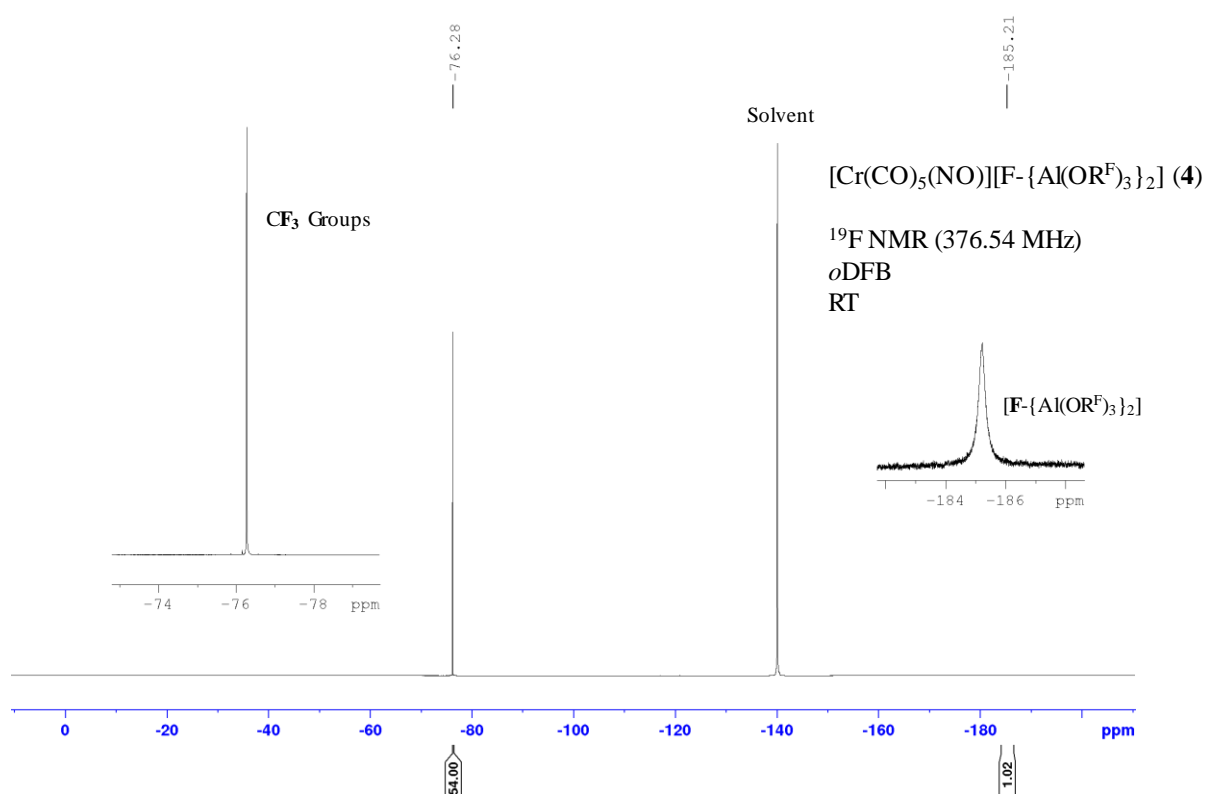

Supplementary Figure 25.  $^{19}\text{F}$  NMR spectrum (376.54 MHz, *o*DFB, RT) of **4**.



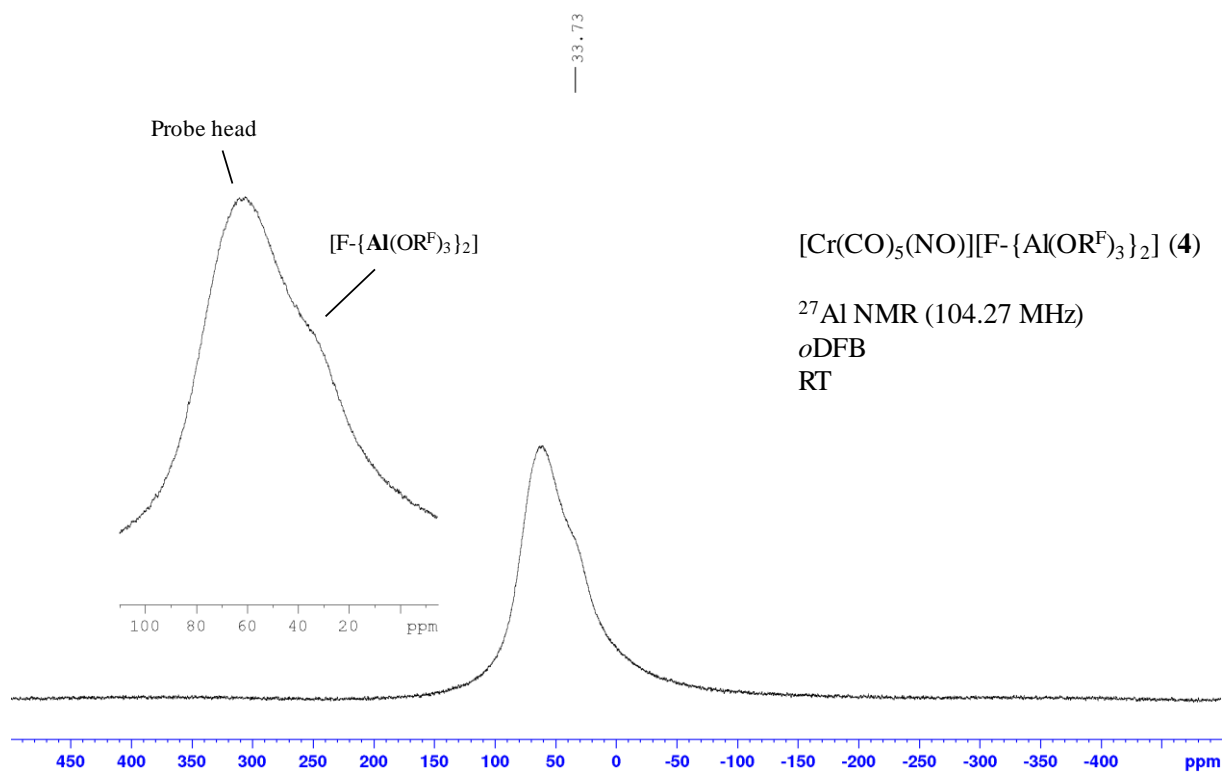

Supplementary Figure 26.  $^{27}Al$  NMR spectrum (104.27 MHz, *o*DFB, RT) of **4**.

## 6. Evans NMR Method

Paramagnetic shifts via Evans' method were measured in a 1:6 solution of CD<sub>2</sub>Cl<sub>2</sub>/1,2-F<sub>2</sub>C<sub>6</sub>H<sub>4</sub> or CH<sub>2</sub>Cl<sub>2</sub>/1,2-F<sub>2</sub>C<sub>6</sub>H<sub>4</sub> respectively with the <sup>1</sup>H NMR shift of dichloromethane (δ = 5.32 ppm) as standard in an open 3 mm thick NMR tube inside the J. Young NMR tube containing the solution of the paramagnetic substance in the same solvent mixture. The average μ<sub>eff</sub> of three different measurements was calculated. The formulae for the calculation of χ<sub>m</sub> and μ<sub>eff</sub> were taken from the literature<sup>7,8</sup> (Supplementary Equation 1).

$$\chi_m = \frac{3\Delta\nu}{4\pi\nu_0c}; \mu_{\text{eff}} = \sqrt{8T\chi_m M} \quad (1)$$

with Δν: paramagnetic shift (in Hz), ν<sub>0</sub>: spectrometer frequency (Hz), c: concentration (g<sub>substance</sub>/mL<sub>solvent</sub>), T: temperature (K), M: molar mass of the substance.

The summary of the results are shown in Supplementary Table 1, the respective NMR spectra are shown in Supplementary Figure 27 to Supplementary Figure 32.

Supplementary Table 1. Paramagnetic shifts calculated via Evans' method.

| [Cr(CO) <sub>6</sub> ][Al(OR <sup>F</sup> ) <sub>4</sub> ]<br>(1)                   | Δν<br>[Hz] | ν <sub>0</sub><br>[10 <sup>6</sup> Hz] | C<br>[g/mL] | T<br>[K] | M<br>[g/mol] | μ <sub>eff</sub><br>[μ <sub>B</sub> ] |
|-------------------------------------------------------------------------------------|------------|----------------------------------------|-------------|----------|--------------|---------------------------------------|
| <b>A</b>                                                                            | 71         | 300.17                                 | 0.04363     | 298.15   | 1187.2       | 1.91                                  |
| <b>B</b>                                                                            | 85         | 400.17                                 | 0.03387     | 298.15   | 1187.2       | 2.06                                  |
| <b>C</b>                                                                            | 112        | 300.17                                 | 0.05483     | 298.15   | 1187.2       | 2.14                                  |
| <b>Avg. μ<sub>eff</sub></b>                                                         |            |                                        |             |          |              | <b>2.04</b>                           |
| [Cr(CO) <sub>6</sub> ][F-{Al(OR <sup>F</sup> ) <sub>3</sub> ] <sub>2</sub> ]<br>(2) |            |                                        |             |          |              |                                       |
| <b>A</b>                                                                            | 90         | 300.17                                 | 0.06881     | 298.15   | 1703.2       | 2.06                                  |
| <b>B</b>                                                                            | 48         | 300.17                                 | 0.04121     | 298.15   | 1703.2       | 1.94                                  |
| <b>C</b>                                                                            | 72         | 400.17                                 | 0.03677     | 298.15   | 1703.2       | 2.18                                  |
| <b>Avg. μ<sub>eff</sub></b>                                                         |            |                                        |             |          |              | <b>2.06</b>                           |

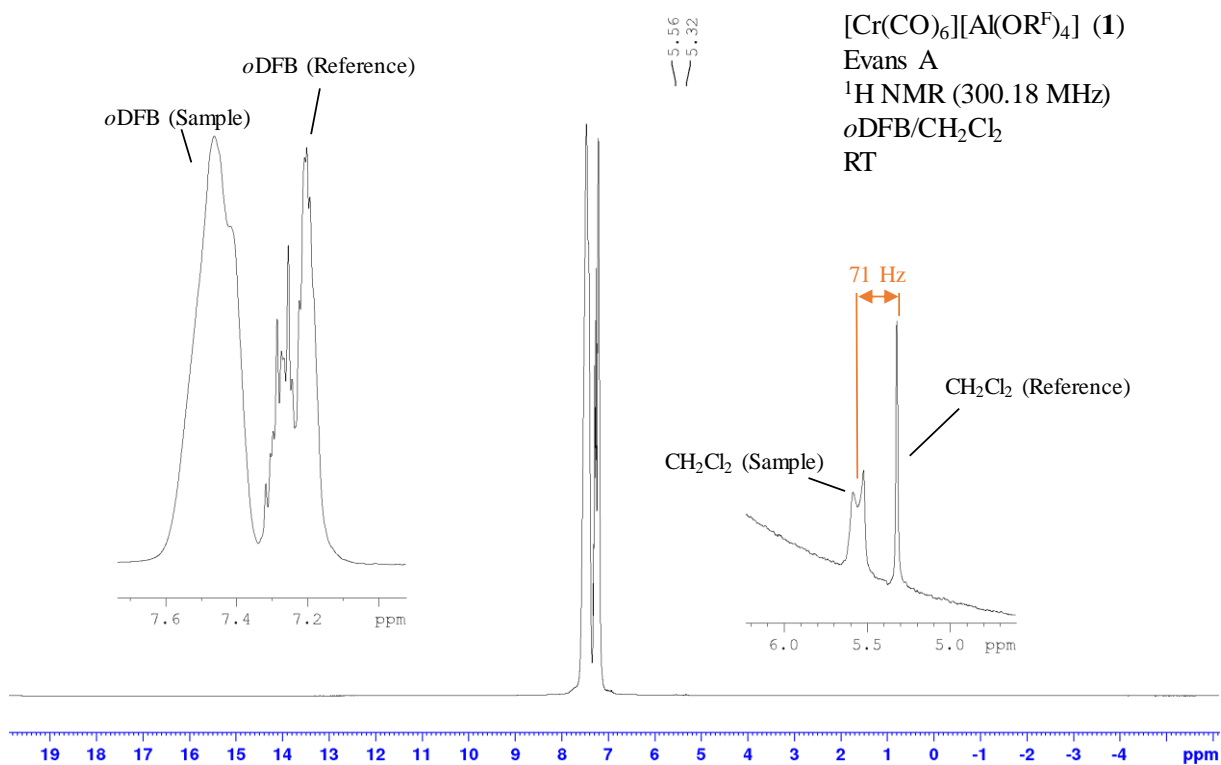

Supplementary Figure 27. Evans' measurement A:  $^1\text{H}$  NMR spectrum (300.18 MHz,  $o\text{DFB}/\text{CH}_2\text{Cl}_2$ , RT) of **1**.

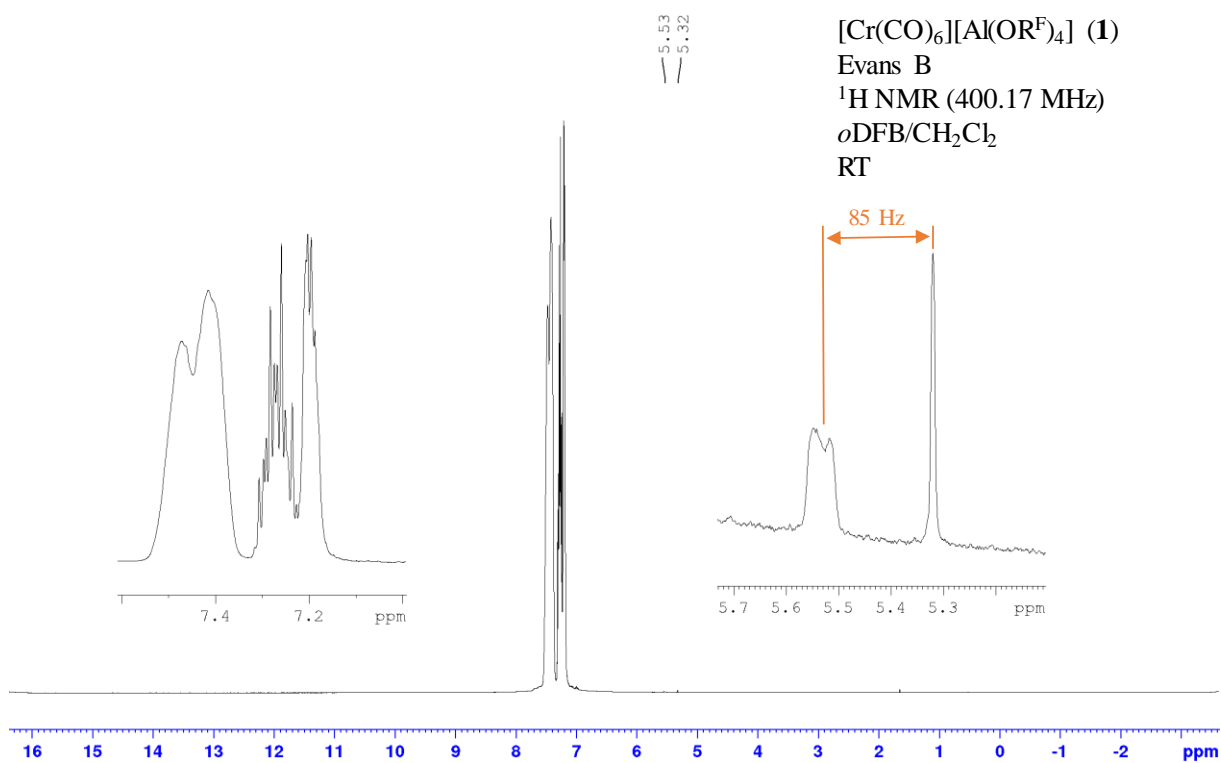

Supplementary Figure 28. Evans' measurement B:  $^1\text{H}$  NMR spectrum (400.17 MHz,  $o\text{DFB}/\text{CH}_2\text{Cl}_2$ , RT) of **1**.

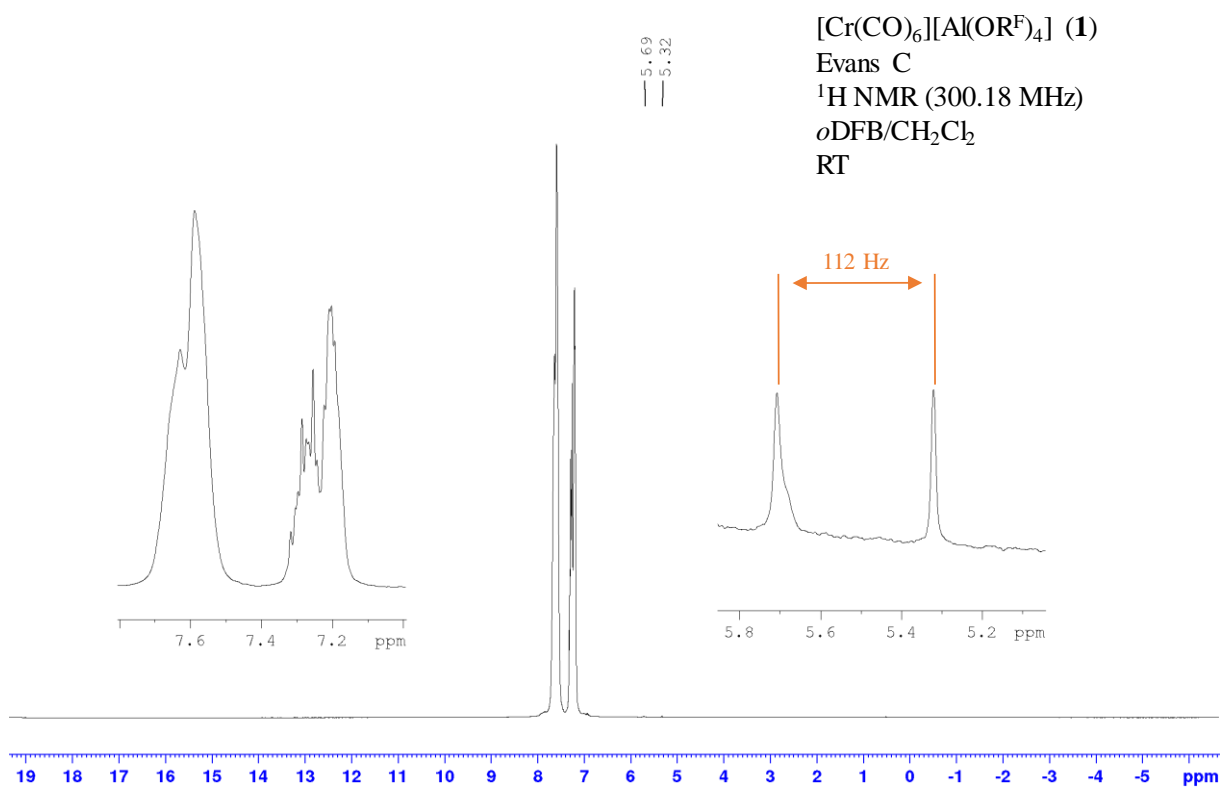

Supplementary Figure 29. Evans' measurement C:  $^1\text{H}$  NMR spectrum (300.18 MHz, *o*DFB/ $\text{CH}_2\text{Cl}_2$ , RT) of **1**.

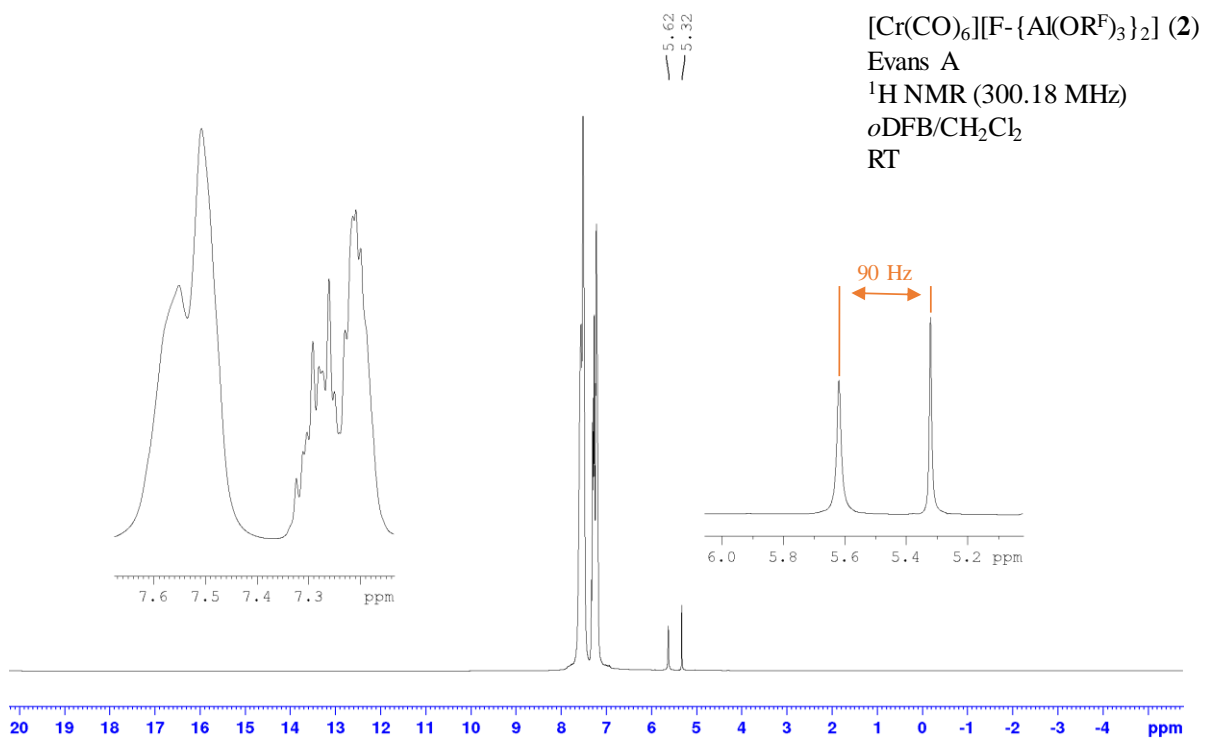

Supplementary Figure 30. Evans' measurement A:  $^1\text{H}$  NMR spectrum (300.18 MHz, *o*DFB/ $\text{CH}_2\text{Cl}_2$ , RT) of **2**.

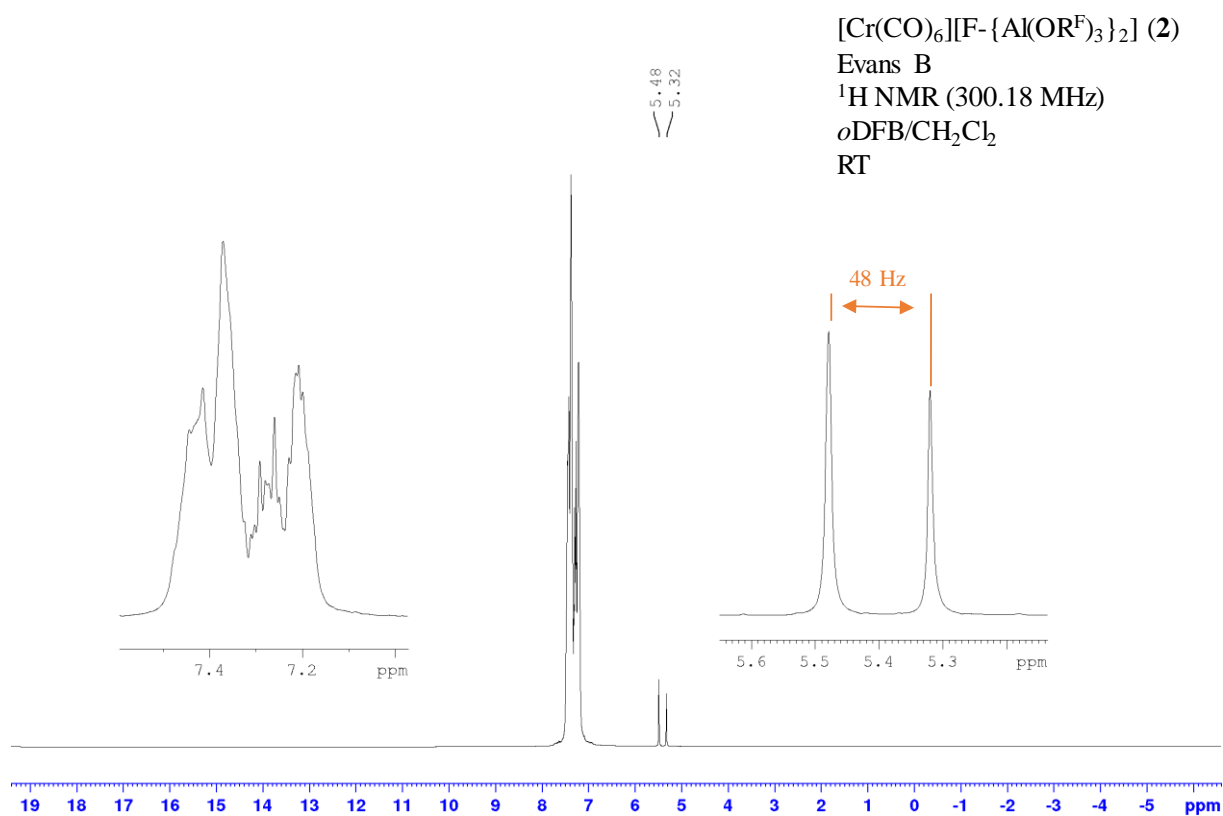

Supplementary Figure 31. Evans' measurement B:  $^1\text{H}$  NMR spectrum (300.18 MHz, *o*DFB/ $\text{CH}_2\text{Cl}_2$ , RT) of **2**.

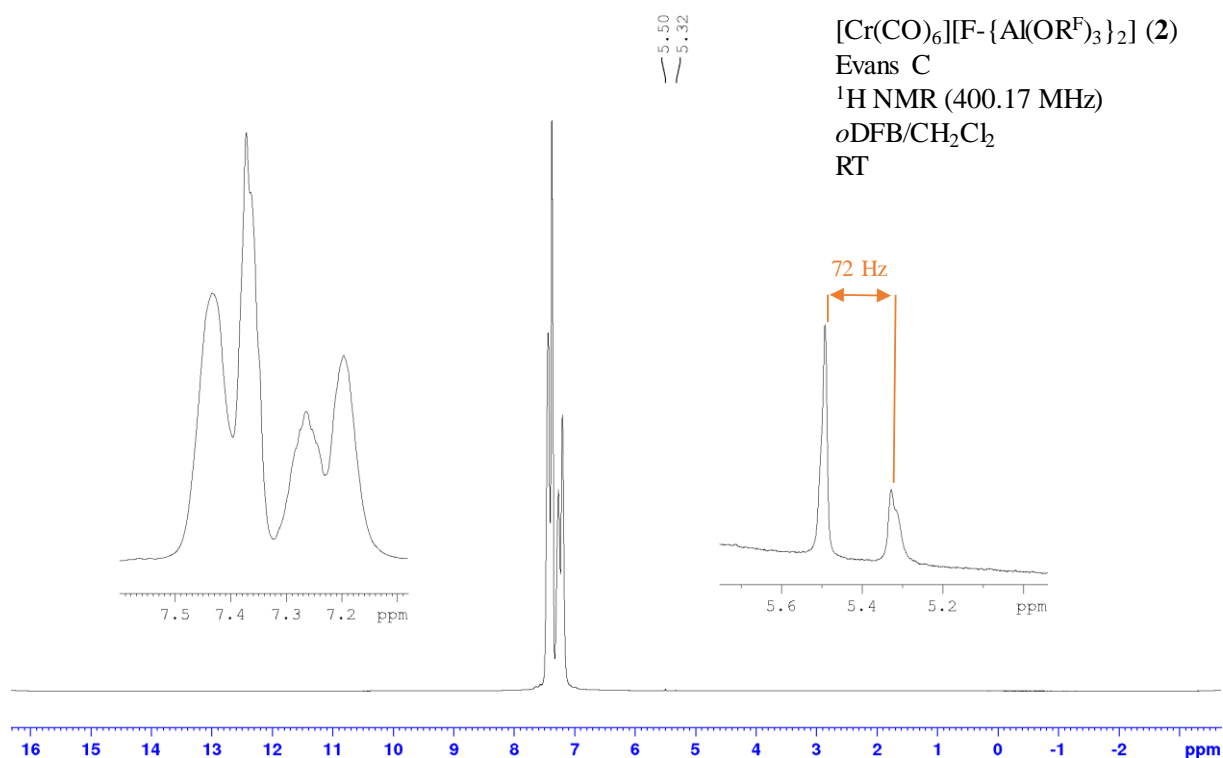

Supplementary Figure 32. Evans' measurement C:  $^1\text{H}$  NMR spectrum (400.17 MHz, *o*DFB/ $\text{CH}_2\text{Cl}_2$ , RT) of **2**.

## 7. Vibrational Analysis

The full vibrational analysis of compounds 1 to 4 is shown in Supplementary Table 2 and Supplementary Table 3.

Supplementary Table 2. Full assignment of all IR and Raman vibrations for complexes 1 and 2.

| [Cr(CO) <sub>6</sub> ][Al(OR <sup>F</sup> ) <sub>4</sub> ]<br>(1) |                         | [Cr(CO) <sub>6</sub> ]<br>[F-{Al(OR <sup>F</sup> ) <sub>3</sub> } <sub>2</sub> ]<br>(2) |                         | [Cr(CO) <sub>6</sub> ] <sup>+</sup> calcd. <sup>a)</sup> |                     | [Al(OR <sup>F</sup> ) <sub>4</sub> ] <sup>-47</sup> |           | [F-{Al(OR <sup>F</sup> ) <sub>3</sub> } <sub>2</sub> ] <sup>-48</sup> | Assignment<br>47,48                |
|-------------------------------------------------------------------|-------------------------|-----------------------------------------------------------------------------------------|-------------------------|----------------------------------------------------------|---------------------|-----------------------------------------------------|-----------|-----------------------------------------------------------------------|------------------------------------|
| IR                                                                | Raman                   | IR                                                                                      | Raman                   | IR <sup>b)</sup>                                         | Raman <sup>b)</sup> | IR                                                  | Raman     | IR                                                                    |                                    |
|                                                                   |                         |                                                                                         |                         |                                                          | 85 (10)             |                                                     |           |                                                                       | <i>E<sub>g</sub></i>               |
|                                                                   | 173 (v <sub>vw</sub> )  |                                                                                         |                         |                                                          |                     |                                                     | -         |                                                                       | -                                  |
|                                                                   | 234 (v <sub>vw</sub> )  |                                                                                         | 234 (v <sub>vw</sub> )  |                                                          |                     |                                                     | 233 (w)   |                                                                       | -                                  |
|                                                                   | 288 (w)                 |                                                                                         | 291 (v <sub>w</sub> )   |                                                          |                     |                                                     | 291 (w)   |                                                                       | C-C                                |
|                                                                   | 332 (m)                 |                                                                                         | 328 (ms)                |                                                          |                     |                                                     | 322 (s)   |                                                                       | C-C, Al-O                          |
|                                                                   |                         |                                                                                         |                         |                                                          | 356 (25)            |                                                     |           |                                                                       | <i>A<sub>1g</sub></i>              |
|                                                                   | 368 (v <sub>vw</sub> )  |                                                                                         | 370 (v <sub>w</sub> )   |                                                          |                     |                                                     | 369 (w)   |                                                                       | C-C, C-F, Al-O                     |
|                                                                   |                         |                                                                                         |                         | 391 (15)                                                 |                     |                                                     |           |                                                                       | <i>E<sub>u</sub></i>               |
|                                                                   |                         |                                                                                         |                         | 526 (85)                                                 |                     |                                                     |           |                                                                       | <i>A<sub>2u</sub></i>              |
|                                                                   | 538 (v <sub>w</sub> )   |                                                                                         | 539 (v <sub>w</sub> )   |                                                          |                     |                                                     | 538 (mw)  |                                                                       | C-C, C-O                           |
| 560 (v <sub>w</sub> )                                             | 563 (v <sub>vw</sub> )  |                                                                                         |                         |                                                          |                     | 559 (mw)                                            | 561 (w)   |                                                                       | Al-O, C-C                          |
|                                                                   |                         |                                                                                         |                         |                                                          |                     |                                                     |           |                                                                       |                                    |
| 571 (v <sub>vw</sub> )                                            | 572 (v <sub>vw</sub> )  | 568 (v <sub>w</sub> )                                                                   | 571 (v <sub>w</sub> )   |                                                          |                     | 573 (w)                                             | 572 (w)   | 572 (m)                                                               | Al-O, C-C                          |
|                                                                   |                         |                                                                                         |                         | 621 (126)                                                |                     |                                                     |           |                                                                       | <i>E<sub>u</sub></i>               |
|                                                                   |                         | 639 (w)                                                                                 |                         |                                                          |                     |                                                     |           | 639 (m)                                                               | Al-F-Al                            |
| 726 (v <sub>vs</sub> )                                            |                         | 726 (v <sub>vs</sub> )                                                                  |                         |                                                          |                     | 726 (ms)                                            | -         | 728 (s)                                                               | C-C, C-O                           |
|                                                                   | 747 (w)                 | 751 (v <sub>vw</sub> )                                                                  | 753 (ms)                |                                                          |                     |                                                     | 744 (ms)  | -                                                                     | -                                  |
| 756 (v <sub>vw</sub> )                                            |                         | 760 (v <sub>vw</sub> )                                                                  |                         |                                                          |                     | 755 (w)                                             | -         | -                                                                     | C-C, C-O                           |
|                                                                   | 798 (w)                 |                                                                                         |                         |                                                          |                     |                                                     | 799 (ms)  |                                                                       | -                                  |
|                                                                   |                         |                                                                                         | 818 (v <sub>w</sub> )   |                                                          |                     |                                                     |           |                                                                       | -                                  |
| 831 (v <sub>w</sub> )                                             |                         |                                                                                         |                         |                                                          |                     | 830 (m)                                             |           |                                                                       | Al-O, C-C                          |
|                                                                   |                         | 865 (w)                                                                                 |                         |                                                          |                     | -                                                   | -         | 865 (w)                                                               | Al-O, Al-F-Al                      |
| 969 (v <sub>vs</sub> )                                            | 977 (v <sub>vw</sub> )  | 972 (v <sub>vs</sub> )                                                                  | 980 (v <sub>vw</sub> )  |                                                          |                     | 975 (vs)                                            | 975 (mw)  | 975 (s)                                                               | C-C, C-F                           |
|                                                                   |                         |                                                                                         | 1131 (v <sub>vw</sub> ) |                                                          |                     | -                                                   | 1133 (mw) |                                                                       | C-C, C-F                           |
| 1161 (ms)                                                         | 1163 (v <sub>vw</sub> ) |                                                                                         |                         |                                                          |                     | -                                                   | -         |                                                                       |                                    |
|                                                                   |                         | 1184 (s)                                                                                | 1180 (v <sub>vw</sub> ) |                                                          |                     | 1176 (ms)                                           | 1173 (mw) |                                                                       |                                    |
|                                                                   |                         |                                                                                         |                         |                                                          |                     | -                                                   | -         | 1183 (m)                                                              | C-C, C-F                           |
| 1208 (v <sub>vs</sub> )                                           |                         | 1216 (v <sub>vs</sub> )                                                                 |                         |                                                          |                     | 1223 (vs)                                           |           | 1218 (s)                                                              | C-C, C-F                           |
| 1239 (s)                                                          | 1235 (v <sub>vw</sub> ) | 1247 (v <sub>vs</sub> )                                                                 | 1244 (v <sub>vw</sub> ) |                                                          |                     | 1236 (vs)                                           | 1237 (mw) | 1249 (s)                                                              | C-C, C-F                           |
| 1272 (ms)                                                         | 1272 (v <sub>vw</sub> ) |                                                                                         | 1281 (v <sub>vw</sub> ) |                                                          |                     | 1274 (s)                                            | 1276 (mw) | 1268 (m)                                                              | C-C, C-F                           |
| 1298 (mw)                                                         | 1304 (v <sub>vw</sub> ) | 1300 (mw)                                                                               | 1304 (v <sub>vw</sub> ) |                                                          |                     | 1299 (s)                                            | -         | 1301 (m)                                                              | C-C, C-F                           |
| 1352 (v <sub>w</sub> )                                            |                         | 1355 (v <sub>w</sub> )                                                                  |                         |                                                          |                     | 1349 (ms)                                           | 1353 (w)  | 1355 (m)                                                              | C-C, C-F                           |
| <del>1508 (v<sub>vw</sub>)</del>                                  |                         | <del>1509 (v<sub>vw</sub>)</del>                                                        |                         |                                                          |                     |                                                     |           |                                                                       | <i>o</i> DFB                       |
| <del>1843 (v<sub>vw</sub>)</del>                                  |                         | <del>1841 (v<sub>vw</sub>)</del>                                                        |                         |                                                          |                     |                                                     |           |                                                                       | <i>v</i> N-O <i>A<sub>1</sub></i>  |
|                                                                   | 2128 (br, vs)           |                                                                                         | 2126 (br, vs)           |                                                          | 2074 (413)          |                                                     |           |                                                                       | <i>v</i> C-O <i>E<sub>g</sub></i>  |
| 2094 (s)                                                          |                         | 2096 (s)                                                                                |                         | 2081 (999)                                               |                     |                                                     |           |                                                                       | <i>v</i> C-O <i>E<sub>u</sub></i>  |
|                                                                   |                         |                                                                                         |                         | 2084 (816)                                               |                     |                                                     |           |                                                                       | <i>v</i> C-O <i>A<sub>2u</sub></i> |
|                                                                   | 2175 (s)                |                                                                                         | 2173 (s)                |                                                          | 2157 (208)          |                                                     |           |                                                                       | <i>v</i> C-O <i>A<sub>1g</sub></i> |

<sup>a)</sup> BP86-D3BJ/def2-TZVPP, *D*<sub>3d</sub> symmetry, no scale factor was applied. w: weak, m: medium, s: strong, v: very, sh: shoulder. <sup>b)</sup> Raman and IR intensities were calculated with the Gaussian software. The assignments of the respective anion bands and their intensities are based on [N(Bu)<sub>4</sub>][Al(OR<sup>F</sup>)<sub>4</sub>] (IR and Raman) in ref.<sup>47</sup> and [CBR<sub>3</sub>][F-{Al(OR<sup>F</sup>)<sub>3</sub>}<sub>2</sub>] (IR only) in ref.<sup>48</sup>. The characteristic IR bands that are suited best for differentiation between [Al(OR<sup>F</sup>)<sub>4</sub>]<sup>-</sup> and [F-{Al(OR<sup>F</sup>)<sub>3</sub>}<sub>2</sub>]<sup>-</sup> are given in italics; in Raman spectroscopy, the difference is subtler and shows best in the (roughly) 1:1 intensity of the bands at 747 and 798 cm<sup>-1</sup> ([Al(OR<sup>F</sup>)<sub>4</sub>]<sup>-</sup>) compared to a (roughly) 1:3 intensity for the bands at 753 and 818 cm<sup>-1</sup> ([F-{Al(OR<sup>F</sup>)<sub>3</sub>}<sub>2</sub>]<sup>-</sup>).

Bands of trace impurities are ~~crossed out~~: 1843/1841 cm<sup>-1</sup> belongs to traces of the [Cr(CO)<sub>5</sub>(NO)]<sup>+</sup> cation, 1508/1509 cm<sup>-1</sup> belongs to traces of *o*DFB. Note that the Cr-C vibrations cannot be assigned unambiguously due to overlap with the anion bands.

The plots of the calculated IR and Raman spectra for [Cr(CO)<sub>6</sub>]<sup>+</sup> are shown in Supplementary Figure 38 and Supplementary Figure 39.

Supplementary Table 3. Full assignment of all IR and Raman vibrations for complexes **3** and **4**.

| [Cr(CO) <sub>5</sub> (NO)]<br>[Al(OR <sup>F</sup> ) <sub>4</sub> ]<br>( <b>3</b> ) |            | [Cr(CO) <sub>5</sub> (NO)]<br>[F-{Al(OR <sup>F</sup> ) <sub>3</sub> } <sub>2</sub> ]<br>( <b>4</b> ) |            | [Cr(CO) <sub>5</sub> (NO)] <sup>+</sup> calcd. <sup>b)</sup> |            | [Al(OR <sup>F</sup> ) <sub>4</sub> ] <sup>-47</sup> |           | [F-{Al(OR <sup>F</sup> ) <sub>3</sub> } <sub>2</sub> ] <sup>-48</sup> |  | Assignment <sup>47,48</sup>                  |
|------------------------------------------------------------------------------------|------------|------------------------------------------------------------------------------------------------------|------------|--------------------------------------------------------------|------------|-----------------------------------------------------|-----------|-----------------------------------------------------------------------|--|----------------------------------------------|
| IR                                                                                 | Raman      | IR                                                                                                   | Raman      | IR                                                           | Raman      | IR                                                  | Raman     | IR                                                                    |  |                                              |
|                                                                                    |            |                                                                                                      |            |                                                              | 89 (10)    |                                                     |           |                                                                       |  | B <sub>1</sub>                               |
|                                                                                    |            |                                                                                                      |            |                                                              | 93 (10)    |                                                     |           |                                                                       |  | E                                            |
|                                                                                    | 234 (vvw)  |                                                                                                      | 233 (vvw)  |                                                              |            |                                                     | 233 (w)   |                                                                       |  | -                                            |
|                                                                                    | 290 (vvw)  |                                                                                                      | 293 (vvw)  |                                                              |            |                                                     | -         |                                                                       |  | -                                            |
|                                                                                    |            |                                                                                                      |            |                                                              |            |                                                     | 291 (w)   |                                                                       |  | C-C                                          |
|                                                                                    | 332 (vw)   |                                                                                                      | 332 (vw)   |                                                              |            |                                                     | 322 (s)   |                                                                       |  | C-C, Al-O                                    |
|                                                                                    |            |                                                                                                      |            |                                                              | 351 (10)   |                                                     |           |                                                                       |  | A <sub>1</sub>                               |
|                                                                                    |            |                                                                                                      |            |                                                              |            |                                                     | 367 (20)  |                                                                       |  | A <sub>1</sub>                               |
|                                                                                    | 369 (vvw)  |                                                                                                      | 370 (vvw)  |                                                              |            |                                                     | 369 (w)   |                                                                       |  | C-C, C-F, Al-O                               |
|                                                                                    |            |                                                                                                      |            |                                                              | 417 (22)   |                                                     |           |                                                                       |  | E                                            |
|                                                                                    | 487 (vvw)  |                                                                                                      | 487 (vvw)  |                                                              | 504 (16)   |                                                     | -         |                                                                       |  | vCr-N A <sub>1</sub>                         |
|                                                                                    |            |                                                                                                      |            |                                                              | 532 (26)   |                                                     |           |                                                                       |  | E                                            |
|                                                                                    | 539 (vvw)  |                                                                                                      | 539 (vvw)  |                                                              |            |                                                     | 538 (mw)  |                                                                       |  | C-C, C-O                                     |
| 561 (vw)                                                                           | 562 (vvw)  | 568 (vw)                                                                                             |            |                                                              |            | 559 (mw)                                            | 561 (w)   | 572 (m)                                                               |  | Al-O, C-C                                    |
| 571 (vww)                                                                          |            |                                                                                                      | 572 (vww)  |                                                              |            | 573 (w)                                             | 572 (w)   |                                                                       |  | Al-O, C-C                                    |
| 640 (vw)                                                                           | 640 (vw)   | <sup>8</sup> 638 (mw)                                                                                | 639 (vw)   | 660 (133)                                                    | 660 (19)   | -                                                   | -         | 639 (m)                                                               |  | vCr-N A <sub>1</sub> ; Al-F-Al ( <b>4</b> )  |
| 657 (w)                                                                            |            | 657 (w)                                                                                              |            | 693 (99)                                                     |            | -                                                   | -         | -                                                                     |  | δ Cr-C E                                     |
| 727 (vs)                                                                           |            | 727 (vvs)                                                                                            |            |                                                              |            | 726 (ms)                                            | -         | 728 (s)                                                               |  | C-C, C-O                                     |
|                                                                                    | 747 (vw)   |                                                                                                      | 753 (w)    |                                                              |            | -                                                   | 744 (ms)  | -                                                                     |  | -                                            |
| 756 (vww)                                                                          |            | 760 (vww)                                                                                            |            |                                                              |            | 755 (w)                                             | -         | -                                                                     |  | C-C, C-O                                     |
|                                                                                    | 797 (vw)   |                                                                                                      |            |                                                              |            | -                                                   | 799 (ms)  | -                                                                     |  | -                                            |
|                                                                                    |            |                                                                                                      | 818 (vww)  |                                                              |            |                                                     |           | -                                                                     |  | -                                            |
| 832 (vw)                                                                           |            |                                                                                                      |            |                                                              |            | 830 (m)                                             | -         | -                                                                     |  | Al-O, C-C                                    |
| 866 (vww)                                                                          |            | 865 (w)                                                                                              |            |                                                              |            | -                                                   | -         | 865 (w)                                                               |  | Al-O, Al-F-Al                                |
| 971 (vvs)                                                                          | 977 (vvw)  | 973 (vvs)                                                                                            | 980 (vww)  |                                                              |            | 975 (vs)                                            | 975 (mw)  | 975 (s)                                                               |  | C-C, C-F                                     |
| 1140 (vw)                                                                          |            |                                                                                                      | 1130 (vww) |                                                              |            | -                                                   | 1133 (mw) | -                                                                     |  | C-C, C-F                                     |
| 1162 (mw)                                                                          |            | 1185 (s)                                                                                             | 1180 (vww) |                                                              |            | 1176 (ms)                                           | 1173 (mw) | 1183 (m)                                                              |  | C-C, C-F                                     |
| 1210 (vvs)                                                                         |            | 1216 (vvs)                                                                                           |            |                                                              |            | 1223 (vs)                                           | -         | 1218 (s)                                                              |  | C-C, C-F                                     |
| 1239 (ms)                                                                          |            | 1248 (vvs)                                                                                           | 1244 (vww) |                                                              |            | 1236 (vs)                                           | 1237 (mw) | 1249 (s)                                                              |  | C-C, C-F                                     |
| 1251 (ms)                                                                          |            |                                                                                                      |            |                                                              |            | -                                                   | -         | -                                                                     |  | -                                            |
| 1273 (ms)                                                                          | 1275 (vww) | 1278 (m)                                                                                             | 1281 (vww) |                                                              |            | 1274 (s)                                            | 1276 (mw) | 1268 (m)                                                              |  | C-C, C-F                                     |
| 1299 (mw)                                                                          | 1304 (vww) | 1300 (mw)                                                                                            | 1305 (vww) |                                                              |            | 1299 (s)                                            | -         | 1301 (m)                                                              |  | C-C, C-F                                     |
| 1353 (vw)                                                                          |            | 1355 (vw)                                                                                            |            |                                                              |            | 1349 (ms)                                           | 1353 (w)  | 1355 (m)                                                              |  | C-C, C-F                                     |
| <del>1821 (vww)</del>                                                              |            | <del>1809 (vww)</del>                                                                                |            |                                                              |            |                                                     |           |                                                                       |  | -                                            |
| 1841 (mw)                                                                          | 1843 (vww) | 1839 (ms)                                                                                            | 1842 (vww) | 1899 (1052)                                                  | 1899 (39)  |                                                     |           |                                                                       |  | vN-O A <sub>1</sub>                          |
| 2074 (vww)                                                                         | 2076 (vww) | 2072 (vww)                                                                                           | 2074 (vww) | 2048                                                         | 2048       |                                                     |           |                                                                       |  | v <sup>13</sup> C-O E                        |
|                                                                                    |            | 2099 (m)                                                                                             |            |                                                              |            |                                                     |           |                                                                       |  | vC-O*                                        |
| 2108 (ms)                                                                          | 2112 (vw)  | 2107 (vs)                                                                                            | 2110 (vww) | 2085 (1055)                                                  | 2085 (5)   |                                                     |           |                                                                       |  | vC-O E                                       |
| 2127 (vww)                                                                         | 2127 (vvs) |                                                                                                      | 2125 (vvs) |                                                              | 2097 (340) |                                                     |           |                                                                       |  | vC-O B <sub>2</sub>                          |
| 2164 (vww)                                                                         | 2164 (m)   | 2162 (vww)                                                                                           | 2163 (m)   | 2123 (230)                                                   | 2123 (217) |                                                     |           |                                                                       |  | vC-O A <sub>1</sub>                          |
|                                                                                    | 2175 (vw)  |                                                                                                      | 2173 (vw)  |                                                              |            |                                                     |           |                                                                       |  | vC-O A <sub>1</sub> of <b>1</b> and <b>2</b> |
| 2184 (vw)                                                                          | 2185 (m)   | 2183 (vw)                                                                                            | 2184 (m)   | 2161 (91)                                                    | 2161 (177) |                                                     |           |                                                                       |  | vC-O A <sub>1</sub>                          |

<sup>b)</sup> BP86-D3BJ/def2-TZVPP, C<sub>4v</sub> symmetry, no scale factor was applied. w: weak, m: medium, s: strong, v: very, sh: shoulder. The assignments of the respective anion bands and their intensities are based on [N(Bu)<sub>4</sub>][Al(OR<sup>F</sup>)<sub>4</sub>] (IR and Raman) in ref.<sup>47</sup> and [CBr<sub>3</sub>][F-{Al(OR<sup>F</sup>)<sub>3</sub>}<sub>2</sub>] (IR only) in ref.<sup>48</sup>. The characteristic IR bands that are suited best for differentiation between [Al(OR<sup>F</sup>)<sub>4</sub>]<sup>-</sup> and [F-{Al(OR<sup>F</sup>)<sub>3</sub>}<sub>2</sub>]<sup>-</sup> are given in italics; in Raman spectroscopy, the difference is subtler and shows best in the (roughly) 1:1 intensity of the bands at 747 and 798 cm<sup>-1</sup> ([Al(OR<sup>F</sup>)<sub>4</sub>]<sup>-</sup>) compared to a (roughly) 1:3 intensity for the bands at 753 and 818 cm<sup>-1</sup> ([F-{Al(OR<sup>F</sup>)<sub>3</sub>}<sub>2</sub>]<sup>-</sup>).

Bands of trace impurities are ~~crossed out~~: 2174/2173 cm<sup>-1</sup> belong to a small contamination with residual [Cr(CO)<sub>6</sub>]<sup>+</sup>, 1821/1809 cm<sup>-1</sup> might belong to the isotope-shifted A<sub>1</sub> vibration, since it appears also in the spectra of single crystals – however, since the shift is different for **3** and **4**, we stated it as an unknown impurity.

The additional bands in the carbonyl region is due to minor interactions with the counter ion (which distorts the ideal C<sub>4v</sub> structure). Note that here the Cr-N and Cr-C vibrations at 657 cm<sup>-1</sup> and 640 cm<sup>-1</sup> (<sup>8</sup>with overlapping Al-F-Al vibration of **4**) (IR) as well as 640 cm<sup>-1</sup> and 487 cm<sup>-1</sup> (Raman) can be assigned unambiguously (Supplementary Figure 33).<sup>\*</sup> Probably removal of the degeneracy of the E-mode in **4** (2107 cm<sup>-1</sup>).

The plots of the calculated IR and Raman spectra for [Cr(CO)<sub>5</sub>(NO)]<sup>+</sup> are shown in Supplementary Figure 40 and Supplementary Figure 41.

## Assignable Cr–N vibrations

Unambiguously assignable Cr–N vibrations are shown in Supplementary Figure 33.

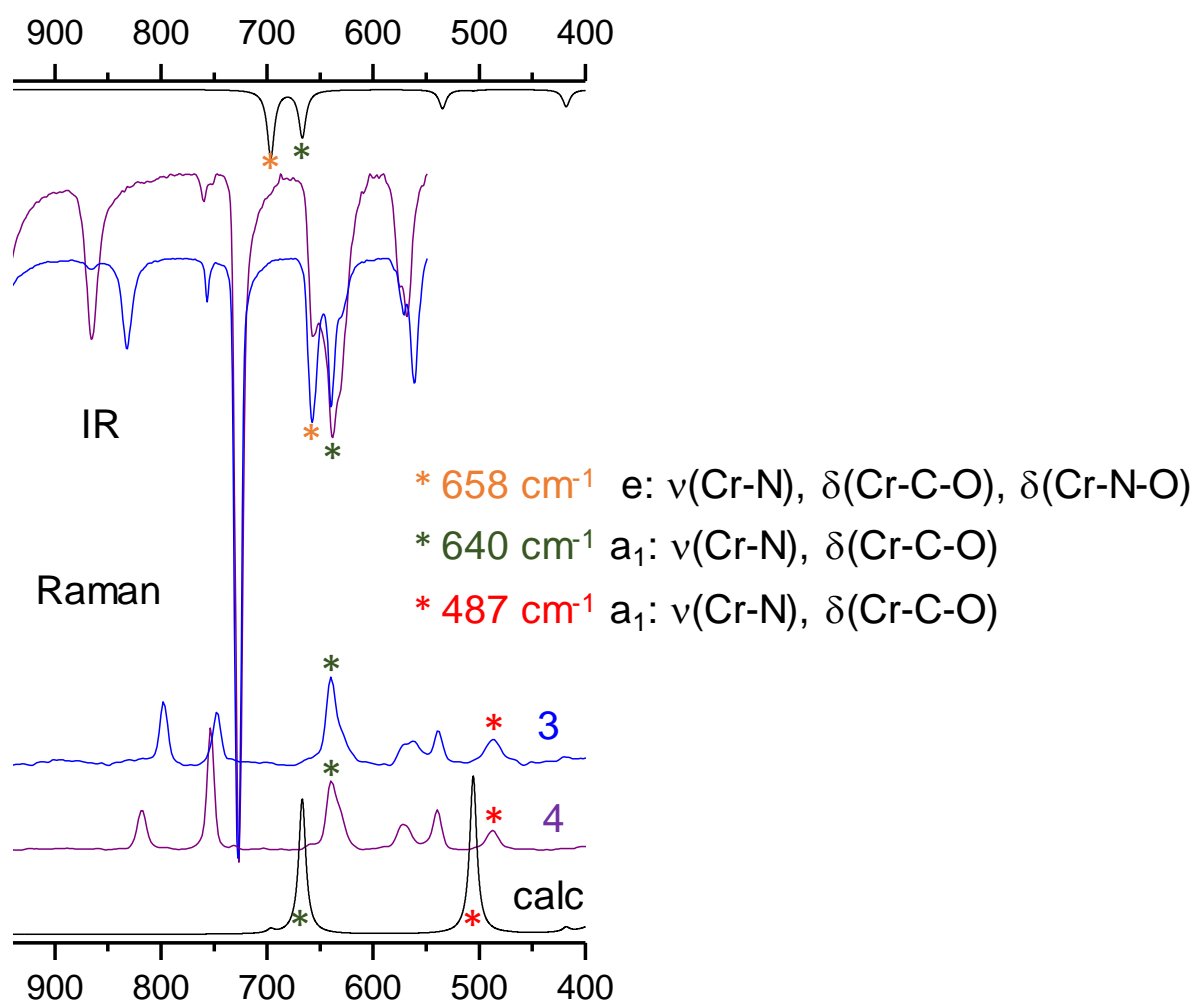

Supplementary Figure 33. Unambiguously assignable characteristic Cr–N and Cr–C vibrations of complexes 3 and 4.



## Comparison of $[\text{Cr}(\text{CO})_6]^{*+}$ and $\text{V}(\text{CO})_6$

Supplementary Figure 34 shows the comparison of IR and Raman spectra of  $[\text{Cr}(\text{CO})_6]^{*+}$  (this work) and the published spectra by Willner *et al.*<sup>49</sup> for the isoelectronic  $\text{V}(\text{CO})_6$ . The extremely similar band pattern underlines the similarity between both isoelectronic species, both also showing the aforementioned fluctuonality of a  $D_{3d}$  symmetric ground state.

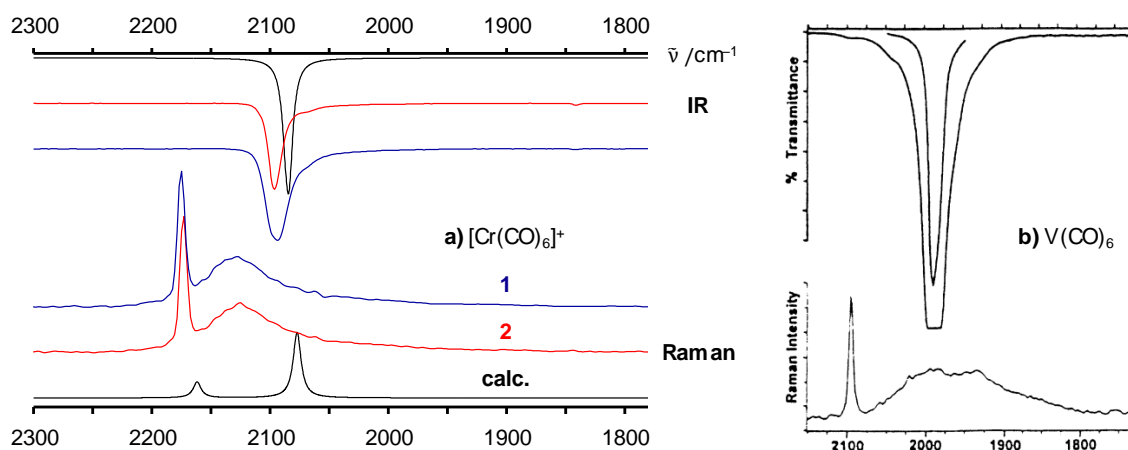

Supplementary Figure 34. Comparison between the vibrational spectra of  $[\text{Cr}(\text{CO})_6]^{*+}$  (this work, left) and the isoelectronic  $\text{V}(\text{CO})_6$  by Willner *et al.*<sup>49</sup> (IR gas-phase spectrum and Raman spectrum diluted in benzene at room temperature; right) supporting a fluctuating  $D_{3d}$  structure.

## 8. Gas Phase IR Spectra

Gas phase IR spectra (Supplementary Figure 35) were measured by two different methods to minimize undesired solvent bands of  $\text{CH}_2\text{Cl}_2$ . The IR gas cell is shown in Supplementary Figure 36.

- The reaction gas phase was expanded into an evacuated cooling trap at about  $-110\text{ }^\circ\text{C}$  (l.  $\text{N}_2$ /ethanol) to separate  $\text{CH}_2\text{Cl}_2$  vapours into another cooling trap at  $-196\text{ }^\circ\text{C}$  (l.  $\text{N}_2$ ) to trap the NO. Then the NO containing cooling trap was separated and allowed to warm up and expand into the evacuated IR gas cell.
- The reaction mixture after 14 d was cooled down to about  $-130\text{ }^\circ\text{C}$  (l.  $\text{N}_2/n$ -pentane) until the solvent was frozen solid. Then the gas phase of the reaction vessel was expanded into the evacuated IR cell.

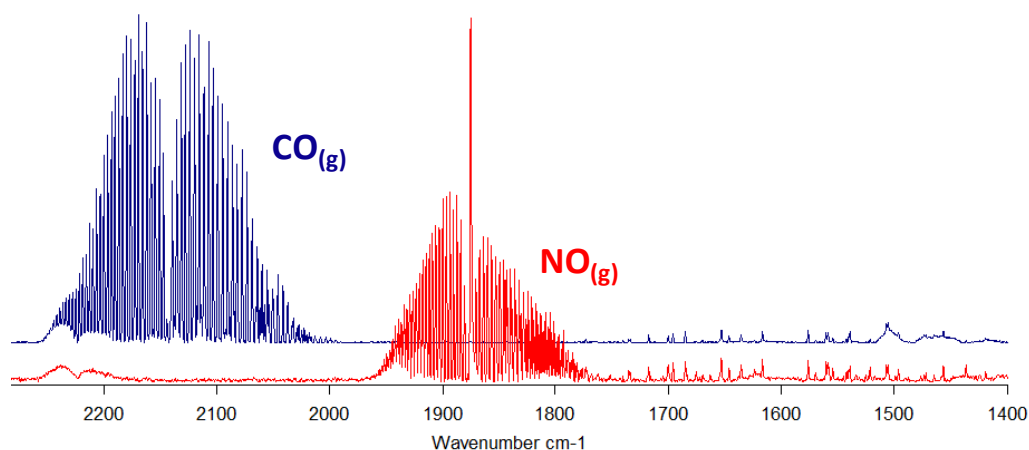

Supplementary Figure 35. Gas phase IR spectra of the reaction mixtures from the synthesis of  $[\text{Cr}(\text{CO})_6]^+[\text{Al}(\text{OR}^F)_4]^-$  after 20 min (bottom spectrum, red) and the synthesis of  $[\text{Cr}(\text{CO})_5(\text{NO})]^+[\text{Al}(\text{OR}^F)_4]^-$  after 14 d (top spectrum, blue).

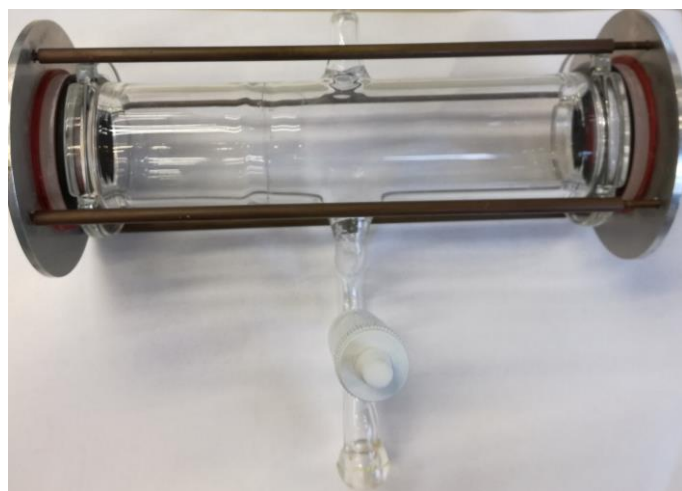

Supplementary Figure 36. IR gas cell.

## 9. EPR Spectroscopy

### Functional Evaluation

Before performing symmetry restricted structure optimizations of the  $[\text{Cr}(\text{CO})_6]^{*+}$  cation we evaluated the reasonability of different density functionals, namely M06-L<sup>50</sup>, TPSS<sup>34</sup>, TPSSh<sup>33</sup> and BP86<sup>51</sup>, the latter three extended by Grimme’s dispersion correction and Becke-Johnson Damping. The def2-TZVPP basis set was used throughout. These functionals were used for structure optimizations ( $C_1$  symmetry). We note, that for all investigated functionals the optimizations converged to a  $D_{3d}$  symmetric minimum structure. The so obtained structures served for DLPNO-CCSD(T) single-point energy calculations using the ORCA 4.0.1 program code without symmetry restrictions. It turned out, that structures obtained with the hybrid-meta-GGA functional TPSSh were lowest in energy on the DLPNO-CCSD(T) level of theory (Supplementary Table 4).

*Supplementary Table 4.* Single-point energies (DLPNO-CCSD(T)/def2-TZVPP) of  $D_{3d}$  symmetric structures of the  $[\text{Cr}(\text{CO})_6]^{*+}$  cation optimized by different density functionals. The energies  $\Delta E$  are given relative to the lowest energy of the TPSSh structure.

|                                   | M06-L | TPSS (D3BJ) | BP86 (D3BJ) | TPSSh (D3BJ) |
|-----------------------------------|-------|-------------|-------------|--------------|
| $\Delta E / (\text{kJ mol}^{-1})$ | 0.52  | 1.16        | 3.41        | 0.00         |

### Group Theory

In order to understand the obtained EPR-spectra and the underlying dynamic of the  $[\text{CrCO}_6]^{*+}$  cation we optimized its structure applying different point groups. Removal of one electron from the neutral  $\text{Cr}(\text{CO})_6$   $d^6$  complex breaks down its wave function symmetry resulting in an electronic  $B_{1g}$  state and making an  $O_h$  symmetric structure impossible. Following the normal vibrational modes of the  $O_h$  structure leads to the point groups the cationic  $d^5$  species may take. The  $E_g$  symmetric vibrations according to an axial compression along the z-axis and stretching along the x- and y-axis (and vice versa) lead to  $D_{4h}$  symmetric structures. We found (TPSSh-D3BJ/def2-TZVPP) a  $D_{4h}$  symmetric structure,  $B_{1g}$  electronic ground state, with compressed z-axis to be a local minimum whose electronic energy is  $+1.63 \text{ kJ mol}^{-1}$  (DLPNO-CCSD(T)/def2-TZVPP) above the global minimum.

Following the  $T_{2g}$  bending modes leads to a  $D_{2h}$  symmetric distortion. However, this  $D_{2h}^*$  structure  $2.04 \text{ kJ mol}^{-1}$  above the global minimum is not a stationary point (*cf.* asterisk) and shows a gradient linked to stretchings along the principal axes, i.e. an admixture with the  $E_g$

symmetric stretching modes. The relaxed stationary  $D_{2h}$  structure with  $B_{1g}$  electronic ground state shows one imaginary frequency exposing it to be a transition state at  $+0.85 \text{ kJ mol}^{-1}$  connecting two equivalent  $D_{3d}$  symmetric structures with an  $A_{1g}$  electronic ground state. The  $D_{3d}$  structure arises from a linear combination of all three  $T_{2g}$  bending modes of the parent  $O_h$  structure and was identified to be the global minimum structure.

We note, that the  $A_g$  electronic state of  $D_{2h}$  point group is identical with the above mentioned  $B_{1g}$  state in  $D_{4h}$ . Thus, probably the local  $D_{4h}$  minimum may be accessible via electronic transitions during distortions of the ground state  $D_{3d}$  structure via the  $D_{2h}$  symmetric transition state.

In addition, we identified a  $C_{2h}$  ( $A_g$ ) symmetric local minimum (not depicted in Supplementary Figure 37) corresponding to a combination of all  $T_{2g}$  and  $E_g$  vibrational modes. It deviates only marginally from the  $D_{3d}$  structure and thus is only  $+0.31 \text{ kJ mol}^{-1}$  in electronic energy above the global minimum.

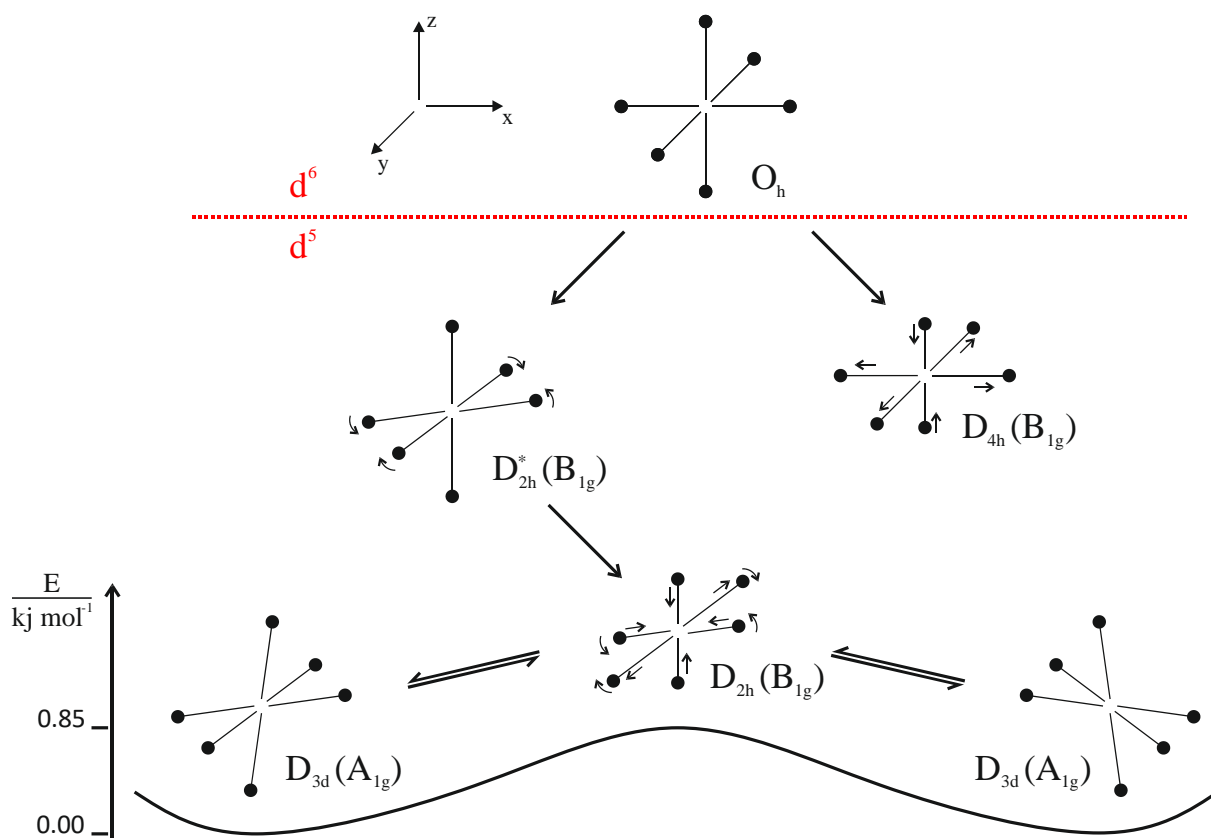

Supplementary Figure 37. Schematic representation of point groups the  $[\text{Cr}(\text{CO})_6]^+$  cation may take and their relation to the parent  $O_h$  symmetric  $\text{Cr}(\text{CO})_6$ . The interconversion of equivalent  $D_{3d}$  symmetric structures via the  $D_{2h}$  transition state at higher temperatures leads to an exchange of the molecular principal axis, i.e. the  $g$  anisotropy is averaged on the EPR time scale.

The thermal fluctuation between equivalent  $D_{3d}$  structures *via* the  $D_{2h}$  transition state is accompanied with an exchange of the principal axes of the  $[\text{Cr}(\text{CO})_6]^{++}$  cation. Hence, fast fluctuation prevents detection of the g-tensor anisotropy on the EPR time scale ( $g_{\perp} = 2.185$ ,  $g_{\parallel} = 1.947$ ,  $g_{\text{iso}} = 2.106$ ). This results in the coalescent EPR spectrum, i.e. averaged over all three spatial axes, we obtained at 100 K in contrast to the 4 K measurement showing only the signatures of the  $D_{3d}$  ground state.

## Hyperfine Coupling

The calculated hyperfine coupling constants of  $^{53}\text{Cr}$  in  $[\text{Cr}(\text{CO})_6]^{++}$  are shown in Supplementary Table 5.

*Supplementary Table 5.* Hyperfine Coupling constants in MHz (mT) of  $^{53}\text{Cr}$  in  $[\text{Cr}(\text{CO})_6]^{++}$  calculated at the TPSSh/ZORA-def2-TZVPP level of theory (for scalar relativistic ZORA calculations the def2-TZVPP basis set recontracted by D. A. Pantazis was used) including isotropic, dipolar and 2<sup>nd</sup> order contributions from spin orbit coupling. We made use of the Zero Order Regular Approximation (ZORA)<sup>52</sup> and applied a Gaussian finite nucleus model<sup>53</sup>; *iso* = *isotropic*.

|          | x             | y            | z             | iso          |
|----------|---------------|--------------|---------------|--------------|
| $D_{3d}$ | -4.31 (-0.16) | 39.53 (1.30) | 39.54 (1.30)  | 24.92 (0.85) |
| $D_{4h}$ | 10.96 (0.32)  | 10.96 (0.32) | 62.11 (2.52)) | 29.77 (0.96) |

## XYZ-Coordinates of Optimized Structures

All coordinates (Supplementary Data 1) are given in Ångström. A given point group indicates symmetry restrictions made for the structure optimization.

*Supplementary Data 1.* Information on the atomic coordinates  $[\text{Cr}(\text{CO})_6]^+$ .

### $[\text{Cr}(\text{CO})_6]^{++}$ M06-L

|    |                   |                   |                   |
|----|-------------------|-------------------|-------------------|
| Cr | -0.00172881229403 | -0.00000077435582 | -0.00000059255038 |
| C  | 1.45791443823981  | 0.84451732385296  | -1.05398409546532 |
| O  | 2.29056405816007  | 1.33232564049600  | -1.64060048426715 |
| C  | 1.45791455196409  | -0.84451765882305 | 1.05398432232663  |
| O  | 2.29056403565950  | -1.33232403210469 | 1.64060245246521  |
| C  | -1.46209777554421 | -0.84488433912572 | 1.05338247919505  |
| O  | -2.29491191975216 | -1.33281006106499 | 1.63962464693159  |
| C  | -1.46209814104130 | 0.84488431653632  | -1.05338238385179 |
| O  | -2.29491223297483 | 1.33281241651990  | -1.63962275123244 |
| C  | 0.00140286706382  | 1.68803696294950  | 1.05008027361462  |
| O  | 0.00799274317260  | 2.65375856122732  | 1.63556121936135  |
| C  | 0.00140302010543  | -1.68803831543978 | -1.05008217907317 |
| O  | 0.00799316724123  | -2.65376004066797 | -1.63556290745419 |

**[Cr(CO)<sub>6</sub>]<sup>+</sup> TPSS (D3BJ)**

|    |                   |                   |                   |
|----|-------------------|-------------------|-------------------|
| Cr | -0.00176354403789 | -0.00000029237989 | -0.00000050334991 |
| C  | 1.43997387696736  | 0.83508298776808  | -1.05879420594979 |
| O  | 2.27268260531531  | 1.32299290787730  | -1.65895003764923 |
| C  | 1.43997361666532  | -0.83508292133695 | 1.05879403408460  |
| O  | 2.27268222566009  | -1.32299213083920 | 1.65895059967334  |
| C  | -1.44430209108314 | -0.83536860384086 | 1.05805395824889  |
| O  | -2.27728282342698 | -1.32339176997282 | 1.65770412698598  |
| C  | -1.44430229719773 | 0.83536879245988  | -1.05805398677128 |
| O  | -2.27728309349410 | 1.32339300581885  | -1.65770321325069 |
| C  | 0.00156170976816  | 1.66809536738832  | 1.05545797114075  |
| O  | 0.00824874638401  | 2.63478221947750  | 1.65309074533049  |
| C  | 0.00156191812613  | -1.66809623484740 | -1.05545856684236 |
| O  | 0.00824915035347  | -2.63478332757280 | -1.65309092165079 |

**[Cr(CO)<sub>6</sub>]<sup>+</sup> BP86 (D3BJ)**

|    |                   |                   |                   |
|----|-------------------|-------------------|-------------------|
| Cr | -0.00108193827643 | -0.00000003774586 | -0.00000001680537 |
| C  | 1.42878876782816  | 0.82665176985051  | -1.05259641450257 |
| O  | 2.26429955319072  | 1.31395264871178  | -1.65393752786568 |
| C  | 1.42878875997201  | -0.82665184513319 | 1.05259639817745  |
| O  | 2.26429954280894  | -1.31395271330183 | 1.65393753581533  |
| C  | -1.43133916440627 | -0.82694343705710 | 1.05210693272432  |
| O  | -2.26699650052138 | -1.31448276196102 | 1.65303032661481  |
| C  | -1.43133914132449 | 0.82694345256530  | -1.05210686683029 |
| O  | -2.26699645210755 | 1.31448298060838  | -1.65303013044643 |
| C  | 0.00064969158924  | 1.65262853966747  | 1.05068881877259  |
| O  | 0.00513840903592  | 2.62081678038757  | 1.65050781022921  |
| C  | 0.00064980201034  | -1.65262857962956 | -1.05068891907656 |
| O  | 0.00513867020077  | -2.62081679696247 | -1.65050794680681 |

**[Cr(CO)<sub>6</sub>]<sup>+</sup> TPSSh (D3BJ)**

|    |                   |                   |                   |
|----|-------------------|-------------------|-------------------|
| Cr | -0.00198775920301 | -0.00000009930945 | -0.00000008659186 |
| C  | 1.44282157372714  | 0.83711956793837  | -1.06101148297952 |
| O  | 2.27057831681706  | 1.32277509570077  | -1.65748663600178 |
| C  | 1.44282143834167  | -0.83711968852719 | 1.06101133483033  |
| O  | 2.27057817757719  | -1.32277519665700 | 1.65748652016147  |
| C  | -1.44757901843402 | -0.83736786873882 | 1.06039021993630  |
| O  | -2.27557934439513 | -1.32305362786048 | 1.65646645952626  |
| C  | -1.44757897924176 | 0.83736794311149  | -1.06039007017544 |
| O  | -2.27557926569748 | 1.32305411469813  | -1.65646601378394 |
| C  | 0.00180708088515  | 1.67195782004294  | 1.05733338944803  |
| O  | 0.00894490335087  | 2.63322992065444  | 1.65128955473324  |
| C  | 0.00180739298113  | -1.67195794050553 | -1.05733351299141 |
| O  | 0.00894548329119  | -2.63323004054768 | -1.65128967611168 |

**[Cr(CO)<sub>6</sub>]<sup>+</sup> D<sub>3d</sub> TPSSh (D3BJ)**

|    |            |            |            |
|----|------------|------------|------------|
| Cr | 0.0000000  | 0.0000000  | 0.0000000  |
| C  | 1.4445495  | 0.8340111  | -1.0579726 |
| O  | 2.2782278  | 1.3153354  | -1.6495390 |
| C  | 1.4445495  | -0.8340111 | 1.0579726  |
| O  | 2.2782278  | -1.3153354 | 1.6495390  |
| C  | -1.4445495 | -0.8340111 | 1.0579726  |
| O  | -2.2782278 | -1.3153354 | 1.6495390  |
| C  | -1.4445495 | 0.8340111  | -1.0579726 |
| O  | -2.2782278 | 1.3153354  | -1.6495390 |
| C  | 0.0000000  | 1.6680221  | 1.0579726  |

|   |            |            |            |
|---|------------|------------|------------|
| O | -0.0000000 | 2.6306708  | 1.6495390  |
| C | 0.0000000  | -1.6680221 | -1.0579726 |
| O | -0.0000000 | -2.6306708 | -1.6495390 |

**[Cr(CO)<sub>6</sub>]<sup>+</sup> C<sub>2h</sub> TPSSh (D3BJ)**

|    |            |            |            |
|----|------------|------------|------------|
| Cr | 0.0000000  | 0.0000000  | 0.0000000  |
| C  | 1.9727849  | -0.0977432 | 0.0000000  |
| O  | 3.1003742  | -0.1697695 | 0.0000000  |
| C  | 0.0712709  | -1.3452785 | -1.4445565 |
| O  | 0.1233153  | -2.1061052 | -2.2782681 |
| C  | -1.9727849 | 0.0977432  | 0.0000000  |
| O  | -3.1003742 | 0.1697695  | 0.0000000  |
| C  | -0.0712709 | 1.3452785  | 1.4445565  |
| O  | -0.1233153 | 2.1061052  | 2.2782681  |
| C  | 0.0712709  | -1.3452785 | 1.4445565  |
| O  | 0.1233153  | -2.1061052 | 2.2782681  |
| C  | -0.0712709 | 1.3452785  | -1.4445565 |
| O  | -0.1233153 | 2.1061052  | -2.2782681 |

**[Cr(CO)<sub>6</sub>]<sup>+</sup> D<sub>2h</sub> TPSSh (D3BJ)**

|    |            |            |            |
|----|------------|------------|------------|
| Cr | 0.0000000  | 0.0000000  | 0.0000000  |
| C  | 1.3278985  | 0.0000000  | 1.4486680  |
| C  | -1.3278985 | 0.0000000  | 1.4486680  |
| C  | -1.3278985 | 0.0000000  | -1.4486680 |
| C  | 0.0000000  | 1.9959683  | 0.0000000  |
| C  | 1.3278985  | 0.0000000  | -1.4486680 |
| C  | 0.0000000  | -1.9959683 | 0.0000000  |
| O  | 0.0000000  | 3.1237888  | 0.0000000  |
| O  | -2.0800590 | 0.0000000  | -2.2931913 |
| O  | -2.0800590 | 0.0000000  | 2.2931913  |
| O  | 0.0000000  | -3.1237888 | 0.0000000  |
| O  | 2.0800590  | 0.0000000  | 2.2931913  |
| O  | 2.0800590  | 0.0000000  | -2.2931913 |

**[Cr(CO)<sub>6</sub>]<sup>+</sup> D<sub>2h</sub>\* TPSSh (D3BJ)**

|    |            |            |            |
|----|------------|------------|------------|
| Cr | 0.0000000  | 0.0000000  | 0.0000000  |
| C  | -1.3323658 | 0.0000000  | 1.4521414  |
| C  | 1.3323658  | 0.0000000  | -1.4521414 |
| C  | 1.3323658  | 0.0000000  | 1.4521414  |
| C  | 0.0000000  | -1.9707600 | 0.0000000  |
| C  | -1.3323658 | 0.0000000  | -1.4521414 |
| C  | 0.0000000  | 1.9707600  | 0.0000000  |
| O  | 0.0000000  | 3.1011400  | 0.0000000  |
| O  | 2.0847636  | 0.0000000  | 2.2957135  |
| O  | -2.0847636 | 0.0000000  | 2.2957135  |
| O  | 0.0000000  | -3.1011400 | 0.0000000  |
| O  | 2.0847636  | 0.0000000  | -2.2957135 |
| O  | -2.0847636 | 0.0000000  | -2.2957135 |

**[Cr(CO)<sub>6</sub>]<sup>+</sup> D<sub>4h</sub> TPSSh (D3BJ)**

|    |           |           |           |
|----|-----------|-----------|-----------|
| Cr | 0.0000000 | 0.0000000 | 0.0000000 |
|----|-----------|-----------|-----------|

|   |            |            |            |
|---|------------|------------|------------|
| C | 0.0000000  | 0.0000000  | -1.9406398 |
| O | 0.0000000  | 0.0000000  | -3.0740837 |
| C | -1.4093344 | 1.4093344  | 0.0000000  |
| O | -2.2070384 | 2.2070384  | 0.0000000  |
| C | 0.0000000  | 0.0000000  | 1.9406398  |
| O | 0.0000000  | 0.0000000  | 3.0740837  |
| C | 1.4093344  | -1.4093344 | 0.0000000  |
| O | 2.2070384  | -2.2070384 | 0.0000000  |
| C | -1.4093344 | -1.4093344 | 0.0000000  |
| O | -2.2070384 | -2.2070384 | 0.0000000  |
| C | 1.4093344  | 1.4093344  | 0.0000000  |
| O | 2.2070384  | 2.2070384  | 0.0000000  |

**[Cr(CO)<sub>6</sub>]<sup>+</sup> O<sub>h</sub> TPSSh (D3BJ)**

|    |            |            |            |
|----|------------|------------|------------|
| Cr | -0.0000000 | -0.0000000 | -0.0000000 |
| C  | -0.0000000 | 1.9707625  | -0.0000000 |
| C  | 0.0000000  | -1.9707625 | 0.0000000  |
| C  | 0.0000000  | -0.0000000 | 1.9707625  |
| C  | -1.9707625 | -0.0000000 | -0.0000000 |
| C  | -0.0000000 | -0.0000000 | -1.9707625 |
| C  | 1.9707625  | 0.0000000  | 0.0000000  |
| O  | 3.1011426  | 0.0000000  | -0.0000000 |
| O  | -0.0000000 | 0.0000000  | 3.1011426  |
| O  | -0.0000000 | 3.1011426  | 0.0000000  |
| O  | -3.1011426 | -0.0000000 | 0.0000000  |
| O  | 0.0000000  | -3.1011426 | 0.0000000  |
| O  | 0.0000000  | -0.0000000 | -3.101142  |



## 10. IR and Raman Spectra

### Calculated $[\text{Cr}(\text{CO})_6]^+$ (Turbomole)

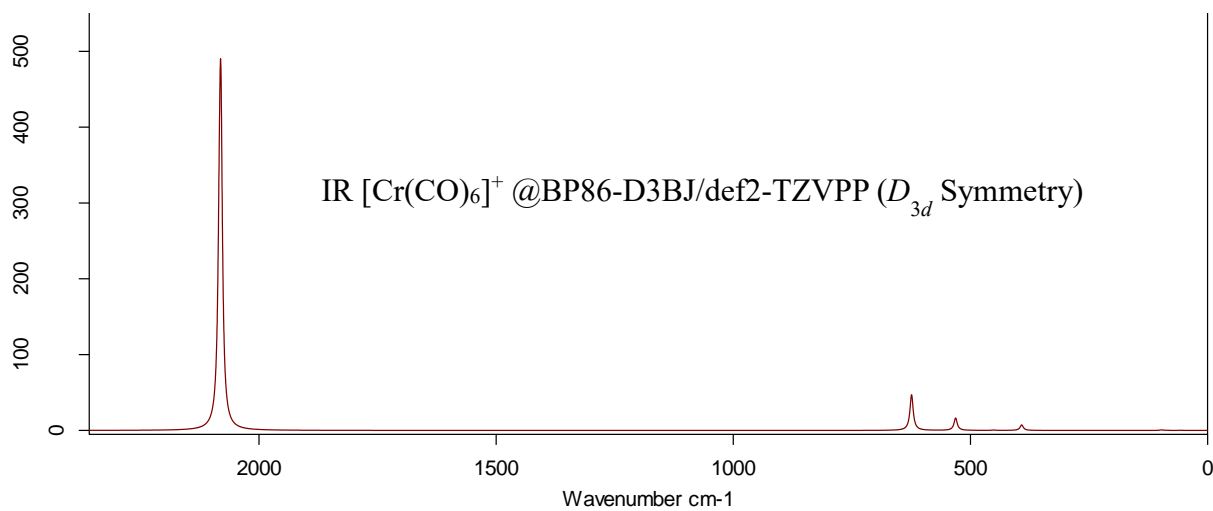

Supplementary Figure 38. Calculated IR spectrum of  $[\text{Cr}(\text{CO})_6]^+$ .

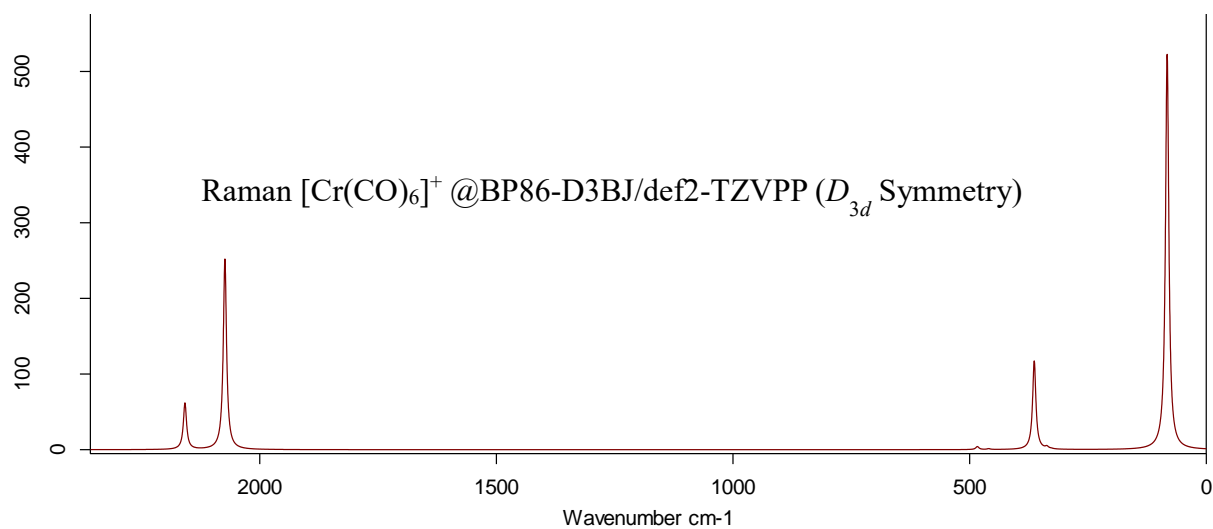

Supplementary Figure 39. Calculated Raman spectrum of  $[\text{Cr}(\text{CO})_6]^+$ .

### Calculated $[\text{Cr}(\text{CO})_5(\text{NO})]^+$ (Turbomole)

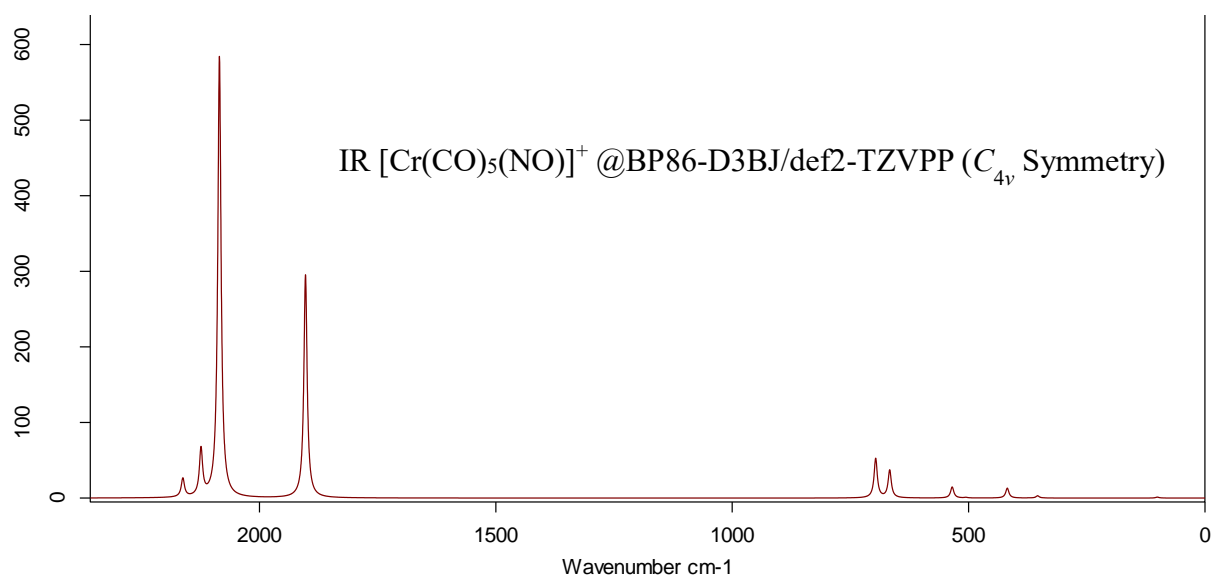

Supplementary Figure 40. Calculated IR spectrum of  $[\text{Cr}(\text{CO})_5(\text{NO})]^+$ .

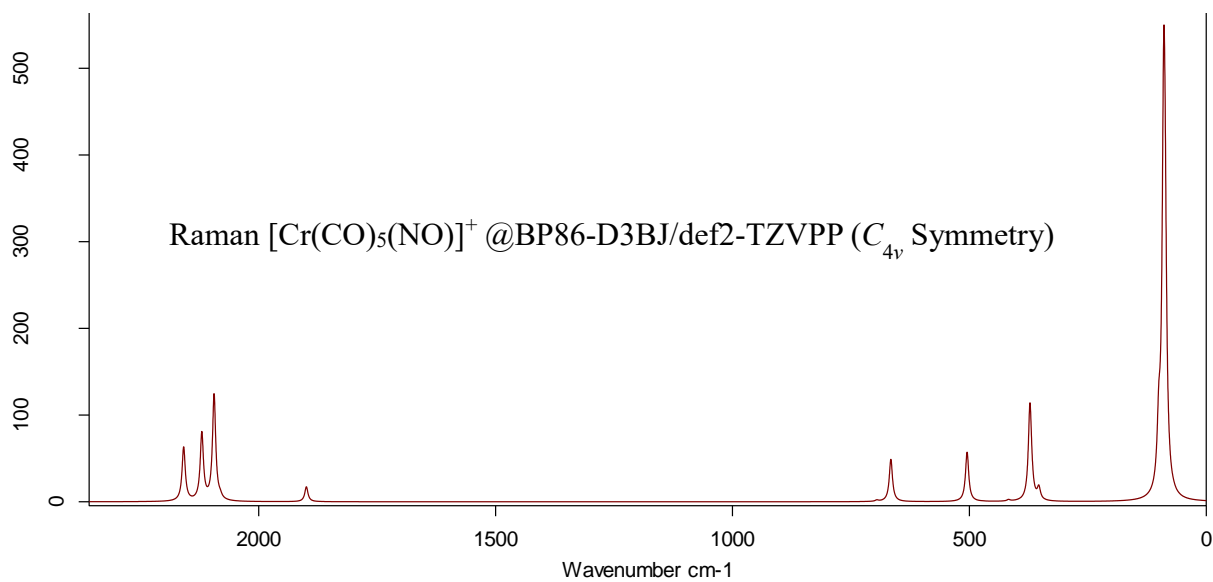

Supplementary Figure 41. Calculated Raman spectrum of  $[\text{Cr}(\text{CO})_5(\text{NO})]^+$ .

**[Cr(CO)<sub>6</sub>][Al(OR<sup>F</sup>)<sub>4</sub>] (1)**

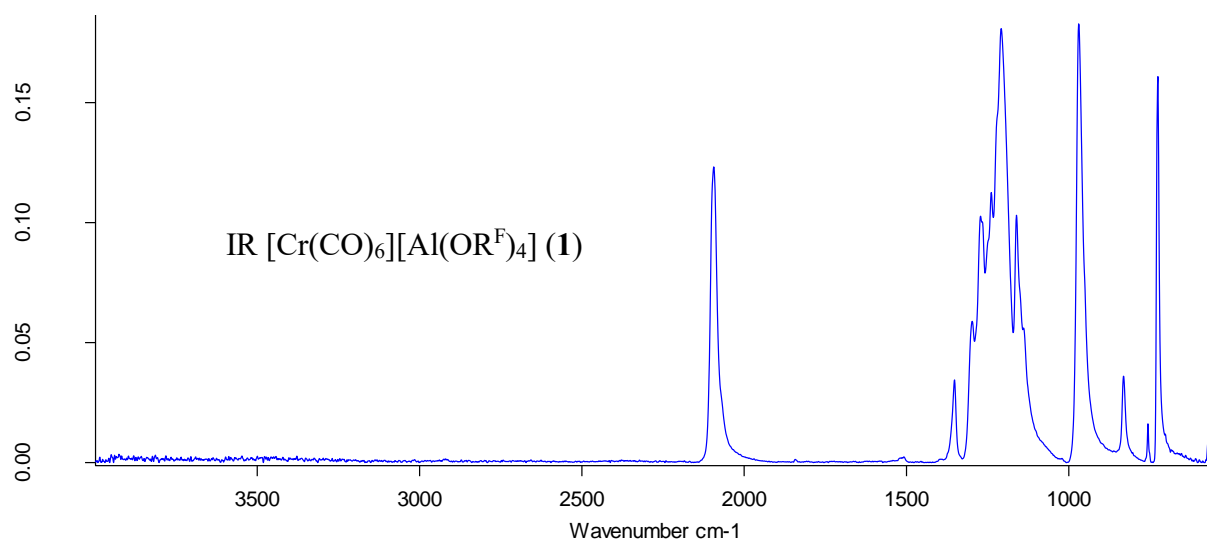

Supplementary Figure 42. IR spectrum of **1**.

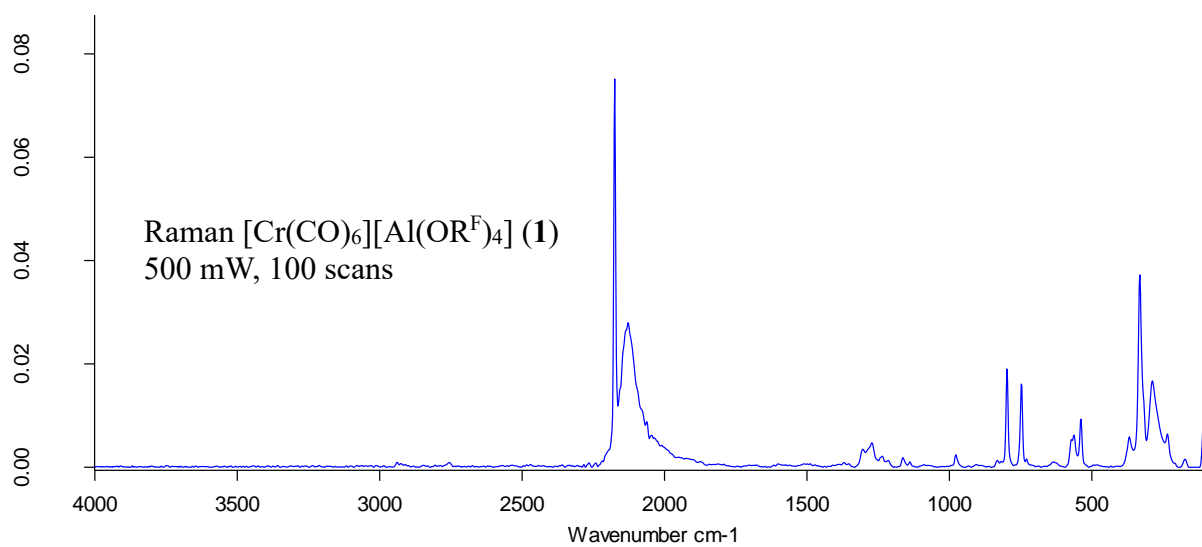

Supplementary Figure 43. Raman spectrum of **1**.

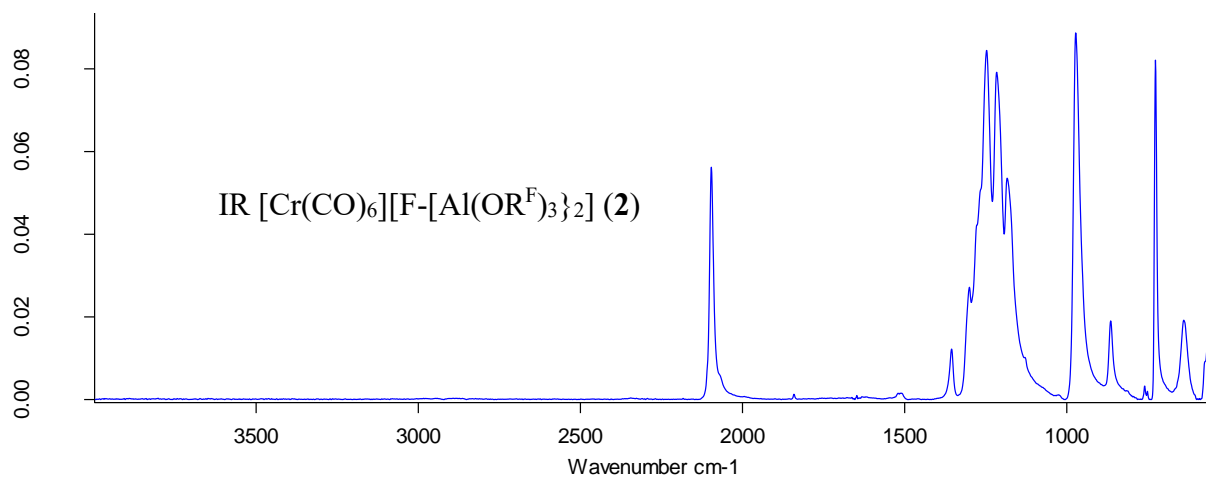

Supplementary Figure 44. IR spectrum of 2.

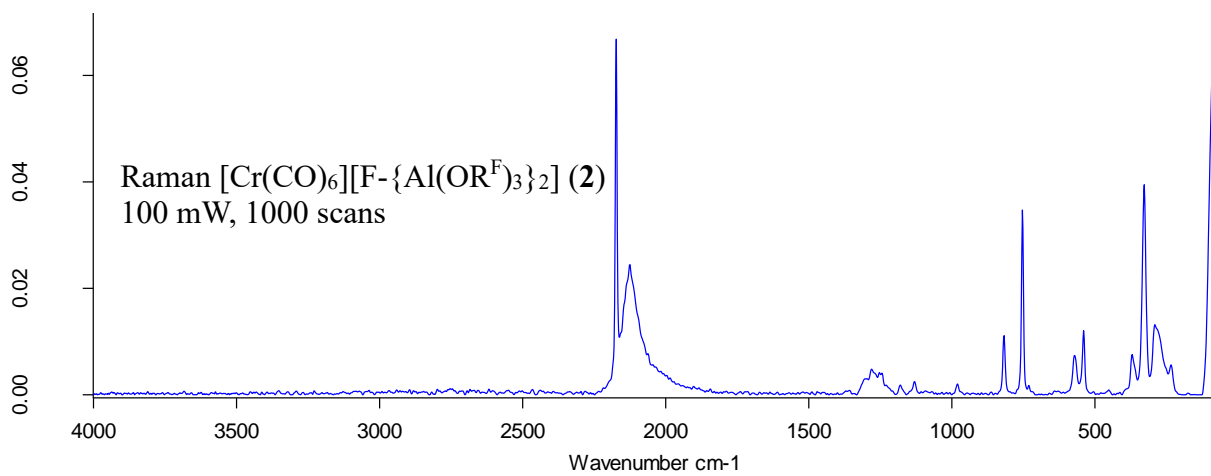

Supplementary Figure 45. Raman spectrum of 2.

**[Cr(CO)<sub>5</sub>(NO)][Al(OR<sup>F</sup>)<sub>4</sub>] (3)**

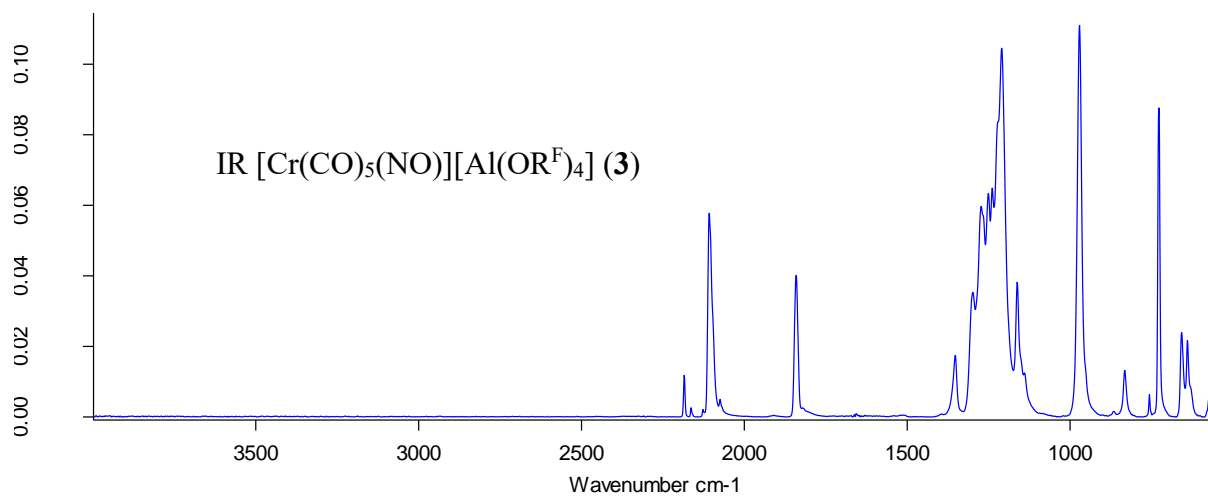

Supplementary Figure 46. IR spectrum of 3.

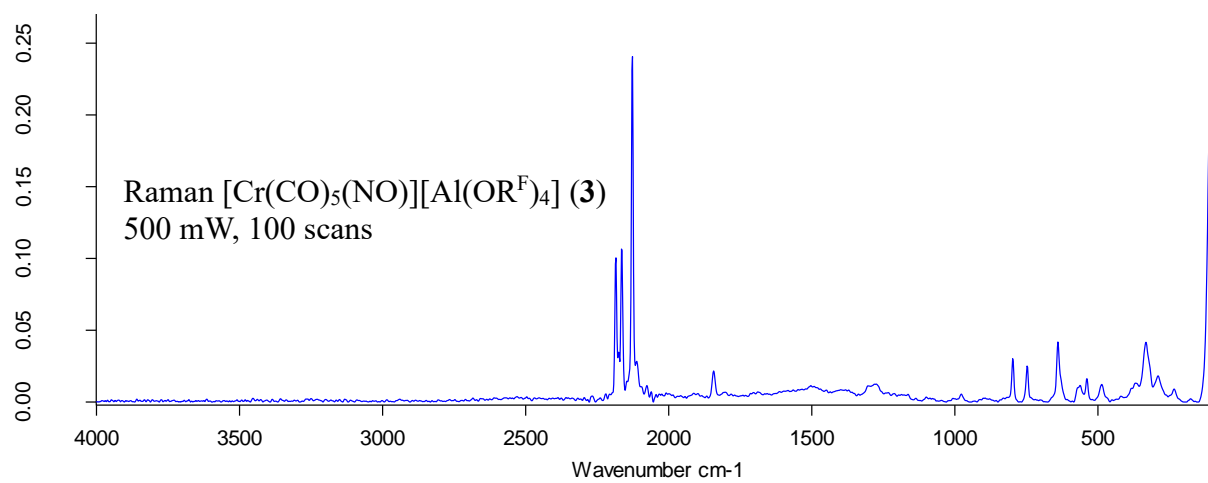

Supplementary Figure 47. Raman spectrum of 3.

**[Cr(CO)<sub>5</sub>(NO)][F-{Al(OR<sup>F</sup>)<sub>3</sub>}<sub>2</sub>] (4)**

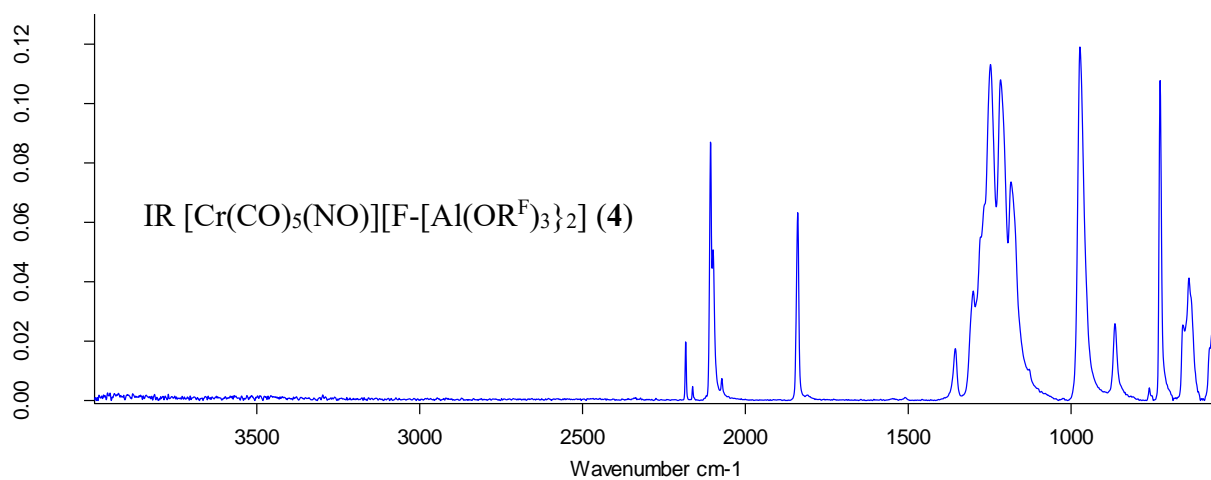

*Supplementary Figure 48.* IR spectrum of **4**.

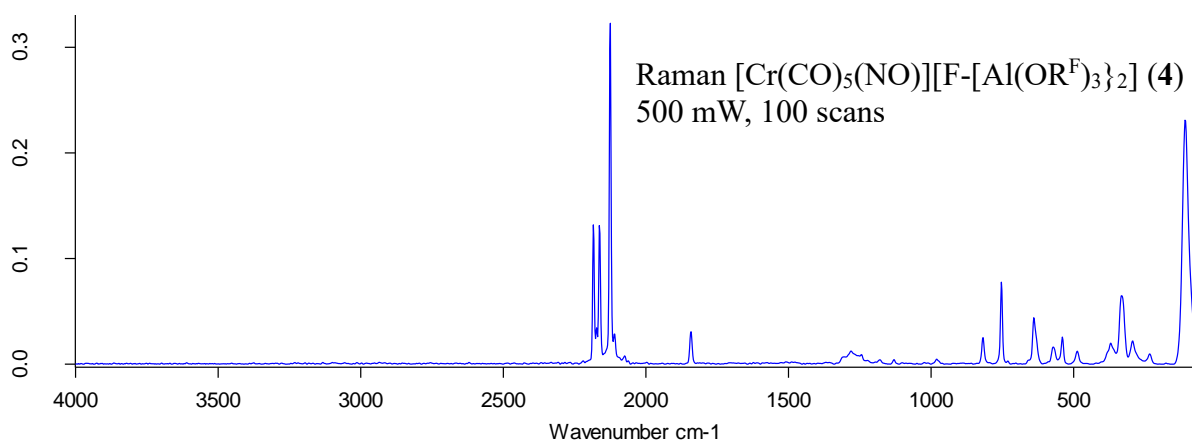

*Supplementary Figure 49.* Raman spectrum of **4**.

## 11. UV/Vis Spectra

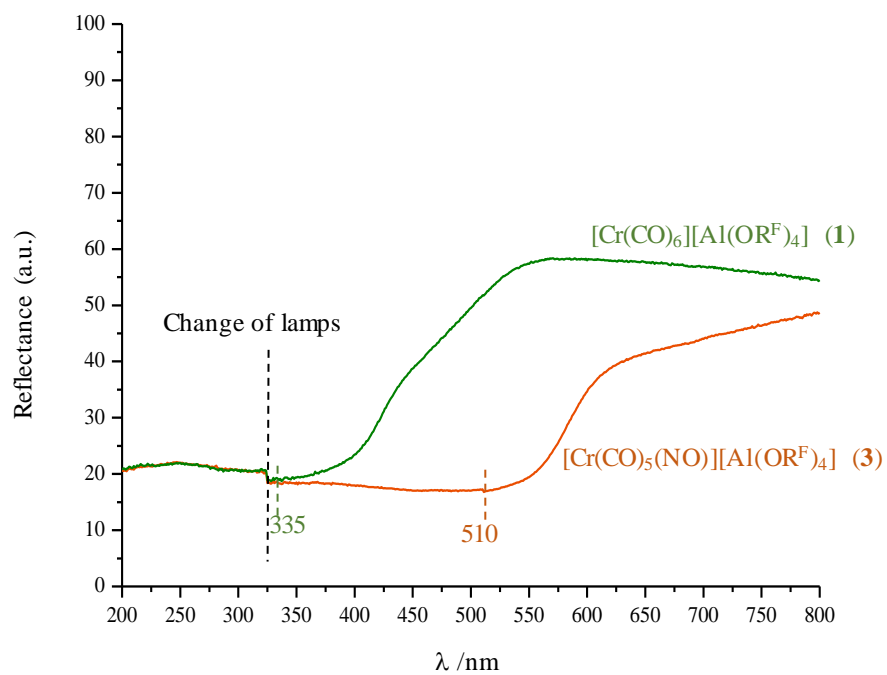

Supplementary Figure 50. Diffuse reflectance spectra of complexes **1** (green line) and **3** (orange line) and their maximum absorption at 335 nm and 510 nm respectively. The dashed line at 325 nm indicates the change of lamps of the spectrometer.

## 12. Elemental Analyses

Due to the high fluorine content (about 57% and 61%), reliable elemental analyses are problematic<sup>54,55</sup> (see for example: Marcó, A.; Compañó, R.; Rubio, R.; Casals, I. *Microchim. Acta* **2003**, *142*, 13–19 or the *Organometallics* editorial *Organometallics* **2016**, *35* (19), 3255–3256) and we refrained from using them in the first place.

In addition, we have done quite a few tests with our materials and using the equipment available to us in the chemistry department in Freiburg. Unfortunately, also with the new set up that was acquired only 3 years ago and supposedly able to treat CF<sub>3</sub> groups, the test elemental analyses of electrochemically and spectroscopically extremely pure air- and water-stable [NBu<sub>4</sub>][Al(OR<sup>F</sup>)<sub>4</sub>] gave combustion analysis values that were off by erratically 2-3 % for samples from the same batch. However, the facility at KIT Karlsruhe was able to deal with compounds with high fluorine contents. Exemplarily, we tested a sample of [Cr(CO)<sub>6</sub>][Al(OR<sup>F</sup>)<sub>4</sub>] (calcd.: C 22.26; Al 2.27; Cr 4.38; F 57.61; O 13.48) there. The results are shown in the table below (Supplementary Table 6).

Supplementary Table 6. Elemental analysis of **1**.

| Sample                                                                            | N    | C     | H     | S     |
|-----------------------------------------------------------------------------------|------|-------|-------|-------|
| 1.178 mg                                                                          | 0.17 | 23.30 | 0.247 | 0.109 |
| 2.367 mg                                                                          | 0.08 | 22.71 | 0.130 | 0.049 |
| Avg.                                                                              | 0.13 | 23.00 | 0.189 | 0.079 |
| <b>Expected</b><br>[Cr(CO) <sub>6</sub> ](Al(OR <sup>F</sup> ) <sub>4</sub> )     | 0.00 | 22.26 | 0.000 | 0.000 |
| <b>Expected</b><br>[Cr(CO) <sub>5</sub> (NO)](Al(OR <sup>F</sup> ) <sub>4</sub> ) | 1.18 | 21.21 | 0.000 | 0.000 |

The discrepancy between theoretical and experimental carbon content is small enough to be acceptable for an inorganic organometallic compound like this and is considered publishable, especially with the reasons given above. However, elemental analyses does not answer the question of the purity of the bulk materials any better than the sum of vibrational and NMR spectroscopy as well as pXRD which we thoroughly deployed here. This is the reason, why we trust the combination of these methods more than a doubtful combustion analysis with large deviations and tolerance thereof.



### 13. Powder XRD Data and Rietveld Refinement

In order to evaluate the phase purity of the bulk materials **1–4**, powder XRD measurements were conducted at 100K. In the following section the experimental diffractogram and the from the single-crystal data calculated/simulated powder XRD are compared. They show perfect agreement of the reflexes and therefore the absence of crystalline impurities. Furthermore, an overlay of the background and non-background corrected diffractograms indicate the absence of large amounts of amorphous impurities (see Supplementary Figure 51 to Supplementary Figure 62 for all powder-XRD plots).

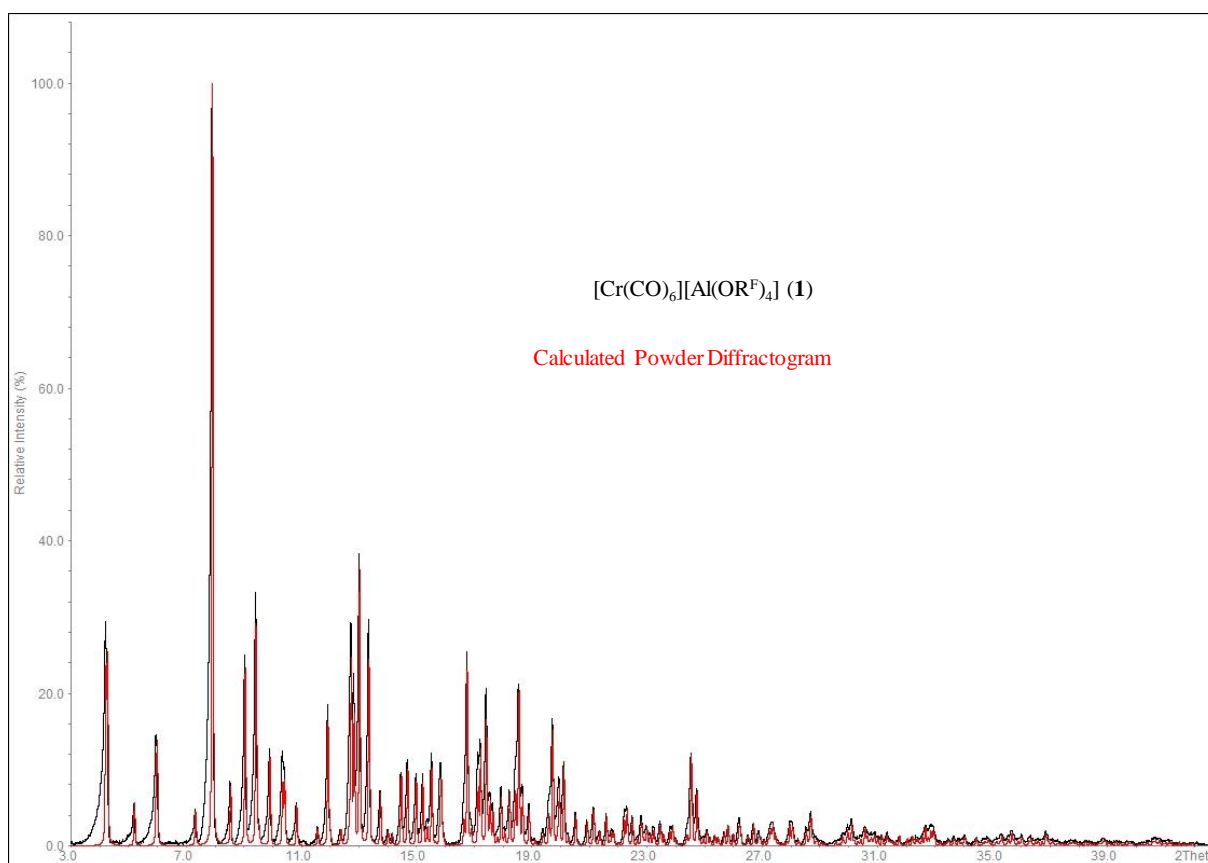

Supplementary Figure 51. Experimental (black) and calculated (red) powder diffractogram for **1**.

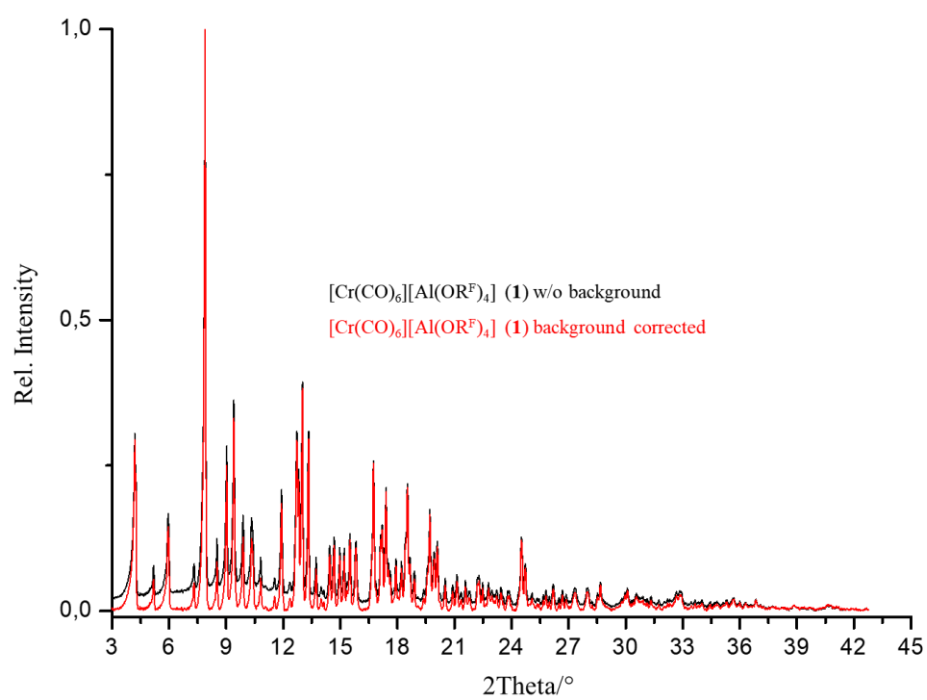

Supplementary Figure 52. Experimental powder diffractogram of **1** with (red) and without (black) background correction.

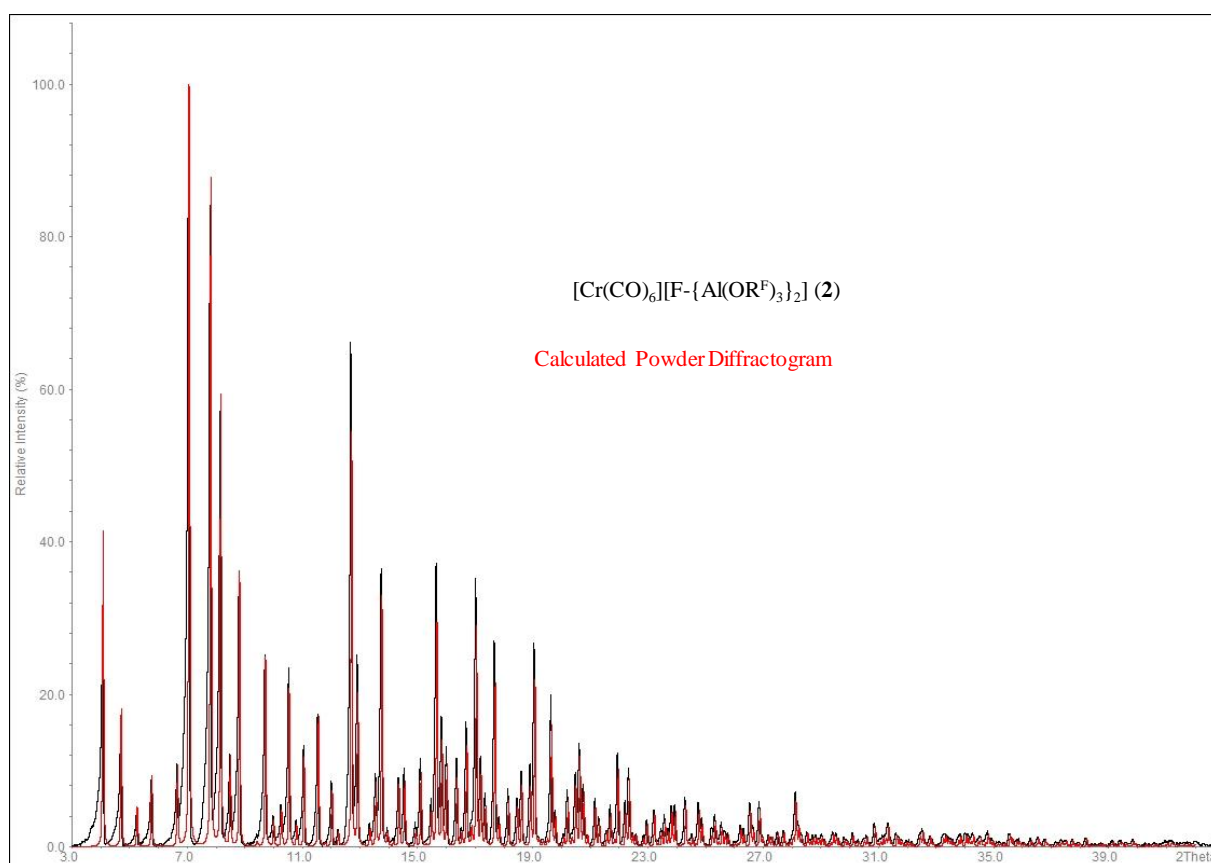

Supplementary Figure 53. Experimental (black) and calculated (red) powder diffractogram of **2**.

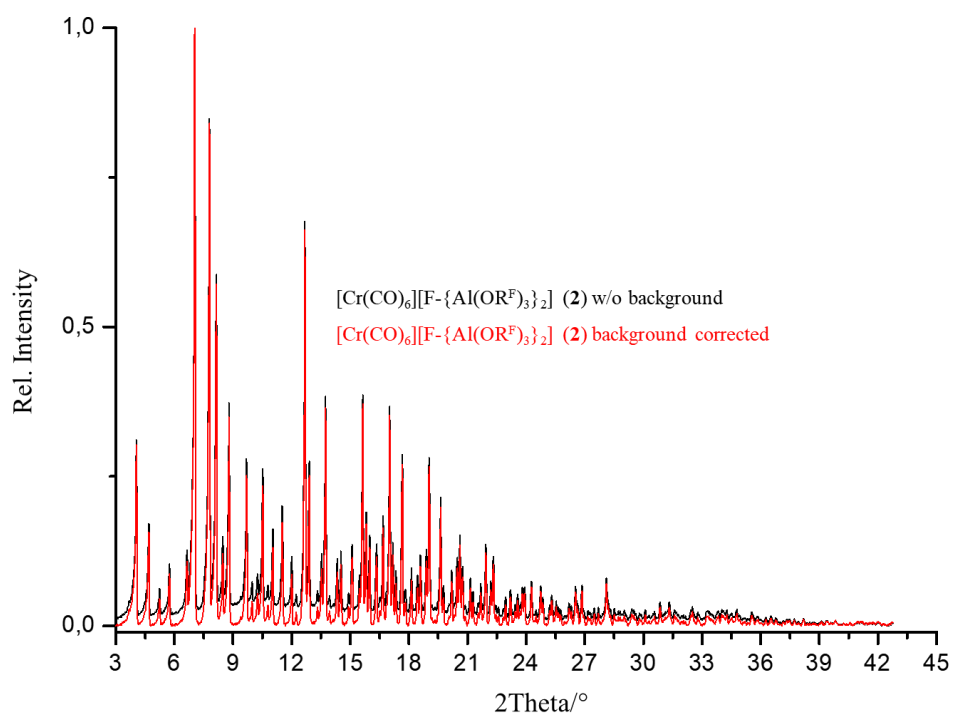

Supplementary Figure 54. Experimental powder diffractogram of **2** with (red) and without (black) background correction

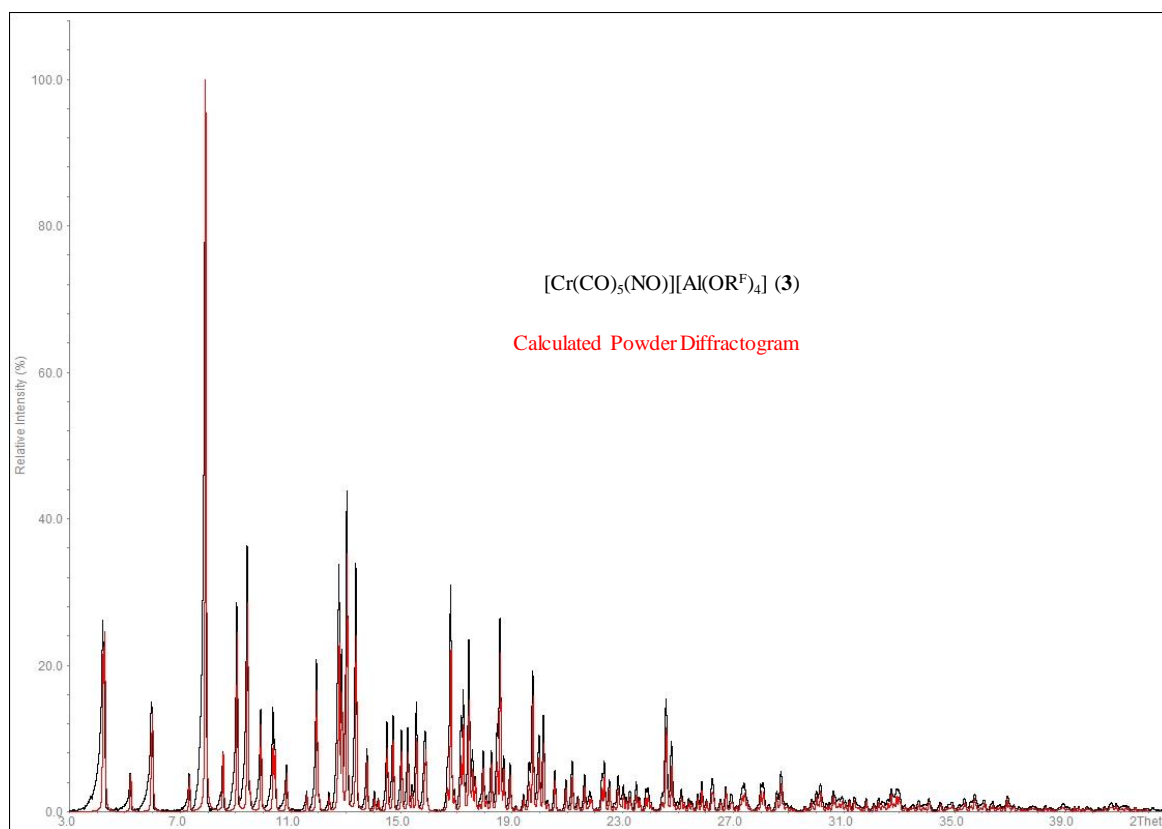

Supplementary Figure 55. Experimental (black) and calculated (red) powder diffractogram of 3.

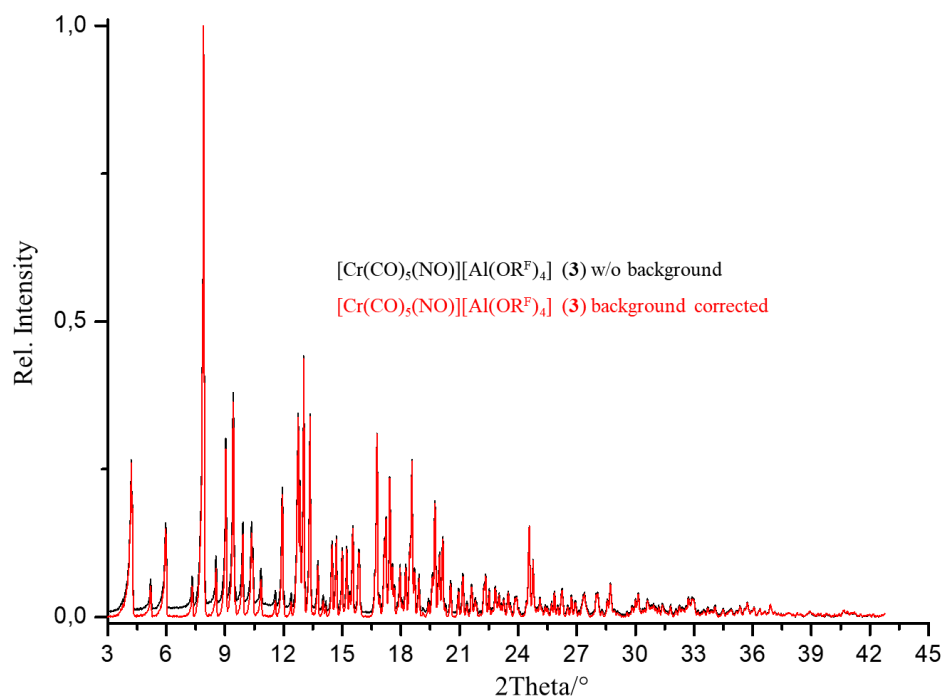

Supplementary Figure 56. Experimental powder diffractogram of 3 with (red) and without (black) background correction.

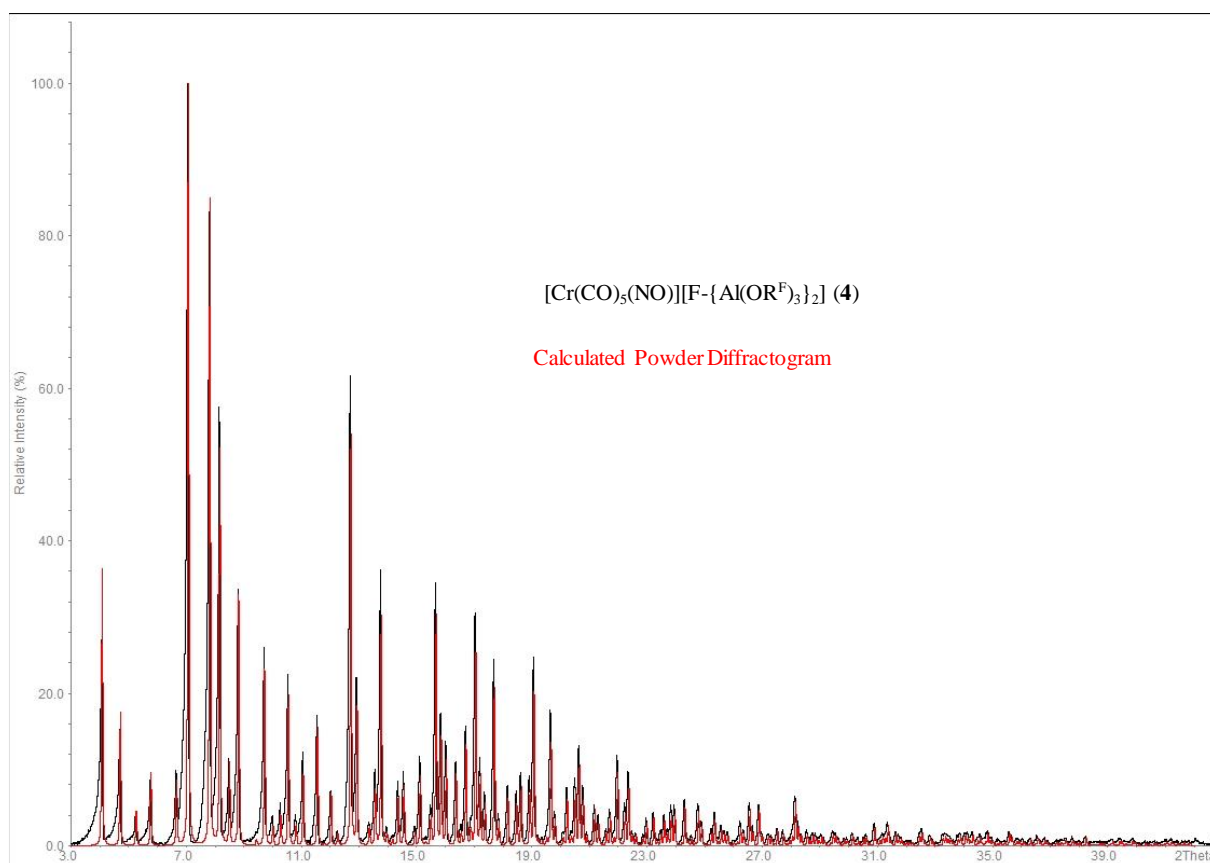

Supplementary Figure 57. Experimental (black) and calculated (red) powder diffractogram of **4**.

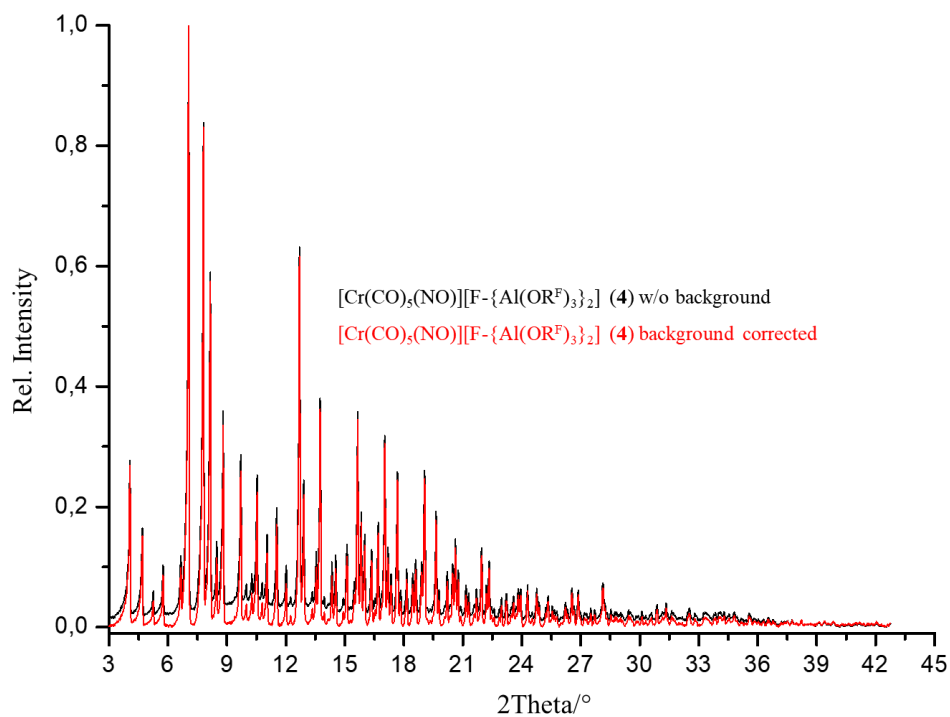

Supplementary Figure 58. Experimental powder diffractogram of **4** with (red) and without (black) background correction.

In order to emphasize the small difference in unit cell dimensions of (by single-crystal XRD) undistinguishable complexes **1** and **3** (**2** and **4** respectively), an overlay of the two powder diffractograms with a magnification of the 3-10° and 19-25° 2Theta range to emphasize the slight difference between the two diffractograms.

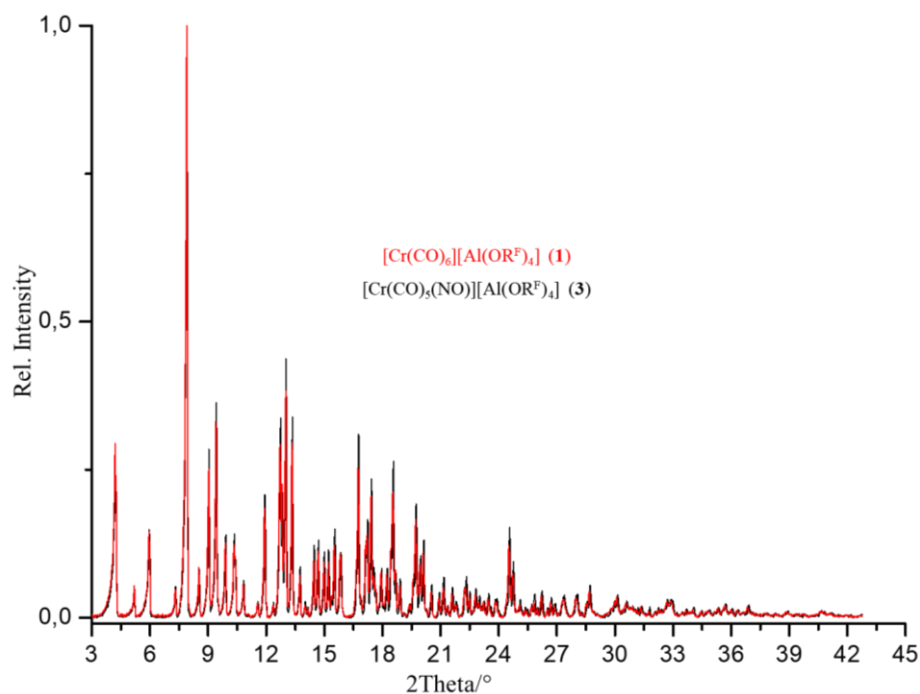

Supplementary Figure 59. Comparison of experimental powder diffractograms of **1** (red) and **3** (black).

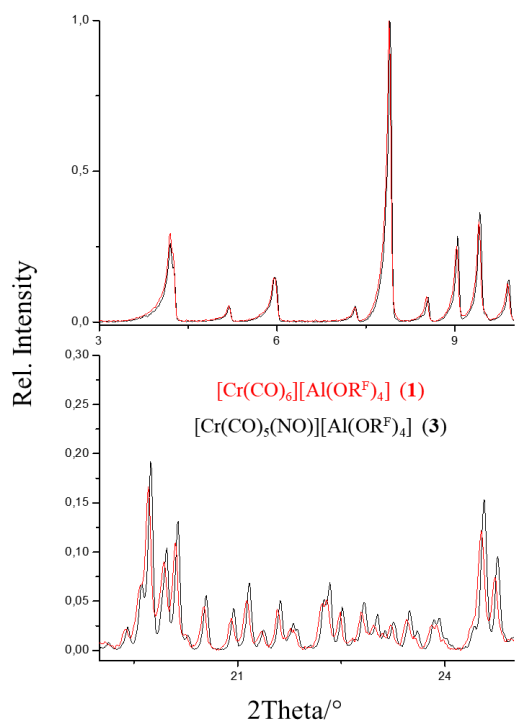

Supplementary Figure 60. Magnification of the 3-10° and 19-25° 2Theta range of the comparison of experimental powder diffractograms of **1** (red) and **3** (black).

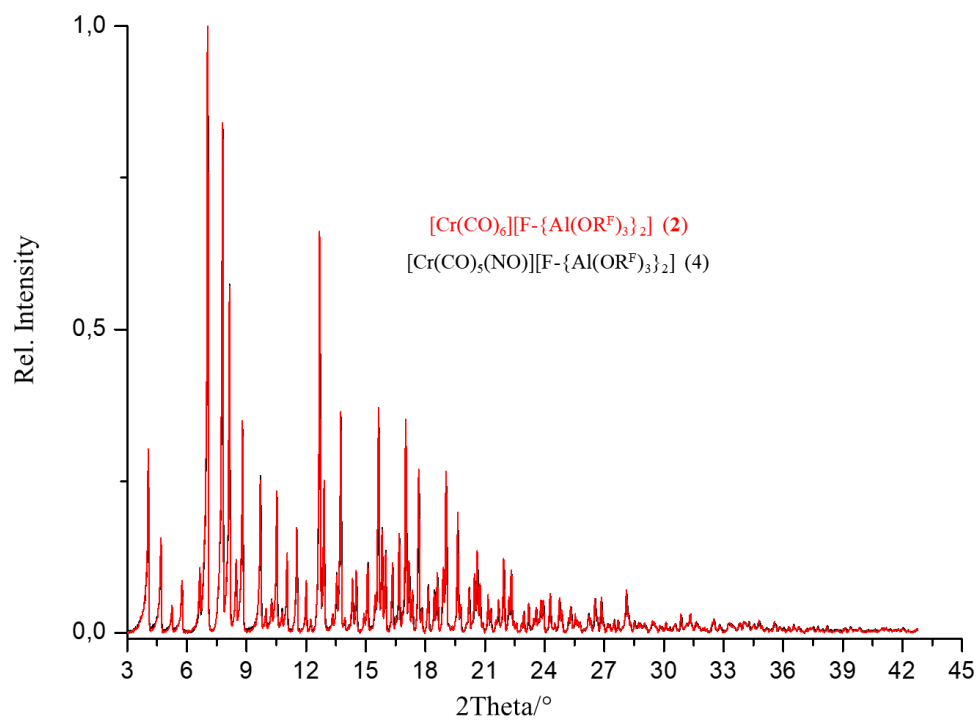

Supplementary Figure 61. Comparison of experimental powder diffractograms of **2** (red) and **4** (black).

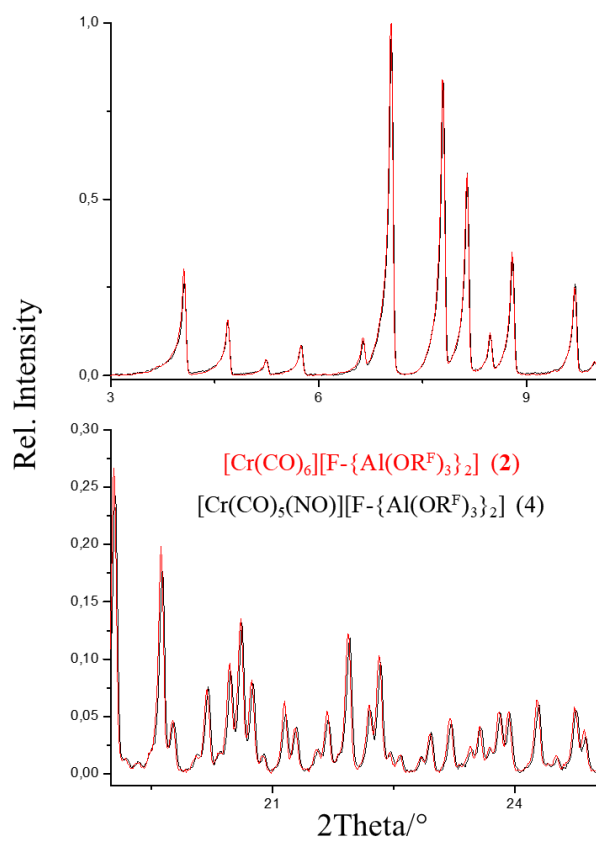

Supplementary Figure 62. Magnification of the 3-10° and 19-25° 2Theta range of the comparison of experimental powder diffractograms of **2** (red) and **4** (black).

## Rietveld Refinement

Since Cr–N distances in the mixed complexes are expected to be shorter (see QM calculations), also their unit cell is slightly, but noticeably smaller than that of the all-carbonyl compounds. To show this also for the microcrystalline bulk, we performed Rietveld-refinements of the powder data recorded at the same temperature like the single crystal data (100 K). Since the pXRD record higher angle data than the scXRD data, the resolution is better and the standard deviations are further reduced. Thus, also the bulk of the material show the smaller lattice parameters for the mixed NO-carbonyl complexes (see Supplementary Table 7 and Supplementary Figure 63 to Supplementary Figure 66).

All reflections measured by X-ray powder diffraction have been indexed and their observed intensities are in very good agreement with the calculated diffraction patterns based on single crystal data. The Rietveld refinements of the structure models (see section 14) have been performed with the program GSAS<sup>56,57</sup> and confirm the single crystal data. The atomic parameters remain almost unchanged and therefore the detailed structural parameters are not reproduced herein.

Cell volumes of  $[\text{Al}(\text{OR}^{\text{F}})_4]^-$  salts **1** and **3**: The cell volumes are  $V = 1776.42(4)$  (**1**, all carbonyl) and  $V = 1767.39(3)$  (**3**, mixed-NO-carbonyl). With a standard deviation of only 0.04 and 0.03  $\text{\AA}^3$ , the volume difference of 9.03  $\text{\AA}^3$  between both salts is more than statistically relevant.

Cell volumes of  $[\text{F}-\{\text{Al}(\text{OR}^{\text{F}})_3\}_2]$  salts **2** and **4**: here, the volumes are  $V = 5156.13(7)$  (**3**) and  $5145.08(7)$  (**4**). This difference of 11.05  $\text{\AA}^3$  is also statistically relevant and supports the claim that the presence of the shorter Cr–N bond leads to slightly but significantly smaller unit cells even for the bulk samples.

Supplementary Table 7. Results of the Rietveld refinement.

| Compound        | $[\text{Cr}(\text{CO})_6]$<br>$[\text{Al}(\text{OR}^{\text{F}})_4]$ | $[\text{Cr}(\text{CO})_5(\text{NO})]$<br>$[\text{Al}(\text{OR}^{\text{F}})_4]$ | $[\text{Cr}(\text{CO})_6]$<br>$[\text{F}-\text{Al}(\text{OR}^{\text{F}})_3]_2$ | $[\text{Cr}(\text{CO})_5(\text{NO})]$<br>$[\text{F}-\text{Al}(\text{OR}^{\text{F}})_3]_2$ |
|-----------------|---------------------------------------------------------------------|--------------------------------------------------------------------------------|--------------------------------------------------------------------------------|-------------------------------------------------------------------------------------------|
| Temp.           | 100 K                                                               | 100 K                                                                          | 100 K                                                                          | 100 K                                                                                     |
| Space Group     | $P4/n$                                                              | $P4/n$                                                                         | $Pa\bar{3}$                                                                    | $Pa\bar{3}$                                                                               |
| Cell            | a = 13.65605(15)<br>c = 9.52568(17)<br>V = 1776.42(4)               | a = 13.63318(11)<br>c = 9.50905(12)<br>V = 1767.39(3)                          | a = 17.27593(8)<br>V = 5156.13(7)                                              | a = 17.26357(8)<br>V = 5145.08(7)                                                         |
| $R_{\text{F}2}$ | 0.0403                                                              | 0.0428                                                                         | 0.0456                                                                         | 0.0457                                                                                    |
| $wR_{\text{p}}$ | 0.0363                                                              | 0.0408                                                                         | 0.0309                                                                         | 0.0341                                                                                    |
| $R_{\text{p}}$  | 0.0285                                                              | 0.0314                                                                         | 0.0243                                                                         | 0.0266                                                                                    |
| $\chi^2$        | 2.690                                                               | 4.038                                                                          | 2.564                                                                          | 2.890                                                                                     |



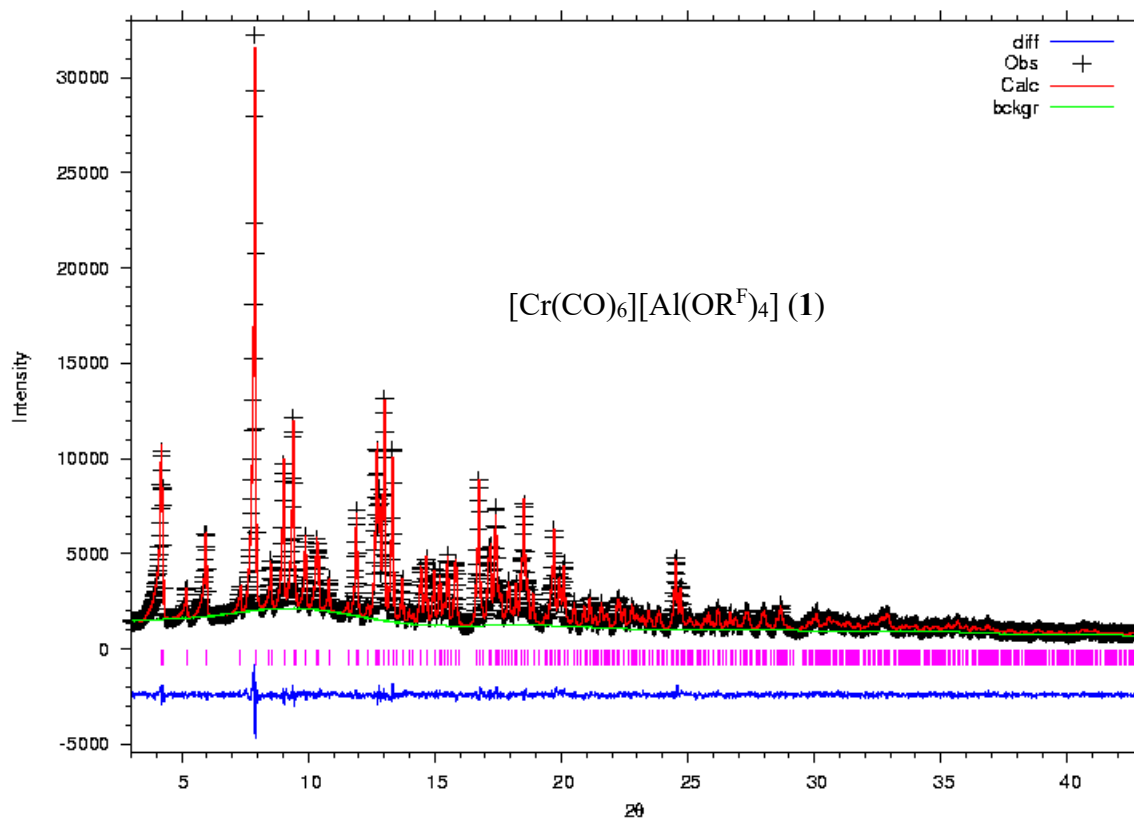

Supplementary Figure 63. Plot of the Rietveld refinement of 1.

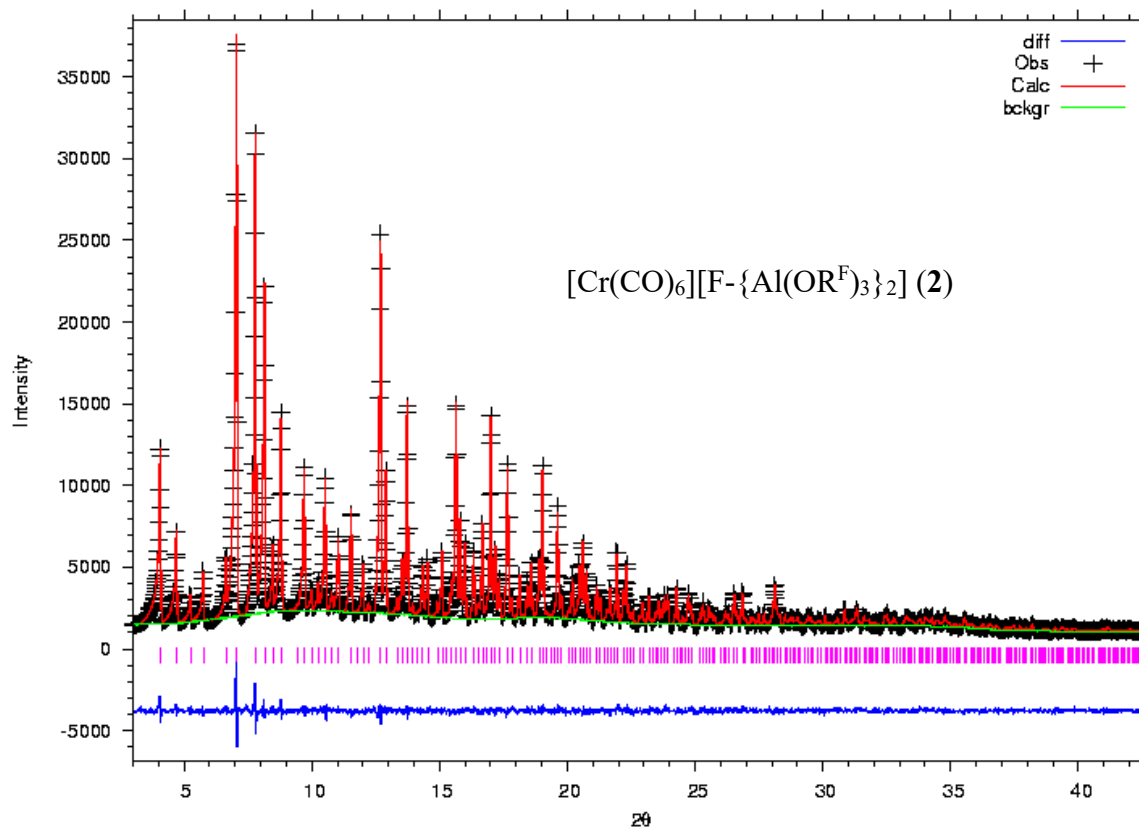

Supplementary Figure 64. Plot of the Rietveld refinement of 2.

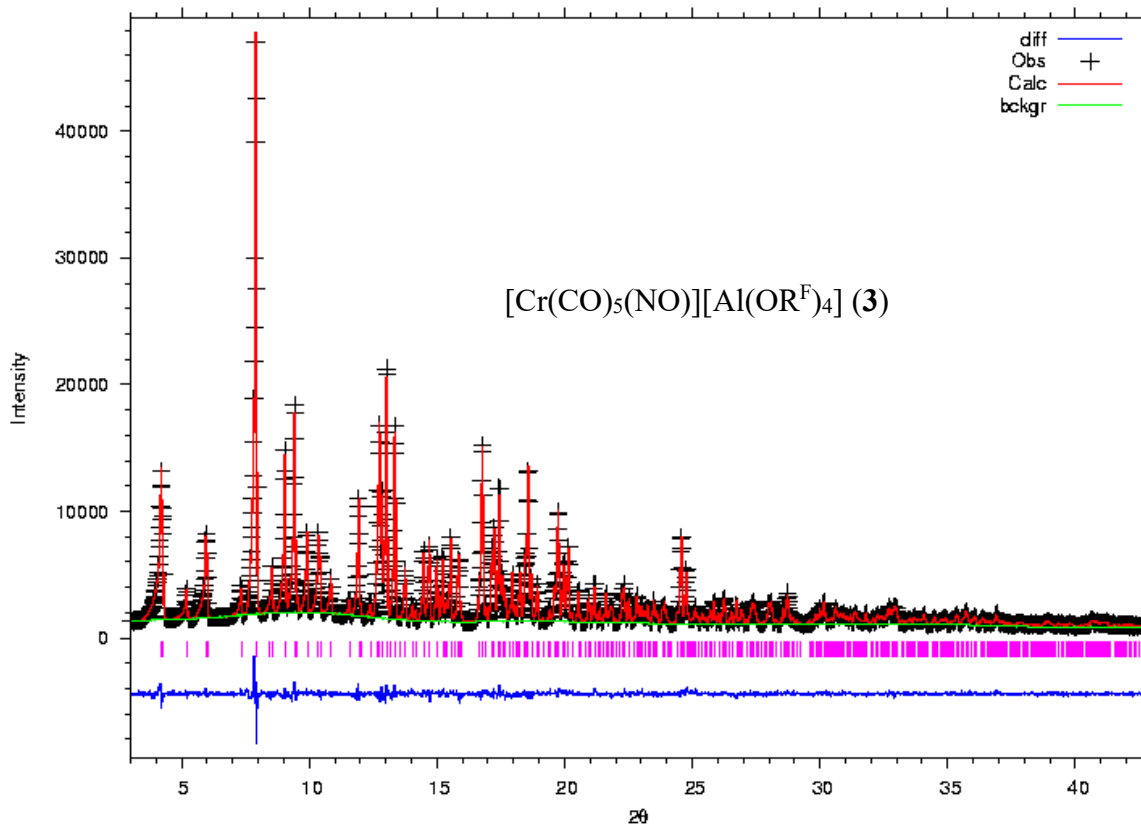

Supplementary Figure 65. Plot of the Rietveld refinement of 3.

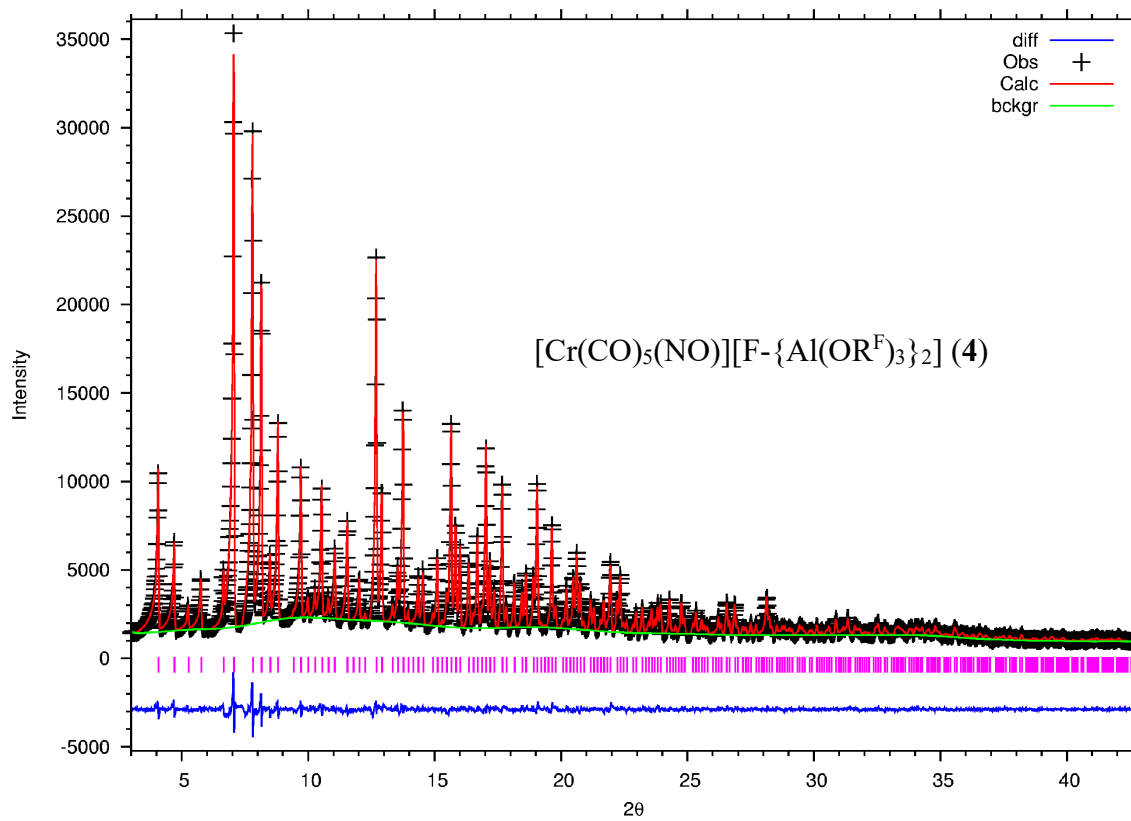

Supplementary Figure 66. Plot of the Rietveld refinement of 4.

## 14. Single-Crystal XRD Data

Supplementary Figure 67 shows the crystal structure of **1**, Supplementary Data 2 gives full information on the crystallographic data.

**Crystal structure of 1, the symmetry-generated atom sites are greyed out.**

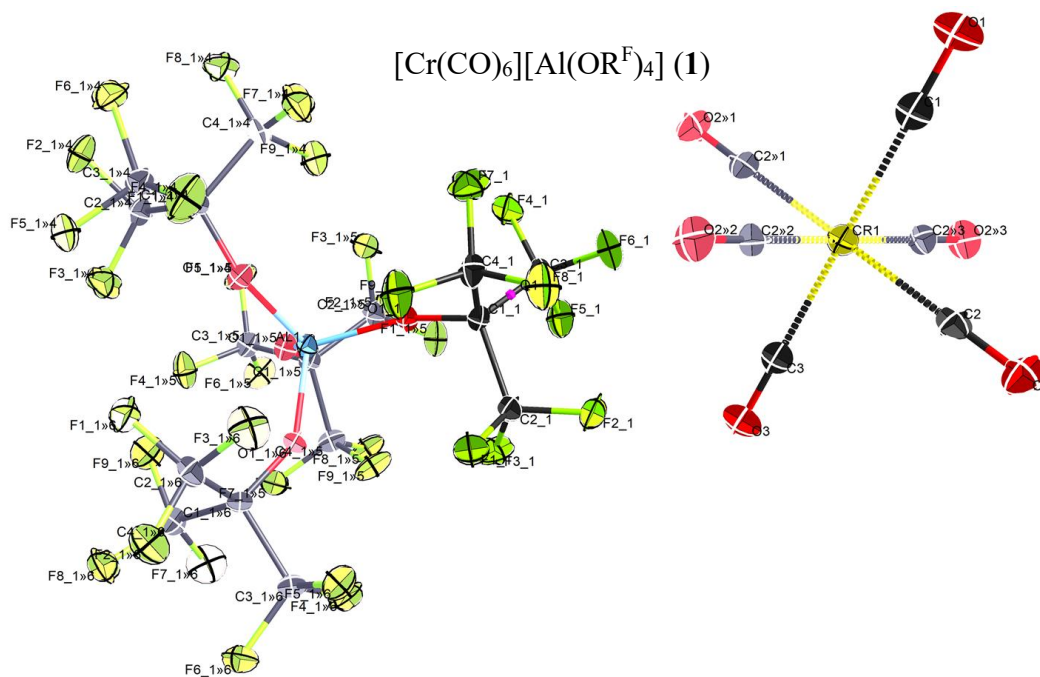

Supplementary Figure 67. Crystal structure of **1**.

### Crystal data and structure refinement for p4n\_a\_final.

|                                                          |                                                               |
|----------------------------------------------------------|---------------------------------------------------------------|
| Identification code                                      | p4n_a_final                                                   |
| Empirical formula                                        | C <sub>22</sub> AlCrF <sub>36</sub> O <sub>10</sub>           |
| Formula weight                                           | 1187.20                                                       |
| Temperature/K                                            | 100(2)                                                        |
| Crystal system                                           | tetragonal                                                    |
| Space group                                              | P4/n                                                          |
| a/Å                                                      | 13.6531(3)                                                    |
| b/Å                                                      | 13.6531(3)                                                    |
| c/Å                                                      | 9.5200(2)                                                     |
| α/°                                                      | 90                                                            |
| β/°                                                      | 90                                                            |
| γ/°                                                      | 90                                                            |
| Volume/Å <sup>3</sup>                                    | 1774.60(9)                                                    |
| Z                                                        | 2                                                             |
| ρ <sub>calc</sub> /cm <sup>3</sup>                       | 2.222                                                         |
| μ/mm <sup>-1</sup>                                       | 0.591                                                         |
| F(000)                                                   | 1146.0                                                        |
| Crystal size/mm <sup>3</sup>                             | 0.1 × 0.08 × 0.08                                             |
| Radiation                                                | MoKα (λ = 0.71073)                                            |
| 2θ range for data collection/°                           | 4.218 to 59.068                                               |
| Index ranges                                             | -13 ≤ h ≤ 18, -18 ≤ k ≤ 11, -13 ≤ l ≤ 7                       |
| Reflections collected                                    | 11628                                                         |
| Independent reflections                                  | 2492 [R <sub>int</sub> = 0.0143, R <sub>sigma</sub> = 0.0129] |
| Data/restraints/parameters                               | 2492/189/162                                                  |
| Goodness-of-fit on F <sup>2</sup>                        | 1.068                                                         |
| Final R indexes [I >= 2σ (I)]                            | R <sub>1</sub> = 0.0273, wR <sub>2</sub> = 0.0704             |
| Final R indexes [all data]                               | R <sub>1</sub> = 0.0308, wR <sub>2</sub> = 0.0723             |
| Largest diff. peak/hole / e <sup>-</sup> Å <sup>-3</sup> | 0.46/-0.43                                                    |

Supplementary Data 2. Information on the crystallographic data of **1**.

**Fractional Atomic Coordinates ( $\times 10^4$ ) and Equivalent Isotropic Displacement Parameters ( $\text{\AA}^2 \times 10^3$ ) for p4n\_a\_final.  $U_{eq}$  is defined as 1/3 of the trace of the orthogonalised  $U_{ij}$  tensor.**

| Atom | x           | y           | z           | $U_{eq}$   |
|------|-------------|-------------|-------------|------------|
| All  | 7500        | 2500        | 10000       | 14.20 (14) |
| O1_1 | 6669.4 (6)  | 3145.0 (6)  | 8984.6 (9)  | 18.52 (18) |
| C1_1 | 5826.0 (9)  | 3116.3 (9)  | 8245.2 (12) | 16.5 (2)   |
| C2_1 | 4945.0 (9)  | 2839.4 (10) | 9200.6 (14) | 21.7 (2)   |
| F1_1 | 4917.6 (6)  | 1878.8 (6)  | 9438.0 (9)  | 28.68 (19) |
| F2_1 | 4086.5 (6)  | 3094.0 (7)  | 8629.8 (9)  | 30.9 (2)   |
| F3_1 | 5009.8 (6)  | 3280.4 (7)  | 10445.5 (9) | 31.0 (2)   |
| C3_1 | 5648.0 (9)  | 4156.2 (9)  | 7620.5 (14) | 21.2 (2)   |
| F4_1 | 6477.4 (6)  | 4529.2 (6)  | 7103.9 (10) | 30.2 (2)   |
| F5_1 | 5325.8 (6)  | 4774.3 (6)  | 8596.5 (9)  | 28.38 (19) |
| F6_1 | 4988.3 (6)  | 4151.4 (6)  | 6575.8 (9)  | 29.27 (19) |
| C4_1 | 5891.6 (10) | 2366.2 (10) | 7017.8 (14) | 22.7 (3)   |
| F7_1 | 6436.6 (7)  | 2715.4 (7)  | 5977.0 (9)  | 33.8 (2)   |
| F8_1 | 5009.0 (7)  | 2142.4 (6)  | 6475.2 (9)  | 30.58 (19) |
| F9_1 | 6298.0 (7)  | 1536.7 (6)  | 7459.5 (10) | 31.8 (2)   |
| Cr1  | 2500        | 2500        | 3706.5 (4)  | 16.09 (9)  |
| O1   | 2500        | 2500        | 465 (2)     | 36.2 (5)   |
| C1   | 2500        | 2500        | 1645 (3)    | 24.1 (5)   |
| O2   | 435.6 (7)   | 1535.0 (8)  | 3698.6 (11) | 29.2 (2)   |
| C2   | 1177.5 (10) | 1885.8 (9)  | 3704.7 (13) | 20.8 (2)   |
| C3   | 2500        | 2500        | 5774 (3)    | 22.2 (5)   |
| O3   | 2500        | 2500        | 6955 (2)    | 31.9 (5)   |

**Anisotropic Displacement Parameters ( $\text{\AA}^2 \times 10^3$ ) for p4n\_a\_final. The Anisotropic displacement factor exponent takes the form:  $-2\pi^2[h^2a^*U_{11}+2hka^*b^*U_{12}+\dots]$ .**

| Atom | $U_{11}$   | $U_{22}$   | $U_{33}$   | $U_{23}$ | $U_{13}$  | $U_{12}$ |
|------|------------|------------|------------|----------|-----------|----------|
| All  | 12.76 (19) | 12.76 (19) | 17.1 (3)   | 0        | 0         | 0        |
| O1_1 | 14.9 (4)   | 16.8 (4)   | 23.9 (4)   | 1.8 (3)  | -3.6 (3)  | 0.1 (3)  |
| C1_1 | 14.9 (5)   | 15.5 (5)   | 19.1 (5)   | -0.2 (4) | -0.5 (4)  | 1.6 (4)  |
| C2_1 | 16.7 (5)   | 24.0 (6)   | 24.5 (6)   | 0.1 (5)  | 0.2 (4)   | -0.3 (5) |
| F1_1 | 24.6 (4)   | 24.1 (4)   | 37.4 (5)   | 7.4 (3)  | -1.9 (3)  | -6.9 (3) |
| F2_1 | 14.3 (4)   | 37.0 (5)   | 41.4 (5)   | 2.5 (4)  | -1.4 (3)  | 2.8 (3)  |
| F3_1 | 30.3 (4)   | 38.9 (5)   | 23.8 (4)   | -5.5 (3) | 6.6 (3)   | -2.2 (4) |
| C3_1 | 20.4 (6)   | 18.4 (6)   | 24.7 (6)   | 1.1 (5)  | -3.3 (5)  | 2.4 (4)  |
| F4_1 | 27.3 (4)   | 25.4 (4)   | 37.9 (5)   | 12.3 (3) | 0.8 (3)   | -2.2 (3) |
| F5_1 | 31.8 (4)   | 18.9 (4)   | 34.5 (4)   | -5.5 (3) | -4.6 (3)  | 8.2 (3)  |
| F6_1 | 30.9 (4)   | 26.5 (4)   | 30.3 (4)   | 3.2 (3)  | -13.2 (3) | 5.1 (3)  |
| C4_1 | 23.4 (6)   | 21.2 (6)   | 23.6 (6)   | -4.0 (5) | -2.9 (5)  | 3.7 (5)  |
| F7_1 | 37.0 (5)   | 39.0 (5)   | 25.5 (4)   | -4.7 (4) | 9.1 (4)   | 3.6 (4)  |
| F8_1 | 30.9 (4)   | 28.6 (4)   | 32.3 (4)   | -8.3 (3) | -10.9 (3) | -0.1 (3) |
| F9_1 | 37.1 (5)   | 19.3 (4)   | 39.1 (5)   | -7.4 (3) | -7.4 (4)  | 9.8 (3)  |
| Cr1  | 15.97 (12) | 15.97 (12) | 16.34 (17) | 0        | 0         | 0        |
| O1   | 44.5 (8)   | 44.5 (8)   | 19.5 (9)   | 0        | 0         | 0        |
| C1   | 23.4 (8)   | 23.4 (8)   | 25.7 (12)  | 0        | 0         | 0        |
| O2   | 21.9 (5)   | 31.8 (5)   | 33.9 (5)   | -2.1 (4) | -0.3 (4)  | -4.9 (4) |
| C2   | 23.5 (6)   | 20.3 (6)   | 18.6 (5)   | -1.2 (4) | -0.3 (4)  | 1.5 (5)  |
| C3   | 21.3 (7)   | 21.3 (7)   | 24.1 (12)  | 0        | 0         | 0        |
| O3   | 37.6 (7)   | 37.6 (7)   | 20.4 (9)   | 0        | 0         | 0        |

**Bond Lengths for p4n\_a\_final.**

| Atom | Atom              | Length/ $\text{\AA}$ | Atom | Atom            | Length/ $\text{\AA}$ |
|------|-------------------|----------------------|------|-----------------|----------------------|
| All  | O1_1 <sup>1</sup> | 1.7309 (8)           | C3_1 | F6_1            | 1.3418 (15)          |
| All  | O1_1 <sup>2</sup> | 1.7309 (8)           | C4_1 | F7_1            | 1.3277 (16)          |
| All  | O1_1 <sup>3</sup> | 1.7309 (8)           | C4_1 | F9_1            | 1.3294 (15)          |
| All  | O1_1              | 1.7309 (8)           | C4_1 | F8_1            | 1.3461 (16)          |
| O1_1 | C1_1              | 1.3501 (14)          | Cr1  | C1              | 1.962 (3)            |
| C1_1 | C2_1              | 1.5546 (17)          | Cr1  | C3              | 1.969 (3)            |
| C1_1 | C4_1              | 1.5565 (17)          | Cr1  | C2              | 1.9909 (13)          |
| C1_1 | C3_1              | 1.5583 (17)          | Cr1  | C2 <sup>4</sup> | 1.9909 (13)          |
| C2_1 | F1_1              | 1.3314 (15)          | Cr1  | C2 <sup>5</sup> | 1.9909 (13)          |
| C2_1 | F3_1              | 1.3322 (15)          | Cr1  | C2 <sup>6</sup> | 1.9909 (13)          |
| C2_1 | F2_1              | 1.3379 (15)          | O1   | C1              | 1.124 (3)            |
| C3_1 | F5_1              | 1.3300 (15)          | O2   | C2              | 1.1204 (17)          |
| C3_1 | F4_1              | 1.3355 (15)          | C3   | O3              | 1.124 (3)            |

<sup>1</sup>1/2+Y,1-X,2-Z; <sup>2</sup>1-Y,-1/2+X,2-Z; <sup>3</sup>2-X,1/2-Y,+Z; <sup>4</sup>1/2-X,1/2-Y,+Z; <sup>5</sup>+Y,1/2-X,+Z; <sup>6</sup>1/2-Y,+X,+Z

**Bond Angles for p4n\_a\_final.**

| Atom              | Atom | Atom              | Angle/°     | Atom            | Atom | Atom            | Angle/°     |
|-------------------|------|-------------------|-------------|-----------------|------|-----------------|-------------|
| O1_1 <sup>1</sup> | All  | O1_1 <sup>2</sup> | 112.10 (6)  | F7_1            | C4_1 | F9_1            | 107.94 (11) |
| O1_1 <sup>1</sup> | All  | O1_1 <sup>3</sup> | 108.17 (3)  | F7_1            | C4_1 | F8_1            | 107.27 (11) |
| O1_1 <sup>2</sup> | All  | O1_1 <sup>3</sup> | 108.17 (3)  | F9_1            | C4_1 | F8_1            | 107.56 (11) |
| O1_1 <sup>1</sup> | All  | O1_1              | 108.17 (3)  | F7_1            | C4_1 | C1_1            | 110.87 (11) |
| O1_1 <sup>2</sup> | All  | O1_1              | 108.17 (3)  | F9_1            | C4_1 | C1_1            | 110.31 (10) |
| O1_1 <sup>3</sup> | All  | O1_1              | 112.10 (6)  | F8_1            | C4_1 | C1_1            | 112.70 (10) |
| C1_1              | O1_1 | All               | 146.63 (8)  | C1              | Cr1  | C3              | 180.0       |
| O1_1              | C1_1 | C2_1              | 111.22 (10) | C1              | Cr1  | C2              | 89.95 (4)   |
| O1_1              | C1_1 | C4_1              | 111.19 (10) | C3              | Cr1  | C2              | 90.05 (4)   |
| C2_1              | C1_1 | C4_1              | 108.89 (10) | C1              | Cr1  | C2 <sup>4</sup> | 89.95 (4)   |
| O1_1              | C1_1 | C3_1              | 107.79 (10) | C3              | Cr1  | C2 <sup>4</sup> | 90.05 (4)   |
| C2_1              | C1_1 | C3_1              | 108.92 (10) | C2              | Cr1  | C2 <sup>4</sup> | 179.91 (7)  |
| C4_1              | C1_1 | C3_1              | 108.78 (10) | C1              | Cr1  | C2 <sup>5</sup> | 89.95 (4)   |
| F1_1              | C2_1 | F3_1              | 107.22 (11) | C3              | Cr1  | C2 <sup>5</sup> | 90.05 (4)   |
| F1_1              | C2_1 | F2_1              | 107.47 (10) | C2              | Cr1  | C2 <sup>5</sup> | 90.0        |
| F3_1              | C2_1 | F2_1              | 107.59 (11) | C2 <sup>4</sup> | Cr1  | C2 <sup>5</sup> | 90.0        |
| F1_1              | C2_1 | C1_1              | 111.14 (10) | C1              | Cr1  | C2 <sup>6</sup> | 89.95 (4)   |
| F3_1              | C2_1 | C1_1              | 111.04 (10) | C3              | Cr1  | C2 <sup>6</sup> | 90.05 (4)   |
| F2_1              | C2_1 | C1_1              | 112.15 (10) | C2              | Cr1  | C2 <sup>6</sup> | 90.0        |
| F5_1              | C3_1 | F4_1              | 107.20 (10) | C2 <sup>4</sup> | Cr1  | C2 <sup>6</sup> | 90.000 (1)  |
| F5_1              | C3_1 | F6_1              | 107.39 (10) | C2 <sup>5</sup> | Cr1  | C2 <sup>6</sup> | 179.91 (7)  |
| F4_1              | C3_1 | F6_1              | 107.34 (11) | O1              | C1   | Cr1             | 180.0       |
| F5_1              | C3_1 | C1_1              | 111.28 (10) | O2              | C2   | Cr1             | 179.53 (13) |
| F4_1              | C3_1 | C1_1              | 110.84 (10) | O3              | C3   | Cr1             | 180.0       |
| F6_1              | C3_1 | C1_1              | 112.53 (10) |                 |      |                 |             |

<sup>1</sup>1/2+Y,1-X,2-Z; <sup>2</sup>1-Y,-1/2+X,2-Z; <sup>3</sup>2-X,1/2-Y,+Z; <sup>4</sup>1/2-X,1/2-Y,+Z; <sup>5</sup>+Y,1/2-X,+Z; <sup>6</sup>1/2-Y,+X,+Z

**Torsion Angles for p4n\_a\_final.**

| A                 | B    | C    | D    | Angle/°      | A    | B    | C    | D    | Angle/°     |
|-------------------|------|------|------|--------------|------|------|------|------|-------------|
| O1_1 <sup>1</sup> | All  | O1_1 | C1_1 | -157.73 (16) | C4_1 | C1_1 | C3_1 | F5_1 | 163.12 (10) |
| O1_1 <sup>2</sup> | All  | O1_1 | C1_1 | -36.10 (13)  | O1_1 | C1_1 | C3_1 | F4_1 | 42.99 (13)  |
| O1_1 <sup>3</sup> | All  | O1_1 | C1_1 | 83.08 (15)   | C2_1 | C1_1 | C3_1 | F4_1 | 163.77 (10) |
| All               | O1_1 | C1_1 | C2_1 | 61.36 (18)   | C4_1 | C1_1 | C3_1 | F4_1 | -77.67 (13) |
| All               | O1_1 | C1_1 | C4_1 | -60.17 (18)  | O1_1 | C1_1 | C3_1 | F6_1 | 163.20 (10) |
| All               | O1_1 | C1_1 | C3_1 | -179.32 (11) | C2_1 | C1_1 | C3_1 | F6_1 | -76.02 (13) |
| O1_1              | C1_1 | C2_1 | F1_1 | -78.96 (13)  | C4_1 | C1_1 | C3_1 | F6_1 | 42.53 (14)  |
| C4_1              | C1_1 | C2_1 | F1_1 | 43.90 (13)   | O1_1 | C1_1 | C4_1 | F7_1 | -74.82 (13) |
| C3_1              | C1_1 | C2_1 | F1_1 | 162.39 (10)  | C2_1 | C1_1 | C4_1 | F7_1 | 162.30 (10) |
| O1_1              | C1_1 | C2_1 | F3_1 | 40.30 (14)   | C3_1 | C1_1 | C4_1 | F7_1 | 43.73 (13)  |
| C4_1              | C1_1 | C2_1 | F3_1 | 163.16 (10)  | O1_1 | C1_1 | C4_1 | F9_1 | 44.69 (14)  |
| C3_1              | C1_1 | C2_1 | F3_1 | -78.35 (12)  | C2_1 | C1_1 | C4_1 | F9_1 | -78.19 (13) |
| O1_1              | C1_1 | C2_1 | F2_1 | 160.71 (10)  | C3_1 | C1_1 | C4_1 | F9_1 | 163.24 (11) |
| C4_1              | C1_1 | C2_1 | F2_1 | -76.43 (13)  | O1_1 | C1_1 | C4_1 | F8_1 | 164.92 (10) |
| C3_1              | C1_1 | C2_1 | F2_1 | 42.06 (14)   | C2_1 | C1_1 | C4_1 | F8_1 | 42.04 (14)  |
| O1_1              | C1_1 | C3_1 | F5_1 | -76.21 (12)  | C3_1 | C1_1 | C4_1 | F8_1 | -76.53 (13) |
| C2_1              | C1_1 | C3_1 | F5_1 | 44.57 (13)   |      |      |      |      |             |

<sup>1</sup>1/2+Y,1-X,2-Z; <sup>2</sup>1-Y,-1/2+X,2-Z; <sup>3</sup>2-X,1/2-Y,+Z

## Crystal structure of 2, the symmetry-generated atom sites are greyed out.

Supplementary Figure 68 shows the crystal structure of 2, Supplementary Data 3 gives full information on the crystallographic data.

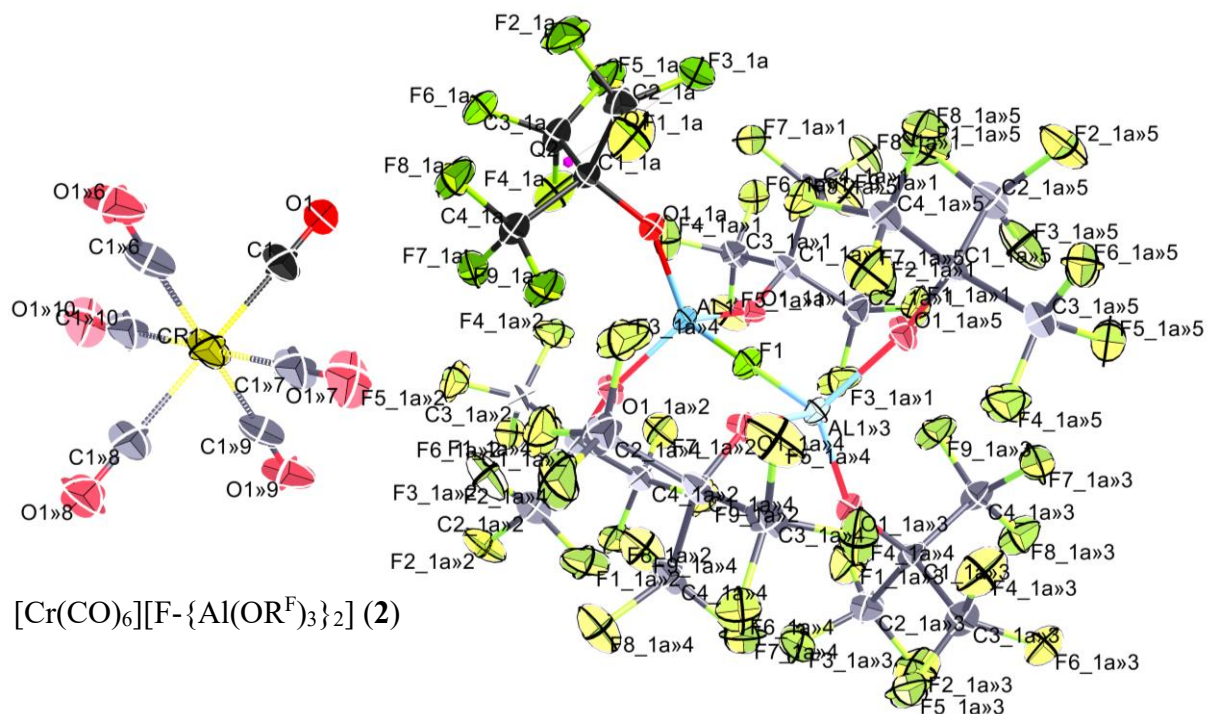

Supplementary Figure 68. Crystal structure of 2.

### Crystal data and structure refinement for pa-3\_a\_final.

|                                                          |                                                                   |
|----------------------------------------------------------|-------------------------------------------------------------------|
| Identification code                                      | pa-3_a_final                                                      |
| Empirical formula                                        | C <sub>30</sub> Al <sub>2</sub> CrF <sub>35</sub> O <sub>12</sub> |
| Formula weight                                           | 1703.26                                                           |
| Temperature/K                                            | 100(2)                                                            |
| Crystal system                                           | cubic                                                             |
| Space group                                              | Pa-3                                                              |
| a/Å                                                      | 17.2568(3)                                                        |
| b/Å                                                      | 17.2568(3)                                                        |
| c/Å                                                      | 17.2568(3)                                                        |
| α/°                                                      | 90                                                                |
| β/°                                                      | 90                                                                |
| γ/°                                                      | 90                                                                |
| Volume/Å <sup>3</sup>                                    | 5139.0(3)                                                         |
| Z                                                        | 4                                                                 |
| ρ <sub>calc</sub> /cm <sup>3</sup>                       | 2.201                                                             |
| μ/mm <sup>-1</sup>                                       | 0.514                                                             |
| F(000)                                                   | 3284.0                                                            |
| Crystal size/mm <sup>3</sup>                             | 0.1 × 0.1 × 0.1                                                   |
| Radiation                                                | MoKα (λ = 0.71073)                                                |
| 2θ range for data collection/°                           | 4.088 to 57.584                                                   |
| Index ranges                                             | -23 ≤ h ≤ 23, -21 ≤ k ≤ 22, -22 ≤ l ≤ 23                          |
| Reflections collected                                    | 97143                                                             |
| Independent reflections                                  | 2246 [R <sub>int</sub> = 0.0947, R <sub>sigma</sub> = 0.0150]     |
| Data/restraints/parameters                               | 2246/518/267                                                      |
| Goodness-of-fit on F <sup>2</sup>                        | 1.138                                                             |
| Final R indexes [I ≥ 2σ(I)]                              | R <sub>1</sub> = 0.0303, wR <sub>2</sub> = 0.0772                 |
| Final R indexes [all data]                               | R <sub>1</sub> = 0.0344, wR <sub>2</sub> = 0.0788                 |
| Largest diff. peak/hole / e <sup>-</sup> Å <sup>-3</sup> | 0.27/-0.29                                                        |

Supplementary Data 3. Information on the crystallographic data of 2.

**Fractional Atomic Coordinates ( $\times 10^4$ ) and Equivalent Isotropic Displacement Parameters ( $\text{\AA}^2 \times 10^3$ ) for pa-3\_a\_final.  $U_{eq}$  is defined as 1/3 of the trace of the orthogonalised  $U_{ij}$  tensor.**

| Atom | x           | y           | z           | U(eq)      |
|------|-------------|-------------|-------------|------------|
| All  | 588.6 (2)   | 9411.4 (2)  | 4411.4 (2)  | 16.82 (14) |
| F1   | 0           | 10000       | 5000        | 22.8 (4)   |
| O1_1 | 921 (14)    | 8709 (13)   | 5036 (14)   | 24.9 (11)  |
| C1_1 | 1518 (9)    | 8367 (8)    | 5421 (8)    | 22.1 (8)   |
| C2_1 | 1186 (2)    | 8000 (2)    | 6160 (2)    | 32.4 (8)   |
| F1_1 | 1059 (5)    | 8528 (3)    | 6695 (5)    | 43.2 (12)  |
| F2_1 | 1681 (3)    | 7481 (2)    | 6451 (2)    | 45.3 (9)   |
| F3_1 | 533 (6)     | 7612 (9)    | 6009 (11)   | 43.4 (17)  |
| C3_1 | 1870 (2)    | 7740 (2)    | 4885 (2)    | 29.6 (8)   |
| F4_1 | 1928 (14)   | 8031 (11)   | 4171 (7)    | 40 (2)     |
| F5_1 | 1415.1 (19) | 7113.0 (16) | 4856 (2)    | 39.4 (7)   |
| F6_1 | 2595 (5)    | 7563 (5)    | 5086 (9)    | 30.7 (12)  |
| C4_1 | 2132.4 (19) | 8980 (2)    | 5623.5 (19) | 26.9 (8)   |
| F7_1 | 2567.3 (14) | 9156 (2)    | 5012.2 (16) | 35.0 (6)   |
| F8_1 | 2611 (2)    | 8730 (3)    | 6174 (2)    | 36.9 (8)   |
| F9_1 | 1803 (8)    | 9629 (7)    | 5885 (7)    | 34.7 (14)  |
| O1_2 | 851 (9)     | 8662 (8)    | 4985 (9)    | 24.9 (11)  |
| F4_2 | 2564.7 (10) | 8782.7 (15) | 4769.4 (14) | 43.9 (5)   |
| C1_2 | 1425 (6)    | 8305 (5)    | 5383 (5)    | 22.1 (8)   |
| F5_2 | 1939 (10)   | 7890 (8)    | 4167 (5)    | 40.2 (15)  |
| F6_2 | 2583 (4)    | 7564 (4)    | 5197 (6)    | 47 (2)     |
| C3_2 | 2146.2 (16) | 8138.4 (18) | 4865.0 (15) | 32.7 (6)   |
| F1_2 | 1066.3 (17) | 6999.2 (11) | 5119.3 (13) | 43.8 (5)   |
| C2_2 | 1102.9 (17) | 7520.3 (15) | 5690.2 (15) | 33.6 (6)   |
| F7_2 | 1173 (4)    | 8778 (2)    | 6660 (3)    | 47.9 (10)  |
| F8_2 | 1758 (7)    | 9537 (5)    | 5856 (6)    | 50 (2)     |
| F9_2 | 2373.0 (17) | 8576 (2)    | 6377.3 (19) | 45.0 (7)   |
| F3_2 | 384 (4)     | 7629 (7)    | 5968 (7)    | 44.3 (13)  |
| F2_2 | 1540.8 (19) | 7215.6 (16) | 6251.8 (17) | 45.1 (6)   |
| C4_2 | 1690.5 (15) | 8798.2 (15) | 6092.4 (16) | 33.9 (6)   |
| Cr1  | 5000        | 10000       | 5000        | 42.82 (18) |
| O1   | 4174.2 (9)  | 8476.7 (9)  | 4517.4 (11) | 63.2 (4)   |
| C1   | 4475.4 (11) | 9028.1 (12) | 4685.0 (12) | 49.8 (5)   |

**Anisotropic Displacement Parameters ( $\text{\AA}^2 \times 10^3$ ) for pa-3\_a\_final. The Anisotropic displacement factor exponent takes the form:  $-2\pi^2[h^2a^2U_{11}+2hka*b*U_{12}+\dots]$ .**

| Atom | $U_{11}$   | $U_{22}$   | $U_{33}$   | $U_{23}$   | $U_{13}$   | $U_{12}$  |
|------|------------|------------|------------|------------|------------|-----------|
| All  | 16.82 (14) | 16.82 (14) | 16.82 (14) | -2.05 (13) | 2.05 (13)  | 2.05 (13) |
| F1   | 22.8 (4)   | 22.8 (4)   | 22.8 (4)   | -4.8 (4)   | 4.8 (4)    | 4.8 (4)   |
| O1_1 | 19 (2)     | 22.8 (15)  | 32.4 (18)  | 5.1 (13)   | -5.7 (14)  | 1.7 (15)  |
| C1_1 | 20 (2)     | 22.5 (13)  | 23.8 (10)  | -0.8 (8)   | -4.8 (13)  | 3.7 (9)   |
| C2_1 | 31.9 (18)  | 35.8 (19)  | 29.6 (18)  | 7.3 (14)   | 2.1 (14)   | 4.3 (14)  |
| F1_1 | 44 (3)     | 59 (3)     | 26.2 (15)  | -1 (2)     | 9.2 (15)   | 14 (3)    |
| F2_1 | 52 (2)     | 49 (2)     | 35 (2)     | 19.7 (16)  | -2.9 (14)  | 12.7 (17) |
| F3_1 | 30 (3)     | 47 (2)     | 53 (3)     | 26 (2)     | 5 (3)      | 0 (2)     |
| C3_1 | 26.0 (17)  | 31.5 (19)  | 31.2 (18)  | -4.5 (15)  | -4.0 (14)  | 7.3 (15)  |
| F4_1 | 50 (3)     | 47 (6)     | 24 (2)     | -2 (2)     | 1.1 (19)   | 17 (4)    |
| F5_1 | 39.8 (16)  | 22.4 (12)  | 55.9 (19)  | -8.8 (12)  | -13.5 (13) | 6.1 (11)  |
| F6_1 | 30 (2)     | 32 (2)     | 30 (3)     | -1.7 (16)  | 0.9 (15)   | 11.4 (19) |
| C4_1 | 25.4 (16)  | 27.3 (16)  | 28.0 (16)  | -3.5 (13)  | -5.7 (13)  | 5.9 (12)  |
| F7_1 | 24.9 (11)  | 39.6 (16)  | 40.4 (14)  | 4.7 (12)   | -0.1 (10)  | -5.7 (11) |
| F8_1 | 38 (2)     | 37.0 (17)  | 36.0 (19)  | -4.9 (13)  | -16.6 (14) | 7.8 (15)  |
| F9_1 | 38 (3)     | 23 (2)     | 43 (3)     | -12 (2)    | -9 (2)     | 8 (2)     |
| O1_2 | 19 (2)     | 22.8 (15)  | 32.4 (18)  | 5.1 (13)   | -5.7 (14)  | 1.7 (15)  |
| F4_2 | 26.1 (8)   | 47.0 (12)  | 58.6 (13)  | 6.9 (10)   | 5.9 (8)    | 2.6 (8)   |
| C1_2 | 20 (2)     | 22.5 (13)  | 23.8 (10)  | -0.8 (8)   | -4.8 (13)  | 3.7 (9)   |
| F5_2 | 44.1 (19)  | 48 (4)     | 28.6 (16)  | -9.9 (15)  | 0.1 (13)   | 15 (3)    |
| F6_2 | 44 (2)     | 60 (3)     | 38 (3)     | -11.3 (15) | -9.8 (17)  | 35 (2)    |
| C3_2 | 28.2 (13)  | 36.2 (15)  | 33.8 (13)  | -1.5 (11)  | -3.4 (10)  | 10.4 (12) |
| F1_2 | 64.7 (16)  | 21.9 (8)   | 44.7 (12)  | -0.9 (7)   | -15.1 (10) | -0.8 (9)  |
| C2_2 | 42.1 (15)  | 28.3 (12)  | 30.4 (13)  | 5.2 (10)   | -7.4 (11)  | 3.1 (11)  |
| F7_2 | 52 (2)     | 57 (2)     | 34.8 (16)  | -17.6 (19) | 1.0 (12)   | 11.2 (18) |
| F8_2 | 55 (3)     | 28 (2)     | 68 (3)     | -16.9 (16) | -16.6 (18) | 0.5 (16)  |

|      |            |            |            |            |            |             |
|------|------------|------------|------------|------------|------------|-------------|
| F9_2 | 37.5 (15)  | 52.3 (17)  | 45.1 (17)  | -17.2 (12) | -19.2 (11) | 11.5 (12)   |
| F3_2 | 35 (3)     | 52 (2)     | 46.0 (18)  | 15.5 (15)  | 2 (2)      | -4 (2)      |
| F2_2 | 59.2 (15)  | 38.0 (14)  | 38.2 (14)  | 13.1 (10)  | -14.3 (10) | 7.5 (11)    |
| C4_2 | 30.4 (13)  | 33.0 (13)  | 38.2 (14)  | -8.2 (11)  | -6.8 (11)  | 6.8 (10)    |
| Cr1  | 42.82 (18) | 42.82 (18) | 42.82 (18) | 10.95 (15) | 10.95 (15) | -10.95 (15) |
| O1   | 50.3 (8)   | 47.6 (8)   | 91.7 (12)  | 4.3 (8)    | 12.1 (8)   | -13.6 (7)   |
| C1   | 42.9 (10)  | 48.4 (10)  | 58.1 (11)  | 13.1 (9)   | 12.5 (8)   | -5.3 (8)    |

**Bond Lengths for pa-3\_a\_final.**

| Atom | Atom              | Length/Å   | Atom Atom | Length/Å   |
|------|-------------------|------------|-----------|------------|
| All  | O1_2              | 1.690 (12) | O1_2 C1_2 | 1.354 (8)  |
| All  | O1_2 <sup>1</sup> | 1.690 (12) | F4_2 C3_2 | 1.336 (4)  |
| All  | O1_2 <sup>2</sup> | 1.690 (13) | C1_2 C2_2 | 1.557 (8)  |
| All  | O1_1              | 1.721 (18) | C1_2 C3_2 | 1.559 (8)  |
| All  | O1_1 <sup>1</sup> | 1.721 (18) | C1_2 C4_2 | 1.559 (8)  |
| All  | O1_1 <sup>2</sup> | 1.721 (18) | F5_2 C3_2 | 1.327 (10) |
| All  | F1                | 1.7594 (6) | F6_2 C3_2 | 1.371 (7)  |
| O1_1 | C1_1              | 1.360 (12) | F1_2 C2_2 | 1.335 (3)  |
| C1_1 | C2_1              | 1.535 (12) | C2_2 F2_2 | 1.337 (4)  |
| C1_1 | C4_1              | 1.538 (11) | C2_2 F3_2 | 1.343 (9)  |
| C1_1 | C3_1              | 1.548 (12) | F7_2 C4_2 | 1.326 (6)  |
| C2_1 | F1_1              | 1.317 (7)  | F8_2 C4_2 | 1.344 (9)  |
| C2_1 | F2_1              | 1.336 (5)  | F9_2 C4_2 | 1.333 (4)  |
| C2_1 | F3_1              | 1.336 (11) | Cr1       | 1.982 (2)  |
| C3_1 | F6_1              | 1.334 (9)  | Cr1       | 1.982 (2)  |
| C3_1 | F4_1              | 1.334 (12) | Cr1       | 1.982 (2)  |
| C3_1 | F5_1              | 1.338 (6)  | Cr1       | 1.982 (2)  |
| C4_1 | F7_1              | 1.330 (4)  | Cr1       | 1.982 (2)  |
| C4_1 | F8_1              | 1.332 (5)  | Cr1       | 1.982 (2)  |
| C4_1 | F9_1              | 1.334 (10) | O1        | 1.122 (2)  |

<sup>1</sup>1/2-Z,-1-X,-1/2+Y; <sup>2</sup>1-Y,1/2+Z,1/2-X; <sup>3</sup>1-X,2-Y,1-Z; <sup>4</sup>+Z,3/2-X,-1/2+Y; <sup>5</sup>1-Z,1/2+X,3/2-Y; <sup>6</sup>3/2-Y,1/2+Z,+X; <sup>7</sup>-1/2+Y,3/2-Z,1-X

**Bond Angles for pa-3\_a\_final.**

| Atom Atom Atom                          | Angle/°    | Atom Atom Atom  | Angle/°    |
|-----------------------------------------|------------|-----------------|------------|
| O1_2 All O1_2 <sup>1</sup>              | 113.6 (5)  | C1_2 O1_2 All   | 147.3 (12) |
| O1_2 All O1_1 <sup>1</sup>              | 109.0 (12) | O1_2 C1_2 C2_2  | 107.9 (8)  |
| O1_2 <sup>1</sup> All O1_1 <sup>1</sup> | 5.6 (13)   | O1_2 C1_2 C3_2  | 112.1 (10) |
| O1_2 <sup>2</sup> All O1_1 <sup>1</sup> | 119.0 (12) | C2_2 C1_2 C3_2  | 108.6 (6)  |
| O1_1 All O1_1 <sup>1</sup>              | 114.5 (7)  | O1_2 C1_2 C4_2  | 111.4 (9)  |
| O1_2 All O1_1 <sup>2</sup>              | 119.0 (12) | C2_2 C1_2 C4_2  | 108.2 (6)  |
| O1_2 <sup>1</sup> All O1_1 <sup>2</sup> | 109.0 (12) | C3_2 C1_2 C4_2  | 108.5 (6)  |
| O1_2 <sup>2</sup> All O1_1 <sup>2</sup> | 5.6 (13)   | F5_2 C3_2 F4_2  | 107.6 (6)  |
| O1_1 All O1_1 <sup>2</sup>              | 114.5 (7)  | F5_2 C3_2 F6_2  | 107.1 (7)  |
| O1_1 <sup>1</sup> All O1_1 <sup>2</sup> | 114.5 (7)  | F4_2 C3_2 F6_2  | 110.8 (4)  |
| O1_2 All F1                             | 105.0 (6)  | F5_2 C3_2 C1_2  | 111.4 (8)  |
| O1_2 <sup>1</sup> All F1                | 105.0 (6)  | F4_2 C3_2 C1_2  | 110.4 (4)  |
| O1_2 <sup>2</sup> All F1                | 105.0 (6)  | F6_2 C3_2 C1_2  | 109.4 (6)  |
| O1_1 All F1                             | 103.8 (9)  | F1_2 C2_2 F2_2  | 107.3 (2)  |
| O1_1 <sup>1</sup> All F1                | 103.8 (9)  | F1_2 C2_2 F3_2  | 108.3 (5)  |
| O1_1 <sup>2</sup> All F1                | 103.8 (9)  | F2_2 C2_2 F3_2  | 108.5 (6)  |
| All <sup>3</sup> F1 All                 | 180.0      | F1_2 C2_2 C1_2  | 110.6 (3)  |
| C1_1 O1_1 All                           | 149.8 (18) | F2_2 C2_2 C1_2  | 112.8 (5)  |
| O1_1 C1_1 C2_1                          | 107.6 (13) | F3_2 C2_2 C1_2  | 109.2 (7)  |
| O1_1 C1_1 C4_1                          | 109.6 (14) | F7_2 C4_2 F9_2  | 108.3 (4)  |
| C2_1 C1_1 C4_1                          | 110.7 (9)  | F7_2 C4_2 F8_2  | 107.9 (5)  |
| O1_1 C1_1 C3_1                          | 107.9 (14) | F9_2 C4_2 F8_2  | 108.0 (6)  |
| C2_1 C1_1 C3_1                          | 110.7 (9)  | F7_2 C4_2 C1_2  | 111.6 (4)  |
| C4_1 C1_1 C3_1                          | 110.2 (8)  | F9_2 C4_2 C1_2  | 113.1 (5)  |
| F1_1 C2_1 F2_1                          | 107.8 (5)  | F8_2 C4_2 C1_2  | 107.8 (6)  |
| F1_1 C2_1 F3_1                          | 110.0 (9)  | C1              | 180.0      |
| F2_1 C2_1 F3_1                          | 106.1 (8)  | C1              | 91.67 (8)  |
| F1_1 C2_1 C1_1                          | 111.0 (6)  | C1 <sup>4</sup> | 88.33 (8)  |
| F2_1 C2_1 C1_1                          | 110.6 (8)  | C1              | 88.33 (8)  |
| F3_1 C2_1 C1_1                          | 111.1 (10) | C1 <sup>4</sup> | 91.67 (8)  |
| F6_1 C3_1 F4_1                          | 104.8 (12) | C1 <sup>5</sup> | 180.00 (6) |
| F6_1 C3_1 F5_1                          | 112.0 (5)  | C1              | 91.67 (8)  |
| F4_1 C3_1 F5_1                          | 108.3 (9)  | C1 <sup>4</sup> | 88.33 (8)  |



|                |            |     |     |     |             |
|----------------|------------|-----|-----|-----|-------------|
| F6_1 C3_1 C1_1 | 111.9 (9)  | Cr1 | Cr1 | Cr1 | 88.33 (8)   |
| F4_1 C3_1 C1_1 | 108.6 (11) | Cr1 | Cr1 | Cr1 | 91.67 (8)   |
| F5_1 C3_1 C1_1 | 110.9 (5)  | Cr1 | Cr1 | Cr1 | 88.33 (8)   |
| F7_1 C4_1 F8_1 | 106.8 (3)  | Cr1 | Cr1 | Cr1 | 91.67 (8)   |
| F7_1 C4_1 F9_1 | 108.4 (6)  | Cr1 | Cr1 | Cr1 | 91.67 (8)   |
| F8_1 C4_1 F9_1 | 107.2 (7)  | Cr1 | Cr1 | Cr1 | 88.33 (8)   |
| F7_1 C4_1 C1_1 | 111.5 (5)  | Cr1 | Cr1 | Cr1 | 180.0       |
| F8_1 C4_1 C1_1 | 111.5 (8)  | O1  | Cr1 | Cr1 | 178.98 (19) |
| F9_1 C4_1 C1_1 | 111.1 (9)  |     |     |     |             |

<sup>1</sup>1/2-Z,1-X,-1/2+Y; <sup>2</sup>1-Y,1/2+Z,1/2-X; <sup>3</sup>-X,2-Y,1-Z; <sup>4</sup>1-X,2-Y,1-Z; <sup>5</sup>+Z,3/2-X,-1/2+Y; <sup>6</sup>1-Z,1/2+X,3/2-Y; <sup>7</sup>3/2-Y,1/2+Z,+X; <sup>8</sup>-1/2+Y,3/2-Z,1-X

**Torsion Angles for pa-3\_a\_final.**

| A                     | B    | C    | D    | Angle/°    | A                     | B    | C    | D    | Angle/°    |
|-----------------------|------|------|------|------------|-----------------------|------|------|------|------------|
| O1_1 <sup>1</sup> All | O1_1 | C1_1 |      | 134 (3)    | O1_2 <sup>1</sup> All | O1_2 | C1_2 |      | 136.3 (16) |
| O1_1 <sup>2</sup> All | O1_1 | C1_1 |      | -2 (5)     | O1_2 <sup>2</sup> All | O1_2 | C1_2 |      | 5 (3)      |
| F1                    | All  | O1_1 | C1_1 | -114 (4)   | F1                    | All  | O1_2 | C1_2 | -110 (2)   |
| All                   | O1_1 | C1_1 | C2_1 | 152 (3)    | All                   | O1_2 | C1_2 | C2_2 | -173 (2)   |
| All                   | O1_1 | C1_1 | C4_1 | 32 (4)     | All                   | O1_2 | C1_2 | C3_2 | -53 (3)    |
| All                   | O1_1 | C1_1 | C3_1 | -88 (4)    | All                   | O1_2 | C1_2 | C4_2 | 68 (3)     |
| O1_1                  | C1_1 | C2_1 | F1_1 | -77.6 (13) | O1_2                  | C1_2 | C3_2 | F5_2 | -41.2 (11) |
| C4_1                  | C1_1 | C2_1 | F1_1 | 42.2 (13)  | C2_2                  | C1_2 | C3_2 | F5_2 | 77.9 (9)   |
| C3_1                  | C1_1 | C2_1 | F1_1 | 164.7 (8)  | C4_2                  | C1_2 | C3_2 | F5_2 | -164.7 (7) |
| O1_1                  | C1_1 | C2_1 | F2_1 | 162.8 (12) | O1_2                  | C1_2 | C3_2 | F4_2 | 78.2 (8)   |
| C4_1                  | C1_1 | C2_1 | F2_1 | -77.5 (10) | C2_2                  | C1_2 | C3_2 | F4_2 | -162.6 (4) |
| C3_1                  | C1_1 | C2_1 | F2_1 | 45.0 (11)  | C4_2                  | C1_2 | C3_2 | F4_2 | -45.2 (8)  |
| O1_1                  | C1_1 | C2_1 | F3_1 | 45.2 (15)  | O1_2                  | C1_2 | C3_2 | F6_2 | -159.5 (9) |
| C4_1                  | C1_1 | C2_1 | F3_1 | 165.0 (11) | C2_2                  | C1_2 | C3_2 | F6_2 | -40.4 (8)  |
| C3_1                  | C1_1 | C2_1 | F3_1 | -72.5 (14) | C4_2                  | C1_2 | C3_2 | F6_2 | 77.0 (7)   |
| O1_1                  | C1_1 | C3_1 | F6_1 | 158.6 (12) | O1_2                  | C1_2 | C2_2 | F1_2 | 76.3 (9)   |
| C2_1                  | C1_1 | C3_1 | F6_1 | -83.9 (10) | C3_2                  | C1_2 | C2_2 | F1_2 | -45.5 (8)  |
| C4_1                  | C1_1 | C3_1 | F6_1 | 38.9 (13)  | C4_2                  | C1_2 | C2_2 | F1_2 | -163.0 (5) |
| O1_1                  | C1_1 | C3_1 | F4_1 | 43.4 (16)  | O1_2                  | C1_2 | C2_2 | F2_2 | -163.6 (9) |
| C2_1                  | C1_1 | C3_1 | F4_1 | 160.9 (13) | C3_2                  | C1_2 | C2_2 | F2_2 | 74.6 (6)   |
| C4_1                  | C1_1 | C3_1 | F4_1 | -76.3 (15) | C4_2                  | C1_2 | C2_2 | F2_2 | -43.0 (7)  |
| O1_1                  | C1_1 | C3_1 | F5_1 | -75.6 (13) | O1_2                  | C1_2 | C2_2 | F3_2 | -42.8 (11) |
| C2_1                  | C1_1 | C3_1 | F5_1 | 42.0 (12)  | C3_2                  | C1_2 | C2_2 | F3_2 | -164.6 (7) |
| C4_1                  | C1_1 | C3_1 | F5_1 | 164.8 (7)  | C4_2                  | C1_2 | C2_2 | F3_2 | 77.8 (8)   |
| O1_1                  | C1_1 | C4_1 | F7_1 | -78.0 (13) | O1_2                  | C1_2 | C4_2 | F7_2 | 73.9 (10)  |
| C2_1                  | C1_1 | C4_1 | F7_1 | 163.5 (7)  | C2_2                  | C1_2 | C4_2 | F7_2 | -44.5 (8)  |
| C3_1                  | C1_1 | C4_1 | F7_1 | 40.7 (13)  | C3_2                  | C1_2 | C4_2 | F7_2 | -162.2 (5) |
| O1_1                  | C1_1 | C4_1 | F8_1 | 162.7 (13) | O1_2                  | C1_2 | C4_2 | F9_2 | -163.6 (8) |
| C2_1                  | C1_1 | C4_1 | F8_1 | 44.1 (11)  | C2_2                  | C1_2 | C4_2 | F9_2 | 77.9 (6)   |
| C3_1                  | C1_1 | C4_1 | F8_1 | -78.7 (10) | C3_2                  | C1_2 | C4_2 | F9_2 | -39.7 (8)  |
| O1_1                  | C1_1 | C4_1 | F9_1 | 43.1 (15)  | O1_2                  | C1_2 | C4_2 | F8_2 | -44.4 (10) |
| C2_1                  | C1_1 | C4_1 | F9_1 | -75.4 (13) | C2_2                  | C1_2 | C4_2 | F8_2 | -162.8 (7) |
| C3_1                  | C1_1 | C4_1 | F9_1 | 161.8 (9)  | C3_2                  | C1_2 | C4_2 | F8_2 | 79.5 (8)   |

<sup>1</sup>1/2-Z,1-X,-1/2+Y; <sup>2</sup>1-Y,1/2+Z,1/2-X

**Table 7 Atomic Occupancy for pa-3\_a\_final.**

| Atom | Occupancy | Atom | Occupancy | Atom | Occupancy |
|------|-----------|------|-----------|------|-----------|
| O1_1 | 0.408 (3) | C1_1 | 0.408 (3) | C2_1 | 0.408 (3) |
| F1_1 | 0.408 (3) | F2_1 | 0.408 (3) | F3_1 | 0.408 (3) |
| C3_1 | 0.408 (3) | F4_1 | 0.408 (3) | F5_1 | 0.408 (3) |
| F6_1 | 0.408 (3) | C4_1 | 0.408 (3) | F7_1 | 0.408 (3) |
| F8_1 | 0.408 (3) | F9_1 | 0.408 (3) | O1_2 | 0.592 (3) |
| F4_2 | 0.592 (3) | C1_2 | 0.592 (3) | F5_2 | 0.592 (3) |
| F6_2 | 0.592 (3) | C3_2 | 0.592 (3) | F1_2 | 0.592 (3) |
| C2_2 | 0.592 (3) | F7_2 | 0.592 (3) | F8_2 | 0.592 (3) |
| F9_2 | 0.592 (3) | F3_2 | 0.592 (3) | F2_2 | 0.592 (3) |
| C4_2 | 0.592 (3) |      |           |      |           |

**Crystal structure of 3, the symmetry-generated atom sites are greyed out. Note that the nitrogen position cannot be crystallographically unambiguously assigned.**

Supplementary Figure 69 shows the crystal structure of **3**, Supplementary Data 4 gives full information on the crystallographic data.

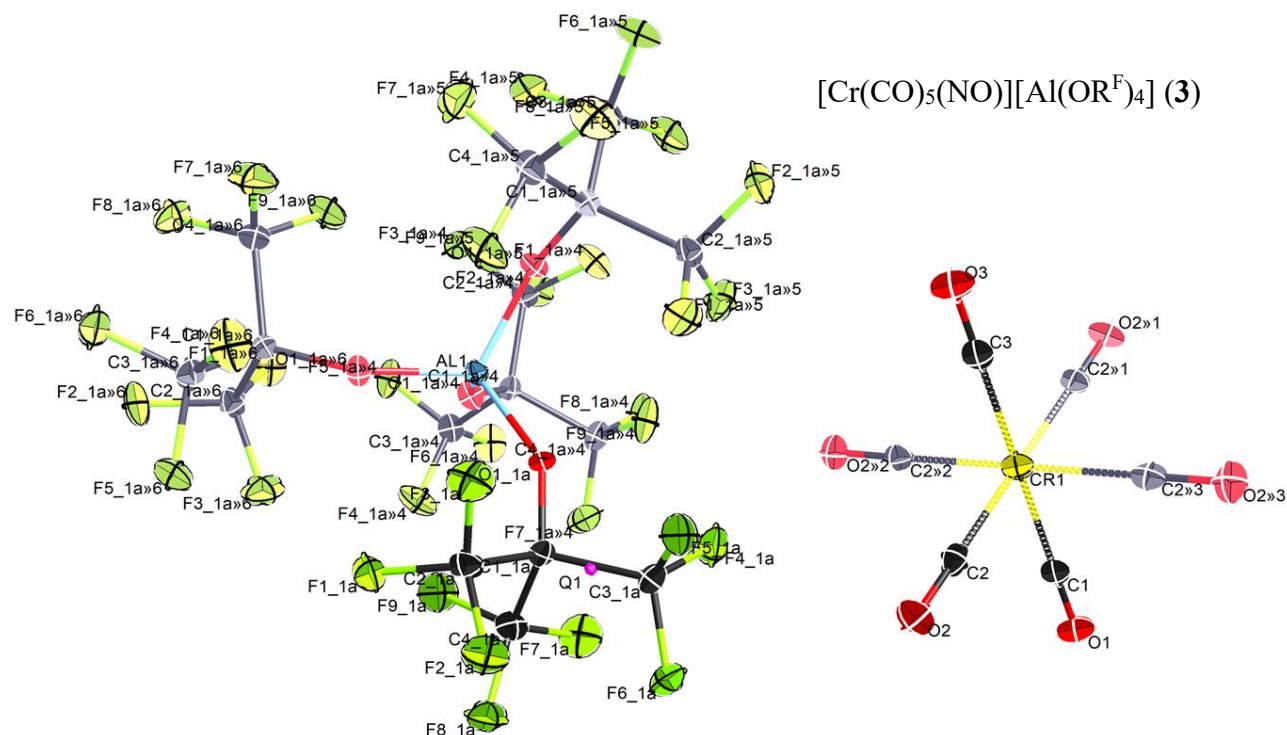

Supplementary Figure 69. Crystal structure of **3**.

**Crystal data and structure refinement for p4n\_a\_final.**

|                                               |                                                               |
|-----------------------------------------------|---------------------------------------------------------------|
| Identification code                           | p4n_a_final                                                   |
| Empirical formula                             | $\text{C}_{22}\text{AlCrF}_{36}\text{O}_{10}$                 |
| Formula weight                                | 1187.20                                                       |
| Temperature/K                                 | 100(2)                                                        |
| Crystal system                                | tetragonal                                                    |
| Space group                                   | $P4/n$                                                        |
| $a/\text{\AA}$                                | 13.6348(7)                                                    |
| $b/\text{\AA}$                                | 13.6348(7)                                                    |
| $c/\text{\AA}$                                | 9.5070(5)                                                     |
| $\alpha/^\circ$                               | 90                                                            |
| $\beta/^\circ$                                | 90                                                            |
| $\gamma/^\circ$                               | 90                                                            |
| Volume/ $\text{\AA}^3$                        | 1767.4(2)                                                     |
| $Z$                                           | 2                                                             |
| $\rho_{\text{calc}}/\text{cm}^3$              | 2.231                                                         |
| $\mu/\text{mm}^{-1}$                          | 0.593                                                         |
| $F(000)$                                      | 1146.0                                                        |
| Crystal size/ $\text{mm}^3$                   | $0.15 \times 0.1 \times 0.1$                                  |
| Radiation                                     | $\text{MoK}\alpha$ ( $\lambda = 0.71073$ )                    |
| $2\theta$ range for data collection/ $^\circ$ | 4.224 to 56.6                                                 |
| Index ranges                                  | $-16 \leq h \leq 18, -15 \leq k \leq 18, -12 \leq l \leq 12$  |
| Reflections collected                         | 11645                                                         |
| Independent reflections                       | 2202 [ $R_{\text{int}} = 0.0165, R_{\text{sigma}} = 0.0112$ ] |
| Data/restraints/parameters                    | 2202/189/164                                                  |
| Goodness-of-fit on $F^2$                      | 1.071                                                         |
| Final R indexes [ $I \geq 2\sigma(I)$ ]       | $R_1 = 0.0252, wR_2 = 0.0688$                                 |
| Final R indexes [all data]                    | $R_1 = 0.0267, wR_2 = 0.0698$                                 |
| Largest diff. peak/hole / $e \text{\AA}^{-3}$ | 0.45/-0.45                                                    |

Supplementary Data 4. Information on the crystallographic data of 3.

**Fractional Atomic Coordinates ( $\times 10^4$ ) and Equivalent Isotropic Displacement Parameters ( $\text{\AA}^2 \times 10^3$ ) for p4n\_a\_final.  $U_{eq}$  is defined as 1/3 of the trace of the orthogonalised  $U_{ij}$  tensor.**

| Atom | x           | y          | z           | $U_{eq}$   |
|------|-------------|------------|-------------|------------|
| O1_1 | 3333.0 (6)  | 6856.0 (6) | 1017.4 (9)  | 16.22 (18) |
| C1_1 | 4177.0 (8)  | 6885.8 (8) | 1757.3 (12) | 14.0 (2)   |
| C2_1 | 5059.8 (9)  | 7162.8 (9) | 799.5 (13)  | 18.8 (2)   |
| F1_1 | 5084.2 (6)  | 8126.0 (6) | 558.7 (9)   | 25.54 (19) |
| F2_1 | 5920.5 (6)  | 6912.1 (7) | 1373.6 (9)  | 27.12 (19) |
| F3_1 | 4995.8 (6)  | 6719.1 (7) | -443.4 (8)  | 27.86 (19) |
| C3_1 | 4357.2 (9)  | 5843.9 (9) | 2384.9 (13) | 18.6 (2)   |
| F4_1 | 3526.9 (6)  | 5471.0 (6) | 2902.3 (9)  | 27.48 (19) |
| F5_1 | 4680.9 (6)  | 5226.5 (6) | 1408.9 (9)  | 25.18 (19) |
| F6_1 | 5017.3 (6)  | 5851.2 (6) | 3432.2 (9)  | 26.17 (19) |
| C4_1 | 4111 (1)    | 7639.0 (9) | 2987.7 (14) | 20.1 (3)   |
| F7_1 | 3565.9 (7)  | 7288.5 (7) | 4027.9 (9)  | 31.0 (2)   |
| F8_1 | 4995.5 (6)  | 7863.9 (6) | 3527.8 (9)  | 27.33 (19) |
| F9_1 | 3703.6 (7)  | 8468.6 (6) | 2543.6 (9)  | 28.9 (2)   |
| C3   | 2500        | 2500       | 1670 (3)    | 20.0 (5)   |
| Cr1  | 2500        | 2500       | 3694.0 (4)  | 17.15 (10) |
| Al1  | 2500        | 7500       | 0           | 11.73 (14) |
| O1   | 2500        | 2500       | 6936 (2)    | 27.2 (4)   |
| C1   | 2500        | 2500       | 5754 (3)    | 18.9 (5)   |
| O2   | 4553.0 (7)  | 3455.3 (8) | 3691.5 (10) | 26.8 (2)   |
| C2   | 3805.8 (10) | 3104.9 (9) | 3697.0 (13) | 19.0 (2)   |
| O3   | 2500        | 2500       | 482 (2)     | 30.6 (5)   |

**Anisotropic Displacement Parameters ( $\text{\AA}^2 \times 10^3$ ) for p4n\_a\_final. The Anisotropic displacement factor exponent takes the form:  $-2\pi^2[h^2a^*U_{11}+2hka^*b^*U_{12}+\dots]$ .**

| Atom | $U_{11}$   | $U_{22}$   | $U_{33}$   | $U_{23}$ | $U_{13}$  | $U_{12}$ |
|------|------------|------------|------------|----------|-----------|----------|
| O1_1 | 12.8 (4)   | 15.3 (4)   | 20.6 (4)   | 1.8 (3)  | -3.7 (3)  | 0.4 (3)  |
| C1_1 | 12.9 (5)   | 13.9 (5)   | 15.3 (5)   | -0.8 (4) | -0.6 (4)  | 1.4 (4)  |
| C2_1 | 14.4 (5)   | 21.1 (6)   | 20.9 (6)   | 0.0 (5)  | -0.4 (4)  | -0.6 (4) |
| F1_1 | 22.4 (4)   | 21.8 (4)   | 32.5 (4)   | 6.6 (3)  | -1.7 (3)  | -6.6 (3) |
| F2_1 | 12.2 (3)   | 33.9 (5)   | 35.3 (5)   | 2.4 (4)  | -1.3 (3)  | 2.5 (3)  |
| F3_1 | 28.2 (4)   | 36.0 (5)   | 19.4 (4)   | -5.4 (3) | 6.0 (3)   | -2.2 (3) |
| C3_1 | 18.3 (6)   | 16.7 (5)   | 20.9 (6)   | 1.4 (4)  | -3.1 (4)  | 2.0 (4)  |
| F4_1 | 24.7 (4)   | 23.2 (4)   | 34.6 (4)   | 11.9 (3) | 1.4 (3)   | -2.3 (3) |
| F5_1 | 28.9 (4)   | 16.6 (4)   | 30.0 (4)   | -4.8 (3) | -4.2 (3)  | 7.4 (3)  |
| F6_1 | 28.3 (4)   | 24.4 (4)   | 25.7 (4)   | 3.5 (3)  | -11.9 (3) | 4.7 (3)  |
| C4_1 | 21.5 (6)   | 18.7 (6)   | 20.2 (6)   | -3.9 (5) | -2.0 (5)  | 3.2 (5)  |
| F7_1 | 34.7 (5)   | 36.5 (5)   | 21.9 (4)   | -4.3 (3) | 9.8 (3)   | 2.9 (4)  |
| F8_1 | 28.3 (4)   | 26.6 (4)   | 27.1 (4)   | -7.8 (3) | -9.9 (3)  | -0.6 (3) |
| F9_1 | 34.1 (5)   | 17.3 (4)   | 35.2 (4)   | -6.8 (3) | -5.8 (4)  | 9.6 (3)  |
| C3   | 17.9 (7)   | 17.9 (7)   | 24.1 (12)  | 0        | 0         | 0        |
| Cr1  | 17.36 (13) | 17.36 (13) | 16.74 (19) | 0        | 0         | 0        |
| Al1  | 10.70 (19) | 10.70 (19) | 13.8 (3)   | 0        | 0         | 0        |
| O1   | 31.2 (6)   | 31.2 (6)   | 19.2 (9)   | 0        | 0         | 0        |
| C1   | 17.2 (7)   | 17.2 (7)   | 22.3 (12)  | 0        | 0         | 0        |
| O2   | 21.8 (5)   | 29.4 (5)   | 29.0 (5)   | 1.8 (4)  | 0.7 (4)   | -3.0 (4) |
| C2   | 22.7 (6)   | 18.4 (6)   | 15.8 (5)   | 1.0 (4)  | 0.8 (4)   | 2.6 (5)  |
| O3   | 36.0 (7)   | 36.0 (7)   | 19.7 (9)   | 0        | 0         | 0        |

**Bond Lengths for p4n\_a\_final.**

| Atom Atom | Length/ $\text{\AA}$ | Atom Atom           | Length/ $\text{\AA}$ |
|-----------|----------------------|---------------------|----------------------|
| O1_1 C1_1 | 1.3493 (14)          | C4_1 F9_1           | 1.3290 (15)          |
| O1_1 Al1  | 1.7311 (8)           | C4_1 F8_1           | 1.3462 (15)          |
| C1_1 C2_1 | 1.5559 (16)          | C3 O3               | 1.130 (3)            |
| C1_1 C4_1 | 1.5591 (16)          | C3 Cr1              | 1.924 (3)            |
| C1_1 C3_1 | 1.5603 (16)          | Cr1 C1              | 1.958 (3)            |
| C2_1 F3_1 | 1.3304 (15)          | Cr1 C2              | 1.9621 (13)          |
| C2_1 F1_1 | 1.3335 (15)          | Cr1 C2 <sup>1</sup> | 1.9622 (13)          |
| C2_1 F2_1 | 1.3386 (14)          | Cr1 C2 <sup>2</sup> | 1.9622 (13)          |
| C3_1 F5_1 | 1.3283 (15)          | Cr1 C2 <sup>3</sup> | 1.9622 (13)          |
| C3_1 F4_1 | 1.3349 (15)          | O1 C1               | 1.124 (3)            |
| C3_1 F6_1 | 1.3422 (14)          | O2 C2               | 1.1253 (17)          |

C4\_1 F7\_1 1.3262 (16)  
<sup>1</sup>1/2-X,1/2-Y,+Z; <sup>2</sup>+Y,1/2-X,+Z; <sup>3</sup>1/2-Y,+X,+Z

**Bond Angles for p4n\_a\_final.**

| Atom Atom Atom | Angle/°     | Atom Atom Atom                          | Angle/°     |
|----------------|-------------|-----------------------------------------|-------------|
| C1_1 O1_1 All  | 146.67 (8)  | O3 C3 Cr1                               | 180.0       |
| O1_1 C1_1 C2_1 | 111.23 (10) | C3 Cr1 C1                               | 180.0       |
| O1_1 C1_1 C4_1 | 111.21 (10) | C3 Cr1 C2                               | 90.08 (4)   |
| C2_1 C1_1 C4_1 | 108.89 (10) | C1 Cr1 C2                               | 89.92 (4)   |
| O1_1 C1_1 C3_1 | 107.83 (9)  | C3 Cr1 C2 <sup>1</sup>                  | 90.08 (4)   |
| C2_1 C1_1 C3_1 | 108.84 (10) | C1 Cr1 C2 <sup>1</sup>                  | 89.92 (4)   |
| C4_1 C1_1 C3_1 | 108.78 (10) | C2 Cr1 C2 <sup>1</sup>                  | 179.83 (8)  |
| F3_1 C2_1 F1_1 | 107.27 (10) | C3 Cr1 C2 <sup>2</sup>                  | 90.08 (4)   |
| F3_1 C2_1 F2_1 | 107.67 (10) | C1 Cr1 C2 <sup>2</sup>                  | 89.92 (4)   |
| F1_1 C2_1 F2_1 | 107.44 (10) | C2 Cr1 C2 <sup>2</sup>                  | 90.0        |
| F3_1 C2_1 C1_1 | 111.01 (10) | C2 <sup>1</sup> Cr1 C2 <sup>2</sup>     | 90.0        |
| F1_1 C2_1 C1_1 | 111.03 (10) | C3 Cr1 C2 <sup>3</sup>                  | 90.08 (4)   |
| F2_1 C2_1 C1_1 | 112.19 (10) | C1 Cr1 C2 <sup>3</sup>                  | 89.92 (4)   |
| F5_1 C3_1 F4_1 | 107.33 (10) | C2 Cr1 C2 <sup>3</sup>                  | 90.0        |
| F5_1 C3_1 F6_1 | 107.46 (10) | C2 <sup>1</sup> Cr1 C2 <sup>3</sup>     | 90.0        |
| F4_1 C3_1 F6_1 | 107.35 (10) | C2 <sup>2</sup> Cr1 C2 <sup>3</sup>     | 179.83 (7)  |
| F5_1 C3_1 C1_1 | 111.23 (10) | O1_1 <sup>4</sup> All O1_1 <sup>5</sup> | 112.06 (6)  |
| F4_1 C3_1 C1_1 | 110.74 (10) | O1_1 <sup>4</sup> All O1_1 <sup>6</sup> | 108.19 (3)  |
| F6_1 C3_1 C1_1 | 112.49 (10) | O1_1 <sup>5</sup> All O1_1 <sup>6</sup> | 108.19 (3)  |
| F7_1 C4_1 F9_1 | 108.02 (11) | O1_1 <sup>4</sup> All O1_1              | 108.19 (3)  |
| F7_1 C4_1 F8_1 | 107.44 (10) | O1_1 <sup>5</sup> All O1_1              | 108.19 (3)  |
| F9_1 C4_1 F8_1 | 107.56 (11) | O1_1 <sup>6</sup> All O1_1              | 112.06 (6)  |
| F7_1 C4_1 C1_1 | 110.76 (10) | O1 C1 Cr1                               | 180.0       |
| F9_1 C4_1 C1_1 | 110.27 (10) | O2 C2 Cr1                               | 179.56 (12) |
| F8_1 C4_1 C1_1 | 112.62 (10) |                                         |             |

<sup>1</sup>1/2-X,1/2-Y,+Z; <sup>2</sup>+Y,1/2-X,+Z; <sup>3</sup>1/2-Y,+X,+Z; <sup>4</sup>-1/2+Y,1-X,-Z; <sup>5</sup>1-Y,1/2+X,-Z; <sup>6</sup>1/2-X,3/2-Y,+Z

**Torsion Angles for p4n\_a\_final.**

| A B C D             | Angle/°      | A B C D                         | Angle/°      |
|---------------------|--------------|---------------------------------|--------------|
| All O1_1 C1_1 C2_1  | -61.41 (18)  | C4_1 C1_1 C3_1 F4_1             | 77.71 (12)   |
| All O1_1 C1_1 C4_1  | 60.14 (18)   | O1_1 C1_1 C3_1 F6_1             | -163.12 (10) |
| All O1_1 C1_1 C3_1  | 179.32 (11)  | C2_1 C1_1 C3_1 F6_1             | 76.10 (12)   |
| O1_1 C1_1 C2_1 F3_1 | -40.41 (13)  | C4_1 C1_1 C3_1 F6_1             | -42.41 (13)  |
| C4_1 C1_1 C2_1 F3_1 | -163.30 (10) | O1_1 C1_1 C4_1 F7_1             | 74.82 (13)   |
| C3_1 C1_1 C2_1 F3_1 | 78.26 (12)   | C2_1 C1_1 C4_1 F7_1             | -162.27 (10) |
| O1_1 C1_1 C2_1 F1_1 | 78.83 (12)   | C3_1 C1_1 C4_1 F7_1             | -43.79 (13)  |
| C4_1 C1_1 C2_1 F1_1 | -44.06 (13)  | O1_1 C1_1 C4_1 F9_1             | -44.69 (14)  |
| C3_1 C1_1 C2_1 F1_1 | -162.50 (10) | C2_1 C1_1 C4_1 F9_1             | 78.22 (13)   |
| O1_1 C1_1 C2_1 F2_1 | -160.93 (10) | C3_1 C1_1 C4_1 F9_1             | -163.30 (10) |
| C4_1 C1_1 C2_1 F2_1 | 76.17 (13)   | O1_1 C1_1 C4_1 F8_1             | -164.84 (10) |
| C3_1 C1_1 C2_1 F2_1 | -42.27 (13)  | C2_1 C1_1 C4_1 F8_1             | -41.94 (14)  |
| O1_1 C1_1 C3_1 F5_1 | 76.26 (12)   | C3_1 C1_1 C4_1 F8_1             | 76.54 (13)   |
| C2_1 C1_1 C3_1 F5_1 | -44.52 (13)  | C1_1 O1_1 All O1_1 <sup>1</sup> | 157.66 (16)  |
| C4_1 C1_1 C3_1 F5_1 | -163.03 (10) | C1_1 O1_1 All O1_1 <sup>2</sup> | 36.06 (13)   |
| O1_1 C1_1 C3_1 F4_1 | -43.00 (13)  | C1_1 O1_1 All O1_1 <sup>3</sup> | -83.14 (14)  |
| C2_1 C1_1 C3_1 F4_1 | -163.78 (10) |                                 |              |

<sup>1</sup>-1/2+Y,1-X,-Z; <sup>2</sup>1-Y,1/2+X,-Z; <sup>3</sup>1/2-X,3/2-Y,+Z

## Modelling of the NO-disorder for $[\text{Cr}(\text{CO})_5(\text{NO})][\text{Al}(\text{OR}^{\text{F}})_4]$

A roughly equal distribution in the NO disorder (16%/4x17%/16%) led to the best model (Supplementary Figure 70). The  $R_1$  value changed from 2.52% to 2.46% when the disorder was included. A refinement of the N positions with a free variable, however, did not lead to a stable model. Supplementary Data 5 gives full information on crystallographic data.

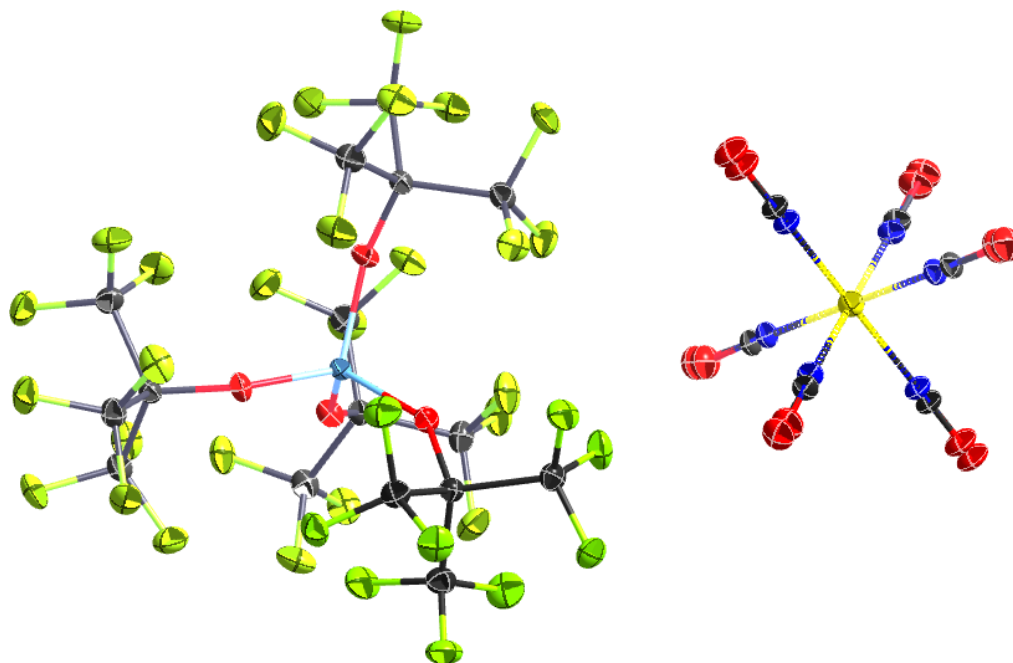

Supplementary Figure 70. Disorder model for 3.

The resulting bond lengths are shown in Supplementary Table 8.

Supplementary Table 8. Resulting bond lengths of the disorder model for 3.

| w/o disorder [pm] |          | With NO disorder [pm] |            |          |           |
|-------------------|----------|-----------------------|------------|----------|-----------|
| d(Cr-C1)          | 195.8(3) | d(Cr-C1)              | 199.6(3)   | d(Cr-N1) | 171(4)    |
| d(Cr-C2)          | 196.2(1) | d(Cr-C2)              | 200.78(16) | d(Cr-N2) | 170.2(16) |
| d(Cr-C3)          | 192.4(4) | d(Cr-C3)              | 196.5(5)   | d(Cr-N3) | 166(4)    |

We are aware that a disordered NO ligand describes the ‘chemical reality’ more accurately than an ‘only CO’ refinement for the  $[\text{Cr}(\text{CO})_5(\text{NO})]^+$  system. However, based on the crystal data alone, to us it seemed not ‘scientifically correct’ to add and refine a ligand that is not differentiable by XRD means. The low bond precisions for the Cr-N bonds underlines the question, if the refinement of a disordered NO actually yields a scientifically more accurate structure model.

The disordered crystal structure was also deployed in the CCDC (Accession number: 1886541)

**Crystal data and structure refinement for p4n\_a\_NO\_disorder.**

|                                             |                                                               |
|---------------------------------------------|---------------------------------------------------------------|
| Identification code                         | p4n_a_NO_disorder                                             |
| Empirical formula                           | C <sub>21</sub> O <sub>10</sub> F <sub>36</sub> AlCrN         |
| Formula weight                              | 1189.15                                                       |
| Temperature/K                               | 100.0                                                         |
| Crystal system                              | tetragonal                                                    |
| Space group                                 | P4/n                                                          |
| a/Å                                         | 13.6348(7)                                                    |
| b/Å                                         | 13.6348(7)                                                    |
| c/Å                                         | 9.5070(5)                                                     |
| α/°                                         | 90                                                            |
| β/°                                         | 90                                                            |
| γ/°                                         | 90                                                            |
| Volume/Å <sup>3</sup>                       | 1767.43(16)                                                   |
| Z                                           | 2                                                             |
| ρ <sub>calc</sub> /cm <sup>3</sup>          | 2.2343                                                        |
| μ/mm <sup>-1</sup>                          | 0.594                                                         |
| F(000)                                      | 1150.3                                                        |
| Crystal size/mm <sup>3</sup>                | 0.15 × 0.1 × 0.1                                              |
| Radiation                                   | Mo Kα (λ = 0.71073)                                           |
| 2θ range for data collection/°              | 4.22 to 56.6                                                  |
| Index ranges                                | -16 ≤ h ≤ 18, -15 ≤ k ≤ 18, -12 ≤ l ≤ 12                      |
| Reflections collected                       | 11645                                                         |
| Independent reflections                     | 2202 [R <sub>int</sub> = 0.0165, R <sub>sigma</sub> = 0.0112] |
| Data/restraints/parameters                  | 2202/0/172                                                    |
| Goodness-of-fit on F <sup>2</sup>           | 1.078                                                         |
| Final R indexes [I ≥ 2σ (I)]                | R <sub>1</sub> = 0.0246, wR <sub>2</sub> = 0.0659             |
| Final R indexes [all data]                  | R <sub>1</sub> = 0.0261, wR <sub>2</sub> = 0.0669             |
| Largest diff. peak/hole / e Å <sup>-3</sup> | 0.48/-0.41                                                    |

*Supplementary Data 5.* Information on the crystallographic data of disordered **3**.

**Fractional Atomic Coordinates (×10<sup>4</sup>) and Equivalent Isotropic Displacement Parameters (Å<sup>2</sup>×10<sup>3</sup>) for p4n\_a\_NO\_disorder. U<sub>eq</sub> is defined as 1/3 of the trace of the orthogonalised U<sub>ij</sub> tensor.**

| Atom | x           | y          | z           | U(eq)      |
|------|-------------|------------|-------------|------------|
| N3   | 2500        | 2500       | 1950 (40)   | 16.5 (11)  |
| O6   | 2500        | 2500       | 730 (50)    | 27.4 (12)  |
| N2   | 3623 (11)   | 3044 (14)  | 3690 (20)   | 15.3 (6)   |
| O5   | 4450 (30)   | 3360 (20)  | 3700 (40)   | 24.6 (7)   |
| N1   | 2500        | 2500       | 5490 (40)   | 15.7 (12)  |
| O4   | 2500        | 2500       | 6650 (40)   | 23.3 (10)  |
| C1   | 2500        | 2500       | 5794 (4)    | 15.7 (12)  |
| O1   | 2500        | 2500       | 6975 (3)    | 23.3 (10)  |
| C2   | 3837.7 (13) | 3116 (3)   | 3698 (4)    | 15.3 (6)   |
| O2   | 4570 (5)    | 3471 (4)   | 3690 (8)    | 24.6 (7)   |
| C3   | 2500        | 2500       | 1627 (3)    | 16.5 (11)  |
| O3   | 2500        | 2500       | 445 (4)     | 27.4 (12)  |
| Cr1  | 2500        | 2500       | 3694.0 (4)  | 17.02 (10) |
| Al1  | 2500        | 7500       | 0           | 11.62 (13) |
| O1_1 | 3333.0 (6)  | 6856.0 (6) | 1017.7 (9)  | 16.11 (17) |
| C1_1 | 4177.0 (8)  | 6885.7 (8) | 1757.2 (12) | 13.9 (2)   |
| C2_1 | 5059.7 (9)  | 7162.8 (9) | 799.7 (13)  | 18.7 (2)   |
| F1_1 | 5084.3 (6)  | 8125.9 (6) | 558.9 (9)   | 25.44 (18) |
| F2_1 | 5920.4 (5)  | 6912.0 (6) | 1373.3 (9)  | 26.99 (19) |
| F3_1 | 4995.4 (6)  | 6719.4 (6) | -443.7 (8)  | 27.74 (18) |
| C3_1 | 4357.3 (9)  | 5844.1 (9) | 2385.3 (13) | 18.6 (2)   |
| F4_1 | 3527.0 (6)  | 5471.1 (6) | 2902.4 (9)  | 27.37 (19) |
| F5_1 | 4680.7 (6)  | 5226.6 (6) | 1408.8 (8)  | 25.10 (18) |
| F6_1 | 5017.2 (6)  | 5851.0 (6) | 3432.1 (8)  | 26.11 (18) |
| C4_1 | 4111.1 (9)  | 7638.6 (9) | 2987.9 (13) | 20.1 (2)   |
| F7_1 | 3566.3 (6)  | 7288.6 (7) | 4027.9 (8)  | 30.88 (19) |

|      |            |            |            |            |
|------|------------|------------|------------|------------|
| F8_1 | 4995.4 (6) | 7863.7 (6) | 3527.5 (8) | 27.23 (18) |
| F9_1 | 3703.5 (6) | 8468.5 (6) | 2543.7 (9) | 28.78 (19) |

**Anisotropic Displacement Parameters ( $\text{\AA}^2 \times 10^3$ ) for p4n\_a\_NO\_disorder.** The Anisotropic displacement factor exponent takes the form:  $-2\pi^2[h^2a^2U_{11}+2hka*b*U_{12}+...]$ .

| Atom | U <sub>11</sub> | U <sub>22</sub> | U <sub>33</sub> | U <sub>12</sub> | U <sub>13</sub> | U <sub>23</sub> |
|------|-----------------|-----------------|-----------------|-----------------|-----------------|-----------------|
| N3   | 19.4 (7)        | 19.4 (7)        | 11 (4)          | -0              | -0              | 0               |
| O6   | 35.2 (7)        | 35.2 (7)        | 12 (3)          | -0              | -0              | 0               |
| N2   | 10.8 (16)       | 18.0 (8)        | 17.2 (5)        | -2.0 (11)       | 0.4 (11)        | 0.8 (5)         |
| O5   | 19 (2)          | 26.0 (16)       | 28.4 (5)        | -5.4 (9)        | 1.0 (11)        | 1.9 (10)        |
| N1   | 18.9 (7)        | 18.9 (7)        | 9 (4)           | -0              | -0              | 0               |
| O4   | 30.4 (7)        | 30.4 (7)        | 9 (2)           | -0              | -0              | 0               |
| C1   | 18.9 (7)        | 18.9 (7)        | 9 (4)           | -0              | -0              | 0               |
| O1   | 30.4 (7)        | 30.4 (7)        | 9 (2)           | -0              | -0              | 0               |
| C2   | 10.8 (16)       | 18.0 (8)        | 17.2 (5)        | -2.0 (11)       | 0.4 (11)        | 0.8 (5)         |
| O2   | 19 (2)          | 26.0 (16)       | 28.4 (5)        | -5.4 (9)        | 1.0 (11)        | 1.9 (10)        |
| C3   | 19.4 (7)        | 19.4 (7)        | 11 (4)          | -0              | -0              | 0               |
| O3   | 35.2 (7)        | 35.2 (7)        | 12 (3)          | -0              | -0              | 0               |
| Cr1  | 17.18 (13)      | 17.18 (13)      | 16.71 (19)      | -0              | -0              | 0               |
| All  | 10.60 (18)      | 10.60 (18)      | 13.7 (3)        | -0              | -0              | 0               |
| O1_1 | 12.6 (4)        | 15.2 (4)        | 20.5 (4)        | 0.5 (3)         | -3.6 (3)        | 1.8 (3)         |
| C1_1 | 12.8 (5)        | 13.8 (5)        | 15.2 (5)        | 1.3 (4)         | -0.5 (4)        | -0.8 (4)        |
| C2_1 | 14.2 (5)        | 21.0 (5)        | 20.8 (5)        | -0.5 (4)        | -0.3 (4)        | -0.1 (4)        |
| F1_1 | 22.2 (4)        | 21.7 (4)        | 32.4 (4)        | -6.6 (3)        | -1.6 (3)        | 6.6 (3)         |
| F2_1 | 12.1 (3)        | 33.8 (4)        | 35.0 (4)        | 2.5 (3)         | -1.4 (3)        | 2.4 (3)         |
| F3_1 | 28.1 (4)        | 35.9 (4)        | 19.2 (4)        | -2.1 (3)        | 6.0 (3)         | -5.4 (3)        |
| C3_1 | 18.1 (5)        | 16.7 (5)        | 20.9 (5)        | 2.1 (4)         | -3.1 (4)        | 1.3 (4)         |
| F4_1 | 24.5 (4)        | 23.0 (4)        | 34.5 (4)        | -2.3 (3)        | 1.5 (3)         | 12.0 (3)        |
| F5_1 | 28.9 (4)        | 16.6 (3)        | 29.9 (4)        | 7.5 (3)         | -4.2 (3)        | -4.8 (3)        |
| F6_1 | 28.3 (4)        | 24.4 (4)        | 25.6 (4)        | 4.6 (3)         | -12.0 (3)       | 3.5 (3)         |
| C4_1 | 21.5 (6)        | 18.7 (5)        | 20.1 (5)        | 3.3 (4)         | -1.9 (4)        | -3.9 (4)        |
| F7_1 | 34.6 (5)        | 36.2 (5)        | 21.9 (4)        | 2.8 (4)         | 9.7 (3)         | -4.3 (3)        |
| F8_1 | 28.2 (4)        | 26.4 (4)        | 27.1 (4)        | -0.6 (3)        | -9.9 (3)        | -7.7 (3)        |
| F9_1 | 34.0 (4)        | 17.3 (4)        | 35.1 (4)        | 9.6 (3)         | -5.8 (4)        | -6.8 (3)        |

**Bond Lengths for p4n\_a\_NO\_disorder.**

| Atom | Atom              | Length/ $\text{\AA}$ | Atom | Atom | Length/ $\text{\AA}$ |
|------|-------------------|----------------------|------|------|----------------------|
| N3   | O6                | 1.15 (4)             | All  | O1_1 | 1.7312 (8)           |
| N3   | Cr1               | 1.66 (4)             | O1_1 | C1_1 | 1.3491 (13)          |
| N2   | O5                | 1.21 (3)             | C1_1 | C2_1 | 1.5556 (16)          |
| N2   | Cr1 <sup>1</sup>  | 1.702 (16)           | C1_1 | C3_1 | 1.5601 (16)          |
| N1   | O4                | 1.10 (3)             | C1_1 | C4_1 | 1.5591 (16)          |
| N1   | Cr1               | 1.71 (4)             | C2_1 | F1_1 | 1.3334 (14)          |
| C1   | O1                | 1.124 (5)            | C2_1 | F2_1 | 1.3384 (14)          |
| C1   | Cr1               | 1.996 (3)            | C2_1 | F3_1 | 1.3306 (14)          |
| C2   | O2                | 1.111 (5)            | C3_1 | F4_1 | 1.3348 (14)          |
| C2   | Cr1 <sup>1</sup>  | 2.0078 (16)          | C3_1 | F5_1 | 1.3287 (14)          |
| C3   | O3                | 1.124 (5)            | C3_1 | F6_1 | 1.3417 (14)          |
| C3   | Cr1               | 1.965 (3)            | C4_1 | F7_1 | 1.3256 (15)          |
| All  | O1_1 <sup>2</sup> | 1.7312 (8)           | C4_1 | F8_1 | 1.3458 (15)          |
| All  | O1_1 <sup>3</sup> | 1.7312 (8)           | C4_1 | F9_1 | 1.3296 (14)          |
| All  | O1_1 <sup>4</sup> | 1.7312 (8)           |      |      |                      |

<sup>1</sup>1/2-X,1/2-Y,+Z; <sup>2</sup>1/2-X,3/2-Y,+Z; <sup>3</sup>-1/2+Y,1-X,-Z; <sup>4</sup>1-Y,1/2+X,-Z

**Bond Angles for p4n\_a\_NO\_disorder.**

| Atom            | Atom | Atom            | Angle/ $^\circ$ | Atom              | Atom | Atom              | Angle/ $^\circ$ |
|-----------------|------|-----------------|-----------------|-------------------|------|-------------------|-----------------|
| N2 <sup>1</sup> | Cr1  | N3              | 89.8 (6)        | O1_1              | All  | O1_1 <sup>4</sup> | 112.04 (6)      |
| N2              | Cr1  | N3              | 89.8 (6)        | O1_1 <sup>5</sup> | All  | O1_1 <sup>6</sup> | 112.04 (6)      |
| N2 <sup>2</sup> | Cr1  | N3              | 89.8 (6)        | O1_1 <sup>6</sup> | All  | O1_1 <sup>4</sup> | 108.20 (3)      |
| N2 <sup>3</sup> | Cr1  | N3              | 89.8 (6)        | O1_1 <sup>5</sup> | All  | O1_1              | 108.20 (3)      |
| N2 <sup>3</sup> | Cr1  | N2              | 90.00 (12)      | O1_1 <sup>6</sup> | All  | O1_1              | 108.20 (3)      |
| N2 <sup>2</sup> | Cr1  | N2              | 90.00 (12)      | O1_1 <sup>5</sup> | All  | O1_1 <sup>4</sup> | 108.20 (3)      |
| N2 <sup>3</sup> | Cr1  | N2 <sup>1</sup> | 90.00 (12)      | C2_1              | C1_1 | O1_1              | 111.24 (9)      |
| N2 <sup>3</sup> | Cr1  | N2 <sup>2</sup> | 179.6 (13)      | C3_1              | C1_1 | O1_1              | 107.85 (9)      |
| N2 <sup>2</sup> | Cr1  | N2 <sup>1</sup> | 90.00 (12)      | C3_1              | C1_1 | C2_1              | 108.85 (9)      |
| N2              | Cr1  | N2 <sup>1</sup> | 179.6 (13)      | C4_1              | C1_1 | O1_1              | 111.21 (9)      |
| N1              | Cr1  | N3              | 180.0           | C4_1              | C1_1 | C2_1              | 108.89 (9)      |
| N1              | Cr1  | N2 <sup>2</sup> | 90.2 (6)        | C4_1              | C1_1 | C3_1              | 108.73 (9)      |

|                 |     |                 |            |      |      |      |             |
|-----------------|-----|-----------------|------------|------|------|------|-------------|
| N1              | Cr1 | N2 <sup>1</sup> | 90.2 (6)   | F1_1 | C2_1 | C1_1 | 111.04 (10) |
| N1              | Cr1 | N2              | 90.2 (6)   | F2_1 | C2_1 | C1_1 | 112.21 (10) |
| N1              | Cr1 | N2 <sup>3</sup> | 90.2 (6)   | F2_1 | C2_1 | F1_1 | 107.43 (10) |
| C2 <sup>1</sup> | Cr1 | C1              | 89.88 (11) | F3_1 | C2_1 | C1_1 | 111.01 (10) |
| C2              | Cr1 | C1              | 89.88 (11) | F3_1 | C2_1 | F1_1 | 107.25 (10) |
| C2 <sup>2</sup> | Cr1 | C1              | 89.88 (11) | F3_1 | C2_1 | F2_1 | 107.68 (10) |
| C2 <sup>3</sup> | Cr1 | C1              | 89.88 (11) | F4_1 | C3_1 | C1_1 | 110.74 (10) |
| C2 <sup>3</sup> | Cr1 | C2              | 90.00 (4)  | F5_1 | C3_1 | C1_1 | 111.21 (9)  |
| C2 <sup>2</sup> | Cr1 | C2              | 90.00 (4)  | F5_1 | C3_1 | F4_1 | 107.30 (10) |
| C2 <sup>3</sup> | Cr1 | C2 <sup>1</sup> | 90.00 (4)  | F6_1 | C3_1 | C1_1 | 112.54 (10) |
| C2 <sup>3</sup> | Cr1 | C2 <sup>2</sup> | 179.8 (2)  | F6_1 | C3_1 | F4_1 | 107.35 (10) |
| C2 <sup>2</sup> | Cr1 | C2 <sup>1</sup> | 90.00 (4)  | F6_1 | C3_1 | F5_1 | 107.46 (10) |
| C2              | Cr1 | C2 <sup>1</sup> | 179.8 (2)  | F7_1 | C4_1 | C1_1 | 110.80 (10) |
| C3              | Cr1 | C1              | 180.0      | F8_1 | C4_1 | C1_1 | 112.62 (10) |
| C3              | Cr1 | C2 <sup>2</sup> | 90.12 (11) | F8_1 | C4_1 | F7_1 | 107.45 (10) |
| C3              | Cr1 | C2 <sup>1</sup> | 90.12 (11) | F9_1 | C4_1 | C1_1 | 110.25 (10) |
| C3              | Cr1 | C2              | 90.12 (11) | F9_1 | C4_1 | F7_1 | 108.00 (10) |
| C3              | Cr1 | C2 <sup>3</sup> | 90.12 (11) | F9_1 | C4_1 | F8_1 | 107.54 (10) |

<sup>1</sup>1/2-X,1/2-Y,+Z; <sup>2</sup>1/2-Y,+X,+Z; <sup>3</sup>+Y,1/2-X,+Z; <sup>4</sup>1/2-X,3/2-Y,+Z; <sup>5</sup>1-Y,1/2+X,-Z; <sup>6</sup>-1/2+Y,1-X,-Z

**Atomic Occupancy for p4n\_a\_NO\_disorder.**

| Atom | Occupancy | Atom | Occupancy | Atom | Occupancy |
|------|-----------|------|-----------|------|-----------|
| N3   | 0.160000  | O6   | 0.160000  | N2   | 0.170000  |
| O5   | 0.170000  | N1   | 0.160000  | O4   | 0.160000  |
| C1   | 0.840000  | O1   | 0.840000  | C2   | 0.830000  |
| O2   | 0.830000  | C3   | 0.840000  | O3   | 0.840000  |



**Crystal structure of 4, the symmetry-generated atom sites are greyed out. Note that the nitrogen position cannot be crystallographically unambiguously assigned.**

Supplementary Figure 71 shows the crystal structure of **4**, Supplementary Data 6 gives full information in crystallographic data.

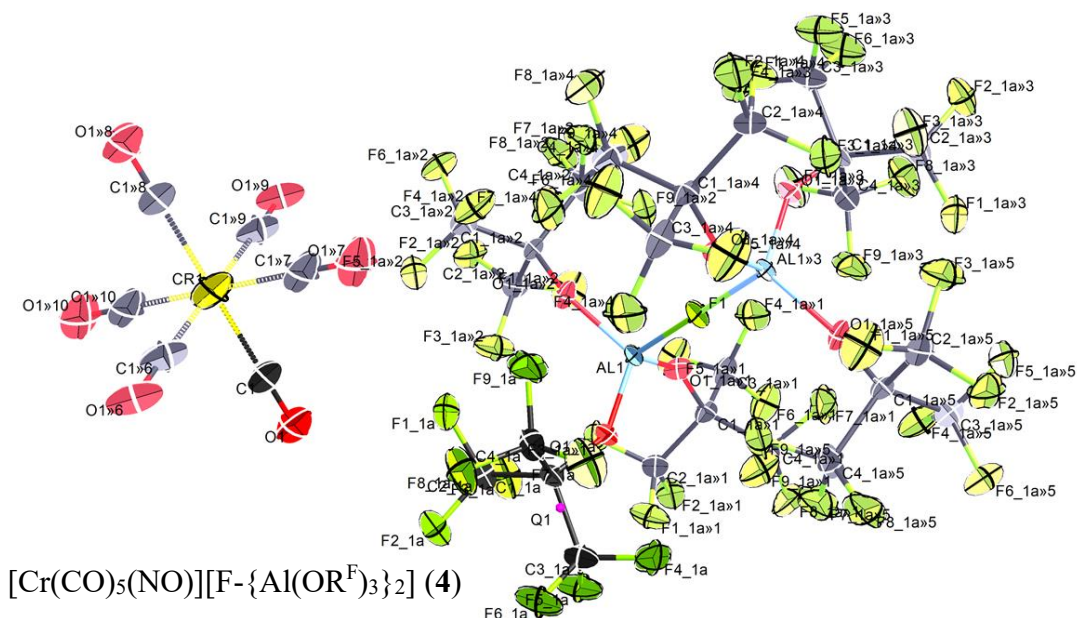

Supplementary Figure 71. Crystal structure of **4**.

**Crystal data and structure refinement for pa-3\_a\_final.**

|                                             |                                                                   |
|---------------------------------------------|-------------------------------------------------------------------|
| Identification code                         | pa-3_a_final                                                      |
| Empirical formula                           | C <sub>30</sub> Al <sub>2</sub> CrF <sub>55</sub> O <sub>12</sub> |
| Formula weight                              | 1703.26                                                           |
| Temperature/K                               | 100(2)                                                            |
| Crystal system                              | cubic                                                             |
| Space group                                 | Pa-3                                                              |
| a/Å                                         | 17.2474(3)                                                        |
| b/Å                                         | 17.2474(3)                                                        |
| c/Å                                         | 17.2474(3)                                                        |
| α/°                                         | 90                                                                |
| β/°                                         | 90                                                                |
| γ/°                                         | 90                                                                |
| Volume/Å <sup>3</sup>                       | 5130.6(3)                                                         |
| Z                                           | 4                                                                 |
| ρ <sub>calc</sub> /cm <sup>3</sup>          | 2.205                                                             |
| μ/mm <sup>-1</sup>                          | 0.515                                                             |
| F(000)                                      | 3284.0                                                            |
| Crystal size/mm <sup>3</sup>                | 0.4 × 0.3 × 0.2                                                   |
| Radiation                                   | MoKα (λ = 0.71073)                                                |
| 2θ range for data collection/°              | 4.09 to 57.328                                                    |
| Index ranges                                | -23 ≤ h ≤ 12, -15 ≤ k ≤ 23, -19 ≤ l ≤ 22                          |
| Reflections collected                       | 13204                                                             |
| Independent reflections                     | 2197 [R <sub>int</sub> = 0.0216, R <sub>sigma</sub> = 0.0152]     |
| Data/restraints/parameters                  | 2197/614/250                                                      |
| Goodness-of-fit on F <sup>2</sup>           | 1.272                                                             |
| Final R indexes [I >= 2σ (I)]               | R <sub>1</sub> = 0.0603, wR <sub>2</sub> = 0.1043                 |
| Final R indexes [all data]                  | R <sub>1</sub> = 0.0642, wR <sub>2</sub> = 0.1056                 |
| Largest diff. peak/hole / e Å <sup>-3</sup> | 0.30/-0.35                                                        |

Supplementary Data 6. Information on the crystallographic data of 4.

**Fractional Atomic Coordinates ( $\times 10^4$ ) and Equivalent Isotropic Displacement Parameters ( $\text{\AA}^2 \times 10^3$ ) for pa-3\_a\_final.  $U_{eq}$  is defined as 1/3 of the trace of the orthogonalised  $U_{ij}$  tensor.**

| Atom | x           | y           | z           | $U_{eq}$  |
|------|-------------|-------------|-------------|-----------|
| F1   | 10000       | 0           | 5000        | 21.6 (7)  |
| All  | 9410.8 (4)  | 589.2 (4)   | 5589.2 (4)  | 14.3 (2)  |
| O1_2 | 9093 (19)   | 1282 (18)   | 4973 (18)   | 23.8 (13) |
| C1_2 | 8492 (14)   | 1621 (10)   | 4596 (11)   | 20.8 (8)  |
| C2_2 | 8117 (4)    | 2256 (4)    | 5114 (4)    | 29.2 (14) |
| F1_2 | 8000 (20)   | 2011 (19)   | 5836 (9)    | 41.6 (16) |
| F2_2 | 7449 (10)   | 2480 (11)   | 4812 (13)   | 43 (4)    |
| F3_2 | 8577 (3)    | 2886 (3)    | 5146 (4)    | 38.9 (13) |
| C3_2 | 8801 (4)    | 1998 (4)    | 3840 (4)    | 30.5 (14) |
| F4_2 | 9465 (7)    | 2378 (13)   | 3968 (14)   | 43.3 (15) |
| F5_2 | 8307 (4)    | 2514 (4)    | 3546 (4)    | 45.9 (17) |
| F6_2 | 8929 (8)    | 1467 (6)    | 3299 (7)    | 44 (2)    |
| C4_2 | 7863 (3)    | 1008 (4)    | 4380 (3)    | 26.4 (13) |
| F7_2 | 8191 (17)   | 356 (8)     | 4136 (16)   | 41.4 (13) |
| F8_2 | 7380 (4)    | 1262 (4)    | 3827 (4)    | 33.4 (14) |
| F9_2 | 7424 (3)    | 832 (3)     | 4994 (3)    | 34.1 (11) |
| O1_1 | 9132 (15)   | 1341 (14)   | 5009 (14)   | 23.8 (13) |
| C1_1 | 8559 (11)   | 1703 (8)    | 4608 (8)    | 20.8 (8)  |
| C2_1 | 7853 (3)    | 1864 (3)    | 5138 (3)    | 30.0 (11) |
| F1_1 | 7430 (2)    | 1221 (3)    | 5229 (3)    | 41.5 (10) |
| F2_1 | 7377 (8)    | 2406 (10)   | 4876 (10)   | 35 (2)    |
| F3_1 | 8106 (15)   | 2078 (15)   | 5832 (7)    | 41.6 (16) |
| C3_1 | 8894 (3)    | 2484 (3)    | 4312 (3)    | 32.1 (12) |
| F4_1 | 9607 (5)    | 2373 (10)   | 4049 (11)   | 43.3 (15) |
| F5_1 | 8936 (3)    | 3001 (2)    | 4879 (3)    | 42.7 (11) |
| F6_1 | 8460 (4)    | 2786 (3)    | 3754 (3)    | 45.8 (13) |
| C4_1 | 8310 (3)    | 1204 (3)    | 3907 (3)    | 32.5 (12) |
| F7_1 | 8825 (7)    | 1222 (5)    | 3342 (6)    | 46.0 (19) |
| F8_1 | 7630 (3)    | 1430 (4)    | 3620 (3)    | 43.4 (13) |
| F9_1 | 8232 (13)   | 466 (6)     | 4133 (12)   | 41.4 (13) |
| O1   | 5816.3 (17) | 1504.5 (17) | 5497.5 (19) | 63.1 (8)  |
| C1   | 5513 (2)    | 954 (2)     | 5323 (2)    | 50.3 (9)  |
| Cr1  | 5000        | 0           | 5000        | 48.8 (4)  |

**Anisotropic Displacement Parameters ( $\text{\AA}^2 \times 10^3$ ) for pa-3\_a\_final. The Anisotropic displacement factor exponent takes the form:  $-2\pi^2[h^2a^2U_{11}+2hka*b*U_{12}+\dots]$ .**

| Atom | $U_{11}$  | $U_{22}$  | $U_{33}$  | $U_{23}$  | $U_{13}$   | $U_{12}$  |
|------|-----------|-----------|-----------|-----------|------------|-----------|
| F1   | 21.6 (7)  | 21.6 (7)  | 21.6 (7)  | -6.2 (8)  | 6.2 (8)    | 6.2 (8)   |
| All  | 14.3 (2)  | 14.3 (2)  | 14.3 (2)  | -2.4 (3)  | 2.4 (3)    | 2.4 (3)   |
| O1_2 | 20 (2)    | 19 (3)    | 32 (2)    | 6.4 (18)  | -5.1 (15)  | 3.2 (18)  |
| C1_2 | 21 (3)    | 20 (2)    | 21.8 (13) | 0.1 (14)  | -3.8 (15)  | 4.5 (14)  |
| C2_2 | 26 (3)    | 33 (3)    | 29 (3)    | -5 (3)    | -2 (3)     | 6 (3)     |
| F1_2 | 39 (6)    | 61 (4)    | 25.2 (9)  | -8.4 (11) | 0.7 (15)   | 12 (2)    |
| F2_2 | 34 (5)    | 41 (6)    | 53 (9)    | -18 (5)   | -12 (5)    | 27 (4)    |
| F3_2 | 39 (3)    | 21 (2)    | 57 (3)    | -9 (2)    | -12 (2)    | 8.3 (19)  |
| C3_2 | 29 (3)    | 37 (3)    | 26 (3)    | 9 (2)     | 1 (2)      | 6 (2)     |
| F4_2 | 38 (3)    | 49.1 (12) | 43 (4)    | 21.0 (18) | -1 (3)     | -5 (3)    |
| F5_2 | 49 (4)    | 56 (4)    | 32 (4)    | 23 (3)    | -2 (3)     | 16 (3)    |
| F6_2 | 44 (4)    | 63 (6)    | 26 (3)    | -1 (4)    | 10 (3)     | 14 (4)    |
| C4_2 | 21 (3)    | 29 (3)    | 29 (3)    | -4 (2)    | -6 (2)     | 6 (2)     |
| F7_2 | 45 (2)    | 23 (3)    | 55.9 (13) | -14 (3)   | -12.1 (13) | 4 (3)     |
| F8_2 | 33 (3)    | 36 (3)    | 31 (3)    | -6 (2)    | -17 (2)    | 6 (3)     |
| F9_2 | 24 (2)    | 38 (3)    | 40 (3)    | 2 (2)     | -0.3 (18)  | -7 (2)    |
| O1_1 | 20 (2)    | 19 (3)    | 32 (2)    | 6.4 (18)  | -5.1 (15)  | 3.2 (18)  |
| C1_1 | 21 (3)    | 20 (2)    | 21.8 (13) | 0.1 (14)  | -3.8 (15)  | 4.5 (14)  |
| C2_1 | 25 (3)    | 36 (3)    | 29 (3)    | 0 (2)     | -2 (2)     | 10 (2)    |
| F1_1 | 21.1 (16) | 46 (2)    | 58 (3)    | 8 (2)     | 5.8 (16)   | 2.7 (17)  |
| F2_1 | 32 (3)    | 42 (4)    | 31 (3)    | 4 (3)     | 1 (2)      | 16 (3)    |
| F3_1 | 39 (6)    | 61 (4)    | 25.2 (9)  | -8.4 (11) | 0.7 (15)   | 12 (2)    |
| C3_1 | 40 (3)    | 27 (2)    | 29 (3)    | 3.5 (19)  | -7 (2)     | 3 (2)     |
| F4_1 | 38 (3)    | 49.1 (12) | 43 (4)    | 21.0 (18) | -1 (3)     | -5 (3)    |
| F5_1 | 63 (3)    | 22.6 (17) | 43 (2)    | -2.9 (15) | -13 (2)    | -1.5 (19) |
| F6_1 | 62 (3)    | 40 (3)    | 35 (3)    | 13 (2)    | -16 (2)    | 9 (2)     |

|      |           |           |           |           |            |            |
|------|-----------|-----------|-----------|-----------|------------|------------|
| C4_1 | 28 (3)    | 31 (2)    | 39 (3)    | -10 (2)   | -7 (2)     | 6 (2)      |
| F7_1 | 49 (4)    | 57 (4)    | 32 (3)    | -15 (3)   | 2 (2)      | 13 (3)     |
| F8_1 | 34 (3)    | 53 (3)    | 43 (3)    | -17 (2)   | -17 (2)    | 12 (2)     |
| F9_1 | 45 (2)    | 23 (3)    | 55.9 (13) | -14 (3)   | -12.1 (13) | 4 (3)      |
| O1   | 52.5 (17) | 51.4 (17) | 85 (2)    | 9.7 (16)  | 14.7 (16)  | -12.7 (14) |
| C1   | 43 (2)    | 48 (2)    | 61 (2)    | 16.1 (18) | 13.8 (18)  | -4.4 (17)  |
| Cr1  | 48.8 (4)  | 48.8 (4)  | 48.8 (4)  | 13.3 (3)  | 13.3 (3)   | -13.3 (3)  |

**Bond Lengths for pa-3\_a\_final.**

| Atom | Atom              | Length/Å    | Atom Atom | Length/Å   |
|------|-------------------|-------------|-----------|------------|
| F1   | All               | 1.7602 (12) | C4_2 F7_2 | 1.328 (13) |
| F1   | All <sup>1</sup>  | 1.7602 (12) | C4_2 F9_2 | 1.337 (7)  |
| All  | O1_2              | 1.69 (3)    | C4_2 F8_2 | 1.338 (8)  |
| All  | O1_2 <sup>2</sup> | 1.69 (3)    | O1_1 C1_1 | 1.358 (13) |
| All  | O1_2 <sup>3</sup> | 1.69 (3)    | C1_1 C4_1 | 1.545 (12) |
| All  | O1_1 <sup>2</sup> | 1.71 (3)    | C1_1 C2_1 | 1.549 (12) |
| All  | O1_1 <sup>3</sup> | 1.71 (3)    | C1_1 C3_1 | 1.551 (11) |
| All  | O1_1              | 1.71 (3)    | C2_1 F2_1 | 1.324 (11) |
| O1_2 | C1_2              | 1.356 (16)  | C2_1 F3_1 | 1.326 (12) |
| C1_2 | C3_2              | 1.551 (16)  | C2_1 F1_1 | 1.337 (7)  |
| C1_2 | C2_2              | 1.555 (15)  | C3_1 F4_1 | 1.324 (11) |
| C1_2 | C4_2              | 1.560 (14)  | C3_1 F5_1 | 1.325 (6)  |
| C2_2 | F2_2              | 1.323 (12)  | C3_1 F6_1 | 1.325 (7)  |
| C2_2 | F1_2              | 1.328 (13)  | C4_1 F7_1 | 1.319 (9)  |
| C2_2 | F3_2              | 1.346 (9)   | C4_1 F8_1 | 1.331 (7)  |
| C3_2 | F6_2              | 1.327 (10)  | C4_1 F9_1 | 1.338 (11) |
| C3_2 | F5_2              | 1.332 (8)   | O1 C1     | 1.125 (5)  |
| C3_2 | F4_2              | 1.336 (13)  | C1 Cr1    | 1.949 (4)  |

<sup>1</sup>2-X,-Y,1-Z; <sup>2</sup>3/2-Z,1-X,1/2+Y; <sup>3</sup>1-Y,-1/2+Z,3/2-X

**Bond Angles for pa-3\_a\_final.**

| Atom Atom Atom                          | Angle/°    | Atom Atom Atom                      | Angle/°     |
|-----------------------------------------|------------|-------------------------------------|-------------|
| All F1 All <sup>1</sup>                 | 180.00 (4) | C1_1 O1_1 All                       | 148.5 (17)  |
| O1_2 All O1_2 <sup>2</sup>              | 114.8 (8)  | O1_1 C1_1 C4_1                      | 110.2 (14)  |
| O1_2 All O1_2 <sup>3</sup>              | 114.8 (8)  | O1_1 C1_1 C2_1                      | 110.7 (14)  |
| O1_2 <sup>2</sup> All O1_2 <sup>3</sup> | 114.8 (8)  | C4_1 C1_1 C2_1                      | 110.1 (10)  |
| O1_2 All O1_1 <sup>2</sup>              | 117.9 (16) | O1_1 C1_1 C3_1                      | 107.2 (14)  |
| O1_2 <sup>2</sup> All O1_1 <sup>2</sup> | 4.5 (18)   | C4_1 C1_1 C3_1                      | 109.3 (10)  |
| O1_2 <sup>3</sup> All O1_1 <sup>2</sup> | 110.2 (17) | C2_1 C1_1 C3_1                      | 109.3 (10)  |
| O1_1 <sup>2</sup> All O1_1 <sup>3</sup> | 113.4 (7)  | F2_1 C2_1 F3_1                      | 108.4 (14)  |
| O1_1 <sup>2</sup> All O1_1              | 113.4 (7)  | F2_1 C2_1 F1_1                      | 106.7 (8)   |
| O1_1 <sup>3</sup> All O1_1              | 113.4 (7)  | F3_1 C2_1 F1_1                      | 107.7 (8)   |
| O1_2 All F1                             | 103.4 (10) | F2_1 C2_1 C1_1                      | 114.4 (12)  |
| O1_2 <sup>2</sup> All F1                | 103.4 (10) | F3_1 C2_1 C1_1                      | 109.0 (14)  |
| O1_2 <sup>3</sup> All F1                | 103.4 (10) | F1_1 C2_1 C1_1                      | 110.4 (6)   |
| O1_1 <sup>2</sup> All F1                | 105.2 (8)  | F4_1 C3_1 F5_1                      | 107.4 (8)   |
| O1_1 <sup>3</sup> All F1                | 105.2 (8)  | F4_1 C3_1 F6_1                      | 109.4 (9)   |
| O1_1 All F1                             | 105.2 (8)  | F5_1 C3_1 F6_1                      | 107.6 (5)   |
| C1_2 O1_2 All                           | 149 (2)    | F4_1 C3_1 C1_1                      | 109.4 (11)  |
| O1_2 C1_2 C3_2                          | 108.7 (18) | F5_1 C3_1 C1_1                      | 111.2 (5)   |
| O1_2 C1_2 C2_2                          | 110.2 (18) | F6_1 C3_1 C1_1                      | 111.7 (9)   |
| C3_2 C1_2 C2_2                          | 109.3 (13) | F7_1 C4_1 F8_1                      | 108.2 (7)   |
| O1_2 C1_2 C4_2                          | 110.8 (18) | F7_1 C4_1 F9_1                      | 107.7 (8)   |
| C3_2 C1_2 C4_2                          | 108.8 (13) | F8_1 C4_1 F9_1                      | 107.3 (11)  |
| C2_2 C1_2 C4_2                          | 109.0 (13) | F7_1 C4_1 C1_1                      | 112.2 (7)   |
| F2_2 C2_2 F1_2                          | 109.3 (17) | F8_1 C4_1 C1_1                      | 111.9 (9)   |
| F2_2 C2_2 F3_2                          | 107.1 (11) | F9_1 C4_1 C1_1                      | 109.3 (12)  |
| F1_2 C2_2 F3_2                          | 107.9 (11) | O1 C1 Cr1                           | 178.8 (4)   |
| F2_2 C2_2 C1_2                          | 109.9 (15) | C1 <sup>4</sup> Cr1 C1 <sup>5</sup> | 89.28 (16)  |
| F1_2 C2_2 C1_2                          | 112.2 (19) | C1 <sup>4</sup> Cr1 C1 <sup>6</sup> | 90.72 (16)  |
| F3_2 C2_2 C1_2                          | 110.2 (7)  | C1 <sup>5</sup> Cr1 C1 <sup>6</sup> | 180.00 (13) |
| F6_2 C3_2 F5_2                          | 107.4 (9)  | C1 <sup>4</sup> Cr1 C1 <sup>7</sup> | 89.28 (16)  |
| F6_2 C3_2 F4_2                          | 108.2 (11) | C1 <sup>5</sup> Cr1 C1 <sup>7</sup> | 89.28 (16)  |
| F5_2 C3_2 F4_2                          | 106.5 (11) | C1 <sup>6</sup> Cr1 C1 <sup>7</sup> | 90.72 (16)  |
| F6_2 C3_2 C1_2                          | 111.0 (8)  | C1 <sup>4</sup> Cr1 C1 <sup>8</sup> | 90.72 (16)  |
| F5_2 C3_2 C1_2                          | 112.4 (12) | C1 <sup>5</sup> Cr1 C1 <sup>8</sup> | 90.72 (16)  |
| F4_2 C3_2 C1_2                          | 111.2 (14) | C1 <sup>6</sup> Cr1 C1 <sup>8</sup> | 89.28 (16)  |

|                |            |     |     |     |            |
|----------------|------------|-----|-----|-----|------------|
| F7_2 C4_2 F9_2 | 107.4 (10) | Cr1 | Cr1 | Cr1 | 180.0 (2)  |
| F7_2 C4_2 F8_2 | 108.5 (15) | Cr1 | Cr1 | Cr1 | 180.0      |
| F9_2 C4_2 F8_2 | 106.7 (5)  | Cr1 | Cr1 | Cr1 | 90.72 (16) |
| F7_2 C4_2 C1_2 | 110.6 (16) | Cr1 | Cr1 | Cr1 | 89.28 (16) |
| F9_2 C4_2 C1_2 | 110.9 (6)  | Cr1 | Cr1 | Cr1 | 90.72 (16) |
| F8_2 C4_2 C1_2 | 112.4 (12) | Cr1 | Cr1 | Cr1 | 89.28 (16) |

<sup>1</sup>/<sub>2</sub>-X,-Y,1-Z; <sup>2</sup>/<sub>3</sub>/<sub>2</sub>-Z,1-X,1/2+Y; <sup>3</sup>/<sub>1</sub>-Y,-1/2+Z,3/2-X; <sup>4</sup>/<sub>1</sub>-X,-Y,1-Z; <sup>5</sup>/<sub>+</sub>Z,1/2-X,1/2+Y; <sup>6</sup>/<sub>1</sub>-Z,-1/2+X,1/2-Y; <sup>7</sup>/<sub>1</sub>/<sub>2</sub>-Y,-1/2+Z,+X; <sup>8</sup>/<sub>1</sub>/<sub>2</sub>+Y,1/2-Z,1-X

#### Torsion Angles for pa-3\_a\_final.

| A                     | B    | C    | D    | Angle/°     | A                     | B    | C    | D    | Angle/°    |
|-----------------------|------|------|------|-------------|-----------------------|------|------|------|------------|
| O1_2 <sup>1</sup> All | O1_2 | C1_2 |      | -133 (3)    | O1_1 <sup>1</sup> All | O1_1 | C1_1 |      | -136 (2)   |
| O1_2 <sup>2</sup> All | O1_2 | C1_2 |      | 3 (6)       | O1_1 <sup>2</sup> All | O1_1 | C1_1 |      | -5 (4)     |
| F1                    | All  | O1_2 | C1_2 | 115 (4)     | F1                    | All  | O1_1 | C1_1 | 109 (3)    |
| All                   | O1_2 | C1_2 | C3_2 | -153 (4)    | All                   | O1_1 | C1_1 | C4_1 | -68 (3)    |
| All                   | O1_2 | C1_2 | C2_2 | 87 (4)      | All                   | O1_1 | C1_1 | C2_1 | 54 (3)     |
| All                   | O1_2 | C1_2 | C4_2 | -33 (5)     | All                   | O1_1 | C1_1 | C3_1 | 173 (3)    |
| O1_2                  | C1_2 | C2_2 | F2_2 | -168.1 (18) | O1_1                  | C1_1 | C2_1 | F2_1 | 160.7 (14) |
| C3_2                  | C1_2 | C2_2 | F2_2 | 72.5 (18)   | C4_1                  | C1_1 | C2_1 | F2_1 | -77.3 (14) |
| C4_2                  | C1_2 | C2_2 | F2_2 | -46.3 (19)  | C3_1                  | C1_1 | C2_1 | F2_1 | 42.8 (15)  |
| O1_2                  | C1_2 | C2_2 | F1_2 | -46 (2)     | O1_1                  | C1_1 | C2_1 | F3_1 | 39.2 (16)  |
| C3_2                  | C1_2 | C2_2 | F1_2 | -165.7 (17) | C4_1                  | C1_1 | C2_1 | F3_1 | 161.2 (15) |
| C4_2                  | C1_2 | C2_2 | F1_2 | 76 (2)      | C3_1                  | C1_1 | C2_1 | F3_1 | -78.7 (16) |
| O1_2                  | C1_2 | C2_2 | F3_2 | 74.0 (16)   | O1_1                  | C1_1 | C2_1 | F1_1 | -78.9 (12) |
| C3_2                  | C1_2 | C2_2 | F3_2 | -45.4 (18)  | C4_1                  | C1_1 | C2_1 | F1_1 | 43.1 (15)  |
| C4_2                  | C1_2 | C2_2 | F3_2 | -164.2 (11) | C3_1                  | C1_1 | C2_1 | F1_1 | 163.1 (9)  |
| O1_2                  | C1_2 | C3_2 | F6_2 | 76.8 (17)   | O1_1                  | C1_1 | C3_1 | F4_1 | 42.4 (14)  |
| C2_2                  | C1_2 | C3_2 | F6_2 | -162.9 (13) | C4_1                  | C1_1 | C3_1 | F4_1 | -77.0 (15) |
| C4_2                  | C1_2 | C3_2 | F6_2 | -44 (2)     | C2_1                  | C1_1 | C3_1 | F4_1 | 162.4 (12) |
| O1_2                  | C1_2 | C3_2 | F5_2 | -162.9 (15) | O1_1                  | C1_1 | C3_1 | F5_1 | -76.1 (12) |
| C2_2                  | C1_2 | C3_2 | F5_2 | -42.6 (17)  | C4_1                  | C1_1 | C3_1 | F5_1 | 164.5 (9)  |
| C4_2                  | C1_2 | C3_2 | F5_2 | 76.3 (14)   | C2_1                  | C1_1 | C3_1 | F5_1 | 44.0 (15)  |
| O1_2                  | C1_2 | C3_2 | F4_2 | -43.7 (18)  | O1_1                  | C1_1 | C3_1 | F6_1 | 163.6 (12) |
| C2_2                  | C1_2 | C3_2 | F4_2 | 77 (2)      | C4_1                  | C1_1 | C3_1 | F6_1 | 44.3 (13)  |
| C4_2                  | C1_2 | C3_2 | F4_2 | -164.5 (15) | C2_1                  | C1_1 | C3_1 | F6_1 | -76.3 (11) |
| O1_2                  | C1_2 | C4_2 | F7_2 | -41 (2)     | O1_1                  | C1_1 | C4_1 | F7_1 | -74.5 (14) |
| C3_2                  | C1_2 | C4_2 | F7_2 | 79 (2)      | C2_1                  | C1_1 | C4_1 | F7_1 | 163.2 (10) |
| C2_2                  | C1_2 | C4_2 | F7_2 | -162.0 (17) | C3_1                  | C1_1 | C4_1 | F7_1 | 43.1 (16)  |
| O1_2                  | C1_2 | C4_2 | F9_2 | 78.6 (16)   | O1_1                  | C1_1 | C4_1 | F8_1 | 163.7 (12) |
| C3_2                  | C1_2 | C4_2 | F9_2 | -161.9 (11) | C2_1                  | C1_1 | C4_1 | F8_1 | 41.4 (13)  |
| C2_2                  | C1_2 | C4_2 | F9_2 | -42.9 (19)  | C3_1                  | C1_1 | C4_1 | F8_1 | -78.7 (12) |
| O1_2                  | C1_2 | C4_2 | F8_2 | -162.0 (15) | O1_1                  | C1_1 | C4_1 | F9_1 | 45.0 (15)  |
| C3_2                  | C1_2 | C4_2 | F8_2 | -42.5 (17)  | C2_1                  | C1_1 | C4_1 | F9_1 | -77.4 (16) |
| C2_2                  | C1_2 | C4_2 | F8_2 | 76.5 (15)   | C3_1                  | C1_1 | C4_1 | F9_1 | 162.6 (13) |

<sup>1</sup>/<sub>3</sub>/<sub>2</sub>-Z,1-X,1/2+Y; <sup>2</sup>/<sub>1</sub>-Y,-1/2+Z,3/2-X

#### Atomic Occupancy for pa-3\_a\_final.

| Atom | Occupancy | Atom | Occupancy | Atom | Occupancy |
|------|-----------|------|-----------|------|-----------|
| O1_2 | 0.438 (5) | C1_2 | 0.438 (5) | C2_2 | 0.438 (5) |
| F1_2 | 0.438 (5) | F2_2 | 0.438 (5) | F3_2 | 0.438 (5) |
| C3_2 | 0.438 (5) | F4_2 | 0.438 (5) | F5_2 | 0.438 (5) |
| F6_2 | 0.438 (5) | C4_2 | 0.438 (5) | F7_2 | 0.438 (5) |
| F8_2 | 0.438 (5) | F9_2 | 0.438 (5) | O1_1 | 0.562 (5) |
| C1_1 | 0.562 (5) | C2_1 | 0.562 (5) | F1_1 | 0.562 (5) |
| F2_1 | 0.562 (5) | F3_1 | 0.562 (5) | C3_1 | 0.562 (5) |
| F4_1 | 0.562 (5) | F5_1 | 0.562 (5) | F6_1 | 0.562 (5) |
| C4_1 | 0.562 (5) | F7_1 | 0.562 (5) | F8_1 | 0.562 (5) |
| F9_1 | 0.562 (5) |      |           |      |           |

### Modelling of the NO-disorder for $[\text{Cr}(\text{CO})_5(\text{NO})][\text{F}-\{\text{Al}(\text{OR}^{\text{F}})_3\}_2]$

The inclusion of 1/6 NO led to a change of the  $R_1$  value from 6.03% to 5.99% (Supplementary Figure 72). However, the NO ligands resulted in a slightly tilted octahedron. Supplementary Data 7 gives full information on crystallographic data.

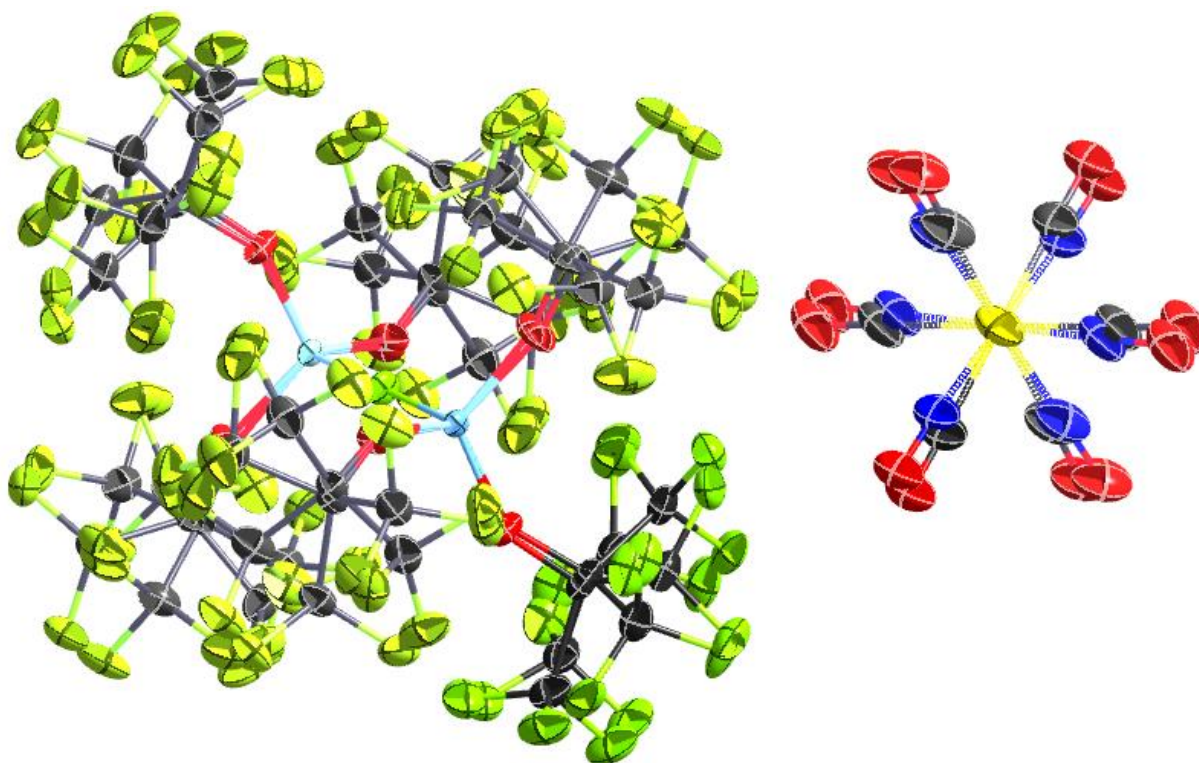

Supplementary Figure 72. Disorder model for 4.

Supplementary Table 9. Resulting bond lengths from the disorder model for 4.

| w/o disorder [pm] |          | With NO disorder [pm] |           |          |        |
|-------------------|----------|-----------------------|-----------|----------|--------|
| d(Cr-C1)          | 194.9(4) | d(Cr-C1)              | 197.3(14) | d(Cr-N1) | 186(7) |

The low bond precision for the Cr-N bond (Supplementary Table 9) as well as the tilted structure of the cation underline the question, if the refinement of a disordered NO actually yields a scientifically more accurate structure model. Therefore, we decided to leave the NO data out and just report the average bond lengths in the manuscript.

The disordered crystal structure was also deployed in the CCDC (Accession number: 1886542)

**Crystal data and structure refinement for pa-3\_a\_NO\_disorder.**

|                                             |                                                                     |
|---------------------------------------------|---------------------------------------------------------------------|
| Identification code                         | pa-3_a_NO_disorder                                                  |
| Empirical formula                           | C <sub>29</sub> NO <sub>12</sub> F <sub>55</sub> Al <sub>2</sub> Cr |
| Formula weight                              | 1705.20                                                             |
| Temperature/K                               | 100.03                                                              |
| Crystal system                              | cubic                                                               |
| Space group                                 | Pa-3                                                                |
| a/Å                                         | 17.2474(3)                                                          |
| b/Å                                         | 17.2474(3)                                                          |
| c/Å                                         | 17.2474(3)                                                          |
| α/°                                         | 90                                                                  |
| β/°                                         | 90                                                                  |
| γ/°                                         | 90                                                                  |
| Volume/Å <sup>3</sup>                       | 5130.63(15)                                                         |
| Z                                           | 4                                                                   |
| ρ <sub>calc</sub> /cm <sup>3</sup>          | 2.2074                                                              |
| μ/mm <sup>-1</sup>                          | 0.516                                                               |
| F(000)                                      | 3294.4                                                              |
| Crystal size/mm <sup>3</sup>                | 0.4 × 0.3 × 0.2                                                     |
| Radiation                                   | Mo Kα (λ = 0.71073)                                                 |
| 2θ range for data collection/°              | 4.1 to 57.32                                                        |
| Index ranges                                | -23 ≤ h ≤ 12, -15 ≤ k ≤ 23, -19 ≤ l ≤ 22                            |
| Reflections collected                       | 13204                                                               |
| Independent reflections                     | 2197 [R <sub>int</sub> = 0.0216, R <sub>sigma</sub> = 0.0152]       |
| Data/restraints/parameters                  | 2197/1/255                                                          |
| Goodness-of-fit on F <sup>2</sup>           | 1.267                                                               |
| Final R indexes [I >= 2σ (I)]               | R <sub>1</sub> = 0.0599, wR <sub>2</sub> = 0.1028                   |
| Final R indexes [all data]                  | R <sub>1</sub> = 0.0638, wR <sub>2</sub> = 0.1042                   |
| Largest diff. peak/hole / e Å <sup>-3</sup> | 0.38/-0.48                                                          |

*Supplementary Data 7. Information on the crystallographic data of disordered 4.*

**Fractional Atomic Coordinates (×10<sup>4</sup>) and Equivalent Isotropic Displacement Parameters (Å<sup>2</sup>×10<sup>3</sup>) for pa-3\_a\_NO\_disorder. U<sub>eq</sub> is defined as 1/3 of the trace of the orthogonalised U<sub>ij</sub> tensor.**

| Atom | x          | y         | z          | U(eq)     |
|------|------------|-----------|------------|-----------|
| F1   | 10000      | 0         | 5000       | 21.5 (7)  |
| Al1  | 9410.8 (4) | 589.2 (4) | 5589.2 (4) | 14.2 (2)  |
| O1   | 5807 (5)   | 1523 (4)  | 5474 (4)   | 56.4 (13) |
| C1   | 5507 (8)   | 979 (6)   | 5307 (8)   | 48.2 (16) |
| O2   | 5880 (30)  | 1400 (30) | 5650 (30)  | 56.4 (13) |
| N1   | 5550 (40)  | 840 (30)  | 5400 (40)  | 48.2 (16) |
| Cr1  | 5000       | 0         | 5000       | 48.6 (4)  |
| O1_2 | 9120 (20)  | 1236 (14) | 4950 (20)  | 18.5 (19) |
| C1_2 | 8500 (20)  | 1620 (20) | 4518 (15)  | 15.2 (19) |
| C2_2 | 8117 (4)   | 2256 (5)  | 5114 (4)   | 29.5 (16) |
| F1_2 | 8010 (50)  | 2020 (70) | 5830 (60)  | 43 (5)    |
| F2_2 | 7474 (15)  | 2471 (13) | 4824 (11)  | 45 (5)    |
| F3_2 | 8577 (3)   | 2886 (3)  | 5146 (4)   | 38.3 (13) |
| C3_2 | 8801 (4)   | 1997 (4)  | 3841 (4)   | 29.9 (16) |
| F4_2 | 9480 (20)  | 2370 (30) | 3950 (20)  | 43 (3)    |
| F5_2 | 8308 (5)   | 2512 (5)  | 3545 (4)   | 45.8 (17) |
| F6_2 | 8928 (13)  | 1466 (9)  | 3295 (13)  | 46 (3)    |
| C4_2 | 7863 (4)   | 1007 (4)  | 4379 (4)   | 26.5 (15) |
| F7_2 | 8200 (40)  | 350 (30)  | 4150 (50)  | 41 (4)    |
| F8_2 | 7379 (4)   | 1263 (4)  | 3827 (4)   | 32.8 (14) |
| F9_2 | 7424 (3)   | 831 (3)   | 4993 (3)   | 33.9 (11) |
| O1_1 | 9111 (17)  | 1375 (10) | 5027 (15)  | 18.5 (19) |
| C1_1 | 8555 (15)  | 1699 (15) | 4665 (10)  | 15.2 (19) |
| C2_1 | 7854 (3)   | 1866 (4)  | 5139 (3)   | 30.2 (13) |
| F1_1 | 7430 (2)   | 1220 (3)  | 5228 (3)   | 41.6 (10) |
| F2_1 | 7359 (11)  | 2414 (10) | 4868 (7)   | 32 (2)    |
| F3_1 | 8100 (40)  | 2070 (50) | 5830 (40)  | 43 (5)    |
| C3_1 | 8894 (3)   | 2483 (3)  | 4312 (3)   | 32.9 (13) |
| F4_1 | 9598 (17)  | 2380 (20) | 4066 (16)  | 43 (3)    |
| F5_1 | 8936 (3)   | 3001 (2)  | 4879 (3)   | 42.9 (11) |

|      |           |          |           |           |
|------|-----------|----------|-----------|-----------|
| F6_1 | 8459 (4)  | 2786 (3) | 3754 (3)  | 45.6 (13) |
| C4_1 | 8311 (3)  | 1206 (3) | 3906 (3)  | 33.5 (14) |
| F7_1 | 8827 (11) | 1225 (7) | 3345 (10) | 46 (2)    |
| F8_1 | 7631 (3)  | 1429 (4) | 3621 (4)  | 43.8 (14) |
| F9_1 | 8230 (30) | 470 (20) | 4120 (40) | 41 (4)    |

Anisotropic Displacement Parameters ( $\text{\AA}^2 \times 10^3$ ) for pa-3\_a\_NO\_disorder. The Anisotropic displacement factor exponent takes the form:  $-2\pi^2[h^2a^*U_{11}+2hka^*b^*U_{12}+\dots]$ .

| Atom | U <sub>11</sub> | U <sub>22</sub> | U <sub>33</sub> | U <sub>12</sub> | U <sub>13</sub> | U <sub>23</sub> |
|------|-----------------|-----------------|-----------------|-----------------|-----------------|-----------------|
| F1   | 21.5 (7)        | 21.5 (7)        | 21.5 (7)        | 6.4 (8)         | 6.4 (8)         | -6.4 (8)        |
| Al1  | 14.2 (2)        | 14.2 (2)        | 14.2 (2)        | 2.4 (3)         | 2.4 (3)         | -2.4 (3)        |
| O1   | 51 (2)          | 44 (3)          | 75 (4)          | -10 (2)         | 10 (3)          | 18 (2)          |
| C1   | 44 (3)          | 42 (5)          | 59 (4)          | -1 (3)          | 12 (3)          | 23 (3)          |
| O2   | 51 (2)          | 44 (3)          | 75 (4)          | -10 (2)         | 10 (3)          | 18 (2)          |
| N1   | 44 (3)          | 42 (5)          | 59 (4)          | -1 (3)          | 12 (3)          | 23 (3)          |
| Cr1  | 48.6 (4)        | 48.6 (4)        | 48.6 (4)        | -13.2 (3)       | 13.2 (3)        | 13.2 (3)        |
| O1_2 | 21.6 (9)        | 6 (6)           | 28 (5)          | 6 (5)           | -3 (3)          | -1 (4)          |
| C1_2 | 21 (4)          | 20 (5)          | 4 (7)           | 4 (3)           | -10 (4)         | -9 (4)          |
| C2_2 | 25 (4)          | 35 (4)          | 28 (3)          | 5 (3)           | -1 (3)          | -4 (3)          |
| F1_2 | 42 (12)         | 62 (8)          | 25.1 (9)        | 14 (8)          | 1 (7)           | -9 (3)          |
| F2_2 | 27 (7)          | 48 (6)          | 60 (8)          | 24 (5)          | -6 (4)          | -26 (6)         |
| F3_2 | 38 (3)          | 21 (2)          | 56 (4)          | 8 (2)           | -12 (2)         | -8 (2)          |
| C3_2 | 29 (3)          | 36 (4)          | 25 (3)          | 6 (3)           | 1 (3)           | 8 (3)           |
| F4_2 | 42 (8)          | 49.2 (13)       | 37 (8)          | -7 (5)          | -3 (4)          | 20 (5)          |
| F5_2 | 50 (4)          | 55 (5)          | 32 (4)          | 16 (3)          | -2 (3)          | 22 (3)          |
| F6_2 | 45 (6)          | 67 (9)          | 26 (3)          | 16 (6)          | 11 (3)          | 1 (6)           |
| C4_2 | 21 (3)          | 30 (3)          | 29 (3)          | 8 (2)           | -6 (3)          | -6 (3)          |
| F7_2 | 47 (8)          | 20 (9)          | 56 (7)          | 3 (6)           | -13 (5)         | -11 (7)         |
| F8_2 | 32 (4)          | 36 (3)          | 31 (3)          | 7 (3)           | -17 (2)         | -6 (2)          |
| F9_2 | 24 (2)          | 38 (3)          | 40 (3)          | -7 (2)          | 0.2 (18)        | 2 (2)           |
| O1_1 | 21.6 (9)        | 6 (6)           | 28 (5)          | 6 (5)           | -3 (3)          | -1 (4)          |
| C1_1 | 21 (4)          | 20 (5)          | 4 (7)           | 4 (3)           | -10 (4)         | -9 (4)          |
| C2_1 | 25 (3)          | 37 (3)          | 29 (3)          | 11 (3)          | -2 (2)          | 0 (2)           |
| F1_1 | 20.9 (16)       | 46 (3)          | 58 (3)          | 2.6 (17)        | 5.9 (16)        | 8 (2)           |
| F2_1 | 26 (5)          | 41 (3)          | 30 (3)          | 17 (3)          | -3 (2)          | 5 (3)           |
| F3_1 | 42 (12)         | 62 (8)          | 25.1 (9)        | 14 (8)          | 1 (7)           | -9 (3)          |
| C3_1 | 41 (3)          | 29 (3)          | 29 (3)          | 4 (2)           | -7 (2)          | 3 (2)           |
| F4_1 | 42 (8)          | 49.2 (13)       | 37 (8)          | -7 (5)          | -3 (4)          | 20 (5)          |
| F5_1 | 63 (3)          | 22.7 (17)       | 43 (2)          | -1 (2)          | -13 (2)         | -3.1 (16)       |
| F6_1 | 62 (3)          | 39 (3)          | 35 (3)          | 10 (2)          | -15 (2)         | 13 (2)          |
| C4_1 | 28 (3)          | 31 (3)          | 41 (3)          | 7 (2)           | -7 (2)          | -9 (2)          |
| F7_1 | 50 (5)          | 59 (6)          | 31 (4)          | 14 (5)          | 2 (3)           | -14 (5)         |
| F8_1 | 33 (3)          | 54 (4)          | 44 (3)          | 12 (2)          | -17 (2)         | -18 (3)         |
| F9_1 | 47 (8)          | 20 (9)          | 56 (7)          | 3 (6)           | -13 (5)         | -11 (7)         |

**Bond Lengths for pa-3\_a\_NO\_disorder.**

| Atom | Atom              | Length/\AA  | Atom Atom | Length/\AA |
|------|-------------------|-------------|-----------|------------|
| F1   | Al1               | 1.7602 (12) | C3_2 F4_2 | 1.34 (4)   |
| F1   | Al1 <sup>1</sup>  | 1.7602 (12) | C3_2 F5_2 | 1.331 (10) |
| Al1  | O1_2              | 1.65 (4)    | C3_2 F6_2 | 1.33 (2)   |
| Al1  | O1_2 <sup>2</sup> | 1.65 (4)    | C4_2 F7_2 | 1.34 (7)   |
| Al1  | O1_2 <sup>3</sup> | 1.65 (4)    | C4_2 F8_2 | 1.342 (9)  |
| Al1  | O1_1 <sup>2</sup> | 1.75 (3)    | C4_2 F9_2 | 1.336 (8)  |
| Al1  | O1_1              | 1.75 (3)    | O1_1 C1_1 | 1.27 (4)   |
| Al1  | O1_1 <sup>3</sup> | 1.75 (3)    | C1_1 C2_1 | 1.49 (3)   |
| O1   | C1                | 1.111 (18)  | C1_1 C3_1 | 1.59 (3)   |
| C1   | Cr1 <sup>4</sup>  | 1.973 (14)  | C1_1 C4_1 | 1.617 (13) |
| O2   | N1                | 1.20 (9)    | C2_1 F1_1 | 1.341 (9)  |
| N1   | Cr1 <sup>4</sup>  | 1.86 (7)    | C2_1 F2_1 | 1.357 (14) |
| O1_2 | C1_2              | 1.47 (5)    | C2_1 F3_1 | 1.32 (7)   |
| C1_2 | C2_2              | 1.64 (3)    | C3_1 F4_1 | 1.30 (4)   |
| C1_2 | C3_2              | 1.43 (4)    | C3_1 F5_1 | 1.326 (7)  |
| C1_2 | C4_2              | 1.54 (3)    | C3_1 F6_1 | 1.328 (8)  |
| C2_2 | F1_2              | 1.32 (10)   | C4_1 F7_1 | 1.316 (17) |
| C2_2 | F2_2              | 1.27 (2)    | C4_1 F8_1 | 1.330 (8)  |
| C2_2 | F3_2              | 1.346 (11)  | C4_1 F9_1 | 1.33 (4)   |

<sup>1</sup>2-X,-Y,1-Z; <sup>2</sup>1-Y,-1/2+Z,3/2-X; <sup>3</sup>3/2-Z,1-X,1/2+Y; <sup>4</sup>1/2+Y,1/2-Z,1-X

**Bond Angles for pa-3\_a\_NO\_disorder.**

| Atom              | Atom | Atom              | Angle/°           | Atom | Atom | Atom | Angle/°   |
|-------------------|------|-------------------|-------------------|------|------|------|-----------|
| All <sup>1</sup>  | F1   | All               | 180.0             | F1_2 | C2_2 | C1_2 | 116(5)    |
| O1_2 <sup>2</sup> | All  | O1_2              | 116.9(6)          | F2_2 | C2_2 | C1_2 | 107.2(14) |
| O1_2 <sup>2</sup> | All  | O1_2 <sup>3</sup> | 116.9(5)          | F2_2 | C2_2 | F1_2 | 110(4)    |
| O1_2 <sup>3</sup> | All  | O1_2              | 116.9(5)          | F3_2 | C2_2 | C1_2 | 109.1(14) |
| O1_1              | All  | O1_1 <sup>3</sup> | 111.5(7)          | F3_2 | C2_2 | F1_2 | 107(4)    |
| O1_1 <sup>2</sup> | All  | O1_1 <sup>3</sup> | 111.5(6)          | F3_2 | C2_2 | F2_2 | 107.2(13) |
| O1_1 <sup>2</sup> | All  | O1_1              | 111.5(7)          | F4_2 | C3_2 | C1_2 | 115.1(19) |
| C1 <sup>4</sup>   | Cr1  | C1 <sup>5</sup>   | 91.7(5)           | F5_2 | C3_2 | C1_2 | 112.2(16) |
| C1 <sup>6</sup>   | Cr1  | C1 <sup>5</sup>   | 91.7(6)           | F5_2 | C3_2 | F4_2 | 106.5(19) |
| C1 <sup>7</sup>   | Cr1  | C1 <sup>4</sup>   | 88.3(6)           | F6_2 | C3_2 | C1_2 | 109.1(14) |
| C1 <sup>7</sup>   | Cr1  | C1 <sup>8</sup>   | 91.7(6)           | F6_2 | C3_2 | F4_2 | 106(2)    |
| C1 <sup>7</sup>   | Cr1  | C1                | 91.7(5)           | F6_2 | C3_2 | F5_2 | 107.0(12) |
| C1 <sup>7</sup>   | Cr1  | C1 <sup>5</sup>   | 180.0             | F7_2 | C4_2 | C1_2 | 109(3)    |
| C1 <sup>7</sup>   | Cr1  | C1 <sup>6</sup>   | 88.3(5)           | F8_2 | C4_2 | C1_2 | 108.9(14) |
| C1                | Cr1  | C1 <sup>8</sup>   | 88.3(5)           | F8_2 | C4_2 | F7_2 | 110(4)    |
| C1 <sup>4</sup>   | Cr1  | C1                | 91.7(6)           | F9_2 | C4_2 | C1_2 | 115.8(12) |
| C1 <sup>5</sup>   | Cr1  | C1 <sup>8</sup>   | 88.3(6)           | F9_2 | C4_2 | F7_2 | 107(3)    |
| C1 <sup>6</sup>   | Cr1  | C1                | 180.0             | F9_2 | C4_2 | F8_2 | 106.6(5)  |
| C1 <sup>5</sup>   | Cr1  | C1                | 88.3(5)           | C2_1 | C1_1 | O1_1 | 115.3(19) |
| C1 <sup>4</sup>   | Cr1  | C1 <sup>8</sup>   | 180.0             | C3_1 | C1_1 | O1_1 | 106(2)    |
| C1 <sup>4</sup>   | Cr1  | C1 <sup>6</sup>   | 88.3(6)           | C3_1 | C1_1 | C2_1 | 110.1(16) |
| C1 <sup>6</sup>   | Cr1  | C1 <sup>8</sup>   | 91.7(5)           | C4_1 | C1_1 | O1_1 | 111.2(17) |
| N1                | Cr1  | N1 <sup>8</sup>   | 95(2)             | C4_1 | C1_1 | C2_1 | 109.6(14) |
| N1 <sup>7</sup>   | Cr1  | N1 <sup>8</sup>   | 85(3)             | C4_1 | C1_1 | C3_1 | 103.5(12) |
| N1 <sup>4</sup>   | Cr1  | N1 <sup>8</sup>   | 179.999999146(19) | F1_1 | C2_1 | C1_1 | 110.2(10) |
| N1 <sup>4</sup>   | Cr1  | N1 <sup>5</sup>   | 85(2)             | F2_1 | C2_1 | C1_1 | 117.2(13) |
| N1 <sup>6</sup>   | Cr1  | N1 <sup>5</sup>   | 85(3)             | F2_1 | C2_1 | F1_1 | 106.0(10) |
| N1 <sup>7</sup>   | Cr1  | N1 <sup>6</sup>   | 95(2)             | F3_1 | C2_1 | C1_1 | 107(3)    |
| N1 <sup>6</sup>   | Cr1  | N1 <sup>8</sup>   | 85(2)             | F3_1 | C2_1 | F1_1 | 107(3)    |
| N1 <sup>5</sup>   | Cr1  | N1 <sup>8</sup>   | 95(3)             | F3_1 | C2_1 | F2_1 | 109(4)    |
| N1 <sup>7</sup>   | Cr1  | N1 <sup>5</sup>   | 180.0             | F4_1 | C3_1 | C1_1 | 110.4(19) |
| N1 <sup>7</sup>   | Cr1  | N1                | 85(2)             | F5_1 | C3_1 | C1_1 | 108.1(7)  |
| N1 <sup>7</sup>   | Cr1  | N1 <sup>4</sup>   | 95(3)             | F5_1 | C3_1 | F4_1 | 106.5(15) |
| N1 <sup>5</sup>   | Cr1  | N1                | 95(2)             | F6_1 | C3_1 | C1_1 | 113.8(9)  |
| N1 <sup>4</sup>   | Cr1  | N1 <sup>6</sup>   | 95(3)             | F6_1 | C3_1 | F4_1 | 110.2(11) |
| N1 <sup>4</sup>   | Cr1  | N1                | 85(3)             | F6_1 | C3_1 | F5_1 | 107.6(5)  |
| N1 <sup>6</sup>   | Cr1  | N1                | 180.0             | F7_1 | C4_1 | C1_1 | 113.9(13) |
| C2_2              | C1_2 | O1_2              | 106.2(16)         | F8_1 | C4_1 | C1_1 | 112.1(11) |
| C3_2              | C1_2 | O1_2              | 110(3)            | F8_1 | C4_1 | F7_1 | 108.5(10) |
| C3_2              | C1_2 | C2_2              | 111(2)            | F9_1 | C4_1 | C1_1 | 108(3)    |
| C4_2              | C1_2 | O1_2              | 106(3)            | F9_1 | C4_1 | F7_1 | 108(3)    |
| C4_2              | C1_2 | C2_2              | 106(2)            | F9_1 | C4_1 | F8_1 | 107(3)    |
| C4_2              | C1_2 | C3_2              | 116.3(13)         |      |      |      |           |

<sup>1</sup>2-X,-Y,1-Z; <sup>2</sup>3/2-Z,1-X,1/2+Y; <sup>3</sup>1-Y,-1/2+Z,3/2-X; <sup>4</sup>+Z,1/2-X,1/2+Y; <sup>5</sup>1/2+Y,1/2-Z,1-X; <sup>6</sup>1-X,-Y,1-Z; <sup>7</sup>1/2-Y,-1/2+Z,+X; <sup>8</sup>1-Z,-1/2+X,1/2-Y

**Atomic Occupancy for pa-3\_a\_NO\_disorder.**

| Atom | Occupancy | Atom | Occupancy | Atom | Occupancy |
|------|-----------|------|-----------|------|-----------|
| F1   | 1.000020  | O1   | 0.833330  | C1   | 0.833330  |
| O2   | 0.166670  | N1   | 0.166670  | Cr1  | 1.000020  |
| O1_2 | 0.436(6)  | C1_2 | 0.436(6)  | C2_2 | 0.436(6)  |
| F1_2 | 0.436(6)  | F2_2 | 0.436(6)  | F3_2 | 0.436(6)  |
| C3_2 | 0.436(6)  | F4_2 | 0.436(6)  | F5_2 | 0.436(6)  |
| F6_2 | 0.436(6)  | C4_2 | 0.436(6)  | F7_2 | 0.436(6)  |
| F8_2 | 0.436(6)  | F9_2 | 0.436(6)  | O1_1 | 0.564(6)  |
| C1_1 | 0.564(6)  | C2_1 | 0.564(6)  | F1_1 | 0.564(6)  |
| F2_1 | 0.564(6)  | F3_1 | 0.564(6)  | C3_1 | 0.564(6)  |
| F4_1 | 0.564(6)  | F5_1 | 0.564(6)  | F6_1 | 0.564(6)  |
| C4_1 | 0.564(6)  | F7_1 | 0.564(6)  | F8_1 | 0.564(6)  |
| F9_1 | 0.564(6)  |      |           |      |           |



## 15. Hirshfeld Plots

The Hirshfeld plots show that in **1** slight interactions of O1 with the counterion disturb the local symmetry, leading to small distortions and therefore only a tetragonal symmetry and three crystallographically independent CO positions. For **2** however, the even less coordinating  $[F-\{Al(OR^F)_3\}_2]$  shows hardly any interaction with the  $[Cr(CO)_6]^{*+}$  cation, therefore an undisturbed  $D_{3d}$  local symmetry and only one crystallographically independent CO position (Supplementary Figure 73).

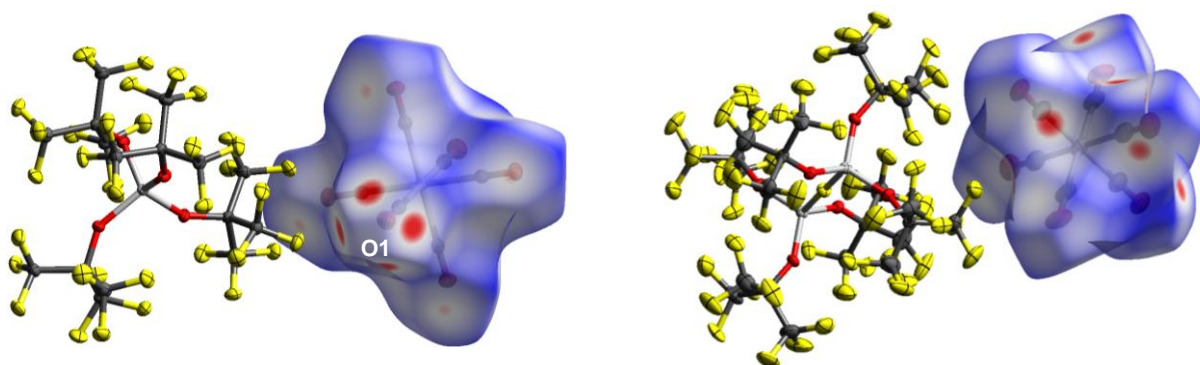

Supplementary Figure 73. Hirshfeld plots of  $[Cr(CO)_6][Al(OR^F)_4]$  (**1**, left) and  $[Cr(CO)_6][F-\{Al(OR^F)_3\}_2]$  (**2**, right). Red faces indicate strong(er) interionic interactions between anion and cation.

Supplementary Figure 74 shows the Hirshfeld plot of the crystal structure of **3** (without a model for the NO-disorder). It can be seen that the interactions between cation and anion is corresponding to the Cr–C1 bond of 195.8 pm bond (other bond lengths: 196.2 (Cr–C2; 4-fold-Symmetry axis), Cr–C3: 192.4 pm), indicating that this is not a favored position for the disordered NO-ligand.

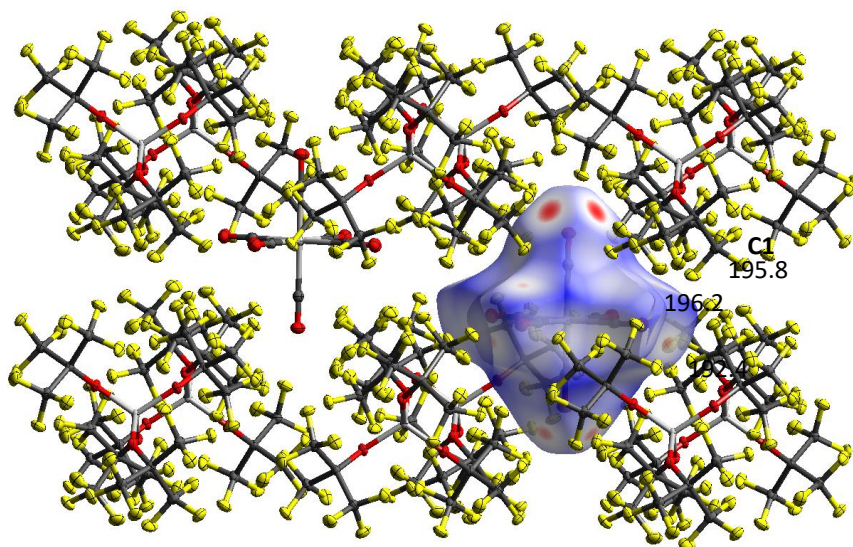

Supplementary Figure 74. Hirshfeld plot of  $[Cr(CO)_5(NO)][Al(OR^F)_4]$  **3** in an enlarged unit cell. Red faces indicate strong(er) interionic interactions between anion and cation. Bond lengths are indicated in pm.

## 16. Solution Thermodynamics Calculations

Thermodynamics in solution were calculated via Born-Fajans-Haber Cycles (Supplementary Figure 75). Gas phase energetics were calculated with a CCSD(T)/def2-TZVPP<sup>28</sup> - MP2/def2-QZVPPD<sup>28</sup> addition scheme based on B3LYP<sup>51,58</sup>-D3<sup>30</sup>(BJ)<sup>29</sup>/def2-TZVPP structures. This compound method approximates CCSD(T)/def2-QZPPD energies by the following formula (Supplementary Equation 2).

$$E_{\text{comp}} = E_{\text{CCSD(T)/def2-TZVPP}} + E_{\text{MP2/def2-QZVPPD}} - E_{\text{MP2/def2-TZVPP}} \approx E_{\text{CCSD(T)/def2-QZVPPD}} \quad (2)$$

Thermal contributions to reaction energies were calculated with BP86<sup>24,25,59</sup>-D3(BJ)/def-TZVP<sup>60</sup>

$$U^\circ = E_{\text{comp.}} + E_{\text{vrt}} \quad (3)$$

(Where  $E_{\text{vrt}}$  = sum of translational, rotational, and vibrational energy incl. zero point vibrational energy @BP86-D3(BJ)/def-TZVP).

$U^\circ$  was then corrected to the standard enthalpy  $H^\circ$  and Gibbs energy  $G^\circ$  by adding  $RT$ ; cf.  $RT = 2.48 \text{ kJ mol}^{-1}$  @ 298.15 K) as well as subtracting thereof  $T \cdot S^\circ$ , and in turn generate  $H^\circ$  and corrected  $G^\circ$  values.

$$H^\circ = U^\circ + RT \quad (4)$$

$G^\circ = H^\circ - T \cdot S^\circ$  ( $T = 298.15 \text{ K}$ ) The RI-C approximation with corresponding auxiliary bases<sup>61</sup> was used to calculate MP2 and CCSD(T) correlation energies, while RI-J auxiliary bases<sup>62-64,65</sup> were used to speed up the DFT calculations. The 3s3p orbitals at Cr were taken into the correlation treatment by setting the frozen core cut off to  $-7.0 \text{ H}$ .

COSMO-RS<sup>66,67</sup> solvation thermodynamics were calculated with COSMOthermX<sup>68,69</sup> (Version C30\_1501) at the BP86-D3/def2-TZVPD//BP86-D3/def-TZVP level.

### Overview (all values $\Delta G^\circ$ in $\text{kJ mol}^{-1}$ )

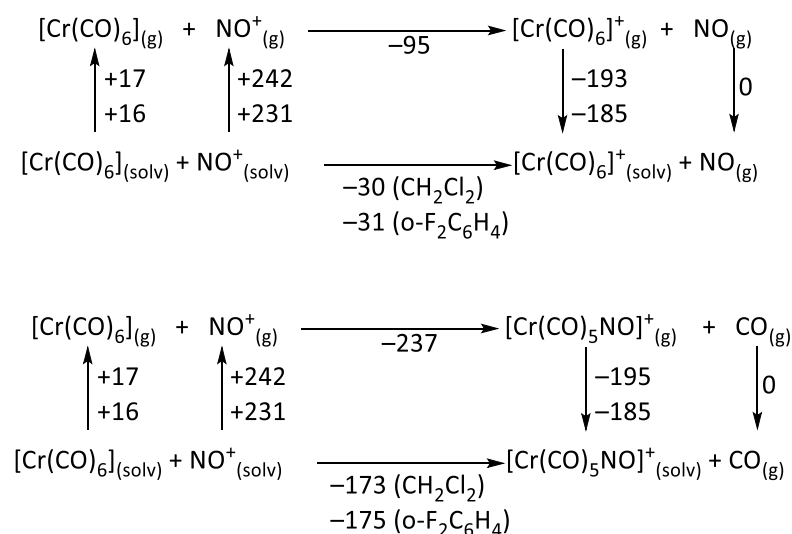

Supplementary Figure 75. Born-Fajans-Haber Cycles for the formations of  $[\text{Cr}(\text{CO})_6]^+$  and  $[\text{Cr}(\text{CO})_5(\text{NO})]^+$ .

## 17. Details on the gas phase energetics and DFT calculations

Details on the energetics and DFT calculations are given in Supplementary Table 10, details on the COSMO-RS calculations are given in Supplementary Table 11.

Supplementary Table 10. Details on the energetics of the DFT calculations.

|                                                     | BP86-D3(bj)/<br>def-TZVP<br>[H] | EVRT (BP86)<br>[kJ mol <sup>-1</sup> ] | S0(BP86)<br>[kJ mol <sup>-1</sup> K <sup>-1</sup> ] | B3LYP/<br>def2-TZVPP<br>[H] | CCSC(T)/<br>def2-TZVPP<br>[H] | MP2/<br>def2-TZVPP<br>[H] | MP2/<br>def2-QZVPPD<br>[H] | Eext<br>[kJ mol <sup>-1</sup> ] | H°(g)<br>[kJ mol <sup>-1</sup> ] | G°(g)<br>[kJ mol <sup>-1</sup> ] | T1diag<br>(CCSD/<br>def2-TZVPP) |
|-----------------------------------------------------|---------------------------------|----------------------------------------|-----------------------------------------------------|-----------------------------|-------------------------------|---------------------------|----------------------------|---------------------------------|----------------------------------|----------------------------------|---------------------------------|
| CO                                                  | -113.360695                     | 18.93                                  | 0.19792                                             | -113.311076                 | -113.158870                   | -113.138493               | -113.1700894               | -113.190466                     | -297160.16                       | -297219.17                       | 0.0184                          |
| NO                                                  | -129.954339                     | 17.44                                  | 0.20557*                                            | -129.891256                 | -129.721155                   | -129.697075               | -129.733416                | -129.757496                     | -340658.39                       | -340719.68                       | 0.0356                          |
| NO <sup>+</sup>                                     | -129.600283                     | 20.37                                  | 0.19847                                             | -129.540134                 | -129.387253                   | -129.373692               | -129.407270                | -129.420830                     | -339771.54                       | -339830.71                       | 0.0167                          |
| Cr(CO) <sub>6</sub>                                 | -1725.129548                    | 167.61                                 | 0.47974                                             | -1724.500893                | -1722.965619                  | -1722.980897              | -1723.241860               | -1723.226582                    | -4524161.30                      | -4524304.34                      | 0.0265                          |
| [Cr(CO) <sub>6</sub> ] <sup>+</sup> D <sub>3d</sub> | -1724.804481                    | 165.67                                 | 0.51271*                                            | -1724.201660                | -1722.664889                  | -1722.558308              | -1722.812970               | -1722.919551                    | -4523357.13                      | -4523510.00                      | 0.0516                          |
| [Cr(CO) <sub>6</sub> ] <sup>+</sup> D <sub>4h</sub> | -1724.801142                    | 168.79                                 | 0.50476*                                            | -1724.199405                | -1722.663242                  | -1722.552409              | -1722.807149               | -1722.917982                    | -4523349.89                      | -4523500.39                      | 0.0528                          |
| [Cr(CO) <sub>5</sub> NO] <sup>+</sup>               | -1741.459256                    | 167.93                                 | 0.49858                                             | -1740.823037                | -1739.283014                  | -1739.300498              | -1739.562220               | -1739.544736                    | -4567004.29                      | -4567152.94                      | 0.0301                          |

\*RT ln2 added to FREEH entropy to account for the electron spin degeneracy

## Details on the COSMO-RS calculations

Supplementary Table 11. Details on the COSMO-RS calculations.

| Compound                                                 | lgP[kPa]  | x°     | p(x°)<br>[bar]          | ΔsolvG°<br>[kJ mol <sup>-1</sup> ] |
|----------------------------------------------------------|-----------|--------|-------------------------|------------------------------------|
| o-DFB in o-DFB                                           | 0.88148   | 1.0000 | 7.612·10 <sup>-2</sup>  | -6.38                              |
| NO <sup>+</sup> in o-DFB                                 | -37.52002 | 0.1010 | 3.050·10 <sup>-41</sup> | -231.27                            |
| Cr(CO) <sub>6</sub> in o-DFB                             | 0.17512   | 0.1010 | 1.512·10 <sup>-3</sup>  | -16.10                             |
| Cr(C <sub>6</sub> H <sub>6</sub> ) <sup>+</sup> in o-DFB | -29.25225 | 0.1010 | 5.650·10 <sup>-33</sup> | -184.07                            |
| Cr(CO) <sub>5</sub> NO <sup>+</sup> in o-DFB             | -29.37021 | 0.1010 | 4.306·10 <sup>-33</sup> | -184.75                            |
| DCM in DCM                                               | 1.82198   | 1.0000 | 6.637·10 <sup>-1</sup>  | -1.02                              |
| NO <sup>+</sup> in DCM                                   | -39.16843 | 0.0639 | 4.333·10 <sup>-43</sup> | -241.81                            |
| Cr(CO) <sub>6</sub> in DCM                               | 0.30644   | 0.0639 | 1.293·10 <sup>-03</sup> | -16.49                             |
| Cr(CO) <sub>6</sub> <sup>+</sup> in DCM                  | -30.64946 | 0.0639 | 1.431·10 <sup>-34</sup> | -193.18                            |
| Cr(CO) <sub>5</sub> NO <sup>+</sup> in DCM               | -30.90082 | 0.0639 | 8.024·10 <sup>-35</sup> | -194.62                            |

## 18. Additional information on the DFT calculations

Supplementary Figure 76 shows the calculated structure of  $[\text{Cr}(\text{CO})_6]^+$  (@BP86-D3BJ/def2-TZVPP,  $D_{3d}$  Symmetry), Supplementary Data 8 gives full information on the atomic coordinates and the calculated spectra.

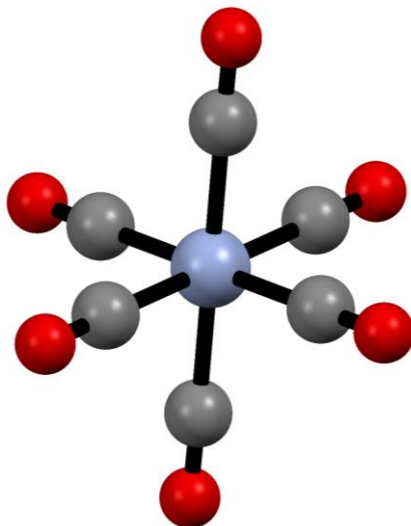

Supplementary Figure 76. Optimized calculated structure of  $[\text{Cr}(\text{CO})_6]^+$ .

### Coordinates and vibrational spectrum

Supplementary Data 8. Information on the atomic coordinates and vibrational spectra of  $[\text{Cr}(\text{CO})_6]^+$ .

#### \$coord

|                    |                    |                    |    |
|--------------------|--------------------|--------------------|----|
| 0.0000000000000000 | 0.0000000000000000 | 0.0000000000000000 | cr |
| 2.70377210067779   | 1.56102355015373   | -1.98661068300968  | c  |
| 4.29003072522233   | 2.47685039403888   | -3.11633557947232  | o  |
| 2.70377210067779   | -1.56102355015373  | 1.98661068300968   | c  |
| 4.29003072522233   | -2.47685039403888  | 3.11633557947232   | o  |
| -2.70377210067779  | -1.56102355015373  | 1.98661068300968   | c  |
| -4.29003072522233  | -2.47685039403887  | 3.11633557947232   | o  |
| -2.70377210067779  | 1.56102355015373   | -1.98661068300968  | c  |
| -4.29003072522233  | 2.47685039403887   | -3.11633557947232  | o  |
| 0.0000000000000000 | 3.12204710030743   | 1.98661068300968   | c  |
| 0.0000000000000000 | 4.95370078807776   | 3.11633557947232   | o  |
| 0.0000000000000000 | -3.12204710030743  | -1.98661068300968  | c  |
| 0.0000000000000000 | -4.95370078807776  | -3.11633557947232  | o  |

#### \$vibrational spectrum

| #  | mode | symmetry | wave number<br>cm** (-1) | IR intensity<br>km/mol | selection rules<br>IR | RAMAN |
|----|------|----------|--------------------------|------------------------|-----------------------|-------|
| 1  |      |          | -0.00                    | 0.00000                | -                     | -     |
| 2  |      |          | -0.00                    | 0.00000                | -                     | -     |
| 3  |      |          | -0.00                    | 0.00000                | -                     | -     |
| 4  |      |          | 0.00                     | 0.00000                | -                     | -     |
| 5  |      |          | 0.00                     | 0.00000                | -                     | -     |
| 6  |      |          | 0.00                     | 0.00000                | -                     | -     |
| 7  |      | eu       | 56.17                    | 0.48754                | YES                   | NO    |
| 8  |      | eu       | 56.17                    | 0.48754                | YES                   | NO    |
| 9  |      | a1u      | 71.46                    | 0.00000                | NO                    | NO    |
| 10 |      | a1g      | 81.72                    | 0.00000                | NO                    | YES   |
| 11 |      | eg       | 83.02                    | 0.00000                | NO                    | YES   |
| 12 |      | eg       | 83.02                    | 0.00000                | NO                    | YES   |
| 13 |      | a2u      | 85.86                    | 0.99846                | YES                   | NO    |
| 14 |      | eu       | 97.42                    | 1.72444                | YES                   | NO    |
| 15 |      | eu       | 97.42                    | 1.72444                | YES                   | NO    |
| 16 |      | eg       | 327.40                   | 0.00000                | NO                    | YES   |

|    |     |         |           |     |     |
|----|-----|---------|-----------|-----|-----|
| 17 | eg  | 327.40  | 0.00000   | NO  | YES |
| 18 | eg  | 336.79  | 0.00000   | NO  | YES |
| 19 | eg  | 336.79  | 0.00000   | NO  | YES |
| 20 | a2g | 342.08  | 0.00000   | NO  | NO  |
| 21 | alg | 363.50  | 0.00000   | NO  | YES |
| 22 | a2u | 390.93  | 5.80762   | YES | NO  |
| 23 | eu  | 392.17  | 15.72340  | YES | NO  |
| 24 | eu  | 392.17  | 15.72340  | YES | NO  |
| 25 | eu  | 451.05  | 1.11300   | YES | NO  |
| 26 | eu  | 451.05  | 1.11300   | YES | NO  |
| 27 | alg | 459.87  | 0.00000   | NO  | YES |
| 28 | eg  | 483.72  | 0.00000   | NO  | YES |
| 29 | eg  | 483.72  | 0.00000   | NO  | YES |
| 30 | alu | 509.43  | 0.00000   | NO  | NO  |
| 31 | a2u | 531.29  | 82.99160  | YES | NO  |
| 32 | eu  | 624.15  | 119.64769 | YES | NO  |
| 33 | eu  | 624.15  | 119.64769 | YES | NO  |
| 34 | eg  | 2073.61 | 0.00000   | NO  | YES |
| 35 | eg  | 2073.61 | 0.00000   | NO  | YES |
| 36 | eu  | 2080.43 | 975.48463 | YES | NO  |
| 37 | eu  | 2080.43 | 975.48463 | YES | NO  |
| 38 | a2u | 2083.38 | 786.33708 | YES | NO  |
| 39 | alg | 2158.03 | 0.00000   | NO  | YES |

### \$raman spectrum

| #  | mode | symmetry | wave number | selection rule | derivative of isotropic polarizability a.u. | derivative of polarizability anisotropy a.u. | raman scattering cross sections bohr**2/sr |
|----|------|----------|-------------|----------------|---------------------------------------------|----------------------------------------------|--------------------------------------------|
| #  |      |          | cm**(-1)    |                |                                             |                                              | T, T<br>II, II                             |
| 1  |      |          | 0.00        | -              | 0.000000                                    | 0.000000                                     | 0.00000D+00 0.00000D+00                    |
| 2  |      |          | 0.00        | -              | 0.000000                                    | 0.000000                                     | 0.00000D+00 0.00000D+00                    |
| 3  |      |          | 0.00        | -              | 0.000000                                    | 0.000000                                     | 0.00000D+00 0.00000D+00                    |
| 4  |      |          | 0.00        | -              | 0.000000                                    | 0.000000                                     | 0.00000D+00 0.00000D+00                    |
| 5  |      |          | 0.00        | -              | 0.000000                                    | 0.000000                                     | 0.00000D+00 0.00000D+00                    |
| 6  |      |          | 0.00        | -              | 0.000000                                    | 0.000000                                     | 0.00000D+00 0.00000D+00                    |
| 7  | eu   |          | 56.17       | NO             | 0.000000                                    | 0.000000                                     | 0.00000D+00 0.00000D+00                    |
| 8  | eu   |          | 56.17       | NO             | 0.000000                                    | 0.000000                                     | 0.00000D+00 0.00000D+00                    |
| 9  | alu  |          | 71.46       | NO             | 0.000000                                    | 0.000000                                     | 0.00000D+00 0.00000D+00                    |
| 10 | alg  |          | 81.72       | YES            | 0.000484                                    | 0.089709                                     | 0.27152D-13 0.20358D-13                    |
| 11 | eg   |          | 83.02       | YES            | 0.000000                                    | 0.097543                                     | 0.31168D-13 0.23376D-13                    |
| 12 | eg   |          | 83.02       | YES            | 0.000000                                    | 0.097543                                     | 0.31168D-13 0.23376D-13                    |
| 13 | a2u  |          | 85.86       | NO             | 0.000000                                    | 0.000000                                     | 0.00000D+00 0.00000D+00                    |
| 14 | eu   |          | 97.42       | NO             | 0.000000                                    | 0.000000                                     | 0.00000D+00 0.00000D+00                    |
| 15 | eu   |          | 97.42       | NO             | 0.000000                                    | 0.000000                                     | 0.00000D+00 0.00000D+00                    |
| 16 | eg   |          | 327.40      | YES            | 0.000000                                    | 0.007290                                     | 0.16502D-16 0.12376D-16                    |
| 17 | eg   |          | 327.40      | YES            | 0.000000                                    | 0.007290                                     | 0.16502D-16 0.12376D-16                    |
| 18 | eg   |          | 336.79      | YES            | 0.000000                                    | 0.017925                                     | 0.95487D-16 0.71615D-16                    |
| 19 | eg   |          | 336.79      | YES            | 0.000000                                    | 0.017925                                     | 0.95487D-16 0.71615D-16                    |
| 20 | a2g  |          | 342.08      | NO             | 0.000000                                    | 0.000000                                     | 0.93991D-33 0.70493D-33                    |
| 21 | alg  |          | 363.50      | YES            | 0.067516                                    | 0.015615                                     | 0.13617D-13 0.48331D-16                    |
| 22 | a2u  |          | 390.93      | NO             | 0.000000                                    | 0.000000                                     | 0.00000D+00 0.00000D+00                    |
| 23 | eu   |          | 392.17      | NO             | 0.000000                                    | 0.000000                                     | 0.00000D+00 0.00000D+00                    |
| 24 | eu   |          | 392.17      | NO             | 0.000000                                    | 0.000000                                     | 0.00000D+00 0.00000D+00                    |
| 25 | eu   |          | 451.05      | NO             | 0.000000                                    | 0.000000                                     | 0.00000D+00 0.00000D+00                    |
| 26 | eu   |          | 451.05      | NO             | 0.000000                                    | 0.000000                                     | 0.00000D+00 0.00000D+00                    |
| 27 | alg  |          | 459.87      | YES            | -0.006331                                   | 0.010234                                     | 0.10317D-15 0.14586D-16                    |
| 28 | eg   |          | 483.72      | YES            | -0.000000                                   | 0.026452                                     | 0.12060D-15 0.90450D-16                    |
| 29 | eg   |          | 483.72      | YES            | 0.000000                                    | 0.026452                                     | 0.12060D-15 0.90450D-16                    |
| 30 | alu  |          | 509.43      | NO             | 0.000000                                    | 0.000000                                     | 0.00000D+00 0.00000D+00                    |
| 31 | a2u  |          | 531.29      | NO             | 0.000000                                    | 0.000000                                     | 0.00000D+00 0.00000D+00                    |
| 32 | eu   |          | 624.15      | NO             | 0.000000                                    | 0.000000                                     | 0.00000D+00 0.00000D+00                    |
| 33 | eu   |          | 624.15      | NO             | 0.000000                                    | 0.000000                                     | 0.00000D+00 0.00000D+00                    |
| 34 | eg   |          | 2073.61     | YES            | 0.000000                                    | 0.647459                                     | 0.69382D-14 0.52036D-14                    |
| 35 | eg   |          | 2073.61     | YES            | 0.000000                                    | 0.647459                                     | 0.69382D-14 0.52036D-14                    |
| 36 | eu   |          | 2080.43     | NO             | 0.000000                                    | 0.000000                                     | 0.00000D+00 0.00000D+00                    |
| 37 | eu   |          | 2080.43     | NO             | 0.000000                                    | 0.000000                                     | 0.00000D+00 0.00000D+00                    |
| 38 | a2u  |          | 2083.38     | NO             | 0.000000                                    | 0.000000                                     | 0.00000D+00 0.00000D+00                    |
| 39 | alg  |          | 2158.03     | YES            | 0.185543                                    | 0.033106                                     | 0.58968D-14 0.12480D-16                    |

Supplementary Figure 77 shows the calculated structure of  $[\text{Cr}(\text{CO})_5(\text{NO})]^+$  (@BP86-D3BJ/def2-TZVPP,  $C_{4v}$  Symmetry), Supplementary Data 9 gives full information on the atomic coordinates and the calculated spectra.

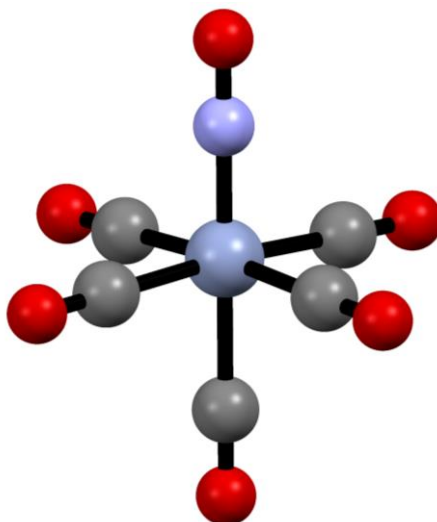

Supplementary Figure 77. Optimized calculated structure of  $[\text{Cr}(\text{CO})_5(\text{NO})]^+$ .

## Coordinates and vibrational spectrum

Supplementary Data 9. Information on the atomic coordinates and vibrational spectra of  $[\text{Cr}(\text{CO})_5(\text{NO})]^+$ .

```

$coord
0.0000000000000000    -0.0000000000000000    0.20282980067283    cr
0.0000000000000000    0.0000000000000000    3.49466707406178    n
0.0000000000000000    0.0000000000000000    -3.56906595476235    c
0.0000000000000000    3.67489222252525    0.04366159906058    c
0.0000000000000000    -3.67489222252525    0.04366159906058    c
-3.67489222252525    0.0000000000000000    0.04366159906058    c
3.67489222252525    0.0000000000000000    0.04366159906058    c
0.0000000000000000    0.0000000000000000    5.65792323415895    o
-5.82666319957331    -0.0000000000000000    -0.02605702713823    o
0.0000000000000000    5.82666319957331    -0.02605702713823    o
-0.0000000000000000    -5.82666319957331    -0.02605702713823    o
0.0000000000000000    0.0000000000000000    -5.71360688969806    o
5.82666319957331    -0.0000000000000000    -0.02605702713823    o
  
```

```

$vibrational spectrum
# mode      symmetry      wave number      IR intensity      selection rules
#           #           cm** (-1)        km/mol           IR      RAMAN
1           1           -0.00            0.00000          -      -
2           2           0.00             0.00000          -      -
3           3           0.00             0.00000          -      -
4           4           0.00             0.00000          -      -
5           5           0.00             0.00000          -      -
6           6           0.00             0.00000          -      -
7           e           58.57            0.00136          YES     YES
8           e           58.57            0.00136          YES     YES
9           b1          69.45            0.00000          NO      YES
10          b2          87.09            0.00000          NO      YES
11          e           90.05            0.09603          YES     YES
12          e           90.05            0.09603          YES     YES
13          e           100.33           1.03821          YES     YES
14          e           100.33           1.03821          YES     YES
15          a1          101.15           2.22404          YES     YES
16          e           339.48           0.09897          YES     YES
17          e           339.48           0.09897          YES     YES
18          a2          346.10           0.00000          NO      NO
19          a1          353.98           10.43425         YES     YES
20          b1          369.48           0.00000          NO      YES
21          a1          372.81           0.34551          YES     YES
  
```

|    |    |         |            |     |     |
|----|----|---------|------------|-----|-----|
| 22 | e  | 418.09  | 23.07694   | YES | YES |
| 23 | e  | 418.09  | 23.07694   | YES | YES |
| 24 | e  | 471.87  | 0.14618    | YES | YES |
| 25 | e  | 471.87  | 0.14618    | YES | YES |
| 26 | b1 | 477.89  | 0.00000    | NO  | YES |
| 27 | b2 | 504.72  | 0.00000    | NO  | YES |
| 28 | a1 | 505.67  | 2.58879    | YES | YES |
| 29 | e  | 534.68  | 25.72743   | YES | YES |
| 30 | e  | 534.68  | 25.72743   | YES | YES |
| 31 | a1 | 666.84  | 128.55458  | YES | YES |
| 32 | e  | 696.49  | 91.76903   | YES | YES |
| 33 | e  | 696.49  | 91.76903   | YES | YES |
| 34 | a1 | 1902.64 | 1039.11465 | YES | YES |
| 35 | e  | 2084.71 | 1027.37403 | YES | YES |
| 36 | e  | 2084.71 | 1027.37403 | YES | YES |
| 37 | b1 | 2097.73 | 0.00000    | NO  | YES |
| 38 | a1 | 2123.66 | 218.20731  | YES | YES |
| 39 | a1 | 2162.05 | 86.63598   | YES | YES |

**\$raman spectrum**

| #  | mode | symmetry | wave number | selection rule | derivative of isotropic polarizability a.u. | derivative of polarizability anisotropy a.u. | raman scattering cross sections bohr**2/sr | T, T        | II, II |
|----|------|----------|-------------|----------------|---------------------------------------------|----------------------------------------------|--------------------------------------------|-------------|--------|
| #  |      |          | cm**(-1)    |                |                                             |                                              |                                            |             |        |
| #  |      |          |             |                |                                             |                                              |                                            |             |        |
| #  |      |          |             |                |                                             |                                              |                                            |             |        |
| #  |      |          |             |                |                                             |                                              |                                            |             |        |
| 1  |      |          | 0.00        | -              | 0.000000                                    | 0.000000                                     | 0.00000D+00                                | 0.00000D+00 |        |
| 2  |      |          | 0.00        | -              | 0.000000                                    | 0.000000                                     | 0.00000D+00                                | 0.00000D+00 |        |
| 3  |      |          | 0.00        | -              | 0.000000                                    | 0.000000                                     | 0.00000D+00                                | 0.00000D+00 |        |
| 4  |      |          | 0.00        | -              | 0.000000                                    | 0.000000                                     | 0.00000D+00                                | 0.00000D+00 |        |
| 5  |      |          | 0.00        | -              | 0.000000                                    | 0.000000                                     | 0.00000D+00                                | 0.00000D+00 |        |
| 6  |      |          | 0.00        | -              | 0.000000                                    | 0.000000                                     | 0.00000D+00                                | 0.00000D+00 |        |
| 7  | e    |          | 58.57       | YES            | 0.000000                                    | 0.001355                                     | 0.11556D-16                                | 0.86672D-17 |        |
| 8  | e    |          | 58.57       | YES            | 0.000000                                    | 0.001355                                     | 0.11556D-16                                | 0.86672D-17 |        |
| 9  | b1   |          | 69.45       | YES            | 0.000000                                    | 0.005316                                     | 0.12903D-15                                | 0.96771D-16 |        |
| 10 | b2   |          | 87.09       | YES            | 0.000000                                    | 0.097362                                     | 0.28428D-13                                | 0.21321D-13 |        |
| 11 | e    |          | 90.05       | YES            | 0.000000                                    | 0.094990                                     | 0.25446D-13                                | 0.19084D-13 |        |
| 12 | e    |          | 90.05       | YES            | 0.000000                                    | 0.094990                                     | 0.25446D-13                                | 0.19084D-13 |        |
| 13 | e    |          | 100.33      | YES            | 0.000000                                    | 0.040387                                     | 0.37746D-14                                | 0.28310D-14 |        |
| 14 | e    |          | 100.33      | YES            | 0.000000                                    | 0.040387                                     | 0.37746D-14                                | 0.28310D-14 |        |
| 15 | a1   |          | 101.15      | YES            | -0.001832                                   | 0.016246                                     | 0.68789D-15                                | 0.45136D-15 |        |
| 16 | e    |          | 339.48      | YES            | 0.000000                                    | 0.002243                                     | 0.14774D-17                                | 0.11081D-17 |        |
| 17 | e    |          | 339.48      | YES            | 0.000000                                    | 0.002243                                     | 0.14774D-17                                | 0.11081D-17 |        |
| 18 | a2   |          | 346.10      | NO             | 0.000000                                    | 0.000000                                     | 0.00000D+00                                | 0.00000D+00 |        |
| 19 | a1   |          | 353.98      | YES            | -0.019387                                   | 0.020927                                     | 0.12843D-14                                | 0.90407D-16 |        |
| 20 | b1   |          | 369.48      | YES            | 0.000000                                    | 0.044185                                     | 0.50325D-15                                | 0.37744D-15 |        |
| 21 | a1   |          | 372.81      | YES            | -0.057923                                   | 0.040255                                     | 0.10010D-13                                | 0.30903D-15 |        |
| 22 | e    |          | 418.09      | YES            | 0.000000                                    | 0.014174                                     | 0.42973D-16                                | 0.32230D-16 |        |
| 23 | e    |          | 418.09      | YES            | 0.000000                                    | 0.014174                                     | 0.42973D-16                                | 0.32230D-16 |        |
| 24 | e    |          | 471.87      | YES            | 0.000000                                    | 0.003611                                     | 0.23311D-17                                | 0.17483D-17 |        |
| 25 | e    |          | 471.87      | YES            | 0.000000                                    | 0.003611                                     | 0.23311D-17                                | 0.17483D-17 |        |
| 26 | b1   |          | 477.89      | YES            | 0.000000                                    | 0.001595                                     | 0.44624D-18                                | 0.33468D-18 |        |
| 27 | b2   |          | 504.72      | YES            | 0.000000                                    | 0.007279                                     | 0.85822D-17                                | 0.64366D-17 |        |
| 28 | a1   |          | 505.67      | YES            | -0.043698                                   | 0.073286                                     | 0.43371D-14                                | 0.65061D-15 |        |
| 29 | e    |          | 534.68      | YES            | 0.000000                                    | 0.001108                                     | 0.18282D-18                                | 0.13711D-18 |        |
| 30 | e    |          | 534.68      | YES            | 0.000000                                    | 0.001108                                     | 0.18282D-18                                | 0.13711D-18 |        |
| 31 | a1   |          | 666.84      | YES            | -0.041065                                   | 0.103367                                     | 0.32103D-14                                | 0.86748D-15 |        |
| 32 | e    |          | 696.49      | YES            | 0.000000                                    | 0.018140                                     | 0.33459D-16                                | 0.25094D-16 |        |
| 33 | e    |          | 696.49      | YES            | 0.000000                                    | 0.018140                                     | 0.33459D-16                                | 0.25094D-16 |        |
| 34 | a1   |          | 1902.64     | YES            | 0.037570                                    | 0.175169                                     | 0.92119D-15                                | 0.45527D-15 |        |
| 35 | e    |          | 2084.71     | YES            | 0.000000                                    | 0.069320                                     | 0.78629D-16                                | 0.58972D-16 |        |
| 36 | e    |          | 2084.71     | YES            | 0.000000                                    | 0.069320                                     | 0.78629D-16                                | 0.58972D-16 |        |
| 37 | b1   |          | 2097.73     | YES            | 0.000000                                    | 0.589111                                     | 0.56035D-14                                | 0.42026D-14 |        |
| 38 | a1   |          | 2123.66     | YES            | 0.001080                                    | 0.474507                                     | 0.35405D-14                                | 0.26552D-14 |        |
| 39 | a1   |          | 2162.05     | YES            | 0.171112                                    | 0.000886                                     | 0.49807D-14                                | 0.88931D-20 |        |

## Gaussian Calculations

Supplementary Data 10 gives full information on the Gaussian calculations of  $[\text{Cr}(\text{CO})_6]^+$ .

*Supplementary Data 10.* Information on the atomic coordinates and vibrational spectra of  $[\text{Cr}(\text{CO})_6]^+$ .

Harmonic frequencies ( $\text{cm}^{-1}$ ), IR intensities (KM/Mole), Raman scattering activities ( $\text{A}^4/\text{AMU}$ ), depolarization ratios for plane and unpolarized incident light, reduced masses (AMU), force constants (mDyne/A), and normal coordinates:

|             |    | 1       |       |       | 2        |       |       | 3        |       |       |
|-------------|----|---------|-------|-------|----------|-------|-------|----------|-------|-------|
|             |    | EU      |       |       | EU       |       |       | A1U      |       |       |
| Frequencies | -- | 59.1444 |       |       | 59.1444  |       |       | 73.6203  |       |       |
| Red. masses | -- | 15.2953 |       |       | 15.2953  |       |       | 15.4222  |       |       |
| Frc consts  | -- | 0.0315  |       |       | 0.0315   |       |       | 0.0492   |       |       |
| IR Inten    | -- | 0.4145  |       |       | 0.4145   |       |       | 0.0000   |       |       |
| Raman Activ | -- | 0.0000  |       |       | 0.0000   |       |       | 0.0000   |       |       |
| Depolar (P) | -- | 0.0000  |       |       | 0.0000   |       |       | 0.0000   |       |       |
| Depolar (U) | -- | 0.0000  |       |       | 0.0000   |       |       | 0.0000   |       |       |
| Atom AN     |    | X       | Y     | Z     | X        | Y     | Z     | X        | Y     | Z     |
| 1           | 24 | 0.00    | 0.00  | 0.00  | 0.00     | 0.00  | 0.00  | 0.00     | 0.00  | 0.00  |
| 2           | 6  | -0.11   | 0.00  | 0.00  | 0.00     | -0.11 | 0.19  | 0.15     | 0.00  | 0.00  |
| 3           | 8  | -0.24   | 0.00  | 0.00  | 0.00     | -0.24 | 0.40  | 0.38     | 0.00  | 0.00  |
| 4           | 6  | -0.11   | 0.00  | 0.00  | 0.00     | -0.11 | 0.19  | 0.15     | 0.00  | 0.00  |
| 5           | 8  | -0.24   | 0.00  | 0.00  | 0.00     | -0.24 | 0.40  | 0.38     | 0.00  | 0.00  |
| 6           | 6  | 0.05    | 0.09  | 0.16  | -0.09    | 0.05  | -0.09 | -0.08    | 0.13  | 0.00  |
| 7           | 8  | 0.12    | 0.21  | 0.35  | -0.21    | 0.12  | -0.20 | -0.19    | 0.33  | 0.00  |
| 8           | 6  | 0.05    | 0.09  | 0.16  | -0.09    | 0.05  | -0.09 | -0.08    | 0.13  | 0.00  |
| 9           | 8  | 0.12    | 0.21  | 0.35  | -0.21    | 0.12  | -0.20 | -0.19    | 0.33  | 0.00  |
| 10          | 6  | 0.05    | -0.09 | -0.16 | 0.09     | 0.05  | -0.09 | -0.08    | -0.13 | 0.00  |
| 11          | 8  | 0.12    | -0.21 | -0.35 | 0.21     | 0.12  | -0.20 | -0.19    | -0.33 | 0.00  |
| 12          | 6  | 0.05    | -0.09 | -0.16 | 0.09     | 0.05  | -0.09 | -0.08    | -0.13 | 0.00  |
| 13          | 8  | 0.12    | -0.21 | -0.35 | 0.21     | 0.12  | -0.20 | -0.19    | -0.33 | 0.00  |
|             |    | 4       |       |       | 5        |       |       | 6        |       |       |
|             |    | A1G     |       |       | EG       |       |       | EG       |       |       |
| Frequencies | -- | 84.0735 |       |       | 85.4517  |       |       | 85.4517  |       |       |
| Red. masses | -- | 15.5007 |       |       | 15.4985  |       |       | 15.4985  |       |       |
| Frc consts  | -- | 0.0646  |       |       | 0.0667   |       |       | 0.0667   |       |       |
| IR Inten    | -- | 0.0000  |       |       | 0.0000   |       |       | 0.0000   |       |       |
| Raman Activ | -- | 8.5938  |       |       | 10.0021  |       |       | 10.0021  |       |       |
| Depolar (P) | -- | 0.7499  |       |       | 0.7500   |       |       | 0.7500   |       |       |
| Depolar (U) | -- | 0.8571  |       |       | 0.8571   |       |       | 0.8571   |       |       |
| Atom AN     |    | X       | Y     | Z     | X        | Y     | Z     | X        | Y     | Z     |
| 1           | 24 | 0.00    | 0.00  | 0.00  | 0.00     | 0.00  | 0.00  | 0.00     | 0.00  | 0.00  |
| 2           | 6  | 0.00    | 0.08  | -0.12 | -0.15    | -0.02 | 0.05  | -0.10    | 0.03  | -0.07 |
| 3           | 8  | 0.00    | 0.20  | -0.32 | -0.39    | -0.07 | 0.13  | -0.27    | 0.10  | -0.18 |
| 4           | 6  | 0.00    | -0.08 | 0.12  | 0.15     | 0.02  | -0.05 | 0.10     | -0.03 | 0.07  |
| 5           | 8  | 0.00    | -0.20 | 0.32  | 0.39     | 0.07  | -0.13 | 0.27     | -0.10 | 0.18  |
| 6           | 6  | -0.07   | -0.04 | -0.12 | -0.07    | 0.15  | 0.04  | 0.07     | -0.05 | 0.08  |
| 7           | 8  | -0.18   | -0.10 | -0.32 | -0.17    | 0.40  | 0.09  | 0.20     | -0.12 | 0.20  |
| 8           | 6  | 0.07    | 0.04  | 0.12  | 0.07     | -0.15 | -0.04 | -0.07    | 0.05  | -0.08 |
| 9           | 8  | 0.18    | 0.10  | 0.32  | 0.17     | -0.40 | -0.09 | -0.20    | 0.12  | -0.20 |
| 10          | 6  | 0.07    | -0.04 | -0.12 | 0.04     | -0.01 | -0.09 | -0.09    | -0.16 | -0.01 |
| 11          | 8  | 0.18    | -0.10 | -0.32 | 0.13     | -0.03 | -0.22 | -0.23    | -0.42 | -0.02 |
| 12          | 6  | -0.07   | 0.04  | 0.12  | -0.04    | 0.01  | 0.09  | 0.09     | 0.16  | 0.01  |
| 13          | 8  | -0.18   | 0.10  | 0.32  | -0.13    | 0.03  | 0.22  | 0.23     | 0.42  | 0.02  |
|             |    | 7       |       |       | 8        |       |       | 9        |       |       |
|             |    | A2U     |       |       | EU       |       |       | EU       |       |       |
| Frequencies | -- | 90.7141 |       |       | 102.6922 |       |       | 102.6933 |       |       |
| Red. masses | -- | 17.8330 |       |       | 17.1262  |       |       | 17.1262  |       |       |
| Frc consts  | -- | 0.0865  |       |       | 0.1064   |       |       | 0.1064   |       |       |
| IR Inten    | -- | 0.8081  |       |       | 1.4800   |       |       | 1.4800   |       |       |
| Raman Activ | -- | 0.0000  |       |       | 0.0000   |       |       | 0.0000   |       |       |
| Depolar (P) | -- | 0.0000  |       |       | 0.0000   |       |       | 0.0000   |       |       |
| Depolar (U) | -- | 0.0000  |       |       | 0.0000   |       |       | 0.0000   |       |       |
| Atom AN     |    | X       | Y     | Z     | X        | Y     | Z     | X        | Y     | Z     |
| 1           | 24 | 0.00    | 0.00  | 0.26  | 0.22     | 0.00  | 0.00  | 0.00     | 0.22  | 0.00  |
| 2           | 6  | 0.00    | 0.14  | 0.07  | -0.02    | 0.00  | 0.00  | 0.00     | 0.18  | 0.12  |
| 3           | 8  | 0.00    | 0.30  | -0.20 | -0.43    | 0.00  | 0.00  | 0.00     | 0.07  | 0.29  |
| 4           | 6  | 0.00    | 0.14  | 0.07  | -0.02    | 0.00  | 0.00  | 0.00     | 0.18  | 0.12  |
| 5           | 8  | 0.00    | 0.30  | -0.20 | -0.43    | 0.00  | 0.00  | 0.00     | 0.07  | 0.29  |
| 6           | 6  | -0.12   | -0.07 | 0.07  | 0.13     | 0.08  | -0.11 | 0.08     | 0.03  | -0.06 |
| 7           | 8  | -0.26   | -0.15 | -0.20 | -0.05    | 0.22  | -0.25 | 0.22     | -0.30 | -0.14 |
| 8           | 6  | -0.12   | -0.07 | 0.07  | 0.13     | 0.08  | -0.11 | 0.08     | 0.03  | -0.06 |
| 9           | 8  | -0.26   | -0.15 | -0.20 | -0.05    | 0.22  | -0.25 | 0.22     | -0.30 | -0.14 |
| 10          | 6  | 0.12    | -0.07 | 0.07  | 0.13     | -0.08 | 0.11  | -0.08    | 0.03  | -0.06 |
| 11          | 8  | 0.26    | -0.15 | -0.20 | -0.05    | -0.22 | 0.25  | -0.22    | -0.30 | -0.14 |



|             |    |          |       |       |          |       |       |          |       |       |
|-------------|----|----------|-------|-------|----------|-------|-------|----------|-------|-------|
| 12          | 6  | 0.12     | -0.07 | 0.07  | 0.13     | -0.08 | 0.11  | -0.08    | 0.03  | -0.06 |
| 13          | 8  | 0.26     | -0.15 | -0.20 | -0.05    | -0.22 | 0.25  | -0.22    | -0.30 | -0.14 |
|             |    | 10       |       |       |          | 11    |       |          | 12    |       |
|             |    | EG       |       |       |          | EG    |       |          | EG    |       |
| Frequencies | -- | 323.5861 |       |       | 323.5861 |       |       | 331.5603 |       |       |
| Red. masses | -- | 12.9494  |       |       | 12.9494  |       |       | 13.7648  |       |       |
| Frc consts  | -- | 0.7989   |       |       | 0.7989   |       |       | 0.8915   |       |       |
| IR Inten    | -- | 0.0000   |       |       | 0.0000   |       |       | 0.0000   |       |       |
| Raman Activ | -- | 0.0268   |       |       | 0.0268   |       |       | 0.1953   |       |       |
| Depolar (P) | -- | 0.7500   |       |       | 0.7500   |       |       | 0.7500   |       |       |
| Depolar (U) | -- | 0.8571   |       |       | 0.8571   |       |       | 0.8571   |       |       |
| Atom AN     |    | X        | Y     | Z     | X        | Y     | Z     | X        | Y     | Z     |
| 1           | 24 | 0.00     | 0.00  | 0.00  | 0.00     | 0.00  | 0.00  | 0.00     | 0.00  | 0.00  |
| 2           | 6  | 0.19     | 0.01  | -0.04 | 0.02     | -0.09 | 0.46  | 0.14     | -0.04 | 0.00  |
| 3           | 8  | -0.09    | -0.02 | 0.01  | -0.01    | 0.25  | -0.08 | -0.08    | -0.03 | -0.03 |
| 4           | 6  | -0.19    | -0.01 | 0.04  | -0.02    | 0.09  | -0.46 | -0.14    | 0.04  | 0.00  |
| 5           | 8  | 0.09     | 0.02  | -0.01 | 0.01     | -0.25 | 0.08  | 0.08     | 0.03  | 0.03  |
| 6           | 6  | 0.11     | -0.03 | 0.42  | 0.05     | -0.17 | -0.19 | 0.33     | 0.09  | -0.02 |
| 7           | 8  | -0.22    | -0.08 | -0.08 | 0.05     | 0.12  | 0.03  | 0.16     | 0.14  | -0.22 |
| 8           | 6  | -0.11    | 0.03  | -0.42 | -0.05    | 0.17  | 0.19  | -0.33    | -0.09 | 0.02  |
| 9           | 8  | 0.22     | 0.08  | 0.08  | -0.05    | -0.12 | -0.03 | -0.16    | -0.14 | 0.22  |
| 10          | 6  | 0.12     | 0.06  | -0.37 | -0.03    | -0.16 | -0.27 | 0.35     | -0.14 | 0.02  |
| 11          | 8  | -0.20    | 0.06  | 0.07  | -0.09    | 0.14  | 0.05  | 0.19     | -0.15 | 0.25  |
| 12          | 6  | -0.12    | -0.06 | 0.37  | 0.03     | 0.16  | 0.27  | -0.35    | 0.14  | -0.02 |
| 13          | 8  | 0.20     | -0.06 | -0.07 | 0.09     | -0.14 | -0.05 | -0.19    | 0.15  | -0.25 |
|             |    | 13       |       |       |          | 14    |       |          | 15    |       |
|             |    | EG       |       |       |          | A2G   |       |          | A1G   |       |
| Frequencies | -- | 331.5603 |       |       | 338.3605 |       |       | 356.7004 |       |       |
| Red. masses | -- | 13.7648  |       |       | 12.7318  |       |       | 14.0974  |       |       |
| Frc consts  | -- | 0.8915   |       |       | 0.8588   |       |       | 1.0568   |       |       |
| IR Inten    | -- | 0.0000   |       |       | 0.0000   |       |       | 0.0000   |       |       |
| Raman Activ | -- | 0.1960   |       |       | 0.0000   |       |       | 24.8498  |       |       |
| Depolar (P) | -- | 0.7500   |       |       | 0.7500   |       |       | 0.0030   |       |       |
| Depolar (U) | -- | 0.8571   |       |       | 0.8571   |       |       | 0.0060   |       |       |
| Atom AN     |    | X        | Y     | Z     | X        | Y     | Z     | X        | Y     | Z     |
| 1           | 24 | 0.00     | 0.00  | 0.00  | 0.00     | 0.00  | 0.00  | 0.00     | 0.00  | 0.00  |
| 2           | 6  | 0.01     | 0.40  | 0.03  | -0.37    | 0.00  | 0.00  | 0.00     | 0.25  | 0.13  |
| 3           | 8  | -0.01    | 0.26  | 0.27  | 0.17     | 0.00  | 0.00  | 0.00     | 0.25  | 0.16  |
| 4           | 6  | -0.01    | -0.40 | -0.03 | 0.37     | 0.00  | 0.00  | 0.00     | -0.25 | -0.13 |
| 5           | 8  | 0.01     | -0.26 | -0.27 | -0.17    | 0.00  | 0.00  | 0.00     | -0.25 | -0.16 |
| 6           | 6  | 0.15     | 0.22  | -0.02 | 0.18     | -0.32 | 0.00  | -0.22    | -0.12 | 0.13  |
| 7           | 8  | 0.16     | 0.02  | -0.16 | -0.09    | 0.15  | 0.00  | -0.21    | -0.12 | 0.16  |
| 8           | 6  | -0.15    | -0.22 | 0.02  | -0.18    | 0.32  | 0.00  | 0.22     | 0.12  | -0.13 |
| 9           | 8  | -0.16    | -0.02 | 0.16  | 0.09     | -0.15 | 0.00  | 0.21     | 0.12  | -0.16 |
| 10          | 6  | -0.08    | 0.19  | -0.01 | 0.18     | 0.32  | 0.00  | 0.22     | -0.12 | 0.13  |
| 11          | 8  | -0.13    | -0.01 | -0.11 | -0.09    | -0.15 | 0.00  | 0.21     | -0.12 | 0.16  |
| 12          | 6  | 0.08     | -0.19 | 0.01  | -0.18    | -0.32 | 0.00  | -0.22    | 0.12  | -0.13 |
| 13          | 8  | 0.13     | 0.01  | 0.11  | 0.09     | 0.15  | 0.00  | -0.21    | 0.12  | -0.16 |
|             |    | 16       |       |       |          | 17    |       |          | 18    |       |
|             |    | A2U      |       |       |          | EU    |       |          | EU    |       |
| Frequencies | -- | 388.6730 |       |       | 391.1545 |       |       | 391.1572 |       |       |
| Red. masses | -- | 14.8602  |       |       | 14.9905  |       |       | 14.9903  |       |       |
| Frc consts  | -- | 1.3226   |       |       | 1.3513   |       |       | 1.3513   |       |       |
| IR Inten    | -- | 5.5761   |       |       | 14.7496  |       |       | 14.7482  |       |       |
| Raman Activ | -- | 0.0000   |       |       | 0.0000   |       |       | 0.0000   |       |       |
| Depolar (P) | -- | 0.0000   |       |       | 0.0000   |       |       | 0.0000   |       |       |
| Depolar (U) | -- | 0.0000   |       |       | 0.0000   |       |       | 0.0000   |       |       |
| Atom AN     |    | X        | Y     | Z     | X        | Y     | Z     | X        | Y     | Z     |
| 1           | 24 | 0.00     | 0.00  | 0.20  | 0.00     | 0.22  | 0.00  | 0.22     | 0.00  | 0.00  |
| 2           | 6  | 0.00     | -0.31 | 0.11  | 0.00     | -0.02 | -0.45 | 0.15     | 0.00  | 0.00  |
| 3           | 8  | 0.00     | -0.13 | -0.19 | 0.00     | -0.29 | -0.02 | -0.05    | 0.00  | 0.00  |
| 4           | 6  | 0.00     | -0.31 | 0.11  | 0.00     | -0.02 | -0.45 | 0.15     | 0.00  | 0.00  |
| 5           | 8  | 0.00     | -0.13 | -0.19 | 0.00     | -0.29 | -0.02 | -0.05    | 0.00  | 0.00  |
| 6           | 6  | 0.27     | 0.15  | 0.11  | -0.07    | 0.11  | 0.23  | 0.03     | -0.07 | 0.39  |
| 7           | 8  | 0.11     | 0.06  | -0.19 | -0.10    | -0.11 | 0.01  | -0.23    | -0.10 | 0.02  |
| 8           | 6  | 0.27     | 0.15  | 0.11  | -0.07    | 0.11  | 0.23  | 0.03     | -0.07 | 0.39  |
| 9           | 8  | 0.11     | 0.06  | -0.19 | -0.10    | -0.11 | 0.01  | -0.23    | -0.10 | 0.02  |
| 10          | 6  | -0.27    | 0.15  | 0.11  | 0.07     | 0.11  | 0.23  | 0.03     | 0.07  | -0.39 |
| 11          | 8  | -0.11    | 0.06  | -0.19 | 0.10     | -0.11 | 0.01  | -0.23    | 0.10  | -0.02 |
| 12          | 6  | -0.27    | 0.15  | 0.11  | 0.07     | 0.11  | 0.23  | 0.03     | 0.07  | -0.39 |
| 13          | 8  | -0.11    | 0.06  | -0.19 | 0.10     | -0.11 | 0.01  | -0.23    | 0.10  | -0.02 |
|             |    | 19       |       |       |          | 20    |       |          | 21    |       |
|             |    | EU       |       |       |          | EU    |       |          | A1G   |       |
| Frequencies | -- | 448.7896 |       |       | 448.7901 |       |       | 458.5015 |       |       |
| Red. masses | -- | 13.3852  |       |       | 13.3853  |       |       | 12.2969  |       |       |
| Frc consts  | -- | 1.5884   |       |       | 1.5884   |       |       | 1.5231   |       |       |
| IR Inten    | -- | 1.0332   |       |       | 1.0336   |       |       | 0.0000   |       |       |
| Raman Activ | -- | 0.0000   |       |       | 0.0000   |       |       | 0.2146   |       |       |

|             |    |           |       |       |           |       |       |           |       |       |
|-------------|----|-----------|-------|-------|-----------|-------|-------|-----------|-------|-------|
| Depolar (P) | -- | 0.0000    |       |       | 0.0000    |       |       | 0.0002    |       |       |
| Depolar (U) | -- | 0.0000    |       |       | 0.0000    |       |       | 0.0004    |       |       |
| Atom AN     |    | X         | Y     | Z     | X         | Y     | Z     | X         | Y     | Z     |
| 1           | 24 | 0.00      | 0.14  | 0.00  | 0.14      | 0.00  | 0.00  | 0.00      | 0.00  | 0.00  |
| 2           | 6  | 0.00      | -0.32 | 0.28  | 0.31      | 0.00  | 0.00  | 0.00      | -0.20 | 0.34  |
| 3           | 8  | 0.00      | -0.04 | -0.19 | -0.11     | 0.00  | 0.00  | 0.00      | 0.07  | -0.09 |
| 4           | 6  | 0.00      | -0.32 | 0.28  | 0.31      | 0.00  | 0.00  | 0.00      | 0.20  | -0.34 |
| 5           | 8  | 0.00      | -0.04 | -0.19 | -0.11     | 0.00  | 0.00  | 0.00      | -0.07 | 0.09  |
| 6           | 6  | -0.28     | 0.15  | -0.14 | -0.16     | -0.28 | -0.24 | 0.17      | 0.10  | 0.34  |
| 7           | 8  | 0.03      | -0.09 | 0.09  | -0.06     | 0.03  | 0.16  | -0.06     | -0.03 | -0.09 |
| 8           | 6  | -0.28     | 0.15  | -0.14 | -0.16     | -0.28 | -0.24 | -0.17     | -0.10 | -0.34 |
| 9           | 8  | 0.03      | -0.09 | 0.09  | -0.06     | 0.03  | 0.16  | 0.06      | 0.03  | 0.09  |
| 10          | 6  | 0.28      | 0.15  | -0.14 | -0.16     | 0.28  | 0.24  | -0.17     | 0.10  | 0.34  |
| 11          | 8  | -0.03     | -0.09 | 0.09  | -0.06     | -0.03 | -0.16 | 0.06      | -0.03 | -0.09 |
| 12          | 6  | 0.28      | 0.15  | -0.14 | -0.16     | 0.28  | 0.24  | 0.17      | -0.10 | -0.34 |
| 13          | 8  | -0.03     | -0.09 | 0.09  | -0.06     | -0.03 | -0.16 | -0.06     | 0.03  | 0.09  |
|             |    | 22        |       |       | 23        |       |       | 24        |       |       |
|             |    | EG        |       |       | EG        |       |       | A1U       |       |       |
| Frequencies | -- | 481.2280  |       |       | 481.2280  |       |       | 506.1805  |       |       |
| Red. masses | -- | 12.3056   |       |       | 12.3056   |       |       | 12.3439   |       |       |
| Frc consts  | -- | 1.6790    |       |       | 1.6790    |       |       | 1.8634    |       |       |
| IR Inten    | -- | 0.0000    |       |       | 0.0000    |       |       | 0.0000    |       |       |
| Raman Activ | -- | 0.8569    |       |       | 0.8584    |       |       | 0.0000    |       |       |
| Depolar (P) | -- | 0.7500    |       |       | 0.7500    |       |       | 0.0000    |       |       |
| Depolar (U) | -- | 0.8571    |       |       | 0.8571    |       |       | 0.0000    |       |       |
| Atom AN     |    | X         | Y     | Z     | X         | Y     | Z     | X         | Y     | Z     |
| 1           | 24 | 0.00      | 0.00  | 0.00  | 0.00      | 0.00  | 0.00  | 0.00      | 0.00  | 0.00  |
| 2           | 6  | 0.49      | -0.03 | 0.03  | -0.09     | -0.15 | 0.19  | 0.39      | 0.00  | 0.00  |
| 3           | 8  | -0.14     | 0.00  | -0.01 | 0.03      | 0.00  | -0.07 | -0.12     | 0.00  | 0.00  |
| 4           | 6  | -0.49     | 0.03  | -0.03 | 0.09      | 0.15  | -0.19 | 0.39      | 0.00  | 0.00  |
| 5           | 8  | 0.14      | 0.00  | 0.01  | -0.03     | 0.00  | 0.07  | -0.12     | 0.00  | 0.00  |
| 6           | 6  | -0.04     | -0.22 | -0.18 | -0.28     | 0.38  | -0.06 | -0.20     | 0.34  | 0.00  |
| 7           | 8  | -0.02     | 0.04  | 0.07  | 0.07      | -0.12 | 0.02  | 0.06      | -0.10 | 0.00  |
| 8           | 6  | 0.04      | 0.22  | 0.18  | 0.28      | -0.38 | 0.06  | -0.20     | 0.34  | 0.00  |
| 9           | 8  | 0.02      | -0.04 | -0.07 | -0.07     | 0.12  | -0.02 | 0.06      | -0.10 | 0.00  |
| 10          | 6  | 0.06      | 0.34  | 0.14  | 0.28      | 0.28  | -0.12 | -0.20     | -0.34 | 0.00  |
| 11          | 8  | -0.04     | -0.08 | -0.06 | -0.05     | -0.09 | 0.05  | 0.06      | 0.10  | 0.00  |
| 12          | 6  | -0.06     | -0.34 | -0.14 | -0.28     | -0.28 | 0.12  | -0.20     | -0.34 | 0.00  |
| 13          | 8  | 0.04      | 0.08  | 0.06  | 0.05      | 0.09  | -0.05 | 0.06      | 0.10  | 0.00  |
|             |    | 25        |       |       | 26        |       |       | 27        |       |       |
|             |    | A2U       |       |       | EU        |       |       | EU        |       |       |
| Frequencies | -- | 526.6732  |       |       | 621.4873  |       |       | 621.4876  |       |       |
| Red. masses | -- | 18.5426   |       |       | 17.2378   |       |       | 17.2379   |       |       |
| Frc consts  | -- | 3.0304    |       |       | 3.9228    |       |       | 3.9228    |       |       |
| IR Inten    | -- | 84.6786   |       |       | 126.2013  |       |       | 126.2037  |       |       |
| Raman Activ | -- | 0.0000    |       |       | 0.0000    |       |       | 0.0000    |       |       |
| Depolar (P) | -- | 0.0000    |       |       | 0.0000    |       |       | 0.0000    |       |       |
| Depolar (U) | -- | 0.0000    |       |       | 0.0000    |       |       | 0.0000    |       |       |
| Atom AN     |    | X         | Y     | Z     | X         | Y     | Z     | X         | Y     | Z     |
| 1           | 24 | 0.00      | 0.00  | 0.39  | 0.00      | 0.35  | 0.00  | 0.35      | 0.00  | 0.00  |
| 2           | 6  | 0.00      | 0.10  | -0.33 | 0.00      | -0.15 | 0.11  | -0.48     | 0.00  | 0.00  |
| 3           | 8  | 0.00      | -0.13 | 0.04  | 0.00      | -0.04 | -0.07 | 0.13      | 0.00  | 0.00  |
| 4           | 6  | 0.00      | 0.10  | -0.33 | 0.00      | -0.15 | 0.11  | -0.48     | 0.00  | 0.00  |
| 5           | 8  | 0.00      | -0.13 | 0.04  | 0.00      | -0.04 | -0.07 | 0.13      | 0.00  | 0.00  |
| 6           | 6  | -0.09     | -0.05 | -0.33 | 0.14      | -0.40 | -0.05 | -0.23     | 0.14  | -0.09 |
| 7           | 8  | 0.11      | 0.07  | 0.04  | -0.07     | 0.09  | 0.04  | 0.01      | -0.07 | 0.06  |
| 8           | 6  | -0.09     | -0.05 | -0.33 | 0.14      | -0.40 | -0.05 | -0.23     | 0.14  | -0.09 |
| 9           | 8  | 0.11      | 0.07  | 0.04  | -0.07     | 0.09  | 0.04  | 0.01      | -0.07 | 0.06  |
| 10          | 6  | 0.09      | -0.05 | -0.33 | -0.14     | -0.40 | -0.05 | -0.23     | -0.14 | 0.09  |
| 11          | 8  | -0.11     | 0.07  | 0.04  | 0.07      | 0.09  | 0.04  | 0.01      | 0.07  | -0.06 |
| 12          | 6  | 0.09      | -0.05 | -0.33 | -0.14     | -0.40 | -0.05 | -0.23     | -0.14 | 0.09  |
| 13          | 8  | -0.11     | 0.07  | 0.04  | 0.07      | 0.09  | 0.04  | 0.01      | 0.07  | -0.06 |
|             |    | 28        |       |       | 29        |       |       | 30        |       |       |
|             |    | EG        |       |       | EG        |       |       | EU        |       |       |
| Frequencies | -- | 2073.8421 |       |       | 2073.8421 |       |       | 2081.0179 |       |       |
| Red. masses | -- | 13.4118   |       |       | 13.4118   |       |       | 13.4233   |       |       |
| Frc consts  | -- | 33.9851   |       |       | 33.9851   |       |       | 34.2500   |       |       |
| IR Inten    | -- | 0.0000    |       |       | 0.0000    |       |       | 999.4578  |       |       |
| Raman Activ | -- | 412.8145  |       |       | 412.6342  |       |       | 0.0000    |       |       |
| Depolar (P) | -- | 0.7500    |       |       | 0.7500    |       |       | 0.0000    |       |       |
| Depolar (U) | -- | 0.8571    |       |       | 0.8571    |       |       | 0.0000    |       |       |
| Atom AN     |    | X         | Y     | Z     | X         | Y     | Z     | X         | Y     | Z     |
| 1           | 24 | 0.00      | 0.00  | 0.00  | 0.00      | 0.00  | 0.00  | 0.00      | 0.00  | 0.00  |
| 2           | 6  | 0.00      | -0.04 | -0.03 | 0.00      | -0.39 | -0.24 | 0.00      | 0.39  | 0.24  |
| 3           | 8  | 0.00      | 0.03  | 0.02  | 0.00      | 0.29  | 0.18  | 0.00      | -0.29 | -0.18 |
| 4           | 6  | 0.00      | 0.04  | 0.03  | 0.00      | 0.39  | 0.24  | 0.00      | 0.39  | 0.24  |
| 5           | 8  | 0.00      | -0.03 | -0.02 | 0.00      | -0.29 | -0.18 | 0.00      | -0.29 | -0.18 |
| 6           | 6  | -0.31     | -0.18 | 0.22  | -0.14     | -0.08 | 0.10  | 0.17      | 0.10  | -0.12 |

|             |    |           |       |       |           |       |       |           |       |       |
|-------------|----|-----------|-------|-------|-----------|-------|-------|-----------|-------|-------|
| 7           | 8  | 0.23      | 0.13  | -0.17 | 0.10      | 0.06  | -0.07 | -0.13     | -0.07 | 0.09  |
| 8           | 6  | 0.31      | 0.18  | -0.22 | 0.14      | 0.08  | -0.10 | 0.17      | 0.10  | -0.12 |
| 9           | 8  | -0.23     | -0.13 | 0.17  | -0.10     | -0.06 | 0.07  | -0.13     | -0.07 | 0.09  |
| 10          | 6  | -0.27     | 0.16  | -0.20 | 0.21      | -0.11 | 0.14  | -0.17     | 0.10  | -0.12 |
| 11          | 8  | 0.20      | -0.12 | 0.15  | -0.15     | 0.09  | -0.11 | 0.13      | -0.07 | 0.09  |
| 12          | 6  | 0.27      | -0.16 | 0.20  | -0.21     | 0.11  | -0.14 | -0.17     | 0.10  | -0.12 |
| 13          | 8  | -0.20     | 0.12  | -0.15 | 0.15      | -0.09 | 0.11  | 0.13      | -0.07 | 0.09  |
|             |    | 31        |       |       | 32        |       |       | 33        |       |       |
|             |    | EU        |       |       | A2U       |       |       | A1G       |       |       |
| Frequencies | -- | 2081.0179 |       |       | 2083.8290 |       |       | 2157.1878 |       |       |
| Red. masses | -- | 13.4233   |       |       | 13.4148   |       |       | 13.3446   |       |       |
| Frc consts  | -- | 34.2500   |       |       | 34.3209   |       |       | 36.5875   |       |       |
| IR Inten    | -- | 999.4682  |       |       | 816.0331  |       |       | 0.0000    |       |       |
| Raman Activ | -- | 0.0000    |       |       | 0.0000    |       |       | 208.3320  |       |       |
| Depolar (P) | -- | 0.0000    |       |       | 0.0000    |       |       | 0.0022    |       |       |
| Depolar (U) | -- | 0.0000    |       |       | 0.0000    |       |       | 0.0043    |       |       |
| Atom AN     |    | X         | Y     | Z     | X         | Y     | Z     | X         | Y     | Z     |
| 1           | 24 | 0.00      | 0.00  | 0.00  | 0.00      | 0.00  | 0.00  | 0.00      | 0.00  | 0.00  |
| 2           | 6  | 0.00      | 0.00  | 0.00  | 0.00      | 0.28  | 0.17  | 0.00      | -0.28 | -0.18 |
| 3           | 8  | 0.00      | 0.00  | 0.00  | 0.00      | -0.21 | -0.13 | 0.00      | 0.20  | 0.13  |
| 4           | 6  | 0.00      | 0.00  | 0.00  | 0.00      | 0.28  | 0.17  | 0.00      | 0.28  | 0.18  |
| 5           | 8  | 0.00      | 0.00  | 0.00  | 0.00      | -0.21 | -0.13 | 0.00      | -0.20 | -0.13 |
| 6           | 6  | 0.29      | 0.17  | -0.21 | -0.24     | -0.14 | 0.17  | 0.24      | 0.14  | -0.18 |
| 7           | 8  | -0.22     | -0.13 | 0.16  | 0.18      | 0.10  | -0.13 | -0.17     | -0.10 | 0.13  |
| 8           | 6  | 0.29      | 0.17  | -0.21 | -0.24     | -0.14 | 0.17  | -0.24     | -0.14 | 0.18  |
| 9           | 8  | -0.22     | -0.13 | 0.16  | 0.18      | 0.10  | -0.13 | 0.17      | 0.10  | -0.13 |
| 10          | 6  | 0.30      | -0.17 | 0.21  | 0.24      | -0.14 | 0.17  | -0.24     | 0.14  | -0.18 |
| 11          | 8  | -0.22     | 0.13  | -0.16 | -0.18     | 0.10  | -0.13 | 0.17      | -0.10 | 0.13  |
| 12          | 6  | 0.30      | -0.17 | 0.21  | 0.24      | -0.14 | 0.17  | 0.24      | -0.14 | 0.18  |
| 13          | 8  | -0.22     | 0.13  | -0.16 | -0.18     | 0.10  | -0.13 | -0.17     | 0.10  | -0.13 |

Supplementary Data 11 gives full information on the Gaussian calculations of  $[\text{Cr}(\text{CO})_5(\text{NO})]^+$ .

Supplementary Data 11. Information on the atomic coordinates and vibrational spectra of  $[\text{Cr}(\text{CO})_5(\text{NO})]^+$ .

Harmonic frequencies ( $\text{cm}^{-1}$ ), IR intensities ( $\text{KM}/\text{Mole}$ ), Raman scattering activities ( $\text{A}^4/\text{AMU}$ ), depolarization ratios for plane and unpolarized incident light, reduced masses ( $\text{AMU}$ ), force constants ( $\text{mDyne}/\text{A}$ ), and normal coordinates:

|             |    |         |       |       |         |      |       |         |       |       |
|-------------|----|---------|-------|-------|---------|------|-------|---------|-------|-------|
|             |    | 1       |       |       | 2       |      |       | 3       |       |       |
|             |    | E       |       |       | E       |      |       | B2      |       |       |
| Frequencies | -- | 62.7133 |       |       | 62.7133 |      |       | 72.5640 |       |       |
| Red. masses | -- | 15.4012 |       |       | 15.4012 |      |       | 15.4145 |       |       |
| Frc consts  | -- | 0.0357  |       |       | 0.0357  |      |       | 0.0478  |       |       |
| IR Inten    | -- | 0.0046  |       |       | 0.0046  |      |       | 0.0000  |       |       |
| Raman Activ | -- | 0.0005  |       |       | 0.0005  |      |       | 0.0313  |       |       |
| Depolar (P) | -- | 0.7500  |       |       | 0.7500  |      |       | 0.7500  |       |       |
| Depolar (U) | -- | 0.8571  |       |       | 0.8571  |      |       | 0.8571  |       |       |
| Atom AN     |    | X       | Y     | Z     | X       | Y    | Z     | X       | Y     | Z     |
| 1           | 24 | 0.00    | -0.01 | 0.00  | -0.01   | 0.00 | 0.00  | 0.00    | 0.00  | 0.00  |
| 2           | 7  | 0.00    | 0.16  | 0.00  | 0.16    | 0.00 | 0.00  | 0.00    | 0.00  | 0.00  |
| 3           | 8  | 0.00    | 0.41  | 0.00  | 0.41    | 0.00 | 0.00  | 0.00    | 0.00  | 0.00  |
| 4           | 6  | 0.00    | 0.23  | 0.00  | 0.23    | 0.00 | 0.00  | 0.00    | 0.00  | 0.00  |
| 5           | 8  | 0.00    | 0.53  | 0.00  | 0.53    | 0.00 | 0.00  | 0.00    | 0.00  | 0.00  |
| 6           | 6  | 0.00    | -0.02 | -0.03 | -0.20   | 0.00 | 0.00  | 0.00    | 0.01  | 0.19  |
| 7           | 8  | 0.00    | -0.02 | -0.06 | -0.44   | 0.00 | 0.00  | 0.00    | 0.02  | 0.46  |
| 8           | 6  | 0.00    | -0.02 | 0.03  | -0.20   | 0.00 | 0.00  | 0.00    | -0.01 | 0.19  |
| 9           | 8  | 0.00    | -0.02 | 0.06  | -0.44   | 0.00 | 0.00  | 0.00    | -0.02 | 0.46  |
| 10          | 6  | 0.00    | -0.20 | 0.00  | -0.02   | 0.00 | 0.03  | 0.01    | 0.00  | -0.19 |
| 11          | 8  | 0.00    | -0.44 | 0.00  | -0.02   | 0.00 | 0.06  | 0.02    | 0.00  | -0.46 |
| 12          | 6  | 0.00    | -0.20 | 0.00  | -0.02   | 0.00 | -0.03 | -0.01   | 0.00  | -0.19 |
| 13          | 8  | 0.00    | -0.44 | 0.00  | -0.02   | 0.00 | -0.06 | -0.02   | 0.00  | -0.46 |
|             |    | 4       |       |       | 5       |      |       | 6       |       |       |
|             |    | B1      |       |       | E       |      |       | E       |       |       |
| Frequencies | -- | 89.5189 |       |       | 92.9482 |      |       | 92.9482 |       |       |
| Red. masses | -- | 15.5371 |       |       | 15.7449 |      |       | 15.7449 |       |       |
| Frc consts  | -- | 0.0734  |       |       | 0.0801  |      |       | 0.0801  |       |       |
| IR Inten    | -- | 0.0000  |       |       | 0.0788  |      |       | 0.0788  |       |       |
| Raman Activ | -- | 10.0475 |       |       | 9.8102  |      |       | 9.8102  |       |       |
| Depolar (P) | -- | 0.7500  |       |       | 0.7500  |      |       | 0.7500  |       |       |
| Depolar (U) | -- | 0.8571  |       |       | 0.8571  |      |       | 0.8571  |       |       |
| Atom AN     |    | X       | Y     | Z     | X       | Y    | Z     | X       | Y     | Z     |

|             |    |          |       |       |          |       |       |          |       |       |
|-------------|----|----------|-------|-------|----------|-------|-------|----------|-------|-------|
| 1           | 24 | 0.00     | 0.00  | 0.00  | -0.06    | 0.00  | 0.00  | 0.00     | -0.06 | 0.00  |
| 2           | 7  | 0.00     | 0.00  | 0.00  | -0.18    | 0.00  | 0.00  | 0.00     | -0.18 | 0.00  |
| 3           | 8  | 0.00     | 0.00  | 0.00  | -0.40    | 0.00  | 0.00  | 0.00     | -0.40 | 0.00  |
| 4           | 6  | 0.00     | 0.00  | 0.00  | 0.14     | 0.00  | 0.00  | 0.00     | 0.14  | 0.00  |
| 5           | 8  | 0.00     | 0.00  | 0.00  | 0.50     | 0.00  | 0.00  | 0.00     | 0.50  | 0.00  |
| 6           | 6  | -0.17    | 0.00  | 0.00  | 0.03     | 0.00  | 0.00  | 0.00     | -0.07 | -0.15 |
| 7           | 8  | -0.47    | 0.00  | 0.00  | 0.17     | 0.00  | 0.00  | 0.00     | -0.08 | -0.45 |
| 8           | 6  | 0.17     | 0.00  | 0.00  | 0.03     | 0.00  | 0.00  | 0.00     | -0.07 | 0.15  |
| 9           | 8  | 0.47     | 0.00  | 0.00  | 0.17     | 0.00  | 0.00  | 0.00     | -0.08 | 0.45  |
| 10          | 6  | 0.00     | 0.17  | 0.00  | -0.07    | 0.00  | 0.15  | 0.00     | 0.03  | 0.00  |
| 11          | 8  | 0.00     | 0.47  | 0.00  | -0.08    | 0.00  | 0.45  | 0.00     | 0.17  | 0.00  |
| 12          | 6  | 0.00     | -0.17 | 0.00  | -0.07    | 0.00  | -0.15 | 0.00     | 0.03  | 0.00  |
| 13          | 8  | 0.00     | -0.47 | 0.00  | -0.08    | 0.00  | -0.45 | 0.00     | 0.17  | 0.00  |
| 7           |    |          |       |       |          |       |       |          |       |       |
| E           |    |          |       |       |          |       |       |          |       |       |
| Frequencies | -- | 105.1021 |       |       | 105.1021 |       |       | 105.7963 |       |       |
| Red. masses | -- | 17.1048  |       |       | 17.1048  |       |       | 17.4420  |       |       |
| Frc consts  | -- | 0.1113   |       |       | 0.1113   |       |       | 0.1150   |       |       |
| IR Inten    | -- | 0.7855   |       |       | 0.7855   |       |       | 1.9952   |       |       |
| Raman Activ | -- | 1.4061   |       |       | 1.4061   |       |       | 0.2794   |       |       |
| Depolar (P) | -- | 0.7500   |       |       | 0.7500   |       |       | 0.6147   |       |       |
| Depolar (U) | -- | 0.8571   |       |       | 0.8571   |       |       | 0.7614   |       |       |
| Atom AN     |    | X        | Y     | Z     | X        | Y     | Z     | X        | Y     | Z     |
| 1           | 24 | -0.21    | 0.02  | 0.00  | -0.02    | -0.21 | 0.00  | 0.00     | 0.00  | 0.23  |
| 2           | 7  | 0.06     | -0.01 | 0.00  | 0.01     | 0.06  | 0.00  | 0.00     | 0.00  | 0.24  |
| 3           | 8  | 0.53     | -0.06 | 0.00  | 0.06     | 0.53  | 0.00  | 0.00     | 0.00  | 0.24  |
| 4           | 6  | -0.04    | 0.00  | 0.00  | 0.00     | -0.04 | 0.00  | 0.00     | 0.00  | 0.27  |
| 5           | 8  | 0.23     | -0.02 | 0.00  | 0.02     | 0.23  | 0.00  | 0.00     | 0.00  | 0.27  |
| 6           | 6  | 0.00     | 0.03  | 0.00  | 0.00     | -0.25 | 0.03  | 0.00     | -0.01 | 0.00  |
| 7           | 8  | 0.39     | 0.03  | -0.01 | 0.04     | -0.25 | 0.14  | 0.00     | -0.03 | -0.41 |
| 8           | 6  | 0.00     | 0.03  | 0.00  | 0.00     | -0.25 | -0.03 | 0.00     | 0.01  | 0.00  |
| 9           | 8  | 0.39     | 0.03  | 0.01  | 0.04     | -0.25 | -0.14 | 0.00     | 0.03  | -0.41 |
| 10          | 6  | -0.25    | 0.00  | -0.03 | -0.03    | 0.00  | 0.00  | 0.01     | 0.00  | 0.00  |
| 11          | 8  | -0.25    | -0.04 | -0.14 | -0.03    | 0.39  | -0.01 | 0.03     | 0.00  | -0.41 |
| 12          | 6  | -0.25    | 0.00  | 0.03  | -0.03    | 0.00  | 0.00  | -0.01    | 0.00  | 0.00  |
| 13          | 8  | -0.25    | -0.04 | 0.14  | -0.03    | 0.39  | 0.01  | -0.03    | 0.00  | -0.41 |
| 10          |    |          |       |       |          |       |       |          |       |       |
| E           |    |          |       |       |          |       |       |          |       |       |
| Frequencies | -- | 336.1628 |       |       | 336.1628 |       |       | 343.0159 |       |       |
| Red. masses | -- | 12.9201  |       |       | 12.9201  |       |       | 12.7317  |       |       |
| Frc consts  | -- | 0.8602   |       |       | 0.8602   |       |       | 0.8826   |       |       |
| IR Inten    | -- | 0.1362   |       |       | 0.1362   |       |       | 0.0000   |       |       |
| Raman Activ | -- | 0.0023   |       |       | 0.0023   |       |       | 0.0000   |       |       |
| Depolar (P) | -- | 0.7500   |       |       | 0.7500   |       |       | 0.0000   |       |       |
| Depolar (U) | -- | 0.8571   |       |       | 0.8571   |       |       | 0.0000   |       |       |
| Atom AN     |    | X        | Y     | Z     | X        | Y     | Z     | X        | Y     | Z     |
| 1           | 24 | 0.01     | 0.00  | 0.00  | 0.00     | 0.01  | 0.00  | 0.00     | 0.00  | 0.00  |
| 2           | 7  | -0.27    | -0.10 | 0.00  | 0.10     | -0.27 | 0.00  | 0.00     | 0.00  | 0.00  |
| 3           | 8  | 0.17     | 0.06  | 0.00  | -0.06    | 0.17  | 0.00  | 0.00     | 0.00  | 0.00  |
| 4           | 6  | 0.53     | 0.19  | 0.00  | -0.19    | 0.53  | 0.00  | 0.00     | 0.00  | 0.00  |
| 5           | 8  | -0.23    | -0.09 | 0.00  | 0.09     | -0.23 | 0.00  | 0.00     | 0.00  | 0.00  |
| 6           | 6  | 0.00     | -0.01 | 0.16  | 0.00     | -0.03 | 0.43  | 0.45     | 0.00  | 0.00  |
| 7           | 8  | 0.00     | -0.02 | -0.07 | 0.00     | -0.05 | -0.20 | -0.21    | 0.00  | 0.00  |
| 8           | 6  | 0.00     | -0.01 | -0.16 | 0.00     | -0.03 | -0.43 | -0.45    | 0.00  | 0.00  |
| 9           | 8  | 0.00     | -0.02 | 0.07  | 0.00     | -0.05 | 0.20  | 0.21     | 0.00  | 0.00  |
| 10          | 6  | -0.03    | 0.00  | -0.43 | 0.01     | 0.00  | 0.16  | 0.00     | 0.45  | 0.00  |
| 11          | 8  | -0.05    | 0.00  | 0.20  | 0.02     | 0.00  | -0.07 | 0.00     | -0.21 | 0.00  |
| 12          | 6  | -0.03    | 0.00  | 0.43  | 0.01     | 0.00  | -0.16 | 0.00     | -0.45 | 0.00  |
| 13          | 8  | -0.05    | 0.00  | -0.20 | 0.02     | 0.00  | 0.07  | 0.00     | 0.21  | 0.00  |
| 11          |    |          |       |       |          |       |       |          |       |       |
| E           |    |          |       |       |          |       |       |          |       |       |
| Frequencies | -- | 336.1628 |       |       | 336.1628 |       |       | 343.0159 |       |       |
| Red. masses | -- | 12.9201  |       |       | 12.9201  |       |       | 12.7317  |       |       |
| Frc consts  | -- | 0.8602   |       |       | 0.8602   |       |       | 0.8826   |       |       |
| IR Inten    | -- | 0.1362   |       |       | 0.1362   |       |       | 0.0000   |       |       |
| Raman Activ | -- | 0.0023   |       |       | 0.0023   |       |       | 0.0000   |       |       |
| Depolar (P) | -- | 0.7500   |       |       | 0.7500   |       |       | 0.0000   |       |       |
| Depolar (U) | -- | 0.8571   |       |       | 0.8571   |       |       | 0.0000   |       |       |
| Atom AN     |    | X        | Y     | Z     | X        | Y     | Z     | X        | Y     | Z     |
| 1           | 24 | 0.01     | 0.00  | 0.00  | 0.00     | 0.01  | 0.00  | 0.00     | 0.00  | 0.00  |
| 2           | 7  | -0.27    | -0.10 | 0.00  | 0.10     | -0.27 | 0.00  | 0.00     | 0.00  | 0.00  |
| 3           | 8  | 0.17     | 0.06  | 0.00  | -0.06    | 0.17  | 0.00  | 0.00     | 0.00  | 0.00  |
| 4           | 6  | 0.53     | 0.19  | 0.00  | -0.19    | 0.53  | 0.00  | 0.00     | 0.00  | 0.00  |
| 5           | 8  | -0.23    | -0.09 | 0.00  | 0.09     | -0.23 | 0.00  | 0.00     | 0.00  | 0.00  |
| 6           | 6  | 0.00     | -0.01 | 0.16  | 0.00     | -0.03 | 0.43  | 0.45     | 0.00  | 0.00  |
| 7           | 8  | 0.00     | -0.02 | -0.07 | 0.00     | -0.05 | -0.20 | -0.21    | 0.00  | 0.00  |
| 8           | 6  | 0.00     | -0.01 | -0.16 | 0.00     | -0.03 | -0.43 | -0.45    | 0.00  | 0.00  |
| 9           | 8  | 0.00     | -0.02 | 0.07  | 0.00     | -0.05 | 0.20  | 0.21     | 0.00  | 0.00  |
| 10          | 6  | -0.03    | 0.00  | -0.43 | 0.01     | 0.00  | 0.16  | 0.00     | 0.45  | 0.00  |
| 11          | 8  | -0.05    | 0.00  | 0.20  | 0.02     | 0.00  | -0.07 | 0.00     | -0.21 | 0.00  |
| 12          | 6  | -0.03    | 0.00  | 0.43  | 0.01     | 0.00  | -0.16 | 0.00     | -0.45 | 0.00  |
| 13          | 8  | -0.05    | 0.00  | -0.20 | 0.02     | 0.00  | 0.07  | 0.00     | 0.21  | 0.00  |
| 12          |    |          |       |       |          |       |       |          |       |       |
| E           |    |          |       |       |          |       |       |          |       |       |
| Frequencies | -- | 336.1628 |       |       | 336.1628 |       |       | 343.0159 |       |       |
| Red. masses | -- | 12.9201  |       |       | 12.9201  |       |       | 12.7317  |       |       |
| Frc consts  | -- | 0.8602   |       |       | 0.8602   |       |       | 0.8826   |       |       |
| IR Inten    | -- | 0.1362   |       |       | 0.1362   |       |       | 0.0000   |       |       |
| Raman Activ | -- | 0.0023   |       |       | 0.0023   |       |       | 0.0000   |       |       |
| Depolar (P) | -- | 0.7500   |       |       | 0.7500   |       |       | 0.0000   |       |       |
| Depolar (U) | -- | 0.8571   |       |       | 0.8571   |       |       | 0.0000   |       |       |
| Atom AN     |    | X        | Y     | Z     | X        | Y     | Z     | X        | Y     | Z     |
| 1           | 24 | 0.01     | 0.00  | 0.00  | 0.00     | 0.01  | 0.00  | 0.00     | 0.00  | 0.00  |
| 2           | 7  | -0.27    | -0.10 | 0.00  | 0.10     | -0.27 | 0.00  | 0.00     | 0.00  | 0.00  |
| 3           | 8  | 0.17     | 0.06  | 0.00  | -0.06    | 0.17  | 0.00  | 0.00     | 0.00  | 0.00  |
| 4           | 6  | 0.53     | 0.19  | 0.00  | -0.19    | 0.53  | 0.00  | 0.00     | 0.00  | 0.00  |
| 5           | 8  | -0.23    | -0.09 | 0.00  | 0.09     | -0.23 | 0.00  | 0.00     | 0.00  | 0.00  |
| 6           | 6  | 0.00     | -0.01 | 0.16  | 0.00     | -0.03 | 0.43  | 0.45     | 0.00  | 0.00  |
| 7           | 8  | 0.00     | -0.02 | -0.07 | 0.00     | -0.05 | -0.20 | -0.21    | 0.00  | 0.00  |
| 8           | 6  | 0.00     | -0.01 | -0.16 | 0.00     | -0.03 | -0.43 | -0.45    | 0.00  | 0.00  |
| 9           | 8  | 0.00     | -0.02 | 0.07  | 0.00     | -0.05 | 0.20  | 0.21     | 0.00  | 0.00  |
| 10          | 6  | -0.03    | 0.00  | -0.43 | 0.01     | 0.00  | 0.16  | 0.00     | 0.45  | 0.00  |
| 11          | 8  | -0.05    | 0.00  | 0.20  | 0.02     | 0.00  | -0.07 | 0.00     | -0.21 | 0.00  |
| 12          | 6  | -0.03    | 0.00  | 0.43  | 0.01     | 0.00  | -0.16 | 0.00     | -0.45 | 0.00  |
| 13          | 8  | -0.05    | 0.00  | -0.20 | 0.02     | 0.00  | 0.07  | 0.00     | 0.21  | 0.00  |
| 13          |    |          |       |       |          |       |       |          |       |       |
| A1          |    |          |       |       |          |       |       |          |       |       |
| Frequencies | -- | 351.3566 |       |       | 364.6065 |       |       | 366.9204 |       |       |
| Red. masses | -- | 14.9933  |       |       | 14.0709  |       |       | 14.0998  |       |       |
| Frc consts  | -- | 1.0905   |       |       | 1.1021   |       |       | 1.1184   |       |       |
| IR Inten    | -- | 10.0335  |       |       | 0.0000   |       |       | 0.2793   |       |       |
| Raman Activ | -- | 2.8271   |       |       | 1.6041   |       |       | 19.5696  |       |       |
| Depolar (P) | -- | 0.0639   |       |       | 0.7500   |       |       | 0.0320   |       |       |
| Depolar (U) | -- | 0.1201   |       |       | 0.8571   |       |       | 0.0620   |       |       |
| Atom AN     |    | X        | Y     | Z     | X        | Y     | Z     | X        | Y     | Z     |
| 1           | 24 | 0.00     | 0.00  | -0.16 | 0.00     | 0.00  | 0.00  | 0.00     | 0.00  | -0.01 |
| 2           | 7  | 0.00     | 0.00  | -0.19 | 0.00     | 0.00  | 0.00  | 0.00     | 0.00  | 0.00  |
| 3           | 8  | 0.00     | 0.00  | -0.21 | 0.00     | 0.00  | 0.00  | 0.00     | 0.00  | -0.01 |
| 4           | 6  | 0.00     | 0.00  | 0.62  | 0.00     | 0.00  | 0.00  | 0.00     | 0.00  | -0.01 |
| 5           | 8  | 0.00     | 0.00  | 0.64  | 0.00     | 0.00  | 0.00  | 0.00     | 0.00  | -0.01 |
| 6           | 6  | 0.00     | 0.00  | -0.14 | 0.00     | 0.35  | 0.01  | 0.00     | -0.34 | -0.02 |
| 7           | 8  | 0.00     | 0.00  | 0.05  | 0.00     | 0.36  | -0.02 | 0.00     | -0.36 | 0.03  |
| 8           | 6  | 0.00     | 0.00  | -0.14 | 0.00     | -0.35 | 0.01  | 0.00     | 0.34  | -0.02 |
| 9           | 8  | 0.00     | 0.00  | 0.05  | 0.00     | -0.36 | -0.02 | 0.00     | 0.36  | 0.03  |

|             |    |          |       |       |          |       |       |          |       |       |
|-------------|----|----------|-------|-------|----------|-------|-------|----------|-------|-------|
| 10          | 6  | 0.00     | 0.00  | -0.14 | 0.35     | 0.00  | -0.01 | 0.34     | 0.00  | -0.02 |
| 11          | 8  | 0.00     | 0.00  | 0.05  | 0.36     | 0.00  | 0.02  | 0.36     | 0.00  | 0.03  |
| 12          | 6  | 0.00     | 0.00  | -0.14 | -0.35    | 0.00  | -0.01 | -0.34    | 0.00  | -0.02 |
| 13          | 8  | 0.00     | 0.00  | 0.05  | -0.36    | 0.00  | 0.02  | -0.36    | 0.00  | 0.03  |
|             |    |          | 16    |       |          | 17    |       |          | 18    |       |
|             |    |          | E     |       |          | E     |       |          | E     |       |
| Frequencies | -- | 416.8436 |       |       | 416.8436 |       |       | 471.5384 |       |       |
| Red. masses | -- | 16.4996  |       |       | 16.4996  |       |       | 12.3459  |       |       |
| Frc consts  | -- | 1.6892   |       |       | 1.6892   |       |       | 1.6174   |       |       |
| IR Inten    | -- | 22.0302  |       |       | 22.0302  |       |       | 0.1213   |       |       |
| Raman Activ | -- | 0.2098   |       |       | 0.2098   |       |       | 0.1307   |       |       |
| Depolar (P) | -- | 0.7500   |       |       | 0.7500   |       |       | 0.7500   |       |       |
| Depolar (U) | -- | 0.8571   |       |       | 0.8571   |       |       | 0.8571   |       |       |
| Atom AN     |    | X        | Y     | Z     | X        | Y     | Z     | X        | Y     | Z     |
| 1           | 24 | -0.01    | 0.27  | 0.00  | 0.27     | 0.01  | 0.00  | -0.01    | 0.00  | 0.00  |
| 2           | 7  | -0.01    | 0.29  | 0.00  | 0.29     | 0.01  | 0.00  | 0.03     | 0.00  | 0.00  |
| 3           | 8  | 0.01     | -0.14 | 0.00  | -0.14    | -0.01 | 0.00  | -0.05    | 0.00  | 0.00  |
| 4           | 6  | -0.01    | 0.19  | 0.00  | 0.19     | 0.01  | 0.00  | 0.67     | -0.02 | 0.00  |
| 5           | 8  | 0.00     | -0.06 | 0.00  | -0.06    | 0.00  | 0.00  | -0.20    | 0.00  | 0.00  |
| 6           | 6  | -0.01    | -0.37 | -0.06 | 0.30     | -0.02 | 0.00  | -0.29    | 0.00  | 0.01  |
| 7           | 8  | 0.00     | -0.38 | 0.04  | -0.10    | -0.02 | 0.00  | 0.10     | 0.00  | 0.00  |
| 8           | 6  | -0.01    | -0.37 | 0.06  | 0.30     | -0.02 | 0.00  | -0.29    | 0.00  | -0.01 |
| 9           | 8  | 0.00     | -0.38 | -0.04 | -0.10    | -0.02 | 0.00  | 0.10     | 0.00  | 0.00  |
| 10          | 6  | 0.02     | 0.30  | 0.00  | -0.37    | 0.01  | 0.06  | -0.01    | 0.01  | 0.39  |
| 11          | 8  | 0.02     | -0.10 | 0.00  | -0.38    | 0.00  | -0.04 | 0.01     | 0.00  | -0.11 |
| 12          | 6  | 0.02     | 0.30  | 0.00  | -0.37    | 0.01  | -0.06 | -0.01    | 0.01  | -0.39 |
| 13          | 8  | 0.02     | -0.10 | 0.00  | -0.38    | 0.00  | 0.04  | 0.01     | 0.00  | 0.11  |
|             |    |          | 19    |       |          | 20    |       |          | 21    |       |
|             |    |          | E     |       |          | B2    |       |          | B1    |       |
| Frequencies | -- | 471.5384 |       |       | 476.6143 |       |       | 503.0172 |       |       |
| Red. masses | -- | 12.3459  |       |       | 12.3497  |       |       | 12.2713  |       |       |
| Frc consts  | -- | 1.6174   |       |       | 1.6529   |       |       | 1.8294   |       |       |
| IR Inten    | -- | 0.1213   |       |       | 0.0000   |       |       | 0.0000   |       |       |
| Raman Activ | -- | 0.1307   |       |       | 0.0024   |       |       | 0.0181   |       |       |
| Depolar (P) | -- | 0.7500   |       |       | 0.7500   |       |       | 0.7500   |       |       |
| Depolar (U) | -- | 0.8571   |       |       | 0.8571   |       |       | 0.8571   |       |       |
| Atom AN     |    | X        | Y     | Z     | X        | Y     | Z     | X        | Y     | Z     |
| 1           | 24 | 0.00     | -0.01 | 0.00  | 0.00     | 0.00  | 0.00  | 0.00     | 0.00  | 0.00  |
| 2           | 7  | 0.00     | 0.03  | 0.00  | 0.00     | 0.00  | 0.00  | 0.00     | 0.00  | 0.00  |
| 3           | 8  | 0.00     | -0.05 | 0.00  | 0.00     | 0.00  | 0.00  | 0.00     | 0.00  | 0.00  |
| 4           | 6  | 0.02     | 0.67  | 0.00  | 0.00     | 0.00  | 0.00  | 0.00     | 0.00  | 0.00  |
| 5           | 8  | 0.00     | -0.20 | 0.00  | 0.00     | 0.00  | 0.00  | 0.00     | 0.00  | 0.00  |
| 6           | 6  | -0.01    | -0.01 | -0.39 | 0.00     | 0.00  | 0.48  | -0.48    | 0.00  | 0.00  |
| 7           | 8  | 0.00     | 0.01  | 0.11  | 0.00     | -0.02 | -0.15 | 0.13     | 0.00  | 0.00  |
| 8           | 6  | -0.01    | -0.01 | 0.39  | 0.00     | 0.00  | 0.48  | 0.48     | 0.00  | 0.00  |
| 9           | 8  | 0.00     | 0.01  | -0.11 | 0.00     | 0.02  | -0.15 | -0.13    | 0.00  | 0.00  |
| 10          | 6  | 0.00     | -0.29 | 0.01  | 0.00     | 0.00  | -0.48 | 0.00     | 0.48  | 0.00  |
| 11          | 8  | 0.00     | 0.10  | 0.00  | -0.02    | 0.00  | 0.15  | 0.00     | -0.13 | 0.00  |
| 12          | 6  | 0.00     | -0.29 | -0.01 | 0.00     | 0.00  | -0.48 | 0.00     | -0.48 | 0.00  |
| 13          | 8  | 0.00     | 0.10  | 0.00  | 0.02     | 0.00  | 0.15  | 0.00     | 0.13  | 0.00  |
|             |    |          | 22    |       |          | 23    |       |          | 24    |       |
|             |    |          | A1    |       |          | E     |       |          | E     |       |
| Frequencies | -- | 503.9992 |       |       | 531.9981 |       |       | 531.9981 |       |       |
| Red. masses | -- | 13.6139  |       |       | 13.3178  |       |       | 13.3178  |       |       |
| Frc consts  | -- | 2.0375   |       |       | 2.2208   |       |       | 2.2208   |       |       |
| IR Inten    | -- | 2.4584   |       |       | 25.9963  |       |       | 25.9963  |       |       |
| Raman Activ | -- | 16.4508  |       |       | 0.0211   |       |       | 0.0211   |       |       |
| Depolar (P) | -- | 0.1515   |       |       | 0.7500   |       |       | 0.7500   |       |       |
| Depolar (U) | -- | 0.2631   |       |       | 0.8571   |       |       | 0.8571   |       |       |
| Atom AN     |    | X        | Y     | Z     | X        | Y     | Z     | X        | Y     | Z     |
| 1           | 24 | 0.00     | 0.00  | -0.05 | 0.10     | 0.01  | 0.00  | -0.01    | 0.10  | 0.00  |
| 2           | 7  | 0.00     | 0.00  | 0.44  | 0.52     | 0.03  | 0.00  | -0.03    | 0.52  | 0.00  |
| 3           | 8  | 0.00     | 0.00  | 0.49  | -0.18    | -0.01 | 0.00  | 0.01     | -0.18 | 0.00  |
| 4           | 6  | 0.00     | 0.00  | -0.02 | -0.14    | -0.01 | 0.00  | 0.01     | -0.14 | 0.00  |
| 5           | 8  | 0.00     | 0.00  | -0.03 | 0.02     | 0.00  | 0.00  | 0.00     | 0.02  | 0.00  |
| 6           | 6  | 0.00     | 0.00  | -0.36 | -0.47    | 0.00  | 0.02  | 0.03     | -0.02 | 0.28  |
| 7           | 8  | 0.00     | 0.02  | 0.10  | 0.14     | 0.00  | 0.00  | -0.01    | -0.03 | -0.07 |
| 8           | 6  | 0.00     | 0.00  | -0.36 | -0.47    | 0.00  | -0.02 | 0.03     | -0.02 | -0.28 |
| 9           | 8  | 0.00     | -0.02 | 0.10  | 0.14     | 0.00  | 0.00  | -0.01    | -0.03 | 0.07  |
| 10          | 6  | 0.00     | 0.00  | -0.36 | -0.02    | -0.03 | -0.28 | 0.00     | -0.47 | 0.02  |
| 11          | 8  | -0.02    | 0.00  | 0.10  | -0.03    | 0.01  | 0.07  | 0.00     | 0.14  | 0.00  |
| 12          | 6  | 0.00     | 0.00  | -0.36 | -0.02    | -0.03 | 0.28  | 0.00     | -0.47 | -0.02 |
| 13          | 8  | 0.02     | 0.00  | 0.10  | -0.03    | 0.01  | -0.07 | 0.00     | 0.14  | 0.00  |
|             |    |          | 25    |       |          | 26    |       |          | 27    |       |
|             |    |          | A1    |       |          | E     |       |          | E     |       |
| Frequencies | -- | 660.4401 |       |       | 692.9789 |       |       | 692.9789 |       |       |
| Red. masses | -- | 21.4994  |       |       | 17.9241  |       |       | 17.9241  |       |       |
| Frc consts  | -- | 5.5251   |       |       | 5.0714   |       |       | 5.0714   |       |       |

|             |    |           |       |       |           |       |       |           |       |       |
|-------------|----|-----------|-------|-------|-----------|-------|-------|-----------|-------|-------|
| IR Inten    | -- | 133.2899  |       |       | 98.8835   |       |       | 98.8835   |       |       |
| Raman Activ | -- | 18.8371   |       |       | 0.3012    |       |       | 0.3012    |       |       |
| Depolar (P) | -- | 0.2838    |       |       | 0.7500    |       |       | 0.7500    |       |       |
| Depolar (U) | -- | 0.4421    |       |       | 0.8571    |       |       | 0.8571    |       |       |
| Atom AN     |    | X         | Y     | Z     | X         | Y     | Z     | X         | Y     | Z     |
| 1           | 24 | 0.00      | 0.00  | 0.46  | 0.34      | -0.01 | 0.00  | 0.01      | 0.34  | 0.00  |
| 2           | 7  | 0.00      | 0.00  | -0.35 | -0.69     | 0.01  | 0.00  | -0.01     | -0.69 | 0.00  |
| 3           | 8  | 0.00      | 0.00  | -0.41 | 0.22      | 0.00  | 0.00  | 0.00      | 0.22  | 0.00  |
| 4           | 6  | 0.00      | 0.00  | -0.06 | -0.32     | 0.00  | 0.00  | 0.00      | -0.32 | 0.00  |
| 5           | 8  | 0.00      | 0.00  | -0.06 | 0.08      | 0.00  | 0.00  | 0.00      | 0.08  | 0.00  |
| 6           | 6  | 0.00      | 0.00  | -0.34 | -0.31     | 0.00  | 0.00  | 0.00      | -0.07 | -0.11 |
| 7           | 8  | 0.00      | 0.01  | 0.09  | 0.08      | 0.00  | 0.00  | 0.00      | -0.07 | 0.03  |
| 8           | 6  | 0.00      | 0.00  | -0.34 | -0.31     | 0.00  | 0.00  | 0.00      | -0.07 | 0.11  |
| 9           | 8  | 0.00      | -0.01 | 0.09  | 0.08      | 0.00  | 0.00  | 0.00      | -0.07 | -0.03 |
| 10          | 6  | 0.00      | 0.00  | -0.34 | -0.07     | 0.00  | 0.11  | 0.00      | -0.31 | 0.00  |
| 11          | 8  | -0.01     | 0.00  | 0.09  | -0.07     | 0.00  | -0.03 | 0.00      | 0.08  | 0.00  |
| 12          | 6  | 0.00      | 0.00  | -0.34 | -0.07     | 0.00  | -0.11 | 0.00      | -0.31 | 0.00  |
| 13          | 8  | 0.01      | 0.00  | 0.09  | -0.07     | 0.00  | 0.03  | 0.00      | 0.08  | 0.00  |
|             |    |           | 28    |       |           | 29    |       |           | 30    |       |
|             |    |           | A1    |       |           | E     |       |           | E     |       |
| Frequencies | -- | 1899.4584 |       |       | 2085.2401 |       |       | 2085.2401 |       |       |
| Red. masses | -- | 14.7517   |       |       | 13.4125   |       |       | 13.4125   |       |       |
| Frc consts  | -- | 31.3582   |       |       | 34.3614   |       |       | 34.3614   |       |       |
| IR Inten    | -- | 1052.1302 |       |       | 1054.6934 |       |       | 1054.6934 |       |       |
| Raman Activ | -- | 38.9177   |       |       | 4.7039    |       |       | 4.7039    |       |       |
| Depolar (P) | -- | 0.4821    |       |       | 0.7500    |       |       | 0.7500    |       |       |
| Depolar (U) | -- | 0.6506    |       |       | 0.8571    |       |       | 0.8571    |       |       |
| Atom AN     |    | X         | Y     | Z     | X         | Y     | Z     | X         | Y     | Z     |
| 1           | 24 | 0.00      | 0.00  | -0.01 | 0.00      | 0.00  | 0.00  | 0.00      | 0.00  | 0.00  |
| 2           | 7  | 0.00      | 0.00  | 0.77  | 0.00      | 0.00  | 0.00  | 0.00      | 0.00  | 0.00  |
| 3           | 8  | 0.00      | 0.00  | -0.61 | 0.00      | 0.00  | 0.00  | 0.00      | 0.00  | 0.00  |
| 4           | 6  | 0.00      | 0.00  | 0.07  | 0.00      | 0.00  | 0.00  | 0.00      | 0.00  | 0.00  |
| 5           | 8  | 0.00      | 0.00  | -0.07 | 0.00      | 0.00  | 0.00  | 0.00      | 0.00  | 0.00  |
| 6           | 6  | 0.00      | -0.06 | 0.00  | 0.00      | 0.57  | -0.02 | 0.00      | 0.04  | 0.00  |
| 7           | 8  | 0.00      | 0.04  | 0.00  | 0.00      | -0.42 | 0.01  | 0.00      | -0.03 | 0.00  |
| 8           | 6  | 0.00      | 0.06  | 0.00  | 0.00      | 0.57  | 0.02  | 0.00      | 0.04  | 0.00  |
| 9           | 8  | 0.00      | -0.04 | 0.00  | 0.00      | -0.42 | -0.01 | 0.00      | -0.03 | 0.00  |
| 10          | 6  | 0.06      | 0.00  | 0.00  | -0.04     | 0.00  | 0.00  | 0.57      | 0.00  | 0.02  |
| 11          | 8  | -0.04     | 0.00  | 0.00  | 0.03      | 0.00  | 0.00  | -0.42     | 0.00  | -0.01 |
| 12          | 6  | -0.06     | 0.00  | 0.00  | -0.04     | 0.00  | 0.00  | 0.57      | 0.00  | -0.02 |
| 13          | 8  | 0.04      | 0.00  | 0.00  | 0.03      | 0.00  | 0.00  | -0.42     | 0.00  | 0.01  |
|             |    |           | 31    |       |           | 32    |       |           | 33    |       |
|             |    |           | B2    |       |           | A1    |       |           | A1    |       |
| Frequencies | -- | 2097.1764 |       |       | 2122.7714 |       |       | 2160.8866 |       |       |
| Red. masses | -- | 13.3708   |       |       | 13.3830   |       |       | 13.3810   |       |       |
| Frc consts  | -- | 34.6478   |       |       | 35.5311   |       |       | 36.8130   |       |       |
| IR Inten    | -- | 0.0000    |       |       | 230.2615  |       |       | 91.4583   |       |       |
| Raman Activ | -- | 340.0713  |       |       | 217.2408  |       |       | 176.5583  |       |       |
| Depolar (P) | -- | 0.7500    |       |       | 0.7500    |       |       | 0.0001    |       |       |
| Depolar (U) | -- | 0.8571    |       |       | 0.8571    |       |       | 0.0002    |       |       |
| Atom AN     |    | X         | Y     | Z     | X         | Y     | Z     | X         | Y     | Z     |
| 1           | 24 | 0.00      | 0.00  | 0.00  | 0.00      | 0.00  | 0.00  | 0.00      | 0.00  | 0.00  |
| 2           | 7  | 0.00      | 0.00  | 0.00  | 0.00      | 0.00  | 0.00  | 0.00      | 0.00  | -0.13 |
| 3           | 8  | 0.00      | 0.00  | 0.00  | 0.00      | 0.00  | 0.00  | 0.00      | 0.00  | 0.09  |
| 4           | 6  | 0.00      | 0.00  | 0.00  | 0.00      | 0.00  | 0.66  | 0.00      | 0.00  | 0.45  |
| 5           | 8  | 0.00      | 0.00  | 0.00  | 0.00      | 0.00  | -0.49 | 0.00      | 0.00  | -0.33 |
| 6           | 6  | 0.00      | -0.41 | 0.01  | 0.00      | 0.23  | -0.01 | 0.00      | -0.33 | 0.01  |
| 7           | 8  | 0.00      | 0.29  | -0.01 | 0.00      | -0.16 | 0.01  | 0.00      | 0.24  | -0.01 |
| 8           | 6  | 0.00      | 0.41  | 0.01  | 0.00      | -0.23 | -0.01 | 0.00      | 0.33  | 0.01  |
| 9           | 8  | 0.00      | -0.29 | -0.01 | 0.00      | 0.16  | 0.01  | 0.00      | -0.24 | -0.01 |
| 10          | 6  | -0.41     | 0.00  | -0.01 | -0.23     | 0.00  | -0.01 | 0.33      | 0.00  | 0.01  |
| 11          | 8  | 0.29      | 0.00  | 0.01  | 0.16      | 0.00  | 0.01  | -0.24     | 0.00  | -0.01 |
| 12          | 6  | 0.41      | 0.00  | -0.01 | 0.23      | 0.00  | -0.01 | -0.33     | 0.00  | 0.01  |
| 13          | 8  | -0.29     | 0.00  | 0.01  | -0.16     | 0.00  | 0.01  | 0.24      | 0.00  | -0.01 |

1. A. Reisinger. *Chemistry with weakly coordinating anions. Strong Brønsted acids and group 11 metal complexes*. (Dissertation, University of Freiburg (Breisgau), 2006, Cuvillier, Göttingen, 2007).
2. Engesser, T. A. *et al.* Homoleptic Gold Acetonitrile Complexes with Medium to Very Weakly Coordinating Counterions. Effect on Auophilicity? *Chem. Eur. J.* **22**, 15085–15094; 10.1002/chem.201602797 (2016).
3. Rohde, M., Müller, L. O., Himmel, D., Scherer, H. & Krossing, I. A Janus-headed Lewis superacid. Simple access to, and first application of Me<sub>3</sub>Si-F-Al(OR<sup>F</sup>)<sub>3</sub>. *Chem. Eur. J.* **20**, 1218–1222; 10.1002/chem.201303671 (2014).
4. Saielli, G., Bini, R. & Bagno, A. Computational <sup>19</sup>F NMR. 2. Organic compounds. *RSC Adv.* **4**, 41605–41611; 10.1039/C4RA08290G (2014).
5. Fulmer, G. R. *et al.* NMR Chemical Shifts of Trace Impurities. Common Laboratory Solvents, Organics, and Gases in Deuterated Solvents Relevant to the Organometallic Chemist. *Organometallics* **29**, 2176–2179; 10.1021/om100106e (2010).
6. Wray, V., Ernst, L. & Lustig, E. The complete <sup>13</sup>C <sup>19</sup>F, and <sup>1</sup>H spectral analysis of the fluorobenzenes C<sub>6</sub>H<sub>n</sub>F<sub>6-n</sub>. III. The remaining members of the series; INDO MO calculations of JFH, JFF, JCH, and JCF. *Journal of Magnetic Resonance (1969)* **27**, 1–21; 10.1016/0022-2364(77)90188-3 (1977).
7. Bain, G. A. & Berry, J. F. Diamagnetic Corrections and Pascal's Constants. *J. Chem. Educ.* **85**, 532; 10.1021/ed085p532 (2008).
8. Grant, D. H. Paramagnetic Susceptibility by NMR. The "Solvent Correction" Reexamined. *J. Chem. Educ.* **72**, 39; 10.1021/ed072p39 (1995).
9. Evans, D. F. The determination of the paramagnetic susceptibility of substances in solution by nuclear magnetic resonance. *J. Chem. Soc.*, 2003; 10.1039/jr9590002003 (1959).
10. SAINT V8.37A, Bruker AXS, Madison, Wisconsin, USA (2015).
11. Krause, L., Herbst-Irmer, R., Sheldrick, G. M. & Stalke, D. Comparison of silver and molybdenum microfocus X-ray sources for single-crystal structure determination. *J. Appl. Crystallogr.* **48**, 3–10; 10.1107/S1600576714022985 (2015).
12. Sheldrick, G. M. A short history of SHELX. *Acta Cryst. A* **64**, 112–122; 10.1107/S0108767307043930 (2008).
13. Sheldrick, G. M. SHELXT - integrated space-group and crystal-structure determination. *Acta Cryst. A* **71**, 3–8; 10.1107/S2053273314026370 (2015).
14. Sheldrick, G. M. Crystal structure refinement with SHELXL. *Acta Cryst. C* **71**, 3–8; 10.1107/S2053229614024218 (2015).

15. Hübschle, C. B., Sheldrick, G. M. & Dittrich, B. ShelXle. A Qt graphical user interface for SHELXL. *J. Appl. Crystallogr.* **44**, 1281–1284; 10.1107/S0021889811043202 (2011).
16. Kratzert, D., Holstein, J. J. & Krossing, I. DSR. Enhanced modelling and refinement of disordered structures with SHELXL. *J. Appl. Crystallogr.* **48**, 933–938; 10.1107/S1600576715005580 (2015).
17. Macrae, C. F. *et al.* Mercury CSD 2.0 – new features for the visualization and investigation of crystal structures. *J. Appl. Crystallogr.* **41**, 466–470; 10.1107/S0021889807067908 (2008).
18. Dolomanov, O. V., Bourhis, L. J., Gildea, R. J., Howard, J. A. K. & Puschmann, H. OLEX2. A complete structure solution, refinement and analysis program. *J. Appl. Crystallogr.* **42**, 339–341; 10.1107/S0021889808042726 (2009).
19. Turner M.J., *e. a.* CrystalExplorer17, University of Western Australia. <http://hirshfeldsurface.net> (2017).
20. MATLAB R2017a (9.2.0). *The MathWorks* (2017).
21. Stoll, S. & Schweiger, A. EasySpin, a comprehensive software package for spectral simulation and analysis in EPR. *J. Magn. Reson.* **178**, 42–55; 10.1016/j.jmr.2005.08.013 (2006).
22. Treutler, O. & Ahlrichs, R. Efficient molecular numerical integration schemes. *J. Chem. Phys.* **102**, 346–354; 10.1063/1.469408 (1995).
23. Ahlrichs, R., Bär, M., Häser, M., Horn, H. & Kölmel, C. Electronic structure calculations on workstation computers. The program system turbomole. *Chem. Phys. Lett.* **162**, 165–169; 10.1016/0009-2614(89)85118-8 (1989).
24. Perdew, J. P. Erratum. Density-functional approximation for the correlation energy of the inhomogeneous electron gas. *Phys. Rev. B* **34**, 7406; 10.1103/PhysRevB.34.7406 (1986).
25. Perdew, J. P. Density-functional approximation for the correlation energy of the inhomogeneous electron gas. *Phys. Rev. B* **33**, 8822–8824; 10.1103/PhysRevB.33.8822 (1986).
26. Ahlrichs, R. Efficient evaluation of three-center two-electron integrals over Gaussian functions. *Phys. Chem. Chem. Phys.* **6**, 5119; 10.1039/b413539c (2004).
27. Sierka, M., Hoge Kamp, A. & Ahlrichs, R. Fast evaluation of the Coulomb potential for electron densities using multipole accelerated resolution of identity approximation. *J. Chem. Phys.* **118**, 9136–9148; 10.1063/1.1567253 (2003).



28. Weigend, F. & Ahlrichs, R. Balanced basis sets of split valence, triple zeta valence and quadruple zeta valence quality for H to Rn. Design and assessment of accuracy. *Phys. Chem. Chem. Phys.* **7**, 3297–3305; 10.1039/b508541a (2005).
29. Grimme, S., Ehrlich, S. & Goerigk, L. Effect of the damping function in dispersion corrected density functional theory. *J. Comput. Chem.* **32**, 1456–1465; 10.1002/jcc.21759 (2011).
30. Grimme, S., Antony, J., Ehrlich, S. & Krieg, H. A consistent and accurate ab initio parametrization of density functional dispersion correction (DFT-D) for the 94 elements H–Pu. *J. Chem. Phys.* **132**, 154104; 10.1063/1.3382344 (2010).
31. Deglmann, P., Furche, F. & Ahlrichs, R. An efficient implementation of second analytical derivatives for density functional methods. *Chem. Phys. Lett.* **362**, 511–518; 10.1016/S0009-2614(02)01084-9 (2002).
32. M. J. Frisch, G. W. Trucks, H. B. Schlegel, G. E. Scuseria, M. A. Robb, J. R. Cheeseman, J. A. Montgomery, Jr., T. Vreven, K. N. Kudin, J. C. Burant, J. M. Millam, S. S. Iyengar, J. Tomasi, V. Barone, B. Mennucci, M. Cossi, G. Scalmani, N. Rega, G. A. Petersson, H. Nakatsuji, M. Hada, M. Ehara, K. Toyota, R. Fukuda, J. Hasegawa, M. Ishida, T. Nakajima, Y. Honda, O. Kitao, H. Nakai, M. Klene, X. Li, J. E. Knox, H. P. Hratchian, J. B. Cross, V. Bakken, C. Adamo, J. Jaramillo, R. Gomperts, R. E. Stratmann, O. Yazyev, A. J. Austin, R. Cammi, C. Pomelli, J. W. Ochterski, P. Y. Ayala, K. Morokuma, G. A. Voth, P. Salvador, J. J. Dannenberg, V. G. Zakrzewski, S. Dapprich, A. D. Daniels, M. C. Strain, O. Farkas, D. K. Malick, A. D. Rabuck, K. Raghavachari, J. B. Foresman, J. V. Ortiz, Q. Cui, A. G. Baboul, S. Clifford, J. Cioslowski, B. B. Stefanov, G. Liu, A. Liashenko, P. Piskorz, I. Komaromi, R. L. Martin, D. J. Fox, T. Keith, M. A. Al-Laham, C. Y. Peng, A. Nanayakkara, M. Challacombe, P. M. W. Gill, B. Johnson, W. Chen, M. W. Wong, C. Gonzalez, and J. A. Pople. Gaussian 03, Revision D.01. *Gaussian, Inc.* (2004).
33. Staroverov, V. N., Scuseria, G. E., Tao, J. & Perdew, J. P. Comparative assessment of a new nonempirical density functional. Molecules and hydrogen-bonded complexes. *J. Chem. Phys.* **119**, 12129–12137; 10.1063/1.1626543 (2003).
34. Tao, J., Perdew, J. P., Staroverov, V. N. & Scuseria, G. E. Climbing the density functional ladder. Nonempirical meta-generalized gradient approximation designed for molecules and solids. *Phys. Rev. Lett.* **91**, 146401; 10.1103/PhysRevLett.91.146401 (2003).
35. Liakos, D. G., Sparta, M., Kesharwani, M. K., Martin, J. M. L. & Neese, F. Exploring the Accuracy Limits of Local Pair Natural Orbital Coupled-Cluster Theory. *J. Chem. Theory Comput.* **11**, 1525–1539; 10.1021/ct501129s (2015).

36. Riplinger, C., Sandhoefer, B., Hansen, A. & Neese, F. Natural triple excitations in local coupled cluster calculations with pair natural orbitals. *J. Chem. Phys.* **139**, 134101; 10.1063/1.4821834 (2013).
37. Neese, F. The ORCA program system. *WIREs Comput. Mol. Sci. (Wiley Interdisciplinary Reviews: Computational Molecular Science)* **2**, 73–78; 10.1002/wcms.81 (2012).
38. Neese, F. An improvement of the resolution of the identity approximation for the formation of the Coulomb matrix. *J. Comput. Chem.* **24**, 1740–1747; 10.1002/jcc.10318 (2003).
39. Izsák, R. & Neese, F. An overlap fitted chain of spheres exchange method. *J. Chem. Phys.* **135**, 144105; 10.1063/1.3646921 (2011).
40. Izsák, R. & Neese, F. Speeding up spin-component-scaled third-order perturbation theory with the chain of spheres approximation. The COSX-SCS-MP3 method. *Mol. Phys.* **111**, 1190–1195; 10.1080/00268976.2013.796071 (2013).
41. Helgaker, T., Jørgensen, P. & Olsen, J. *Molecular electronic-structure theory* (Wiley, Chichester, New York, 2012).
42. Balabanov, N. B. & Peterson, K. A. Systematically convergent basis sets for transition metals. I. All-electron correlation consistent basis sets for the 3d elements Sc-Zn. *The Journal of Chemical Physics* **123**, 64107; 10.1063/1.1998907 (2005).
43. Dunning, T. H. Gaussian basis sets for use in correlated molecular calculations. I. The atoms boron through neon and hydrogen. *The Journal of Chemical Physics* **90**, 1007–1023; 10.1063/1.456153 (1989).
44. Angeli, C., Cimiraglia, R. & Malrieu, J.-P. n -electron valence state perturbation theory. A spinless formulation and an efficient implementation of the strongly contracted and of the partially contracted variants. *J. Chem. Phys.* **117**, 9138–9153; 10.1063/1.1515317 (2002).
45. Angeli, C., Cimiraglia, R., Evangelisti, S., Leininger, T. & Malrieu, J.-P. Introduction of n -electron valence states for multireference perturbation theory. *J. Chem. Phys.* **114**, 10252–10264; 10.1063/1.1361246 (2001).
46. Miller, J. S. & Drillon, M. eds. *Magnetism. Molecules to Materials V* (Wiley-VCH, Weinheim, 2006).
47. Raabe, I. *et al.* Tetraalkylammonium salts of weakly coordinating aluminates. Ionic liquids, materials for electrochemical applications and useful compounds for anion investigation. *Chem. Eur. J.* **15**, 1966–1976; 10.1002/chem.200800417 (2009).
48. Lehner, A. J., Trapp, N., Scherer, H. & Krossing, I.  $\text{CCl}_3^+$  and  $\text{CBr}_3^+$  salts with the  $[\text{Al}(\text{OR}^{\text{F}})_4]^-$  and  $[(^{\text{F}}\text{RO})_3\text{Al-F-Al}(\text{OR}^{\text{F}})_3]^-$  anions ( $\text{R}^{\text{F}} = \text{C}(\text{CF}_3)_3$ ). *Dalton Trans.* **40**, 1448–1452; 10.1039/c0dt01076f (2011).

49. Bernhardt, E. *et al.*  $D_{3d}$  Ground-State Structure of  $V(CO)_6$ . A Combined Matrix Isolation and ab Initio Study of the Jahn–Teller Effect. *J. Phys. Chem. A* **107**, 859–868; 10.1021/jp021835u (2003).
50. Zhao, Y. & Truhlar, D. G. A new local density functional for main-group thermochemistry, transition metal bonding, thermochemical kinetics, and noncovalent interactions. *J. Chem. Phys.* **125**, 194101; 10.1063/1.2370993 (2006).
51. Becke, A. D. Density-functional thermochemistry. III. The role of exact exchange. *J. Chem. Phys.* **98**, 5648–5652; 10.1063/1.464913 (1993).
52. van Lenthe, E., Baerends, E. J. & Snijders, J. G. Relativistic total energy using regular approximations. *The Journal of Chemical Physics* **101**, 9783–9792; 10.1063/1.467943 (1994).
53. Visscher, L. & Dyall, K. G. Dirac–Fock Atomic Electronic Structure Calculations Using Different Nuclear Charge Distributions. *Atom. Data Nucl. Data* **67**, 207–224; 10.1006/adnd.1997.0751 (1997).
54. Gabbai, F. P. *et al.* An Editorial About Elemental Analysis. *Organometallics* **35**, 3255–3256; 10.1021/acs.organomet.6b00720 (2016).
55. Marc, A., Compa, R., Rubio, R. & Casals, I. Assessment of Additives for Nitrogen, Carbon, Hydrogen and Sulfur Determination by Organic Elemental Analysis. *Microchimica Acta* **142**, 13–19; 10.1007/s00604-002-0956-y (2003).
56. Toby, B. H. EXPGUI, a graphical user interface for GSAS. *J Appl Crystallogr* **34**, 210–213; 10.1107/S0021889801002242 (2001).
57. R. B. von Dreele, A. C. Larson. General Structure Analysis System (GSAS). *Los Alamos National Laboratory Report LAUR 86-748* (2000).
58. Lee, C., Yang, W. & Parr, R. G. Development of the Colle-Salvetti correlation-energy formula into a functional of the electron density. *Phys. Rev. B* **37**, 785–789; 10.1103/PhysRevB.37.785 (1988).
59. Becke, A. D. BP86 Funktional. *Phys. Rev. A* **38**, 3098–3100 (1988).
60. Schäfer, A., Horn, H. & Ahlrichs, R. SVP (teilweise auch def2-SVP). *J. Chem. Phys.* **97**, 2571–2577; 10.1063/1.463096 (1992).
61. Weigend, F., Köhn, A. & Hättig, C. Efficient use of the correlation consistent basis sets in resolution of the identity MP2 calculations. *J. Chem. Phys.* **116**, 3175–3183; 10.1063/1.1445115 (2002).

62. Eichkorn, K., Weigend, F., Treutler, O. & Ahlrichs, R. Auxiliary basis sets for main row atoms and transition metals and their use to approximate Coulomb potentials. *Theor. Chim. Acta* **97**, 119–124; 10.1007/s002140050244 (1997).
63. Eichkorn, K., Treutler, O., Öhm, H., Häser, M. & Ahlrichs, R. Auxiliary basis sets to approximate Coulomb potentials (Chem. Phys. Letters 240 (1995) 283-290). *Chem. Phys. Lett.* **242**, 652–660; 10.1016/0009-2614(95)00838-U (1995).
64. Eichkorn, K., Treutler, O., Öhm, H., Häser, M. & Ahlrichs, R. Auxiliary basis sets to approximate Coulomb potentials. *Chem. Phys. Lett.* **240**, 283–290; 10.1016/0009-2614(95)00621-A (1995).
65. Weigend, F. Accurate Coulomb-fitting basis sets for H to Rn. *Phys. Chem. Chem. Phys.* **8**, 1057–1065; 10.1039/b515623h (2006).
66. Klamt, A., Jonas, V., Bürger, T. & Lohrenz, J. C. W. Refinement and Parametrization of COSMO-RS. *J. Phys. Chem. A* **102**, 5074–5085; 10.1021/jp980017s (1998).
67. Klamt, A. Conductor-like Screening Model for Real Solvents. A New Approach to the Quantitative Calculation of Solvation Phenomena. *J. Phys. Chem.* **99**, 2224–2235; 10.1021/j100007a062 (1995).
68. Eckert, F. & Klamt, A. *COSMOTerm* (COSMOTerm, C3.0, release 1501, COSMOlogic GmbH & Co KG, <http://www.cosmologic.de>, 2015).
69. Eckert, F. & Klamt, A. Fast solvent screening via quantum chemistry. COSMO-RS approach. *AIChE J.* **48**, 369–385; 10.1002/aic.690480220 (2002).
